# Supplementary material for: OPTiMAL: a new machine learning approach for GDGT-based palaeothermometry
Source: Copernicus journal article supplement (doi:10.5194/cp-16-2599-2020), 2020-12-23
Supplement: Supplementary file 2 [file cp-16-2599-2020-supplement.zip]

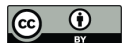

## *Supplement of*

# **OPTiMAL: a new machine learning approach for GDGT-based palaeothermometry**

**Tom Dunkley Jones et al.**

*Correspondence to:* Tom Dunkley Jones ([t.dunkleyjones@bham.ac.uk](mailto:t.dunkleyjones@bham.ac.uk))

- cp-16-2599-2020-supplement-title-page.pdf
- FINAL SI Nov2020.pdf
- OPTiMAL SI.xlsx
- \_\_MACOSX
  - .\_FINAL SI Nov2020.pdf
  - .\_OPTiMAL SI.xlsx

The copyright of individual parts of the supplement might differ from the CC BY 4.0 License.
