# Supplementary material for: OPTiMAL: a new machine learning approach for GDGT-based palaeothermometry
Source: Copernicus journal article supplement (doi:10.5194/cp-16-2599-2020), 2020-12-23
Supplement: Supplementary file 4 [file cp-16-2599-2020-supplement.zip]

Archive with 6 entries (5 files):
- FINAL SI Nov2020.pdf
- cp-16-2599-2020-supplement-title-page.pdf
- __MACOSX/
- __MACOSX/._FINAL SI Nov2020.pdf
- __MACOSX/._OPTiMAL SI.xlsx
- OPTiMAL SI.xlsx
