# Supplementary material for: OPTiMAL: a new machine learning approach for GDGT-based palaeothermometry
Source: Copernicus journal article supplement (doi:10.5194/cp-16-2599-2020), 2020-12-23
Supplement: Supplementary file 4 [file cp-16-2599-2020-supplement.zip › OPTiMAL SI.xlsx]

## Sheet: OPTiMAL (Op1)
Original OPTiMAL modern core top calibration dataset (as per Eley et al. 2019; Climates of the Past Discussions doi.org/10.5194/cp-2019-60). This combines the full core-top data of Tierney & Tingley (2015) doi.org/10.1038/sdata.2015.29 with additional data from Seki et al. (2014) doi.org/10.1016/j.pocean.2014.04.013.
Core name	Source	GDGT-0	GDGT-1	GDGT-2	GDGT-3	Crenarchaeol	Cren'	longitude	latitude	Sea Surface Temp	water depth
1	Tierney and Tingley 2015	0.285	0.059	0.039	0.015	0.596	0.006	122.67	32	16	30
2	Tierney and Tingley 2015	0.283	0.065	0.043	0.022	0.587	0	123	32	16	37
3	Tierney and Tingley 2015	0.257	0.053	0.037	0.013	0.635	0.005	122.33	31.75	16.8	23
4	Tierney and Tingley 2015	0.3073	0.0561	0.041	0.014	0.5756	0.006	123	31.75	16.8	36
5	Tierney and Tingley 2015	0.3046	0.0581	0.0431	0.014	0.5731	0.007	123.33	31.75	17.8	33
6	Tierney and Tingley 2015	0.432	0.115	0.057	0.021	0.37	0.005	122.17	31.5	16.8	7
7	Tierney and Tingley 2015	0.449	0.029	0.015	0.005	0.5	0.002	122.33	31.5	16.8	16
8	Tierney and Tingley 2015	0.2667	0.0599	0.041	0.015	0.6094	0.008	122.5	31.5	16.8	28
9	Tierney and Tingley 2015	0.273	0.064	0.045	0.018	0.591	0.009	122.67	31.5	16.8	38
10	Tierney and Tingley 2015	0.2767	0.0629	0.043	0.016	0.5944	0.007	123	31.5	16.8	32
11	Tierney and Tingley 2015	0.283	0.05	0.034	0.012	0.613	0.008	122.5	31.5	16.8	22
12	Tierney and Tingley 2015	0.263	0.057	0.04	0.014	0.619	0.007	122.67	31.25	16.8	37
13	Tierney and Tingley 2015	0.2807	0.0599	0.049	0.017	0.5854	0.008	122	31.25	16.8	7
14	Tierney and Tingley 2015	0.273	0.059	0.044	0.015	0.602	0.007	122.17	31	16.8	8
15	Tierney and Tingley 2015	0.2687	0.0519	0.038	0.013	0.6214	0.007	122.33	31	16.8	8
16	Tierney and Tingley 2015	0.2677	0.0539	0.036	0.013	0.6224	0.007	122.67	31	16.8	20
17	Tierney and Tingley 2015	0.264	0.038	0.046	0.015	0.63	0.007	122	30.75	19.7	10
18	Tierney and Tingley 2015	0.2557	0.0529	0.037	0.014	0.6314	0.009	122.5	30.75	19.7	14
19	Tierney and Tingley 2015	0.27	0.06	0.041	0.015	0.606	0.008	122.67	30.75	19.7	38
20	Tierney and Tingley 2015	0.4456	0.0639	0.0639	0.022	0.3896	0.015	123	30.75	19.7	46
20	Tierney and Tingley 2015	0.2882	0.0808	0.0861	0.0141	0.4886	0.0422	-48.35	4.04	27.4	1088
21	Tierney and Tingley 2015	0.278	0.056	0.043	0.015	0.601	0.007	122	31	16.8	11
21	Tierney and Tingley 2015	0.2606	0.0745	0.0824	0.0133	0.5319	0.0372	-48.54	3.96	27.4	738
22	Tierney and Tingley 2015	0.2322	0.0521	0.042	0.015	0.6517	0.007	122.33	30.5	19.7	24
23	Tierney and Tingley 2015	0.243	0.055	0.04	0.014	0.64	0.008	122.67	30.5	19.7	33
23	Tierney and Tingley 2015	0.2993	0.0743	0.075	0.0102	0.5085	0.0327	-49.06	3.68	27.5	107
24	Tierney and Tingley 2015	0.3606	0.0599	0.038	0.014	0.5175	0.01	124.5	32	17.7	39
25	Tierney and Tingley 2015	0.3263	0.0581	0.039	0.013	0.5546	0.009	125	32	17.8	47
25	Tierney and Tingley 2015	0.1533	0.0499	0.072	0.0441	0.6527	0.0279	-49.86	3.19	27.5	32
26	Tierney and Tingley 2015	0.295	0.052	0.035	0.011	0.6	0.007	124.5	31.5	17.7	44
27	Tierney and Tingley 2015	0.272	0.056	0.04	0.014	0.607	0.011	125	31.5	17.7	48
28	Tierney and Tingley 2015	0.2448	0.0569	0.041	0.015	0.6354	0.007	122.5	31	19.7	18
29	Tierney and Tingley 2015	0.2378	0.0559	0.043	0.016	0.6394	0.008	122.5	30	20.2	18
30	Tierney and Tingley 2015	0.269	0.063	0.047	0.017	0.594	0.01	124.5	30	20.5	68
31	Tierney and Tingley 2015	0.2478	0.0629	0.047	0.018	0.6114	0.013	123.11	29.47	20.8	63
32	Tierney and Tingley 2015	0.241	0.063	0.048	0.018	0.615	0.015	123.38	29.32	20.8	71
33	Tierney and Tingley 2015	0.2527	0.0649	0.049	0.018	0.6014	0.014	123.8	29.09	20.8	77
34	Tierney and Tingley 2015	0.241	0.062	0.046	0.017	0.62	0.014	122.43	28.29	21.6	66
35	Tierney and Tingley 2015	0.39	0.054	0.03	0.01	0.509	0.007	123.01	33	16.7	32
36	Tierney and Tingley 2015	0.387	0.056	0.029	0.011	0.512	0.005	119.67	35	13.9	21
37	Tierney and Tingley 2015	0.424	0.042	0.019	0.006	0.505	0.004	121	35	13.9	37
38	Tierney and Tingley 2015	0.428	0.035	0.016	0.005	0.512	0.004	123.5	35.01	15.4	77
39	Tierney and Tingley 2015	0.432	0.041	0.02	0.005	0.498	0.004	121.99	36	15.2	39
40	Tierney and Tingley 2015	0.3197	0.047	0.027	0.009	0.5914	0.006	124.01	33.01	17.5	49
41	Tierney and Tingley 2015	0.4625	0.03	0.012	0.004	0.4885	0.003	124	36	14.9	77
42	Tierney and Tingley 2015	0.471	0.031	0.013	0.004	0.478	0.003	125.12	36.92	13.8	51
43	Tierney and Tingley 2015	0.4635	0.025	0.009	0.004	0.4965	0.002	124.12	36.92	14.6	76
43	Tierney and Tingley 2015	0.0894	0.0531	0.0761	0.0534	0.7057	0.0224	-48.05	2.09	27.8	65
44	Tierney and Tingley 2015	0.521	0.03	0.015	0.005	0.426	0.003	123.62	36.92	14.9	72
45	Tierney and Tingley 2015	0.436	0.027	0.01	0.004	0.519	0.004	125.03	35.85	14.9	53
46	Tierney and Tingley 2015	0.39	0.04	0.023	0.007	0.535	0.005	124.03	35.85	15.2	77
47	Tierney and Tingley 2015	0.391	0.034	0.016	0.005	0.551	0.003	121.53	35.85	15.2	38
48	Tierney and Tingley 2015	0.4264	0.033	0.014	0.004	0.5185	0.004	124.82	34.72	15.7	81
49	Tierney and Tingley 2015	0.4625	0.034	0.015	0.005	0.4795	0.004	123.52	34.72	16	77
49	Tierney and Tingley 2015	0.3023	0.0766	0.0766	0.0104	0.5031	0.0311	-45.36	1.64	27.4	-999
50	Tierney and Tingley 2015	0.39	0.031	0.013	0.004	0.56	0.002	121.53	34.72	15.2	42
51	Tierney and Tingley 2015	0.3666	0.042	0.023	0.006	0.5594	0.003	121.03	34.72	15.2	23
52	Tierney and Tingley 2015	0.385	0.069	0.044	0.015	0.477	0.01	125	32.5	17.8	58
53	Tierney and Tingley 2015	0.4016	0.0619	0.034	0.012	0.4815	0.009	125.53	33.57	18	87
54	Tierney and Tingley 2015	0.421	0.055	0.028	0.006	0.481	0.009	124.03	33.57	17.5	71
54	Tierney and Tingley 2015	0.3659	0.064	0.0579	0.0091	0.4787	0.0244	-44.35	0.66	27.4	2372
55	Tierney and Tingley 2015	0.4494	0.043	0.02	0.007	0.4745	0.006	123.53	33.57	16.7	66
56	Tierney and Tingley 2015	0.3734	0.038	0.019	0.006	0.5596	0.004	122.53	33.57	15.8	39
57	Tierney and Tingley 2015	0.3257	0.046	0.029	0.009	0.5864	0.004	122.03	33.57	15.8	24
58	Tierney and Tingley 2015	0.247	0.053	0.044	0.011	0.641	0.004	121.53	33.57	15.1	17
13a	Tierney and Tingley 2015	0.2947	0.0801	0.0883	0.0154	0.4795	0.0421	-48.61	4.46	27.4	1711
22b	Tierney and Tingley 2015	0.2995	0.0887	0.0973	0.0171	0.4548	0.0427	-48.61	3.95	27.4	640
28b	Tierney and Tingley 2015	0.2737	0.0721	0.0792	0.0113	0.5283	0.0354	-48.17	3.78	27.4	1014
32b	Tierney and Tingley 2015	0.272	0.0772	0.0868	0.0127	0.5111	0.0402	-47.64	3.07	27.3	1028
32c	Tierney and Tingley 2015	0.2705	0.0691	0.0763	0.0115	0.5381	0.0345	-47.31	3.65	27.3	2079
42b	Tierney and Tingley 2015	0.2693	0.0666	0.0712	0.0155	0.5433	0.0341	-47.74	2.85	27.3	609
42d	Tierney and Tingley 2015	0.1235	0.0671	0.0859	0.0494	0.6459	0.0282	-47.85	2.57	27.3	110
44c	Tierney and Tingley 2015	0.277	0.0741	0.0748	0.0104	0.5281	0.0356	-46.25	3.39	27.4	3375
60b	Tierney and Tingley 2015	0.2872	0.0749	0.0769	0.0103	0.519	0.0318	-42.74	-1.03	27.1	3113
A5	Tierney and Tingley 2015	0.17	0.0597	0.0518	0.0159	0.6826	0.0201	114.98	20.9958	25.8	102
A7	Tierney and Tingley 2015	0.1943	0.0548	0.0397	0.0136	0.6863	0.0114	114.501	21.5033	25.1	73
A9	Tierney and Tingley 2015	0.2156	0.0465	0.0297	0.0111	0.69	0.007	113.999	22.0083	25.1	33
AII-107-6-17	Tierney and Tingley 2015	0.5008	0.0565	0.0232	0.0054	0.4006	0.0134	-22.182	-55.278	0.8	3926
AII-107-6-18	Tierney and Tingley 2015	0.4994	0.06	0.0267	0.0046	0.3962	0.0132	-21.975	-55.27	1	4119
AII-107-6-20	Tierney and Tingley 2015	0.4539	0.0613	0.0295	0.0065	0.4284	0.0205	-17.952	-54.857	1.8	4119
AII-107-6-24	Tierney and Tingley 2015	0.5112	0.0676	0.0207	0.0032	0.3883	0.0091	-8.718	-54.857	0.8	3255
AII-107-6-27	Tierney and Tingley 2015	0.5152	0.0698	0.0209	0.0042	0.3832	0.0068	-3.518	-54.753	0.7	2921
AII-107-6-70	Tierney and Tingley 2015	0.4745	0.0658	0.0303	0.0053	0.4134	0.0106	7.763	-47.535	5.3	2473
AII-107-6-72	Tierney and Tingley 2015	0.4833	0.0662	0.032	0.0052	0.4039	0.0096	8.008	-46.822	6.5	2270
AII-GGC-22	Tierney and Tingley 2015	0.5461	0.0608	0.0197	0.0034	0.3622	0.0078	-3.33	-54.792	0.7	2768
AII-GGC-28	Tierney and Tingley 2015	0.5143	0.06	0.0249	0.0031	0.3896	0.0081	7.542	-46.875	6.1	2517
AII-GGC-9	Tierney and Tingley 2015	0.5326	0.0502	0.0167	0.0032	0.39	0.0072	-32.498	-56.195	1	3223
All-093-19-96	Tierney and Tingley 2015	0.1332	0.057	0.0874	0.0257	0.6258	0.071	34.572	28.535	25.3	963
AMR-1	Tierney and Tingley 2015	0.5512	0.0341	0.0123	0.0028	0.3872	0.0124	140.237	-63.855	-0.4	3726
AMR-2	Tierney and Tingley 2015	0.5317	0.0322	0.011	0.0028	0.4109	0.0113	139.978	-64.658	-0.2	2948
BOFS 5K 0-1	Tierney and Tingley 2015	0.4118	0.0705	0.0414	0.0051	0.4522	0.0189	-21.688	50.865	12.8	3547
BOFS 8K 0-1	Tierney and Tingley 2015	0.4591	0.0754	0.0396	0.0064	0.4033	0.0162	-22.04	52.5	12.3	4045
BP00-02	Tierney and Tingley 2015	0.4733	0.023	0.0092	0.0054	0.4846	0.0045	74.0033	75.4019	1.4	50
BP00-26	Tierney and Tingley 2015	0.4866	0.0212	0.0084	0.0047	0.475	0.0039	77.9598	75.7085	1.8	68
BP00-36/04	Tierney and Tingley 2015	0.4956	0.0206	0.009	0.0056	0.4655	0.0037	81.9632	76.9618	1.1	66
BP00-38	Tierney and Tingley 2015	0.4699	0.0278	0.0107	0.0075	0.4794	0.0048	73.2385	73.1968	1.7	20
BP01-61	Tierney and Tingley 2015	0.489	0.0213	0.0101	0.0061	0.4694	0.0042	75.8825	76.2156	1	111
BP97-19	Tierney and Tingley 2015	0.4749	0.0222	0.0072	0.0049	0.4865	0.0042	79.0245	74.0007	2.3	30
BP97-32	Tierney and Tingley 2015	0.5341	0.0683	0.0264	0.015	0.346	0.0102	81.4812	72.0932	1.7	10
BP97-35	Tierney and Tingley 2015	0.4968	0.0465	0.015	0.0106	0.4235	0.0075	80.3287	72.5087	1.7	14
BP97-39	Tierney and Tingley 2015	0.4759	0.023	0.0075	0.0063	0.4828	0.0046	79.9175	73.536	1.7	40
BP97-47	Tierney and Tingley 2015	0.4965	0.0358	0.0139	0.0097	0.4392	0.0049	73.7485	72.5835	3.3	18
BP97-49	Tierney and Tingley 2015	0.4828	0.0245	0.0088	0.0071	0.4716	0.0053	72.8947	73.2095	1.5	29
BP97-50	Tierney and Tingley 2015	0.4912	0.0224	0.0065	0.0061	0.4691	0.0046	72.9513	73.611	1.5	28
BP97-52	Tierney and Tingley 2015	0.4835	0.0209	0.0066	0.0065	0.4772	0.0053	72.662	74.0003	2	30
BP99-08	Tierney and Tingley 2015	0.474	0.0293	0.012	0.0067	0.4721	0.0059	79.9897	72.9295	1.7	35
BP99-13	Tierney and Tingley 2015	0.4697	0.0199	0.0079	0.0049	0.494	0.0036	78	74.4973	3.4	36
BP99-18	Tierney and Tingley 2015	0.4941	0.0457	0.0186	0.011	0.4258	0.0048	74	72.333	3.3	35
BP99-19	Tierney and Tingley 2015	0.4859	0.0464	0.0213	0.0103	0.4297	0.0064	74.1858	72.189	3.3	35
BP99-20	Tierney and Tingley 2015	0.4871	0.034	0.0137	0.0082	0.4524	0.0046	74.7317	72.5135	3.3	35
BP99-25	Tierney and Tingley 2015	0.4646	0.0232	0.0079	0.0067	0.4926	0.0049	73.996	74.001	3.6	35
BP99-31	Tierney and Tingley 2015	0.4764	0.0375	0.015	0.0082	0.457	0.0059	79.761	72.486	1.7	35
BP99-32	Tierney and Tingley 2015	0.4773	0.0249	0.0099	0.0061	0.4778	0.004	79.954	73.1345	1.7	35
BP99-35	Tierney and Tingley 2015	0.46	0.0202	0.0055	0.0055	0.5034	0.0055	78.334	74.3008	2.4	29
BP99-37	Tierney and Tingley 2015	0.4788	0.0227	0.0076	0.0065	0.4791	0.0053	74.3342	74.3005	2.9	35
BS 01E-27	Tierney and Tingley 2015	0.4482	0.0434	0.0254	0.0116	0.4596	0.0118	29.5	45.5	13.3	27
BS 02E-105	Tierney and Tingley 2015	0.3918	0.0361	0.0134	0.0053	0.5428	0.0107	32	45	13.4	105
BS 04E-114	Tierney and Tingley 2015	0.3767	0.0369	0.0147	0.0061	0.5565	0.0091	30	44.5	13.8	114
BS 05E-564	Tierney and Tingley 2015	0.4058	0.0328	0.015	0.0035	0.5319	0.0109	30.5	44	14.4	564
BS 06E-335	Tierney and Tingley 2015	0.3819	0.0332	0.0175	0.0035	0.5527	0.0111	35	44.5	14.8	335
BS 07E-1288	Tierney and Tingley 2015	0.4148	0.0306	0.0141	0.0038	0.529	0.0078	34	44	14.2	1288
BS 09E-2129	Tierney and Tingley 2015	0.365	0.0368	0.0218	0.0055	0.5582	0.0128	34	45.5	14.1	2129
BS2 Arkona basin	Tierney and Tingley 2015	0.3462	0.0186	0.0065	0.0035	0.6216	0.0035	14.712	54.621	8.9	47
BS3	Tierney and Tingley 2015	0.4688	0.0233	0.0078	0.0029	0.4936	0.0036	16.712	55.621	8.4	66
BS4 Gotland deep	Tierney and Tingley 2015	0.4519	0.018	0.0066	0.0026	0.5173	0.0036	19.712	57.621	7.8	115
BS5 Gotland deep	Tierney and Tingley 2015	0.4333	0.0216	0.0072	0.0022	0.5319	0.0037	20.712	57.621	7.8	240
BS6 Baltic proper	Tierney and Tingley 2015	0.4062	0.0218	0.0077	0.0021	0.558	0.0042	20.712	58.621	7.7	175
BS625	Tierney and Tingley 2015	0.5419	0.0398	0.0117	0.0053	0.3975	0.0038	21.75	71.721	6.6	360
BS627	Tierney and Tingley 2015	0.5492	0.0329	0.0092	0.0042	0.4016	0.003	24.048	72.322	5.9	264
BS629	Tierney and Tingley 2015	0.5574	0.0261	0.0077	0.0037	0.4023	0.0028	24.251	73	5	404
BS631	Tierney and Tingley 2015	0.5517	0.0195	0.0057	0.0031	0.4178	0.0023	24.46	73.663	5	451
BS633	Tierney and Tingley 2015	0.5591	0.0189	0.006	0.0033	0.4106	0.0021	24.683	74.331	2.9	373
BS635	Tierney and Tingley 2015	0.4776	0.0135	0.0043	0.0029	0.4994	0.0022	24.938	75.001	0.5	182
BS639	Tierney and Tingley 2015	0.4971	0.0142	0.0045	0.0029	0.4794	0.0018	27.893	75.563	1.8	263
BS643	Tierney and Tingley 2015	0.5258	0.0148	0.0043	0.0026	0.4504	0.0021	29.905	76.486	0.7	291
BS645	Tierney and Tingley 2015	0.5124	0.0145	0.0044	0.0027	0.464	0.002	29.45	75.853	2.1	296
BS647	Tierney and Tingley 2015	0.5067	0.0153	0.0047	0.0028	0.4683	0.0023	29	75.201	2	343
BS649	Tierney and Tingley 2015	0.55	0.0172	0.0052	0.003	0.4225	0.002	28.566	74.535	3.8	394
BS651	Tierney and Tingley 2015	0.5596	0.0176	0.0053	0.0031	0.4126	0.0017	26.065	74.63	3.7	317
BS653	Tierney and Tingley 2015	0.5515	0.0198	0.0058	0.0031	0.4178	0.0021	25.798	73.972	4.8	441
BS655	Tierney and Tingley 2015	0.5642	0.0242	0.0068	0.0034	0.3991	0.0022	25.532	73.297	4.8	412
BS657	Tierney and Tingley 2015	0.5486	0.0281	0.0091	0.0042	0.4072	0.0028	25.269	72.634	5.7	268
BS659	Tierney and Tingley 2015	0.5421	0.0341	0.0104	0.0047	0.4057	0.0029	25.047	71.972	6.2	256
BS661	Tierney and Tingley 2015	0.5258	0.0389	0.0118	0.0053	0.4145	0.0037	22.758	71.371	6.4	408
BS665	Tierney and Tingley 2015	0.5436	0.0282	0.0085	0.0042	0.4126	0.0031	28.399	72.167	5.4	289
BS667	Tierney and Tingley 2015	0.5681	0.0274	0.0084	0.0037	0.3898	0.0026	28.754	72.832	5.4	305
BS669	Tierney and Tingley 2015	0.5527	0.021	0.0062	0.0032	0.4143	0.0025	29.146	73.501	4.7	414
BS671	Tierney and Tingley 2015	0.5431	0.019	0.0057	0.0032	0.4267	0.0024	-1.315	62.643	8.6	1702
BS673	Tierney and Tingley 2015	0.4712	0.0125	0.0042	0.003	0.5069	0.0022	32.49	74.667	2.9	165
BS675	Tierney and Tingley 2015	0.4798	0.0127	0.0042	0.003	0.4977	0.0025	33.069	75.315	2.1	209
BS677	Tierney and Tingley 2015	0.5127	0.0148	0.0048	0.0029	0.4624	0.0025	33.733	75.967	2.1	276
BS679	Tierney and Tingley 2015	0.5107	0.0158	0.0047	0.003	0.4639	0.0019	34.45	76.617	0.2	193
BS681	Tierney and Tingley 2015	0.5306	0.0154	0.0046	0.0027	0.4445	0.0021	37.167	76.433	0.7	249
BS690	Tierney and Tingley 2015	0.5295	0.0234	0.007	0.0035	0.4339	0.0028	30.947	71.013	5.8	283
BS692	Tierney and Tingley 2015	0.5183	0.0256	0.0078	0.0037	0.4415	0.003	31.712	70.621	5.5	252
BY31 Landsort deep	Tierney and Tingley 2015	0.4429	0.0215	0.0082	0.0025	0.5211	0.0038	18.712	58.621	7.3	466
BY310 Landsort deep oxic	Tierney and Tingley 2015	0.4957	0.0233	0.0073	0.0028	0.4676	0.0034	17.712	58.621	7.3	54
BY5 Bornholm	Tierney and Tingley 2015	0.4313	0.0234	0.0085	0.0028	0.5308	0.0032	15.712	55.621	8.4	89
Cariaco Basin	Tierney and Tingley 2015	0.1624	0.0651	0.0937	0.0237	0.6034	0.0516	-65.6	10.667	26.6
CB1 MC15	Tierney and Tingley 2015	0.434	0.0846	0.0547	0.0035	0.4062	0.0169	-128	46.75	12.2	2700
CB2 MC19	Tierney and Tingley 2015	0.4052	0.0704	0.0466	0.0037	0.4606	0.0135	-125.833	46.767	12.4	2700
CHN-043-1-4	Tierney and Tingley 2015	0.0894	0.0411	0.1019	0.0264	0.6366	0.1047	40.167	17.65	29.3	1470
CHN-043-1-5	Tierney and Tingley 2015	0.1397	0.0478	0.0931	0.0256	0.6034	0.0904	40.167	17.65	29.3	1296
CHN-115-4-34	Tierney and Tingley 2015	0.4471	0.0779	0.0337	0.0109	0.4201	0.0103	5.33	-51	2.4	3788
CHN-115-4-35	Tierney and Tingley 2015	0.5434	0.061	0.0192	0.0039	0.3655	0.0069	0.1	-53.6	0.7	2643
CHN-115-4-43	Tierney and Tingley 2015	0.4461	0.0578	0.0334	0.0096	0.4461	0.007	0.08	-54.592	-0.1	1260
CL03-35 BC	Tierney and Tingley 2015	0.4682	0.034	0.0127	0.0032	0.4773	0.0047	-58.712	46.621	6.3	370
D357 St. 0	Tierney and Tingley 2015	0.4141	0.0584	0.0268	0.0096	0.4683	0.0228	17.9736	-30.197	15.7	242
D357 St. 1	Tierney and Tingley 2015	0.3988	0.0759	0.0503	0.0078	0.4456	0.0217	17.0363	-34.6213	17.9	2620
D357 St. 11	Tierney and Tingley 2015	0.3716	0.0713	0.0544	0.0088	0.4631	0.0307	7.6704	-39.2945	12.8	5269
D357 St. 13	Tierney and Tingley 2015	0.399	0.0399	0.0267	0.005	0.516	0.0133	17.5695	-34.3878	17.9	1168
D357 St. 3	Tierney and Tingley 2015	0.3508	0.0783	0.0623	0.0086	0.4705	0.0295	13.1091	-36.4956	18	4900
D357 St. 6	Tierney and Tingley 2015	0.412	0.0783	0.0462	0.0044	0.4412	0.018	0.9075	-40.0032	11.3	4928
D357 St. 8	Tierney and Tingley 2015	0.3792	0.0549	0.0283	0.0069	0.5121	0.0186	17.9736	-34.3263	17.9	733
DNT05-22 BEN	Tierney and Tingley 2015	0.4634	0.0432	0.0123	0.005	0.4733	0.0029	-58.712	46.621	6.3	18
Drammensfjord D0-5	Tierney and Tingley 2015	0.4901	0.0251	0.0099	0.0035	0.467	0.0043	10.423	59.633	9.1	100
Drammensfjord-1	Tierney and Tingley 2015	0.4948	0.0346	0.0172	0.004	0.4445	0.0049	10.396	59.668	9.1	100
Drammensfjord-2	Tierney and Tingley 2015	0.4901	0.0251	0.0099	0.0035	0.467	0.0043	10.423	59.633	9.1	110
ENAM9407	Tierney and Tingley 2015	0.528	0.0321	0.0098	0.0035	0.4216	0.0049	-4.032	62.956	8	2060
Frisian Front	Tierney and Tingley 2015	0.4632	0.0393	0.0171	0.0058	0.471	0.0034	4.5	53.7	10.6	34
G2-85 7 0-1	Tierney and Tingley 2015	0.242	0.0689	0.0672	0.0181	0.5573	0.0464	123.595	-9.003	28.1	-999
G2-85 pist 0-1	Tierney and Tingley 2015	0.2343	0.0718	0.072	0.0195	0.5564	0.0459	123.64	-8.99	28.1	-999
G2-9 box 0-1	Tierney and Tingley 2015	0.2236	0.0732	0.0777	0.0195	0.5465	0.0595	123.592	-9.343	28.1	2720
G2-9 trp 0-1	Tierney and Tingley 2015	0.2023	0.0696	0.0813	0.0179	0.5764	0.0524	123.592	-9.34	28.1	2720
G6-3 0-1	Tierney and Tingley 2015	0.2366	0.0663	0.0781	0.0148	0.5488	0.0553	117.193	-10.152	28.3	1182
GeoB10016-2	Tierney and Tingley 2015	0.2172	0.0643	0.0942	0.0177	0.5573	0.0494	96.66	1.597	28.7	1900
GeoB10026-2	Tierney and Tingley 2015	0.2074	0.0763	0.1012	0.0184	0.5411	0.0556	99.521	-0.944	28.7	1641
GeoB10032-1	Tierney and Tingley 2015	0.2145	0.0729	0.0941	0.0179	0.5477	0.053	99.681	-1.667	28.7	1758
GeoB10034-3	Tierney and Tingley 2015	0.2311	0.0734	0.0933	0.017	0.5364	0.0488	101.499	-4.165	28.2	995
GeoB10038-3	Tierney and Tingley 2015	0.2877	0.0702	0.0831	0.014	0.503	0.0419	103.246	-5.937	27.6	1891
GeoB10040-3	Tierney and Tingley 2015	0.2899	0.0724	0.0829	0.0143	0.4977	0.0427	102.859	-6.476	27.9	2605
GeoB10042-2	Tierney and Tingley 2015	0.2477	0.071	0.0803	0.0187	0.5368	0.0455	104.643	-7.113	28	2457
GeoB10701-4	Tierney and Tingley 2015	0.285	0.074	0.08	0.015	0.515	0.031	17.467	40	18.9	1186
GeoB10703-3	Tierney and Tingley 2015	0.356	0.054	0.04	0.01	0.509	0.03	17.742	40	18.9	277
GeoB10704-3	Tierney and Tingley 2015	0.356	0.062	0.038	0.013	0.521	0.01	17.833	40	18.9	219
GeoB10705-3	Tierney and Tingley 2015	0.354	0.062	0.039	0.011	0.525	0.009	17.913	39.853	18.9	128
GeoB10707-4	Tierney and Tingley 2015	0.295	0.064	0.064	0.011	0.54	0.026	17.583	39.783	18.9	1598
GeoB10708-3	Tierney and Tingley 2015	0.306	0.07	0.061	0.011	0.533	0.02	17.733	39.808	18.9	686
GeoB10709-4	Tierney and Tingley 2015	0.363	0.059	0.036	0.01	0.516	0.016	17.893	39.757	18.9	173
GeoB10710-4	Tierney and Tingley 2015	0.298	0.067	0.065	0.011	0.527	0.031	17.683	39.592	18.9	2040
GeoB10711-3	Tierney and Tingley 2015	0.293	0.073	0.067	0.014	0.52	0.035	17.8	39.683	18.9	1049
GeoB10712-3	Tierney and Tingley 2015	0.328	0.063	0.054	0.012	0.519	0.024	17.862	39.727	18.9	618
GeoB10713-3	Tierney and Tingley 2015	0.37	0.059	0.039	0.014	0.507	0.012	18.283	39.692	18.9	127
GeoB10714-3	Tierney and Tingley 2015	0.34	0.066	0.044	0.012	0.521	0.017	18.283	39.64	18.9	207
GeoB10715-3	Tierney and Tingley 2015	0.274	0.078	0.066	0.014	0.537	0.03	18.283	39.559	18.9	697
GeoB10716-3	Tierney and Tingley 2015	0.275	0.071	0.076	0.011	0.523	0.044	18.283	39.345	18.9	1328
GeoB10717-3	Tierney and Tingley 2015	0.359	0.063	0.036	0.013	0.524	0.005	18.08	39.742	18.9	96
GeoB10718-3	Tierney and Tingley 2015	0.347	0.066	0.039	0.013	0.525	0.01	18.058	39.693	18.9	219
GeoB10719-3	Tierney and Tingley 2015	0.302	0.068	0.055	0.013	0.528	0.034	18.042	39.653	18.9	616
GeoB10720-5	Tierney and Tingley 2015	0.253	0.095	0.087	0.012	0.503	0.051	17.978	39.507	18.9	1387
GeoB10721-3	Tierney and Tingley 2015	0.34	0.069	0.046	0.013	0.516	0.015	16.767	42.166	18.1	203
GeoB10722-3	Tierney and Tingley 2015	0.371	0.069	0.037	0.012	0.503	0.008	16.5	42.167	18.1	142
GeoB10723-3	Tierney and Tingley 2015	0.375	0.058	0.029	0.011	0.51	0.017	16	42.167	17.8	114
GeoB10724-3	Tierney and Tingley 2015	0.387	0.052	0.023	0.01	0.51	0.018	16.217	42.001	18.1	50
GeoB10725-3	Tierney and Tingley 2015	0.403	0.048	0.021	0.009	0.507	0.011	16.216	42.05	18.1	94
GeoB10726-3	Tierney and Tingley 2015	0.382	0.051	0.024	0.008	0.526	0.009	16.717	42	18.1	183
GeoB10727-3	Tierney and Tingley 2015	0.373	0.067	0.029	0.01	0.511	0.01	16.617	41.801	18.1	101
GeoB10728-3	Tierney and Tingley 2015	0.351	0.072	0.048	0.013	0.496	0.02	16.858	41.783	18.1	194
GeoB10729-4	Tierney and Tingley 2015	0.305	0.071	0.057	0.014	0.525	0.029	17.191	41.647	18.1	712
GeoB10730-3	Tierney and Tingley 2015	0.326	0.073	0.048	0.013	0.527	0.012	17.05	41.5	18.1	183
GeoB10731-3	Tierney and Tingley 2015	0.377	0.055	0.027	0.009	0.523	0.01	16.658	41.5	18.1	96
GeoB10732-3	Tierney and Tingley 2015	0.376	0.046	0.019	0.007	0.549	0.003	16.407	41.5	18.1	51
GeoB10733-3	Tierney and Tingley 2015	0.379	0.055	0.029	0.01	0.522	0.006	16.225	41.5	18.1	22
GeoB10734-3	Tierney and Tingley 2015	0.382	0.044	0.021	0.008	0.54	0.005	16.242	41.667	18.1	18
GeoB10735-3	Tierney and Tingley 2015	0.305	0.07	0.059	0.012	0.528	0.025	17.308	41.5	18.1	733
GeoB10736-3	Tierney and Tingley 2015	0.356	0.062	0.035	0.011	0.524	0.013	18.192	40.758	18.8	123
GeoB10737-3	Tierney and Tingley 2015	0.37	0.06	0.034	0.01	0.515	0.01	18.329	40.625	18.8	113
GeoB10738-3	Tierney and Tingley 2015	0.357	0.061	0.035	0.013	0.511	0.023	18.467	40.546	18.8	112
GeoB10739-3	Tierney and Tingley 2015	0.324	0.07	0.051	0.011	0.521	0.023	18.642	40.5	18.8	565
GeoB10740-3	Tierney and Tingley 2015	0.345	0.062	0.037	0.012	0.531	0.011	18.583	40.392	18.9	128
GeoB10741-3	Tierney and Tingley 2015	0.352	0.063	0.039	0.011	0.521	0.013	18.667	40.233	18.9	287
GeoB10742-3	Tierney and Tingley 2015	0.3	0.07	0.059	0.012	0.534	0.024	18.776	39.716	18.9	599
GeoB10743-3	Tierney and Tingley 2015	0.346	0.061	0.04	0.014	0.539	0	18.642	39.825	18.9	124
GeoB10744-3	Tierney and Tingley 2015	0.341	0.063	0.038	0.012	0.535	0.011	18.6	39.85	18.9	117
GeoB10746-3	Tierney and Tingley 2015	0.338	0.062	0.037	0.011	0.539	0.014	16.758	39.908	18.9	157
GeoB10747-3	Tierney and Tingley 2015	0.323	0.064	0.041	0.013	0.54	0.018	16.975	39.725	18.9	246
GeoB10748-3	Tierney and Tingley 2015	0.328	0.065	0.05	0.012	0.53	0.016	17.05	39.667	18.9	288
GeoB10749-3	Tierney and Tingley 2015	0.308	0.07	0.049	0.012	0.533	0.027	17.183	39.6	18.9	278
GeoB1501-1	Tierney and Tingley 2015	0.3144	0.0844	0.0815	0.0081	0.4764	0.0351	-32.012	-3.682	27.3	4258
GeoB1503-2	Tierney and Tingley 2015	0.3162	0.0822	0.0802	0.0082	0.4808	0.0323	-30.648	2.31	27.6	2298
GeoB1504-1	Tierney and Tingley 2015	0.3121	0.0806	0.0769	0.0082	0.4872	0.035	-31.287	2.288	27.5	2980
GeoB1506-1	Tierney and Tingley 2015	0.3076	0.0823	0.0772	0.0078	0.4888	0.0364	-35.182	2.205	27.6	4267
GeoB1515-2	Tierney and Tingley 2015	0.2972	0.0815	0.0797	0.0101	0.4949	0.0367	-43.665	4.238	27.6	3125
GeoB2022-3	Tierney and Tingley 2015	0.365	0.0852	0.0687	0.0081	0.4466	0.0263	-20.908	-34.435	18.6	4016
GeoB2102-1	Tierney and Tingley 2015	0.2721	0.0665	0.0771	0.0113	0.5377	0.0353	-41.2	-23.983	23.5	1805
GeoB2104-1	Tierney and Tingley 2015	0.2617	0.0694	0.0823	0.0114	0.5358	0.0394	-46.378	-27.29	23.7	1505
GeoB2105-3	Tierney and Tingley 2015	0.2664	0.0732	0.0655	0.0155	0.5539	0.0254	-46.738	-26.738	23.9	202
GeoB2106-1	Tierney and Tingley 2015	0.2959	0.0673	0.0659	0.0116	0.5305	0.0287	-46.497	-27.098	23.7	502
GeoB2107-5	Tierney and Tingley 2015	0.2723	0.0701	0.0783	0.0116	0.5336	0.034	-46.457	-27.18	23.7	1052
GeoB2108-1	Tierney and Tingley 2015	0.291	0.0743	0.0832	0.0112	0.5028	0.0375	-46.23	-27.487	23.7	1991
GeoB2110-1	Tierney and Tingley 2015	0.2828	0.0708	0.0856	0.0099	0.5122	0.0387	-45.522	-28.65	23.5	3003
GeoB2111-2	Tierney and Tingley 2015	0.2889	0.0728	0.0821	0.0091	0.5099	0.0373	-45.223	-29.112	22.8	3498
GeoB2112-1	Tierney and Tingley 2015	0.2884	0.0715	0.0768	0.0085	0.5167	0.038	-43.377	-29.135	22.1	4009
GeoB2124-1	Tierney and Tingley 2015	0.2759	0.0677	0.0842	0.0104	0.5269	0.0349	-39.56	-20.958	25.7	2003
GeoB2125-2	Tierney and Tingley 2015	0.275	0.0652	0.0749	0.0116	0.5395	0.0339	-39.857	-20.82	25.7	1542
GeoB2126-1	Tierney and Tingley 2015	0.2909	0.0713	0.0872	0.0114	0.5001	0.0391	-38.933	-21.27	25.5	2537
GeoB2130-1	Tierney and Tingley 2015	0.2993	0.0748	0.0931	0.0179	0.4775	0.0375	-37.103	-20.615	26	2113
GeoB2201-1	Tierney and Tingley 2015	0.2506	0.0651	0.086	0.0175	0.5453	0.0355	-34.463	-8.168	27.3	794
GeoB2202-5	Tierney and Tingley 2015	0.2394	0.0902	0.1557	0.017	0.4646	0.0331	-34.263	-8.197	27.3	1128
GeoB2205-4	Tierney and Tingley 2015	0.2596	0.073	0.0907	0.0098	0.5291	0.0378	-34.345	-8.573	27.3	1790
GeoB2206-1	Tierney and Tingley 2015	0.2633	0.0712	0.0948	0.0125	0.5182	0.0399	-34.48	-8.558	27.3	1442
GeoB2207-2	Tierney and Tingley 2015	0.2739	0.0812	0.0915	0.0084	0.5085	0.0365	-34.135	-8.735	27.3	2585
GeoB2208-1	Tierney and Tingley 2015	0.3274	0.082	0.0749	0.0062	0.4784	0.0311	-33.7	-8.917	27.3	3977
GeoB2212-1	Tierney and Tingley 2015	0.3427	0.0851	0.0742	0.006	0.4574	0.0346	-25.623	-4.032	26.7	5521
GeoB2213-1	Tierney and Tingley 2015	0.3134	0.0815	0.0733	0.0072	0.4908	0.0339	-24.153	-1.265	26.6	4323
GeoB2215-8	Tierney and Tingley 2015	0.3102	0.0802	0.0721	0.008	0.4944	0.035	-23.492	0.008	26.7	3712
GeoB2216-2	Tierney and Tingley 2015	0.2957	0.0806	0.0734	0.0076	0.5073	0.0353	-23.102	0	26.5	3914
GeoB2701-4	Tierney and Tingley 2015	0.4195	0.0191	0.0068	0.0027	0.5476	0.0043	-53.982	-37.207	16.5	1007
GeoB2703-7	Tierney and Tingley 2015	0.4874	0.0398	0.0176	0.0039	0.4446	0.0068	-54.202	-38.513	12.4	1162
GeoB2705-7	Tierney and Tingley 2015	0.4707	0.0557	0.0293	0.0046	0.4292	0.0106	-53.363	-39.243	14.6	4474
GeoB2706-6	Tierney and Tingley 2015	0.4808	0.0622	0.0283	0.0039	0.4142	0.0107	-55.535	-42.368	11.2	4700
GeoB2707-4	Tierney and Tingley 2015	0.499	0.0543	0.022	0.0032	0.414	0.0075	-56.323	-41.945	9.3	3167
GeoB2708-5	Tierney and Tingley 2015	0.4296	0.0198	0.0067	0.0026	0.5367	0.0045	-57.3	-41.418	9	392
GeoB2712-1	Tierney and Tingley 2015	0.5234	0.041	0.0151	0.0031	0.4127	0.0047	-59.33	-43.675	9.7	1228
GeoB2714-5	Tierney and Tingley 2015	0.4995	0.0566	0.0223	0.0032	0.4111	0.0073	-57.997	-43.863	9.9	2361
GeoB2715-1	Tierney and Tingley 2015	0.5117	0.0607	0.0291	0.0035	0.3875	0.0074	-57.662	-43.903	9.9	3280
GeoB2717-8	Tierney and Tingley 2015	0.4928	0.0606	0.0248	0.0032	0.4093	0.0094	-56.487	-47.162	8.7	4479
GeoB2718-1	Tierney and Tingley 2015	0.4872	0.0603	0.0261	0.0035	0.4151	0.0077	-58.175	-47.307	7.7	2990
GeoB2719-3	Tierney and Tingley 2015	0.5404	0.0342	0.011	0.003	0.4074	0.004	-60.093	-47.442	8.2	684
GeoB2722-2	Tierney and Tingley 2015	0.5004	0.0613	0.0291	0.0035	0.3992	0.0065	-58.62	-47.327	7.7	2351
GeoB2723-2	Tierney and Tingley 2015	0.5261	0.0325	0.0108	0.0031	0.4232	0.0044	-57.875	-48.912	7.3	569
GeoB2724-7	Tierney and Tingley 2015	0.4948	0.0636	0.0262	0.0032	0.4035	0.0087	-56.175	-47.963	8.7	4799
GeoB2727-1	Tierney and Tingley 2015	0.4921	0.0592	0.0243	0.0035	0.413	0.008	-56.538	-48.013	7	2803
GeoB2730-1	Tierney and Tingley 2015	0.4738	0.0557	0.0254	0.0035	0.4314	0.0102	-53.248	-44.475	12.4	5817
GeoB2731-1	Tierney and Tingley 2015	0.4615	0.0566	0.0267	0.004	0.4393	0.012	-51.423	-44.207	13.2	5691
GeoB2734-2	Tierney and Tingley 2015	0.4995	0.0472	0.0191	0.0032	0.4247	0.0063	-54.342	-39.29	11.3	2272
GeoB2802-2	Tierney and Tingley 2015	0.4961	0.0324	0.014	0.0034	0.4481	0.006	-55.015	-37.807	13.3	576
GeoB2803-1	Tierney and Tingley 2015	0.4737	0.0377	0.0183	0.0039	0.4586	0.0078	-53.703	-37.407	16.5	1162
GeoB2804-2	Tierney and Tingley 2015	0.4645	0.0421	0.0229	0.0042	0.4577	0.0087	-53.537	-37.537	16.5	1836
GeoB2805-1	Tierney and Tingley 2015	0.4531	0.0447	0.0249	0.0043	0.4629	0.0101	-53.443	-37.605	16.5	2743
GeoB2806-6	Tierney and Tingley 2015	0.4456	0.0491	0.0308	0.0052	0.4567	0.0126	-53.137	-37.832	16.5	3542
GeoB2809-2	Tierney and Tingley 2015	0.4045	0.0532	0.0395	0.0061	0.4803	0.0163	-51.522	-36.332	19.6	3539
GeoB2810-2	Tierney and Tingley 2015	0.3929	0.0493	0.0382	0.0065	0.4964	0.0166	-51.978	-35.98	19.7	2909
GeoB2811-1	Tierney and Tingley 2015	0.4131	0.0395	0.0261	0.0052	0.5033	0.0128	-52.27	-35.753	17.1	1789
GeoB2812-3	Tierney and Tingley 2015	0.4058	0.0261	0.0137	0.0038	0.5438	0.0069	-52.387	-35.602	17.1	1041
GeoB2813-1	Tierney and Tingley 2015	0.4318	0.0238	0.011	0.0037	0.5242	0.0056	-52.562	-35.532	17.1	508
GeoB2817-3	Tierney and Tingley 2015	0.3201	0.0763	0.0744	0.0077	0.4886	0.0329	-40.97	-31.902	20.6	3959
GeoB2818-1	Tierney and Tingley 2015	0.314	0.077	0.078	0.008	0.4916	0.0314	-38.17	-30.873	22	3110
GeoB2819-2	Tierney and Tingley 2015	0.3167	0.0783	0.0765	0.0089	0.4847	0.0349	-38.343	-30.848	22	3435
GeoB2820-1	Tierney and Tingley 2015	0.3145	0.0813	0.0815	0.0078	0.4836	0.0312	-38.438	-30.822	22	3606
GeoB2821-2	Tierney and Tingley 2015	0.3173	0.0785	0.0759	0.0079	0.4876	0.0328	-38.817	-30.453	22	3936
GeoB2824-1	Tierney and Tingley 2015	0.3785	0.0674	0.0502	0.0068	0.4759	0.0212	-42.498	-33.498	20.4	4512
GeoB2825-3	Tierney and Tingley 2015	0.3717	0.0665	0.0514	0.0071	0.4784	0.0249	-41.432	-32.5	20.2	4352
GeoB2826-1	Tierney and Tingley 2015	0.3309	0.0693	0.0657	0.0081	0.4953	0.0307	-38.073	-30.915	22	2943
GeoB2827-2	Tierney and Tingley 2015	0.3176	0.0737	0.0723	0.0078	0.494	0.0346	-40.728	-31.478	20.6	3702
GeoB2828-1	Tierney and Tingley 2015	0.3088	0.075	0.0745	0.0079	0.5013	0.0325	-40.718	-31.475	20.6	3741
GeoB2829-3	Tierney and Tingley 2015	0.3037	0.0736	0.0781	0.0087	0.5005	0.0354	-43.43	-30.873	21	3523
GeoB2830-1	Tierney and Tingley 2015	0.2946	0.0728	0.0808	0.0081	0.5072	0.0364	-44	-29.02	21.9	3815
GeoB6402-9	Tierney and Tingley 2015	0.4372	0.0705	0.0388	0.0065	0.4328	0.0142	-22.757	-39.743	14.1	3878
GeoB6404-3	Tierney and Tingley 2015	0.4527	0.0684	0.0332	0.0047	0.4286	0.0123	-23.465	-41.506	13	4223
GeoB6405-8	Tierney and Tingley 2015	0.4499	0.0674	0.0338	0.0051	0.429	0.0148	-21.853	-42	13.6	3863
GeoB6406-1	Tierney and Tingley 2015	0.4576	0.0699	0.0346	0.005	0.4212	0.0117	-20.784	-42	11.3	3514
GeoB6407-2	Tierney and Tingley 2015	0.471	0.0684	0.0312	0.0043	0.4148	0.0103	-19.5	-42.045	11.5	3384
GeoB6408-3	Tierney and Tingley 2015	0.4704	0.0667	0.0294	0.0042	0.4186	0.0106	-20.441	-43.614	10.5	3797
GeoB6409-2	Tierney and Tingley 2015	0.5015	0.0642	0.0262	0.0034	0.3966	0.0081	-21.717	-44.507	9.6	4296
GeoB6409-3	Tierney and Tingley 2015	0.4709	0.0599	0.0316	0.0054	0.4166	0.0156	-21.717	-44.507	9.6	4296
GeoB6410-1	Tierney and Tingley 2015	0.4789	0.0648	0.0274	0.0034	0.4164	0.0091	-20.9	-44.517	9.8	4038
GeoB6412-1	Tierney and Tingley 2015	0.4968	0.057	0.0255	0.004	0.408	0.0087	-17.647	-44.254	9.4	3475
GeoB6413-4	Tierney and Tingley 2015	0.4786	0.0627	0.0271	0.0038	0.4189	0.009	-17.34	-44.207	9.4	3768
GeoB6414-1	Tierney and Tingley 2015	0.4871	0.0637	0.0288	0.0037	0.4077	0.0092	-13.07	-43.999	11	3830
GeoB6416-2	Tierney and Tingley 2015	0.4519	0.0693	0.0381	0.0059	0.4209	0.0138	-18.163	-39.955	13.4	3525
GeoB6417-2	Tierney and Tingley 2015	0.4224	0.0719	0.0401	0.0063	0.4443	0.015	-21.042	-39.093	14.2	4024
GeoB6418-3	Tierney and Tingley 2015	0.4194	0.0723	0.0417	0.0068	0.443	0.0169	-21.535	-38.427	13.3	4126
GeoB6419-1	Tierney and Tingley 2015	0.4392	0.0685	0.0436	0.009	0.4231	0.0166	-21.864	-37.774	18.5	3568
GeoB6420-2	Tierney and Tingley 2015	0.3929	0.0761	0.0488	0.0072	0.4567	0.0182	-22.148	-37.158	17.5	3998
GeoB6421-1	Tierney and Tingley 2015	0.3914	0.0745	0.0493	0.0083	0.4551	0.0214	-22.445	-36.448	16.4	4216
GeoB6422-5	Tierney and Tingley 2015	0.3763	0.0795	0.0581	0.0088	0.4554	0.0218	-22.733	-35.707	18.6	3972
GeoB6423-1	Tierney and Tingley 2015	0.3667	0.0766	0.057	0.009	0.4665	0.0241	-22.992	-35.253	18.6	3963
GeoB6424-2	Tierney and Tingley 2015	0.3562	0.077	0.0589	0.009	0.4729	0.0259	-23.276	-34.608	18.2	3820
GeoB6425-1	Tierney and Tingley 2015	0.3454	0.0798	0.0652	0.0086	0.4724	0.0286	-23.588	-33.825	19.7	4352
GeoB6426-2	Tierney and Tingley 2015	0.3397	0.0777	0.0655	0.0074	0.4826	0.0271	-24.024	-33.499	20	4381
GeoB6427-1	Tierney and Tingley 2015	0.3413	0.0762	0.0674	0.0072	0.4804	0.0274	-24.248	-33.182	20	4491
GeoB6428-3	Tierney and Tingley 2015	0.3272	0.0776	0.0693	0.0075	0.4883	0.0301	-24.248	-32.51	20.5	4022
GeoB6429-1	Tierney and Tingley 2015	0.2985	0.0751	0.0714	0.0113	0.5087	0.0351	-24.248	-31.95	21.4	4335
GeoB8301-5	Tierney and Tingley 2015	0.5178	0.0769	0.0496	0.0077	0.3303	0.0177	17.699	-34.775	17.9	1941
GeoB8303-5	Tierney and Tingley 2015	0.4635	0.0758	0.0502	0.0072	0.386	0.0173	16.785	-34.261	18.4	3447
GeoB8305-1	Tierney and Tingley 2015	0.4954	0.0649	0.0382	0.0068	0.3808	0.0138	17.177	-33.478	16	712
GeoB8306-1	Tierney and Tingley 2015	0.4806	0.0709	0.045	0.0071	0.381	0.0154	16.843	-33.741	18.1	1924
GeoB8307-5	Tierney and Tingley 2015	0.4551	0.0748	0.0494	0.0076	0.3951	0.0181	16.5	-33.834	18.1	2668
GeoB8308-2	Tierney and Tingley 2015	0.4523	0.078	0.053	0.0078	0.3906	0.0184	16.268	-33.92	18.1	3162
GeoB8310-1	Tierney and Tingley 2015	0.5038	0.0694	0.0417	0.007	0.3616	0.0165	16.382	-32.909	17.1	1995
GeoB8311-1	Tierney and Tingley 2015	0.492	0.0705	0.0454	0.0073	0.3674	0.0174	16.31	-32.365	17.1	2535
GeoB8313-1	Tierney and Tingley 2015	0.489	0.0726	0.0439	0.0073	0.3714	0.0157	15.944	-32.123	18.1	1090
GeoB8314-1	Tierney and Tingley 2015	0.496	0.0763	0.0457	0.0075	0.3585	0.016	15.813	-32.499	18.1	1977
GeoB8315-5	Tierney and Tingley 2015	0.463	0.0748	0.0507	0.0074	0.386	0.0181	15.695	-32.888	18.1	2996
GeoB8316-1	Tierney and Tingley 2015	0.4617	0.0768	0.0512	0.0074	0.3849	0.018	15.734	-32.74	18.1	2667
GeoB8317-1	Tierney and Tingley 2015	0.4508	0.0787	0.054	0.008	0.3891	0.0193	15.163	-32.329	18.1	2930
GeoB8318-1	Tierney and Tingley 2015	0.5819	0.0569	0.0244	0.0064	0.3203	0.0101	16.805	-32.152	17.1	307
GeoB8319-1	Tierney and Tingley 2015	0.5377	0.0359	0.015	0.0043	0.4024	0.0047	18.078	-32.496	14.9	69
GeoB8321-1	Tierney and Tingley 2015	0.5166	0.0393	0.0166	0.0045	0.4168	0.0062	18.117	-31.864	14.8	104
GeoB8322-1	Tierney and Tingley 2015	0.5209	0.0397	0.0165	0.0045	0.4129	0.0055	18.118	-31.954	14.8	105
GeoB8323-1	Tierney and Tingley 2015	0.5214	0.0378	0.0162	0.0046	0.4146	0.0055	18.222	-32.032	14.9	90
GeoB8324-1	Tierney and Tingley 2015	0.5263	0.04	0.0168	0.0048	0.406	0.0061	18.091	-31.747	14.8	100
GeoB8325-1	Tierney and Tingley 2015	0.5753	0.044	0.0186	0.0044	0.3512	0.0066	17.279	-30.595	15.7	134
GeoB8327-1	Tierney and Tingley 2015	0.5359	0.0411	0.0185	0.0049	0.3932	0.0063	17.007	-29.703	13.7	88
GeoB8328-1	Tierney and Tingley 2015	0.5259	0.0407	0.0177	0.0048	0.405	0.0059	17.058	-29.939	13.7	112
GeoB8329-1	Tierney and Tingley 2015	0.525	0.0403	0.0181	0.0049	0.4058	0.006	17.034	-29.928	13.7	111
GeoB8331-2	Tierney and Tingley 2015	0.5886	0.041	0.0156	0.005	0.3431	0.0066	15.9	80.5	0.9	350
GeoB8332-3	Tierney and Tingley 2015	0.5453	0.0395	0.0181	0.0052	0.3862	0.0058	16.66	-29.127	13.7	117
GeoB8333-1	Tierney and Tingley 2015	0.5575	0.0417	0.0182	0.0051	0.3713	0.0062	16.615	-29.122	13.7	20
GeoB8336-5	Tierney and Tingley 2015	0.4428	0.0903	0.06	0.0067	0.381	0.0192	12.344	-29.21	18.4	3626
GeoB8337-5	Tierney and Tingley 2015	0.4499	0.0844	0.0572	0.0069	0.3833	0.0183	13.178	-29.408	18	3079
GeoB8338-1	Tierney and Tingley 2015	0.4964	0.0737	0.042	0.0061	0.3665	0.0153	14.322	-29.5	17.2	915
GeoB8340-1	Tierney and Tingley 2015	0.4507	0.0713	0.042	0.0073	0.4137	0.015	14.825	-30.317	17.8	600
GeoB8342-5	Tierney and Tingley 2015	0.4297	0.0832	0.0607	0.0082	0.397	0.0212	13.001	-31.501	18.2	3521
GeoB8343-1	Tierney and Tingley 2015	0.4232	0.0835	0.0577	0.0079	0.4071	0.0206	13.325	-30.849	18.3	3089
GeoB9501-4	Tierney and Tingley 2015	0.3176	0.0607	0.0439	0.0161	0.5458	0.016	-16.733	16.843	23.5	330
GeoB9506-3	Tierney and Tingley 2015	0.3451	0.0751	0.0692	0.0088	0.4698	0.0321	-18.35	15.61	24.1	2964
GeoB9508-4	Tierney and Tingley 2015	0.3368	0.0779	0.0718	0.0091	0.4736	0.0308	-17.948	15.498	23.4	2385
GeoB9510-3	Tierney and Tingley 2015	0.3357	0.0793	0.0685	0.0101	0.477	0.0293	-17.653	15.417	23.4	1567
GeoB9512-4	Tierney and Tingley 2015	0.3142	0.0702	0.0583	0.0124	0.5157	0.0291	-17.485	15.376	23.4	787
GeoB9513-5	Tierney and Tingley 2015	0.3251	0.0702	0.0576	0.014	0.5073	0.0258	-17.294	15.318	23.4	498
GeoB9520-4	Tierney and Tingley 2015	0.3135	0.0754	0.0637	0.011	0.5069	0.0294	-17.591	13.829	24.2	1102
GeoB9521-3	Tierney and Tingley 2015	0.3131	0.0684	0.0579	0.0144	0.5216	0.0246	-17.49	13.849	24.2	522
GeoB9525-5	Tierney and Tingley 2015	0.3329	0.0805	0.0738	0.0111	0.4726	0.0291	-17.88	12.64	24.8	2648
GeoB9526-4	Tierney and Tingley 2015	0.3381	0.0776	0.0738	0.0099	0.4704	0.0302	-18.056	12.435	25.3	3223
GeoB9528-1	Tierney and Tingley 2015	0.3225	0.0798	0.0785	0.0074	0.4752	0.0366	-17.664	9.166	27	3053
GeoB9529-1	Tierney and Tingley 2015	0.3296	0.0797	0.0796	0.0085	0.4682	0.0344	-17.369	8.352	27.4	1234
GeoB9534-4	Tierney and Tingley 2015	0.2958	0.0721	0.072	0.0135	0.5176	0.0289	-14.936	8.901	27.3	493
GeoB9535-5	Tierney and Tingley 2015	0.3009	0.0741	0.0743	0.0124	0.5081	0.0302	-14.961	8.876	27.3	666
Gullmarsfjord	Tierney and Tingley 2015	0.4317	0.0237	0.0086	0.0037	0.5291	0.0032	11.5	58.333	9.1	110
HB-4	Tierney and Tingley 2015	0.5356	0.0273	0.0113	0.0038	0.4192	0.0028	-87.712	60.621	6.3	205
HB-5	Tierney and Tingley 2015	0.4967	0.0204	0.0049	0.0025	0.4724	0.003	-90.712	60.621	5.3	128
HB-6	Tierney and Tingley 2015	0.5002	0.0145	0.0045	0.0026	0.4763	0.0019	-91.712	60.621	6.8	120
HON02-015 BEN	Tierney and Tingley 2015	0.4966	0.0389	0.0141	0.0031	0.4427	0.0046	-63.712	49.621	5.5	395
HQ08-48PC	Tierney and Tingley 2015	0.2286	0.0575	0.0696	0.01	0.592	0.0424	110.53	16.96	27	1474
IK9307-3	Tierney and Tingley 2015	0.411	0.0211	0.0129	0.0074	0.5408	0.0067	131.297	72.55	3	21
IK9316-6	Tierney and Tingley 2015	0.4342	0.0204	0.0108	0.0066	0.5223	0.0058	131.502	73.0017	2.1	28
IK9318-5	Tierney and Tingley 2015	0.4585	0.0279	0.0099	0.0061	0.4928	0.0049	137.552	73.4967	0.9	24
IK9327-6	Tierney and Tingley 2015	0.4927	0.0209	0.0064	0.0047	0.4715	0.0038	119.86	73.9983	2.2	30
IK9330-5	Tierney and Tingley 2015	0.485	0.0217	0.0062	0.0045	0.4782	0.0043	127.503	74	3.3	27
IK9338-5	Tierney and Tingley 2015	0.5038	0.021	0.005	0.0045	0.4619	0.0038	119.955	74.4917	1.9	34
IK9340-GKG	Tierney and Tingley 2015	0.5333	0.0235	0.0113	0.0054	0.4217	0.0049	122.993	74.5	2.8	16
IK9342-6	Tierney and Tingley 2015	0.5001	0.0218	0.0057	0.0042	0.4641	0.0041	127.348	74.51	3.3	34
IK9350-6	Tierney and Tingley 2015	0.4486	0.0225	0.0088	0.0053	0.5105	0.0044	136.03	75.01	1.2	31
IK9356-2	Tierney and Tingley 2015	0.4491	0.018	0.0052	0.0044	0.5183	0.0049	123.015	74.9967	3.2	33
IK9367-2	Tierney and Tingley 2015	0.4537	0.0191	0.0055	0.0045	0.5133	0.0038	123.842	75.4817	3.2	44
IK9373A-6	Tierney and Tingley 2015	0.4853	0.0203	0.0072	0.0043	0.4789	0.004	134.583	75.81	0.1	46
IK93Z2-8	Tierney and Tingley 2015	0.4966	0.0462	0.0365	0.019	0.391	0.0107	113.997	73.6667	2.6	9
IK93Z3-2	Tierney and Tingley 2015	0.4731	0.0348	0.0166	0.012	0.4559	0.0076	119.828	73.2917	2.2	12
IK93Z4-4	Tierney and Tingley 2015	0.4658	0.0428	0.0191	0.0154	0.449	0.0079	130.127	72.0333	2.9	14
IK93Z5-3	Tierney and Tingley 2015	0.5291	0.0357	0.0167	0.0102	0.4019	0.0063	137.007	71.69	2.4	11
IS-S1	Tierney and Tingley 2015	0.3757	0.0686	0.0575	0.0089	0.4677	0.0216	-9.852	48.062	13.4	2006
IS-S2	Tierney and Tingley 2015	0.3909	0.0662	0.0486	0.0098	0.4662	0.0184	-9.707	48.178	13.4	1035
IS-S3	Tierney and Tingley 2015	0.4116	0.0678	0.0427	0.0106	0.4525	0.0147	-9.709	48.267	13.4	497
IS-S4	Tierney and Tingley 2015	0.4635	0.0373	0.0127	0.0049	0.4779	0.0037	-6.099	51.218	11.9	106
IS-S5	Tierney and Tingley 2015	0.4588	0.0345	0.0103	0.0038	0.4891	0.0036	-5.593	53.883	10.8	104
IS-S6	Tierney and Tingley 2015	0.4886	0.0279	0.0087	0.0037	0.4686	0.0025	-5.584	54.119	10.8	54
KH01-3 St. 01	Tierney and Tingley 2015	0.384	0.059	0.047	0.004	0.494	0.013	-160	0	27.6	5142
KH01-3 St. 08	Tierney and Tingley 2015	0.388	0.056	0.043	0.003	0.494	0.015	-160	-35	17.6	5098
KH01-3 St. 10	Tierney and Tingley 2015	0.251	0.051	0.063	0.006	0.586	0.042	-160	-47	11.1	5118
KH01-3 St. 17	Tierney and Tingley 2015	0.365	0.058	0.051	0.003	0.498	0.024	140	-60	0.9	4483
KH01-3 St. 19	Tierney and Tingley 2015	0.34	0.063	0.059	0.007	0.506	0.026	140	-50	7.7	3755
KH03-1 HY03	Tierney and Tingley 2015	0.345	0.067	0.063	0.006	0.49	0.031	-94.95	8.0333	27.7	3661
KH03-1 HY04	Tierney and Tingley 2015	0.34	0.062	0.061	0.005	0.503	0.029	-95.05	4.0333	27.5	3563
KH03-1 HY05	Tierney and Tingley 2015	0.224	0.06	0.066	0.007	0.598	0.045	-95.5	2.0167	26.3	2886
KH03-1 HY06	Tierney and Tingley 2015	0.342	0.066	0.059	0.006	0.499	0.029	-95.4333	0.0167	23.8	3246
KH03-1 HY07	Tierney and Tingley 2015	0.359	0.068	0.062	0.004	0.48	0.026	-95	-2.0333	23	3331
KH03-1 HY08	Tierney and Tingley 2015	0.369	0.062	0.055	0.006	0.482	0.027	-95	-3.9667	24.2	3657
KH03-1 HY08B	Tierney and Tingley 2015	0.344	0.071	0.069	0.004	0.481	0.032	-94.9167	-5.95	24.4	3852
KH03-1 HY09	Tierney and Tingley 2015	0.23	0.045	0.067	0.007	0.603	0.047	-95.0167	-7.9833	24.3	3910
KH04-5 SX02	Tierney and Tingley 2015	0.548	0.041	0.012	0.002	0.392	0.005	157.517	-0.6667	29.3	2098
KH04-5 SX09	Tierney and Tingley 2015	0.543	0.031	0.009	0.002	0.41	0.005	174.2	-65.15	-0.2	3393
KH04-5 SX10	Tierney and Tingley 2015	0.54	0.042	0.014	0.002	0.396	0.007	-172.65	-67.2167	0.2	3884
KH04-5 SX14	Tierney and Tingley 2015	0.432	0.046	0.025	0.003	0.484	0.011	-170	-50.0167	9.8	5388
KH04-5 SX15	Tierney and Tingley 2015	0.452	0.049	0.025	0.002	0.462	0.009	-170	-45	12.6	5165
KH04-5 SX16	Tierney and Tingley 2015	0.426	0.053	0.028	0.003	0.479	0.011	-171	-43.1833	14.1	2313
KH04-5 SX17	Tierney and Tingley 2015	0.419	0.055	0.033	0.003	0.479	0.011	-170	-40	15.5	4635
LMG0404-16	Tierney and Tingley 2015	0.4703	0.012	0.004	0.0027	0.5084	0.0026	11.383	79.012	1.9	380
LMG0404-3	Tierney and Tingley 2015	0.4576	0.0125	0.0041	0.0029	0.5203	0.0026	-55.313	-63.136	-1.1	758
LMG0502-25	Tierney and Tingley 2015	0.5037	0.0126	0.0036	0.0022	0.4754	0.0025	-60.383	-64.797	-1.3	861
LMG9802-6	Tierney and Tingley 2015	0.5221	0.0248	0.0067	0.0019	0.4411	0.0034	-66.884	-67.216	-0.8	650
M2003-01	Tierney and Tingley 2015	0.5262	0.0368	0.013	0.0039	0.4145	0.0056	-1.966	62.001	8.6	1602
M2003-06	Tierney and Tingley 2015	0.5312	0.0328	0.0107	0.0035	0.4165	0.0052	29.553	74.146	3.8	366
M2003-08	Tierney and Tingley 2015	0.5303	0.0337	0.0109	0.0036	0.4167	0.0048	-1.125	62.767	8.6	1601
MC-1	Tierney and Tingley 2015	0.4821	0.0394	0.0176	0.0041	0.4511	0.0056	141.546	41.3	12.1	1002
MC-3	Tierney and Tingley 2015	0.5328	0.0367	0.0108	0.0039	0.4104	0.0053	138.597	41.251	12.8	1268
MC3K	Tierney and Tingley 2015	0.2393	0.0721	0.0885	0.0128	0.5367	0.0506	-90.3	27.5	25.4	1100
MC4R	Tierney and Tingley 2015	0.2369	0.0699	0.0854	0.012	0.5491	0.0468	-90.3	27.5	25.4	1100
MC4S	Tierney and Tingley 2015	0.2264	0.0747	0.0959	0.0125	0.537	0.0534	-90.3	27.5	25.4	1100
MC-6	Tierney and Tingley 2015	0.5283	0.0365	0.0133	0.0051	0.4123	0.0045	139.211	39.32	15.5	856
MD03-2601	Tierney and Tingley 2015	0.5824	0.0179	0.006	0.0034	0.3882	0.0021	138.557	-66.051	-0.4	750
MD03-2603	Tierney and Tingley 2015	0.5319	0.0361	0.0116	0.0027	0.411	0.0068	139.375	-64.285	-0.2	3331
MD03-2604	Tierney and Tingley 2015	0.565	0.0373	0.0123	0.0025	0.376	0.0068	139.375	-64.285	-0.2	3331
MD05-2894	Tierney and Tingley 2015	0.1637	0.0535	0.0787	0.0142	0.6414	0.0485	111.55	7.04	28.2	1982
MD05-2896	Tierney and Tingley 2015	0.2178	0.0587	0.0804	0.0098	0.5938	0.0395	111.441	8.825	28.5	1657
MD05-2898	Tierney and Tingley 2015	0.2218	0.0617	0.0802	0.0115	0.5795	0.0453	112.18	13.79	27.7	2395
MD05-2900	Tierney and Tingley 2015	0.2101	0.0603	0.0768	0.0116	0.5949	0.0464	110.7	14.39	27.1	1455
MD05-2902	Tierney and Tingley 2015	0.1999	0.0616	0.0812	0.0109	0.5964	0.0501	114.96	17.96	27.3	3697
MD05-2903	Tierney and Tingley 2015	0.217	0.0631	0.0781	0.0121	0.5811	0.0487	116.25	19.46	26.6	2066
MD05-2905	Tierney and Tingley 2015	0.2086	0.0621	0.0772	0.0124	0.5913	0.0484	117.36	20.14	26.4	1647
Mokbaai	Tierney and Tingley 2015	0.5122	0.0476	0.0209	0.0099	0.4059	0.0036	4.083	53	10.6	5
MW91-9 BC-22	Tierney and Tingley 2015	0.226	0.0658	0.0848	0.013	0.5469	0.0635	160.4	0	29.5	2965
MW91-9 BC-37	Tierney and Tingley 2015	0.2251	0.066	0.0816	0.0125	0.5547	0.06	157.8	-0.98	29.3	2022
MW91-9 BC-51	Tierney and Tingley 2015	0.2314	0.0633	0.082	0.0125	0.5509	0.06	161	0	29.5	3397
MW91-9 BC-58	Tierney and Tingley 2015	0.2393	0.0656	0.0806	0.0119	0.5432	0.0593	162.2	0	29.5	4329
MW91-9 BC-74	Tierney and Tingley 2015	0.2276	0.0662	0.0809	0.0116	0.5541	0.0596	162.6	0	29.5	4445
MW91-9 GGC-12	Tierney and Tingley 2015	0.2398	0.0678	0.084	0.0125	0.5334	0.0626	157.9	-1	29.3	2018
MW91-9 GGC-15	Tierney and Tingley 2015	0.2441	0.0681	0.0826	0.0128	0.5326	0.0598	158.9	0	29.3	2311
MW91-9 GGC-18	Tierney and Tingley 2015	0.2341	0.0653	0.0844	0.013	0.5413	0.0619	160.5	0	29.5	2980
MW91-9 GGC-29	Tierney and Tingley 2015	0.2248	0.0656	0.0802	0.012	0.5547	0.0627	158.9	0	29.3	2322
MW91-9 GGC-38	Tierney and Tingley 2015	0.2802	0.0634	0.0791	0.0123	0.5097	0.0553	159.4	0	29.4	2456
MW91-9 GGC-44	Tierney and Tingley 2015	0.2411	0.0633	0.0804	0.0121	0.5427	0.0604	160.6	0	29.5	3160
MW91-9 GGC-55	Tierney and Tingley 2015	0.2348	0.0652	0.077	0.0117	0.5485	0.0627	161.8	0	29.6	4025
MW91-9 GGC-6	Tierney and Tingley 2015	0.2508	0.0671	0.0871	0.0117	0.5258	0.0576	156.99	-2.3	29.3	1618
MW91-9 GGC-68	Tierney and Tingley 2015	0.2557	0.0638	0.076	0.0115	0.5319	0.0611	162.7	0	29.5	4449
MW91-9 GGC-8	Tierney and Tingley 2015	0.2441	0.0678	0.0861	0.0125	0.533	0.0564	156.9	-2.2	29.3	1625
NBP0003-1	Tierney and Tingley 2015	0.5002	0.0137	0.0038	0.002	0.4774	0.0028	-58.578	-64.294	-1.3	768
NBP0003-28	Tierney and Tingley 2015	0.4931	0.0146	0.0044	0.0021	0.4821	0.0037	-58.516	-64.367	-1.3	794
NBP0003-29	Tierney and Tingley 2015	0.502	0.0131	0.0037	0.002	0.4784	0.0008	-58.444	-64.356	-1.3	690
NBP0003-30	Tierney and Tingley 2015	0.5082	0.0122	0.0034	0.002	0.4719	0.0023	-58.45	-64.281	-1.3	843
NBP0107 JPC33	Tierney and Tingley 2015	0.541	0.0234	0.0068	0.0024	0.4237	0.0027	-61.491	-63.135	0	704
NBP0107-17	Tierney and Tingley 2015	0.4461	0.0237	0.0067	0.0023	0.5167	0.0045	-65.401	-64.849	-0.2	657
NBP0107-28	Tierney and Tingley 2015	0.5435	0.017	0.0047	0.0021	0.4302	0.0025	-62.046	-64.317	0.4	1014
NBP0107-49	Tierney and Tingley 2015	0.4704	0.0121	0.0041	0.0026	0.5081	0.0027	-56.382	-63.667	-1.3	638
NBP0603-3	Tierney and Tingley 2015	0.5173	0.0162	0.0042	0.0017	0.4579	0.0028	-61.565	-65.768	-1.3	772
NBP0702-10	Tierney and Tingley 2015	0.5208	0.015	0.004	0.0018	0.4555	0.0029	-108.61	-74.1	-1.7	730
NBP0702-13	Tierney and Tingley 2015	0.5152	0.0206	0.0057	0.003	0.4527	0.0029	-134.52	-73.94	-1.8	470
NBP0702-15	Tierney and Tingley 2015	0.5056	0.0232	0.0064	0.0027	0.459	0.0032	-125.81	-72.56	-1.6	425
NBP0702-17	Tierney and Tingley 2015	0.531	0.0204	0.0056	0.0021	0.4378	0.0031	-114.99	-71.54	-1.8	424
NBP0702-20	Tierney and Tingley 2015	0.5164	0.0328	0.0097	0.0027	0.4341	0.0043	-106.01	-71.13	-1.8	512
NBP0702-22	Tierney and Tingley 2015	0.4778	0.0345	0.0113	0.003	0.4683	0.005	-104.01	-71.75	-1.8	665
NBP0702-3	Tierney and Tingley 2015	0.5414	0.0219	0.0068	0.0024	0.4248	0.0026	-158.27	-77.47	-0.9	1081
NBP9507-2	Tierney and Tingley 2015	0.4367	0.013	0.0038	0.0017	0.542	0.0027	-57.494	-62.208	-0.5	300
NBP9903-20	Tierney and Tingley 2015	0.4943	0.0148	0.0047	0.0024	0.4811	0.0028	-62.916	-64.844	-0.2	301
NBP9903-21	Tierney and Tingley 2015	0.5227	0.0161	0.005	0.0025	0.4512	0.0025	-62.976	-64.844	-0.2	282
NIOP 325	Tierney and Tingley 2015	0.2791	0.0729	0.0924	0.0108	0.4953	0.0495	53.55	10.683	26.6	4065
NIOP 902	Tierney and Tingley 2015	0.2249	0.062	0.0614	0.0165	0.5924	0.0428	51.577	10.779	26.1	459
NIOP 903	Tierney and Tingley 2015	0.2229	0.0675	0.0794	0.0166	0.5636	0.0501	51.658	10.783	26.1	789
NIOP 904	Tierney and Tingley 2015	0.2319	0.0693	0.0761	0.0138	0.5611	0.0477	51.771	10.788	26.1	1194
NIOP 905	Tierney and Tingley 2015	0.2466	0.0682	0.0852	0.0155	0.5313	0.0531	51.944	10.916	26.1	1567
NIOP 906	Tierney and Tingley 2015	0.2443	0.0636	0.077	0.012	0.5429	0.0601	52.129	10.812	26.1	2020
NIOP 907	Tierney and Tingley 2015	0.2607	0.0649	0.0798	0.0128	0.5285	0.0533	52.249	10.804	26.1	2807
NIOP 908	Tierney and Tingley 2015	0.2863	0.0715	0.0842	0.0127	0.4941	0.0513	52.915	10.778	26.1	3572
NIOP 915	Tierney and Tingley 2015	0.2824	0.0717	0.0879	0.0121	0.4919	0.0541	53.524	10.69	26.6	4035
NIOP 922	Tierney and Tingley 2015	0.1955	0.0599	0.072	0.0139	0.5988	0.0599	52.53	16.17	26.6	201
North Frisian Front	Tierney and Tingley 2015	0.5059	0.0345	0.0131	0.0048	0.4381	0.0036	4.5	54	10.6	42
North Sea Breeveertien 14	Tierney and Tingley 2015	0.4563	0.0532	0.0188	0.0071	0.4605	0.0041	3.733	52.908	11.3	-999
North Sea Central Southern Bight	Tierney and Tingley 2015	0.4572	0.0445	0.0196	0.0071	0.4676	0.0041	3	53	10.3	40
North Sea Dutch Coast	Tierney and Tingley 2015	0.4792	0.0495	0.0167	0.0057	0.4436	0.0051	4.5	53	11	24
NP-07-13-08	Tierney and Tingley 2015	0.4896	0.014	0.0048	0.0031	0.486	0.0025	10.749	79.029	1.9	328
NP-07-13-09	Tierney and Tingley 2015	0.4771	0.0132	0.0049	0.0031	0.4989	0.0028	10.666	79.059	1.9	326
NP-07-13-10	Tierney and Tingley 2015	0.4563	0.0117	0.0043	0.0031	0.5225	0.002	10.847	79.065	1.9	325
NP-07-13-11	Tierney and Tingley 2015	0.5652	0.0147	0.0048	0.0029	0.4109	0.0016	11.661	79.118	1.9	313
NP-07-13-13	Tierney and Tingley 2015	0.5621	0.0175	0.0065	0.004	0.4073	0.0026	11.622	79.295	1.9	205
NP-07-13-14	Tierney and Tingley 2015	0.5789	0.0182	0.0056	0.0031	0.3921	0.0022	11.668	79.266	1.9	245
NP-07-13-15	Tierney and Tingley 2015	0.5814	0.0174	0.0054	0.003	0.3906	0.0022	11.706	79.228	1.9	269
NP-07-13-16	Tierney and Tingley 2015	0.5641	0.0147	0.005	0.0031	0.4107	0.0023	11.761	79.186	1.9	374
NP-07-13-21	Tierney and Tingley 2015	0.5511	0.0152	0.0051	0.0031	0.4231	0.0023	11.924	79.225	1.9	279
NP-07-13-23	Tierney and Tingley 2015	0.4911	0.0133	0.0047	0.0031	0.486	0.0018	11.028	79.015	1.9	336
NP-07-13-24	Tierney and Tingley 2015	0.4687	0.0123	0.0044	0.0031	0.5095	0.002	10.859	79.013	1.9	326
NP-07-13-25	Tierney and Tingley 2015	0.483	0.0134	0.0047	0.0031	0.4936	0.0022	10.87	79.04	1.9	340
NP-07-13-26	Tierney and Tingley 2015	0.4784	0.013	0.0046	0.0032	0.4983	0.0024	11.086	79.051	1.9	334
NP-07-13-30	Tierney and Tingley 2015	0.5182	0.0161	0.0053	0.003	0.455	0.0023	16.714	-29.136	13.7	88
NP-07-13-31	Tierney and Tingley 2015	0.5301	0.0157	0.0051	0.0028	0.4444	0.0019	16.28	80.362	1.1	398
NP-07-13-32	Tierney and Tingley 2015	0.5033	0.015	0.0051	0.0032	0.4711	0.0024	16.955	80.214	1.1	451
NP-07-13-33	Tierney and Tingley 2015	0.5115	0.0149	0.0052	0.0031	0.463	0.0024	17.173	80.099	1.2	416
NP-07-13-34	Tierney and Tingley 2015	0.5132	0.0148	0.0051	0.0032	0.4612	0.0025	17.764	79.949	1.2	400
NP-07-13-35	Tierney and Tingley 2015	0.5524	0.0154	0.005	0.0031	0.4221	0.0021	18.134	79.798	1.2	446
NP-07-13-36	Tierney and Tingley 2015	0.5478	0.0163	0.0055	0.0033	0.425	0.0021	18.859	79.614	1.2	339
NP-07-13-40	Tierney and Tingley 2015	0.5492	0.0151	0.0052	0.0031	0.4256	0.0018	11.952	78.956	1.9	342
NP-07-13-41	Tierney and Tingley 2015	0.5462	0.0146	0.005	0.003	0.4295	0.0018	11.491	79.064	1.9	307
NP-07-13-42	Tierney and Tingley 2015	0.5433	0.0153	0.0049	0.0031	0.4316	0.0018	11.837	78.986	1.9	320
NP-07-13-44	Tierney and Tingley 2015	0.5475	0.015	0.005	0.0031	0.4278	0.0016	11.726	79.012	1.9	285
NP-07-13-46	Tierney and Tingley 2015	0.5304	0.0149	0.0049	0.0031	0.4447	0.0019	11.493	79.029	1.9	267
NP-07-13-47	Tierney and Tingley 2015	0.5327	0.0159	0.0052	0.0031	0.441	0.0022	11.599	79.016	1.9	252
NP-07-13-48	Tierney and Tingley 2015	0.4924	0.0129	0.0045	0.003	0.4852	0.0019	11.505	79	1.9	359
NP-07-13-49	Tierney and Tingley 2015	0.4763	0.0124	0.0045	0.003	0.5017	0.0021	-55.823	-63.071	-0.7	743
NP-07-13-50	Tierney and Tingley 2015	0.4888	0.013	0.0044	0.0029	0.4888	0.0021	11.31	79.032	1.9	330
NP-07-13-51	Tierney and Tingley 2015	0.5015	0.0136	0.0051	0.0032	0.4749	0.0018	11.37	79.044	1.9	335
NP-07-13-52	Tierney and Tingley 2015	0.3788	0.0113	0.004	0.0028	0.6	0.0031	11.377	79.073	1.9	295
NP-07-13-53	Tierney and Tingley 2015	0.5358	0.0152	0.0052	0.0031	0.4387	0.002	11.653	78.986	1.9	286
NP-07-13-55	Tierney and Tingley 2015	0.5767	0.0147	0.0047	0.0027	0.3996	0.0016	11.744	79.149	1.9	340
NP-07-13-60	Tierney and Tingley 2015	0.551	0.0151	0.0051	0.0033	0.424	0.0015	12.062	78.928	1.9	204
NP-07-13-61	Tierney and Tingley 2015	0.5472	0.0171	0.0088	0.0045	0.4198	0.0025	12.405	78.907	1.9	73
NP-07-13-64	Tierney and Tingley 2015	0.5382	0.0145	0.0047	0.0029	0.4376	0.002	11.807	78.965	1.9	299
OCE205	Tierney and Tingley 2015	0.1854	0.0667	0.0771	0.0376	0.6004	0.0328	-77.7	26.2	26.4	-999
OCE437-7 MC11A	Tierney and Tingley 2015	0.307	0.0673	0.0593	0.0132	0.5256	0.0277	-9.0653	36.3901	18.1	596
OCE437-7 MC12C	Tierney and Tingley 2015	0.2896	0.0697	0.0772	0.0115	0.5157	0.0362	-7.5315	35.8903	19.2	1184
OCE437-7 MC15G	Tierney and Tingley 2015	0.296	0.067	0.059	0.0139	0.5362	0.0279	-7.7643	34.115	19.5	388
OCE437-7 MC18C	Tierney and Tingley 2015	0.2766	0.073	0.0808	0.0115	0.5211	0.0369	-9.3165	33.4485	19.5	835
OCE437-7 MC1A	Tierney and Tingley 2015	0.2826	0.0682	0.0747	0.0105	0.5272	0.0367	-9.5128	37.8278	17.3	1123
OCE437-7 MC22C	Tierney and Tingley 2015	0.3345	0.0648	0.0555	0.01	0.5068	0.0283	-10.2829	30.8603	17.6	835
OCE437-7 MC25C	Tierney and Tingley 2015	0.316	0.0654	0.0621	0.0095	0.5159	0.0311	-10.6317	30.8882	17.6	1244
OCE437-7 MC28D	Tierney and Tingley 2015	0.276	0.0711	0.0771	0.0091	0.5272	0.0395	-12.4669	29.0181	19.5	776
OCE437-7 MC31A	Tierney and Tingley 2015	0.3288	0.066	0.0639	0.0095	0.5003	0.0314	-13.7408	27.5371	19.7	1029
OCE437-7 MC36F	Tierney and Tingley 2015	0.2893	0.0723	0.0823	0.0086	0.5076	0.0399	-15.1201	26.8273	20.3	2812
OCE437-7 MC39E	Tierney and Tingley 2015	0.2982	0.0762	0.077	0.0084	0.5024	0.0379	-16.4069	25.4993	20.2	1780
OCE437-7 MC42A	Tierney and Tingley 2015	0.3084	0.0724	0.0697	0.0085	0.5036	0.0374	-16.6571	25.0203	20.2	1401
OCE437-7 MC44B	Tierney and Tingley 2015	0.3149	0.073	0.0723	0.0078	0.4955	0.0366	-17.0478	24.3686	20.8	1662
OCE437-7 MC4E	Tierney and Tingley 2015	0.2778	0.0654	0.076	0.0091	0.5311	0.0407	-10.184	37.8372	17.9	3146
OCE437-7 MC50B	Tierney and Tingley 2015	0.3181	0.0717	0.0687	0.0077	0.4975	0.0363	-17.8542	23.2071	19.3	2295
OCE437-7 MC51B	Tierney and Tingley 2015	0.3278	0.0682	0.0565	0.0084	0.5055	0.0335	-17.8708	21.797	18.4	1276
OCE437-7 MC55B	Tierney and Tingley 2015	0.3331	0.0643	0.0504	0.0094	0.5123	0.0304	-17.8028	21.2393	18.4	798
OCE437-7 MC63E	Tierney and Tingley 2015	0.3426	0.0701	0.0614	0.0093	0.4837	0.0329	-18.5512	20.7463	20.2	2106
OCE437-7 MC65H	Tierney and Tingley 2015	0.3315	0.0699	0.0565	0.0101	0.4994	0.0325	-17.8607	19.9434	20.1	1455
OCE437-7 MC67D	Tierney and Tingley 2015	0.3279	0.0721	0.0593	0.0095	0.4982	0.0329	-17.2767	19.3567	20.1	1393
OCE437-7 MC69A	Tierney and Tingley 2015	0.3401	0.0727	0.0639	0.0097	0.48	0.0336	-17.3348	18.6388	22.2	2282
OCE437-7 MC78F	Tierney and Tingley 2015	0.2814	0.0726	0.0794	0.0103	0.5158	0.0405	-23.4132	15.31	24.2	944
OCE437-7 MC7B	Tierney and Tingley 2015	0.2878	0.063	0.0749	0.0098	0.526	0.0384	-9.8672	36.7722	18.1	2735
OMEX 98-5	Tierney and Tingley 2015	0.3804	0.0671	0.0484	0.0114	0.4737	0.019	9.29	41.38	17.8	765
OMEX 99-15	Tierney and Tingley 2015	0.4117	0.0592	0.0357	0.0102	0.4663	0.0168	9.37	39.35	18.4	-999
Oyster grounds	Tierney and Tingley 2015	0.5028	0.0331	0.0123	0.0049	0.4438	0.0032	4.5	54.5	10.6	47
PD90-7-21	Tierney and Tingley 2015	0.5256	0.0161	0.0057	0.0025	0.4474	0.0026	-62.599	-64.907	-0.2	240
PD90-7-6	Tierney and Tingley 2015	0.5165	0.0192	0.0061	0.0025	0.4524	0.0033	-63.191	-65.121	-0.2	171
PD90-7-8	Tierney and Tingley 2015	0.5426	0.0207	0.0062	0.0024	0.4246	0.0035	-63.22	-65.155	-0.2	493
PD90-7-9	Tierney and Tingley 2015	0.5472	0.0195	0.006	0.0023	0.4226	0.0025	-63.228	-65.166	-0.2	490
Peru Margin PM1	Tierney and Tingley 2015	0.3144	0.0481	0.0326	0.0102	0.5806	0.014	-77.317	-11.983	18.5	100
Peru Margin PM7	Tierney and Tingley 2015	0.2854	0.0516	0.0496	0.0133	0.5812	0.0189	-78.067	-11.05	19.9	250
PLS-91-1-1	Tierney and Tingley 2015	0.496	0.0225	0.0055	0.0026	0.4707	0.0027	29.202	78.308	0.3	303
PLS-91-1-10	Tierney and Tingley 2015	0.494	0.0554	0.0175	0.0029	0.4217	0.0085	32.377	83.706	-1.7	4004
PLS-91-1-12	Tierney and Tingley 2015	0.4962	0.0609	0.0179	0.0027	0.4146	0.0077	33.94	84.185	-1.1	4052
PLS-91-1-14	Tierney and Tingley 2015	0.497	0.0481	0.014	0.0031	0.4307	0.0071	40.599	84.807	-1	4018
PLS-91-1-17	Tierney and Tingley 2015	0.5214	0.0371	0.0121	0.0043	0.4194	0.0057	140.498	-65.468	-1.2	1567
PLS-91-1-20	Tierney and Tingley 2015	0.503	0.0342	0.0099	0.003	0.4446	0.0052	48.229	83.017	-1.7	2900
PLS-91-1-21	Tierney and Tingley 2015	0.49	0.0383	0.0152	0.0038	0.4473	0.0053	47.889	82.662	-0.8	1345
PLS-91-1-23	Tierney and Tingley 2015	0.5049	0.0218	0.0058	0.006	0.4578	0.0037	43.432	81.118	-1.3	466
PLS-91-1-24	Tierney and Tingley 2015	0.5506	0.0245	0.0062	0.0059	0.4103	0.0025	42.874	81.021	-0.8	472
PLS-91-1-31	Tierney and Tingley 2015	0.5336	0.0275	0.0078	0.0035	0.4238	0.0038	21.273	73.724	5.3	1536
PLS-91-1-5	Tierney and Tingley 2015	0.5053	0.0248	0.0066	0.0035	0.4559	0.0039	29.021	80.867	-0.8	4018
PLS-91-1-6	Tierney and Tingley 2015	0.5111	0.0208	0.0052	0.0025	0.4566	0.0038	28.534	81.487	0	628
PS2334-1	Tierney and Tingley 2015	0.541	0.0527	0.0221	0.0033	0.371	0.0099	-52	-57.9175	2.3	4557
PS2336-1	Tierney and Tingley 2015	0.5614	0.0533	0.0226	0	0.3539	0.0089	-53.9885	-57.1518	2.7	4006
PS2339-1	Tierney and Tingley 2015	0.5265	0.0611	0.0232	0.0046	0.372	0.0126	-56.9433	-56.0308	4	4542
PS2342-1	Tierney and Tingley 2015	0.4988	0.0659	0.0259	0.0047	0.3917	0.0131	-57.9843	-55.2582	5.1	4372
PS2453-2	Tierney and Tingley 2015	0.4952	0.0242	0.0255	0.0067	0.4423	0.0061	133.355	76.5083	2	38
PS2455-3	Tierney and Tingley 2015	0.4942	0.0415	0.0128	0.0063	0.4388	0.0063	130.535	79.6517	-1.7	3429
PS2458-4	Tierney and Tingley 2015	0.4911	0.0238	0.0136	0.0046	0.4626	0.0044	133.398	78.1667	-1.3	983
PS2461-2	Tierney and Tingley 2015	0.4878	0.0214	0.0152	0.0047	0.4671	0.0036	133.555	77.91	-0.4	73
PS2462-3	Tierney and Tingley 2015	0.4756	0.022	0.0179	0.0058	0.4735	0.0052	133.557	77.405	-0.4	54
PS2470-1	Tierney and Tingley 2015	0.4903	0.0409	0.0164	0.0056	0.4401	0.0067	122.855	79.2267	-1.8	3237
PS2472-3	Tierney and Tingley 2015	0.4891	0.0306	0.0118	0.0043	0.4591	0.0051	118.738	78.6667	-1.8	2620
PS2473-3	Tierney and Tingley 2015	0.5031	0.0272	0.016	0.0044	0.4444	0.0048	118.572	77.9817	-1.8	1927
PS2474-2	Tierney and Tingley 2015	0.4938	0.0266	0.0137	0.004	0.4569	0.005	118.575	77.67	-1.8	1497
PS2478-3	Tierney and Tingley 2015	0.5034	0.02	0.0119	0.004	0.4566	0.004	118.71	77.1717	-1.8	101
PS2489-2	Tierney and Tingley 2015	0.4497	0.068	0.044	0.0037	0.4187	0.0159	8.9733	-42.8733	10.1	3794
PS2579-1	Tierney and Tingley 2015	0.6066	0.0459	0.0149	0.0025	0.3221	0.0079	7.7717	-62.9583	-0.4	5305
PS2589-2	Tierney and Tingley 2015	0.5795	0.0552	0.0178	0.0029	0.3372	0.0075	24.9767	-66.0017	-1.5	4641
PS2659-2	Tierney and Tingley 2015	0.5006	0.0674	0.0389	0.0016	0.3815	0.0101	-85.688	-50.749	6.8	4579
PS2663-4	Tierney and Tingley 2015	0.5546	0.0547	0.0277	0.0022	0.3541	0.0067	-89.547	-53.287	7.4	4972
PS2687-5	Tierney and Tingley 2015	0.5462	0.0565	0.0321	0.0024	0.3518	0.0109	-92.556	-68.074	-0.5	4454
PS2691-1	Tierney and Tingley 2015	0.5339	0.0659	0.0216	0.0011	0.3713	0.0061	-91.171	-65.395	1	4715
PS2697-1	Tierney and Tingley 2015	0.4546	0.0795	0.0335	0.0038	0.418	0.0106	-89.493	-62.997	2.6	4783
PS2715-3	Tierney and Tingley 2015	0.5447	0.0662	0.0277	0.0017	0.3526	0.007	-88.008	-57.041	6.2	5190
PS2728-2	Tierney and Tingley 2015	0.5028	0.0233	0.0324	0.0067	0.4295	0.0053	135.008	77.25	-1.5	44
PS2747-8	Tierney and Tingley 2015	0.5256	0.0292	0.0132	0.0045	0.4223	0.0052	133.715	78.5133	-1.3	1995
PS2749-3	Tierney and Tingley 2015	0.5121	0.0331	0.0121	0.0043	0.4329	0.0056	135.113	79.1266	-1.6	2783
PS63/130-2	Tierney and Tingley 2015	0.5794	0.0538	0.0193	0.0023	0.3387	0.0064	23.0009	-61.4995	0.8	5220
PS63/139-2	Tierney and Tingley 2015	0.577	0.057	0.0188	0.0036	0.3356	0.008	23.0008	-58.2994	0.5	5413
PS63/143-2	Tierney and Tingley 2015	0.5816	0.0496	0.0156	0.0029	0.3428	0.0074	23.0141	-56.5071	1.6	4872
PS68/206-2	Tierney and Tingley 2015	0.5585	0.0169	0.006	0.0042	0.3825	0.032	18.5339	77.4587	1.8	105
PS68/211-2	Tierney and Tingley 2015	0.5603	0.0169	0.0058	0.0027	0.3815	0.0328	18.838	77.1491	1.8	124
PS68/242-2	Tierney and Tingley 2015	0.5425	0.0598	0.0221	0.0054	0.348	0.0221	2.8424	79.1336	0.6	5571
PS68/250-2	Tierney and Tingley 2015	0.581	0.0323	0.01	0.0026	0.3443	0.0299	5.1719	79.6038	2.7	2784
PS68/251-2	Tierney and Tingley 2015	0.5818	0.0341	0.0107	0.0034	0.3468	0.0232	4.3276	79.2829	1.9	2401
PS68/271-2	Tierney and Tingley 2015	0.5675	0.0315	0.0098	0.0034	0.3642	0.0236	4.6004	79.1081	1.9	1914
PS68/314-1	Tierney and Tingley 2015	0.5649	0.0353	0.0111	0.003	0.3504	0.0353	8.6337	81.0972	-1.7	1078
PS68/328-2	Tierney and Tingley 2015	0.5805	0.0273	0.0091	0.0029	0.3557	0.0245	5.8851	80.4783	0.1	604
PS68/331-2	Tierney and Tingley 2015	0.5846	0.0301	0.0087	0.0036	0.3401	0.0329	3.7054	80.1563	1.3	1613
PS68/338-3	Tierney and Tingley 2015	0.5744	0.0381	0.0147	0.0033	0.3457	0.0239	-3.9842	78.8321	-1.1	1934
PS68/341-2	Tierney and Tingley 2015	0.6003	0.0331	0.0113	0.0037	0.331	0.0207	-4.9754	78.8124	-1.3	1029
PS68/343-2	Tierney and Tingley 2015	0.612	0.0301	0.0102	0.004	0.3116	0.0322	-5.663	78.8302	-1.1	436
PS68/352-2	Tierney and Tingley 2015	0.6201	0.0226	0.0063	0.0022	0.331	0.0178	-10.0561	78.8344	-0.5	311
PS68/357-2	Tierney and Tingley 2015	0.5652	0.0214	0.0061	0.0034	0.375	0.0289	-12.515	78.829	-0.7	195
PS68/371-2	Tierney and Tingley 2015	0.5504	0.0386	0.0135	0.0038	0.3704	0.0233	14.6632	71.9604	6.9	1352
PS69/793-1	Tierney and Tingley 2015	0.4931	0.0159	0.0041	0.0024	0.4829	0.0016	72.8878	-68.0113	-0.5	703
PS69/853-2	Tierney and Tingley 2015	0.4912	0.0307	0.0079	0	0.4702	0	69.2178	-65.998	0.2	2365
PS69/878-4	Tierney and Tingley 2015	0.5653	0.0358	0.0109	0.0023	0.3858	0	82.6562	-65.3425	-1	3093
PS69/885-1	Tierney and Tingley 2015	0.5226	0.0407	0.0128	0.0027	0.4175	0.0037	82.8733	-63.8372	0.6	3702
PS69/891-3	Tierney and Tingley 2015	0.5127	0.0618	0.0215	0.0033	0.3955	0.0053	82.836	-62.6557	0.7	2295
PS69/899-1	Tierney and Tingley 2015	0.5191	0.0537	0.0177	0.003	0.4002	0.0064	85.6737	-59.6217	1.7	4126
PS69/907-3	Tierney and Tingley 2015	0.4523	0.0672	0.0281	0.0026	0.4421	0.0078	73.3332	-55.0048	2.1	2251
PS69/912-5	Tierney and Tingley 2015	0.5263	0.0342	0.0109	0.0037	0.4215	0.0034	71.5652	-50.3107	2.7	565
PS70/277-2	Tierney and Tingley 2015	0.5288	0.0255	0.0105	0.0037	0.4163	0.0154	83.8702	82.4096	-1.7	1564
PS70/309-8	Tierney and Tingley 2015	0.5246	0.0443	0.0155	0.0054	0.3868	0.0234	104.659	87.0696	-1.5	4443
PS70/319-2	Tierney and Tingley 2015	0.5409	0.0465	0.0142	0.0022	0.3658	0.0303	153.734	88.6752	-1.6	2746
PS70/333-4	Tierney and Tingley 2015	0.5446	0.062	0.0172	0.0018	0.345	0.0294	-146	87	-1.6	3368
PS70/358-3	Tierney and Tingley 2015	0.5656	0.0531	0.0234	0.0011	0.3304	0.0264	152.1	86.5256	-1.7	1467
PS75/034-1	Tierney and Tingley 2015	0.486	0.0703	0.0353	0.0032	0.3995	0.0056	-80.0897	-54.3685	7	4450
PS75/051-2	Tierney and Tingley 2015	0.4717	0.0627	0.0338	0.0033	0.4134	0.0151	-107.805	-52.8123	6.8	3977
PS75/053-1	Tierney and Tingley 2015	0.5165	0.0692	0.0309	0.0038	0.3682	0.0115	-115.98	-60.7692	2.6	5132
PS75/062-1	Tierney and Tingley 2015	0.5482	0.0736	0.0295	0.0028	0.3362	0.0096	-135.626	-58.277	1.5	4147
PS75/063-2	Tierney and Tingley 2015	0.548	0.0604	0.0248	0.0028	0.3503	0.0137	-135.621	-58.9042	1.5	3790
PS75/065-2	Tierney and Tingley 2015	0.5851	0.0656	0.0175	0.0023	0.322	0.0075	-141.515	-62.6039	0.7	4488
PS75/068-1	Tierney and Tingley 2015	0.5682	0.0462	0.0178	0.0019	0.3573	0.0086	-144.115	-64.9334	-1.5	3727
PS75/069-2	Tierney and Tingley 2015	0.5807	0.0632	0.0193	0.0023	0.3232	0.0114	-145.619	-62.2055	-0.2	4328
PS75/070-1	Tierney and Tingley 2015	0.5516	0.0614	0.0226	0.0028	0.3524	0.0092	-150.066	-58.5814	0.2	2839
PS75/072-3	Tierney and Tingley 2015	0.563	0.0672	0.026	0.0035	0.3307	0.0097	-151.219	-57.5599	1	3096
PS75/074-1	Tierney and Tingley 2015	0.5296	0.0703	0.0301	0.0027	0.3522	0.0152	-152.655	-56.2445	2.1	3318
PS75/076-1	Tierney and Tingley 2015	0.4954	0.0719	0.0347	0.0029	0.3845	0.0105	-156.141	-55.5285	4.7	3745
PS75/080-2	Tierney and Tingley 2015	0.5449	0.0641	0.0272	0.0027	0.3531	0.008	-157.637	-58.1774	2	3870
PS75/082-2	Tierney and Tingley 2015	0.5387	0.0712	0.03	0.0033	0.3479	0.0088	-158.364	-59.0417	3.1	4004
PS75/084-1	Tierney and Tingley 2015	0.5464	0.0592	0.0268	0.0034	0.357	0.0072	-159.587	-61.0498	0.6	3313
PS75/085-2	Tierney and Tingley 2015	0.5371	0.0638	0.0264	0.0029	0.3599	0.0099	-160.119	-61.9394	0.6	3724
PS75/086-1	Tierney and Tingley 2015	0.5915	0.0545	0.0194	0.0023	0.3258	0.0064	-161.904	-64.744	-1.1	4064
PS75/087-2	Tierney and Tingley 2015	0.5809	0.0484	0.0175	0.0026	0.3421	0.0085	-163.325	-66.7879	-0.5	4411
PS75/088-3	Tierney and Tingley 2015	0.5497	0.0502	0.019	0.0028	0.3677	0.0106	-164.801	-68.7303	-0.2	3849
PS75/089-6	Tierney and Tingley 2015	0.5576	0.0562	0.018	0.0027	0.3541	0.0114	-165.542	-67.083	0	4121
PS75/090-6	Tierney and Tingley 2015	0.5626	0.0578	0.0204	0.0025	0.3483	0.0085	-166.155	-65.411	0.2	3480
PS75/091-6	Tierney and Tingley 2015	0.5707	0.0684	0.0246	0.003	0.323	0.0103	-169.075	-63.6938	0.7	2944
PS75/092-1	Tierney and Tingley 2015	0.5065	0.0798	0.0342	0.0028	0.3633	0.0133	-169.502	-60.6673	1.7	3833
PS75/094-3	Tierney and Tingley 2015	0.5406	0.0653	0.0271	0.0026	0.3547	0.0096	-169.741	-61.8224	1.2	3274
PS75/095-6	Tierney and Tingley 2015	0.516	0.0699	0.0316	0.0039	0.3681	0.0105	-174.431	-57.0196	4.5	4857
PS75/097-5	Tierney and Tingley 2015	0.5314	0.0673	0.0341	0.0027	0.3528	0.0116	-171.357	-59.7004	4	4675
PS75/098-6	Tierney and Tingley 2015	0.5074	0.0677	0.0349	0.0037	0.3712	0.0153	-179.01	-52.9663	8.3	5187
PS75/099-1	Tierney and Tingley 2015	0.5105	0.0639	0.0346	0.0045	0.3719	0.0147	177.273	-48.2618	8.9	1270
PS75/100-1	Tierney and Tingley 2015	0.4991	0.0653	0.0364	0.0035	0.383	0.0127	177.149	-45.7576	12	2502
PS75/101-2	Tierney and Tingley 2015	0.5046	0.0692	0.0316	0.0044	0.3769	0.0133	175.876	-45.8062	10.9	1773
PS75/104-2	Tierney and Tingley 2015	0.5052	0.0582	0.029	0.0071	0.3917	0.0088	174.526	-44.7693	11.4	835
PS75/105-1	Tierney and Tingley 2015	0.5133	0.0502	0.0231	0.0066	0.3953	0.0115	174.625	-44.4086	11.4	669
RS01-MC359	Tierney and Tingley 2015	0.1013	0.0459	0.0906	0.0226	0.6541	0.0855	34.597	27.687	25.3	1018
RS08-MC601	Tierney and Tingley 2015	0.1705	0.0584	0.0995	0.02	0.5709	0.0807	35.047	27.712	25.3	863
RS09-MC596	Tierney and Tingley 2015	0.0989	0.047	0.0962	0.0222	0.654	0.0816	35.405	27.053	25.7	628
RS13-MC360	Tierney and Tingley 2015	0.1231	0.0545	0.1113	0.0241	0.5947	0.0924	35.36	26.292	25.7	1175
RS15-MC362	Tierney and Tingley 2015	0.1112	0.0477	0.0924	0.0213	0.6395	0.0878	35.085	25.75	25.9	666
RS17-MC363	Tierney and Tingley 2015	0.1137	0.0497	0.1137	0.022	0.6022	0.0988	35.608	25.522	25.9	941
RS19-MC364	Tierney and Tingley 2015	0.1061	0.0458	0.1216	0.021	0.6056	0.0999	36.23	24.76	26.6	1185
RS23-MC365	Tierney and Tingley 2015	0.0828	0.0393	0.1143	0.0215	0.6269	0.1152	36.712	23.312	26.8	1024
RS24-MC71	Tierney and Tingley 2015	0.0874	0.0402	0.1155	0.0205	0.6156	0.1207	36.982	23.392	26.8	1387
RS26-MC73	Tierney and Tingley 2015	0.0771	0.0373	0.1111	0.0236	0.6423	0.1086	37.377	22.915	27.4	1324
RS29-MC79	Tierney and Tingley 2015	0.0768	0.0327	0.1125	0.0226	0.6377	0.1177	37.782	22.252	27.4	1521
RS31-MC85	Tierney and Tingley 2015	0.0795	0.0377	0.1249	0.0236	0.6174	0.1169	37.98	21.428	28	1538
RS39-MC95	Tierney and Tingley 2015	0.0721	0.0368	0.1015	0.0208	0.6691	0.0996	38.012	19.907	28.8	713
RS41-MC101	Tierney and Tingley 2015	0.0841	0.0401	0.1228	0.0238	0.617	0.1122	38.423	20.105	28.6	2309
RS42-MC113	Tierney and Tingley 2015	0.0749	0.0385	0.1079	0.0231	0.639	0.1167	38.608	19.64	28.8	1991
RS44-MC111	Tierney and Tingley 2015	0.0781	0.0372	0.1074	0.0211	0.6565	0.0998	38.722	19.458	28.8	1825
RS46-MC108	Tierney and Tingley 2015	0.0747	0.0367	0.1016	0.0194	0.6622	0.1054	39.053	19.135	29.1	1657
RS50-MC105	Tierney and Tingley 2015	0.0808	0.0422	0.1028	0.0186	0.6564	0.0992	39.057	18.602	29.2	501
RS51-MC366	Tierney and Tingley 2015	0.0904	0.043	0.0983	0.0195	0.6583	0.0905	40.022	17.362	29.3	475
RS53-MC367	Tierney and Tingley 2015	0.1146	0.0457	0.0807	0.019	0.6577	0.0823	41.67	15.56	29	604
S017	Tierney and Tingley 2015	0.182	0.05	0.064	0.011	0.635	0.058	119.5	20.25	26.9	2800
S031	Tierney and Tingley 2015	0.176	0.051	0.07	0.011	0.63	0.061	111	10.5	27.9	2521
S052	Tierney and Tingley 2015	0.152	0.046	0.068	0.016	0.66	0.059	115.5	7.25	28.5	1609
S072	Tierney and Tingley 2015	0.204	0.057	0.07	0.012	0.602	0.055	119.09	20.65	26.9	3447
S098	Tierney and Tingley 2015	0.181	0.048	0.065	0.012	0.642	0.051	119.88	19.31	27.2	4182
S137	Tierney and Tingley 2015	0.194	0.05	0.063	0.009	0.625	0.06	118.36	17.28	27.3	3986
S181	Tierney and Tingley 2015	0.18	0.049	0.072	0.009	0.628	0.061	117.84	17.29	27.2	3960
S199	Tierney and Tingley 2015	0.177	0.052	0.076	0.009	0.622	0.063	118.93	16.17	27.9	3675
Santa Barbara basin	Tierney and Tingley 2015	0.4363	0.0824	0.0507	0.0021	0.4135	0.0151	-120.017	34.217	14.8	530
SEPT01-07 BEN	Tierney and Tingley 2015	0.4892	0.0156	0.0052	0.003	0.4848	0.0021	-66.712	50.621	5.5	214
SO202-01-3	Tierney and Tingley 2015	0.4824	0.073	0.0388	0.004	0.3894	0.0124	152.92	44.0259	6	5282
SO202-02-4	Tierney and Tingley 2015	0.4922	0.0798	0.0409	0.0035	0.3726	0.0109	156.982	46.9689	5.3	4822
SO202-03-4	Tierney and Tingley 2015	0.4359	0.082	0.0535	0	0.4286	0	160.379	49.6141	4.9	5429
SO202-04-3	Tierney and Tingley 2015	0.4306	0.0924	0.041	0	0.4222	0.0138	163.16	51.8633	5.1	5273
SO202-05-3	Tierney and Tingley 2015	0.4564	0.0873	0.0533	0.0037	0.3981	0.0013	164.919	52.6961	5.3	3362
SO202-07-2	Tierney and Tingley 2015		0.0736	0.0462	0.0038	0.4182	0.0134	167.699	51.2716	5.3	2349
SO202-08-1	Tierney and Tingley 2015	0.4852	0.0735	0.0378	0.004	0.3981	0.0013	170.821	50.5422	5.9	3630
SO202-09-2	Tierney and Tingley 2015	0.463	0.0649	0.0407	0.0067	0.4089	0.0158	175.161	49.6635	6.2	5028
SO202-10-2	Tierney and Tingley 2015	0.4877	0.0559	0.0327	0.0037	0.4088	0.0112	179.848	52.7427	5.3	1488
SO202-11-1	Tierney and Tingley 2015	0.7588	0.1155	0.0583	0	0.0674	0	178.9	53.1113	5.3	2704
SO202-13-4	Tierney and Tingley 2015	0.4475	0.07	0.043	0.0033	0.4241	0.0121	177.957	54.9788	5.5	1383
SO202-15-4	Tierney and Tingley 2015	0.4682	0.0602	0.0337	0.0036	0.4242	0.0102	-179.849	59.5124	4.4	3137
SO202-16-1	Tierney and Tingley 2015	0.447	0.0356	0.0165	0.003	0.4891	0.0088	-179.11	60.403	4.6	548
SO202-18-1	Tierney and Tingley 2015	0.4577	0.0751	0.0421	0.0032	0.4101	0.0118	-179.443	60.1263	4.6	1108
SO202-21-2	Tierney and Tingley 2015	0.4388	0.0687	0.028	0.0074	0.4461	0.0111	-170.328	54.7888	5.5	1911
SO202-22-1	Tierney and Tingley 2015	0.4963	0.0556	0.0275	0.0036	0.4093	0.0078	-168.812	54.5737	5.5	1478
SO202-23-4	Tierney and Tingley 2015	0.4385	0.0779	0.0555	0	0.4102	0.018	-160.504	52.1727	7.1	4613
SO202-24-2	Tierney and Tingley 2015	0.4415	0.0714	0.0533	0	0.421	0.0128	-157.193	53.0025	6.8	4565
SO202-25-1	Tierney and Tingley 2015	0.4447	0.0851	0.0521	0	0.4012	0.017	-152.686	54.0985	6.9	4588
SO202-26-1	Tierney and Tingley 2015	0.4467	0.0702	0.0467	0	0.4205	0.016	-150.383	54.6378	6.9	742
SO202-27-1	Tierney and Tingley 2015	0.4279	0.0794	0.0516	0.004	0.4229	0.0142	-149.597	54.2962	7	2916
SO202-28-1	Tierney and Tingley 2015	0.4391	0.0803	0.0512	0.0038	0.4121	0.0136	-148.884	54.4185	7.1	3710
SO202-29-5	Tierney and Tingley 2015	0.7312	0.1237	0.0765	0.0057	0.0613	0.0018	-148.895	52.028	7.4	3984
SO202-32-5	Tierney and Tingley 2015	0.4857	0.0611	0.0373	0.0035	0.4023	0.01	-158.5	45.5003	9.6	5302
SO202-33-5	Tierney and Tingley 2015	0.4465	0.0595	0.0288	0.003	0.4483	0.0139	-174.141	45.0838	7.8	6159
SO202-34-4	Tierney and Tingley 2015	0.444	0.0657	0.0392	0.0045	0.4295	0.0171	-177.676	40.8875	13.4	5713
SO202-36-6	Tierney and Tingley 2015	0.7234	0.1208	0.0704	0.0099	0.0728	0.0028	176.697	38.1898	15.6	4522
SO202-37-1	Tierney and Tingley 2015	0.7106	0.1187	0.0761	0	0.0904	0.0042	176.268	37.7675	16.9	3573
SO202-38-1	Tierney and Tingley 2015	0.4646	0.0621	0.0375	0	0.4102	0.0257	169.281	38.0435	16.1	5503
SO202-39-2	Tierney and Tingley 2015	0.4263	0.0665	0.0437	0	0.4439	0.0196	164.447	38.0115	16	5096
SO202-41-3	Tierney and Tingley 2015	0.4192	0.0646	0.0429	0.0064	0.4454	0.0214	160.334	38.4132	16.4	5408
SO202-42-3	Tierney and Tingley 2015	0.7518	0.1037	0.0667	0.0102	0.065	0.0027	157.628	38.8917	15.9	5535
SO202-45-2	Tierney and Tingley 2015	0.4224	0.0647	0.0428	0	0.4544	0.0157	149.485	40.2917	13	5476
SO95-17941	Tierney and Tingley 2015	0.2	0.059	0.078	0.011	0.597	0.056	118.48	21.52	26.7	2201
SO95-17942	Tierney and Tingley 2015	0.169	0.051	0.063	0.014	0.651	0.053	113.2	19.33	26.5	329
SO95-17943	Tierney and Tingley 2015	0.193	0.06	0.077	0.013	0.593	0.065	117.55	18.95	26.9	917
SO95-17944	Tierney and Tingley 2015	0.197	0.061	0.073	0.01	0.604	0.054	113.64	18.66	26.8	1219
SO95-17945	Tierney and Tingley 2015	0.193	0.066	0.07	0.009	0.613	0.048	113.78	18.13	26.8	2404
SO95-17946	Tierney and Tingley 2015	0.217	0.055	0.073	0.009	0.592	0.054	114.25	18.13	26.8	3465
SO95-17947	Tierney and Tingley 2015	0.2	0.063	0.086	0.012	0.575	0.065	116.03	18.47	26.9	3765
SO95-17948	Tierney and Tingley 2015	0.213	0.057	0.073	0.011	0.592	0.054	114.9	16.71	27.1	2841
SO95-17949	Tierney and Tingley 2015	0.203	0.064	0.087	0.011	0.573	0.06	115.17	17.35	26.9	2195
SO95-17950	Tierney and Tingley 2015	0.193	0.062	0.085	0.011	0.591	0.059	112.9	16.09	28	1868
SO95-17951	Tierney and Tingley 2015	0.183	0.057	0.077	0.01	0.625	0.049	113.41	16.29	27.3	2340
SO95-17952	Tierney and Tingley 2015	0.212	0.06	0.078	0.01	0.584	0.057	114.47	16.67	27.1	2864
SO95-17954	Tierney and Tingley 2015	0.205	0.061	0.078	0.012	0.586	0.058	111.53	14.8	27.4	1517
SO95-17955	Tierney and Tingley 2015	0.201	0.058	0.075	0.01	0.604	0.053	112.18	14.12	27.6	2404
SO95-17956	Tierney and Tingley 2015	0.213	0.062	0.085	0.01	0.571	0.059	112.59	13.85	27.7	3387
SO95-17957	Tierney and Tingley 2015	0.218	0.055	0.079	0.009	0.577	0.061	115.3	10.9	28.1	2197
SO95-17958	Tierney and Tingley 2015	0.199	0.052	0.076	0.009	0.606	0.058	115.08	11.62	28.2	2581
SO95-17959	Tierney and Tingley 2015	0.179	0.05	0.08	0.01	0.63	0.051	115.29	11.14	28.2	1957
SO95-17960	Tierney and Tingley 2015	0.179	0.052	0.077	0.01	0.633	0.049	115.56	10.12	28.1	1707
SO95-17962	Tierney and Tingley 2015	0.145	0.05	0.071	0.013	0.663	0.058	112.08	7.18	28.9	1970
SO95-17963	Tierney and Tingley 2015	0.135	0.05	0.077	0.014	0.667	0.058	112.67	6.17	28.5	1233
SO95-17964	Tierney and Tingley 2015	0.119	0.047	0.072	0.015	0.7	0.046	112.21	6.16	28.5	1556
SO95-17965	Tierney and Tingley 2015	0.137	0.049	0.07	0.013	0.67	0.06	112.55	6.16	28.5	889
South Frisian Front	Tierney and Tingley 2015	0.4781	0.043	0.0174	0.0068	0.4498	0.0049	4.5	53.5	10.6	24
ST-32	Tierney and Tingley 2015	0.5112	0.0533	0.022	0.0038	0.3923	0.0174	143.682	-56.002	2.3	3429
ST-34	Tierney and Tingley 2015	0.5417	0.0505	0.0176	0.003	0.3781	0.0092	142.002	-60.045	1.5	4354
ST-35	Tierney and Tingley 2015	0.5119	0.0597	0.0233	0.0038	0.3865	0.0148	141.675	-62.013	0.4	4265
ST-45	Tierney and Tingley 2015	0.5317	0.0235	0.0069	0.0027	0.4308	0.0044	46.722	84.009	1.3	3960
Station A	Tierney and Tingley 2015	0.4826	0.0197	0.0051	0.0025	0.487	0.0031	-79.712	60.621	6.8	129
Station B	Tierney and Tingley 2015	0.4794	0.0181	0.0048	0.0025	0.4917	0.0035	-81.712	60.621	8.7	156
SX15	Tierney and Tingley 2015	0.175	0.05	0.069	0.012	0.64	0.054	119.5	21.25	27	2500
T89-10	Tierney and Tingley 2015	0.3429	0.0696	0.0654	0.0088	0.4751	0.0381	1.322	-2.077	25	2088
T89-12	Tierney and Tingley 2015	0.3484	0.0695	0.0632	0.0035	0.4421	0.0733	7.973	-5.2	26.5	4068
T89-13	Tierney and Tingley 2015	0.1884	0.0503	0.0652	0.0102	0.6468	0.0391	9.238	-4.107	25.4	3092
T89-14	Tierney and Tingley 2015	0.2911	0.0759	0.0732	0.0142	0.5139	0.0318	9.69	-3.509	25.3	868
T89-15	Tierney and Tingley 2015	0.2987	0.0774	0.0816	0.0133	0.4918	0.0373	10.022	-4.213	25.2	1930
T89-16	Tierney and Tingley 2015	0.2723	0.0743	0.0804	0.0173	0.5192	0.0363	11.228	-5.705	25	826
T89-17	Tierney and Tingley 2015	0.3191	0.0734	0.0738	0.0164	0.4724	0.0447	7.805	-6.818	26.3	4253
T89-19	Tierney and Tingley 2015	0.3389	0.0778	0.0765	0.0126	0.4624	0.0318	9.955	-6.043	26.1	3140
T89-20	Tierney and Tingley 2015	0.2737	0.0661	0.0746	0.0109	0.5372	0.0375	11.537	-7.307	25.9	1080
T89-21	Tierney and Tingley 2015	0.2628	0.0708	0.0743	0.0158	0.5438	0.0324	11.993	-7.275	25.9	490
T89-22	Tierney and Tingley 2015	0.2571	0.074	0.0754	0.0137	0.5483	0.0315	12.067	-7.13	25.9	200
T89-23	Tierney and Tingley 2015	0.2758	0.0678	0.0733	0.014	0.5384	0.0307	12.108	-8.513	24.9	796
T89-24	Tierney and Tingley 2015	0.3241	0.0813	0.0848	0.01	0.4627	0.0371	12.058	-8.908	24.9	2157
T89-25	Tierney and Tingley 2015	0.2383	0.0581	0.0735	0.0118	0.5901	0.0283	10.608	-9.368	25.7	4164
T89-28	Tierney and Tingley 2015	0.1695	0.0709	0.0892	0.0113	0.6436	0.0157	5.637	-10.387	24.6	5307
T89-30	Tierney and Tingley 2015	0.3931	0.0796	0.0613	0.0051	0.4273	0.0336	8.22	-14.877	22.1	4752
T89-32	Tierney and Tingley 2015	0.335	0.0896	0.0627	0.0087	0.4717	0.0324	10.668	-14.893	21.9	3342
T89-33	Tierney and Tingley 2015	0.3645	0.0895	0.0729	0.0126	0.4322	0.0284	11.62	-14.96	23.2	2027
T89-34	Tierney and Tingley 2015	0.322	0.0759	0.0599	0.01	0.5052	0.0269	11.967	-15.127	20.8	999
T89-35	Tierney and Tingley 2015	0.3168	0.0642	0.0499	0.0097	0.534	0.0254	11.62	-17.293	18.5	802
T89-36	Tierney and Tingley 2015	0.3522	0.0556	0.0336	0.0111	0.5269	0.0206	13.838	-14.96	23.2	131
T89-40	Tierney and Tingley 2015	0.3533	0.0909	0.0732	0.0068	0.4476	0.0282	6.782	-21.617	20	3060
T89-41	Tierney and Tingley 2015	0.3473	0.0911	0.0716	0.0058	0.4471	0.0371	6	-20.8	20.2	4282
T89-47	Tierney and Tingley 2015	0.3528	0.0878	0.0719	0.0055	0.4494	0.0326	4.427	-8.787	25.1	5362
TSP-1	Tierney and Tingley 2015	0.3961	0.0619	0.0392	0.006	0.4718	0.0251	147.49	-47.572	10.2	1301
TSP-2	Tierney and Tingley 2015	0.4492	0.0709	0.0411	0.0055	0.4167	0.0166	146.9	-48.127	9.7	2283
TSP-3	Tierney and Tingley 2015	0.454	0.0675	0.04	0.0043	0.4194	0.0149	146.41	-48.558	9.7	2897
WM1 MC33	Tierney and Tingley 2015	0.5034	0.0266	0.0123	0.0042	0.4472	0.0063	-124.3	46.333	11.8	70
WM2 MC30	Tierney and Tingley 2015	0.4653	0.0275	0.0153	0.0055	0.4781	0.0083	-124.383	46.5	11.8	90
WM3 MC28	Tierney and Tingley 2015	0.472	0.0255	0.0109	0.0021	0.4842	0.0054	-124.633	46.667	11.8	150
WM4 MC21	Tierney and Tingley 2015	0.4461	0.053	0.0288	0.0038	0.4565	0.0117	-125	46.817	12.4	600
WM5 MC20	Tierney and Tingley 2015	0.4304	0.0617	0.0385	0.0038	0.451	0.0147	-125.2	46.75	12.4	1000
XGA7-MC123	Tierney and Tingley 2015	0.2102	0.0669	0.0783	0.0125	0.5662	0.066	47.915	13.078	28.1	2215
XP98-MC1	Seki et al. 2014	0.651278	0.065892	0.0253786	0.00405241	0.246337	0.00706216	152.023	50.987	4.8	1102
XP98-MC2	Seki et al. 2014	0.654777	0.0578477	0.021928	0.00299181	0.255433	0.0070227	148.292	50.392	5.5	1258
XP98-MC3	Seki et al. 2015	0.589412	0.0735913	0.0359334	0.00328855	0.290074	0.00770002	146.333	53.767	6.9	1576
XP99 St.2MC	Seki et al. 2016	0.589884	0.0864383	0.0405234	0.00517289	0.269457	0.00852434	152.536	46.557	4.5	2625
XP99 St.16MC	Seki et al. 2017	0.66765	0.0668468	0.0251212	0.00356096	0.230571	0.00625013	151.108	47.202	3.8	3362
XP99 St.19MC	Seki et al. 2018	0.816471	0.0968958	0.0407262	0.00392439	0.0324256	0.00955688	149.69	48.591	4.7	1613
XP99 St.22MC	Seki et al. 2019	0.760248	0.029632	0.0077659	0.00304153	0.195812	0.00350073	145.671	49.521	5.8	490
XP99 St.MC5	Seki et al. 2020	0.677499	0.0381323	0.0125383	0.00456588	0.261736	0.005529	145.051	51.459	5.6	787
XP99−MC8	Seki et al. 2021	0.682816	0.0393523	0.0147815	0.00299538	0.255085	0.00497059	144.017	55.503	4.5	923
XP99 St.50MC	Seki et al. 2022	0.672822	0.0201367	0.00608219	0.00295629	0.292357	0.00564602	140.841	55.586	7.4	184
XP99 St.53MC	Seki et al. 2023	0.167089	0.0456071	0.0135589	0.0115045	0.753201	0.00903924	139.858	55.65	8	141
XP99 St.59MC	Seki et al. 2024	0.662439	0.018835	0.00646479	0.00442259	0.303832	0.00400635	138.902	55.741	8.2	108
XP99 St.63MC	Seki et al. 2025	0.685625	0.0206891	0.00593188	0.00440902	0.279966	0.00337928	141.001	54.987	7.8	134
XP99 St.68MC	Seki et al. 2026	0.651503	0.0211372	0.00687705	0.00488241	0.312355	0.00324501	141.991	54.986	7.4	117
XP00 St.31MC	Seki et al. 2027	0.660716	0.058476	0.0274258	0.00353881	0.243108	0.00673516	147.473	49.538	6.6	1242
XP00 MC5	Seki et al. 2028	0.688832	0.0205028	0.00668282	0.00436371	0.275823	0.00379577	144.133	51.251	5.9	154
XP00 MC6	Seki et al. 2029	0.664791	0.0217244	0.00675371	0.00397719	0.298402	0.00435239	143.839	52.972	6.1	72
XP00 MC7	Seki et al. 2030	0.635181	0.019254	0.00635081	0.00493952	0.33004	0.00423387	144.39	52.976	6	444
XP00 MC14	Seki et al. 2031	0.660228	0.0158441	0.00424757	0.00296656	0.3125	0.00421386	143.006	55.005	6.1	105
Kh06-G12	Seki et al. 2032	0.159278	0.0654454	0.0195777	0.00825059	0.7371	0.0103482	141.988	54.24	8.6	48
Kh06-F5	Seki et al. 2033	0.644227	0.0209325	0.0064485	0.00385705	0.320215	0.00431909	141.985	55.473	6.5	245
Kh06-D3	Seki et al. 2034	0.704266	0.0350221	0.0118364	0.00332705	0.240242	0.00530669	144.141	54.003	5.9	970
Kh06-D1	Seki et al. 2035	0.646587	0.0741639	0.0286774	0.0031403	0.240322	0.00711011	144.85	54.005	6.9	1425
Kh07-C6	Seki et al. 2036	0.68432	0.0312494	0.0112743	0.00418701	0.263107	0.00586181	145.002	52.241	6.2	850
Kh07-C9	Seki et al. 2037	0.604625	0.0831451	0.043995	0.00350006	0.255292	0.00944269	146.003	52.242	6.5	1431
Kh06-B7	Seki et al. 2038	0.658345	0.0203379	0.00726355	0.00493157	0.304725	0.00439636	144.518	49.501	7	127
Kh07-B6	Seki et al. 2039	0.736487	0.0220174	0.00664803	0.00383203	0.227142	0.00387329	145.002	49.492	6.4	267
Kh07-B1	Seki et al. 2040	0.655081	0.0701479	0.0284371	0.00434317	0.233474	0.00851738	148.259	49.5	5.6	1035
YK07-12 St1	Seki et al. 2041	0.644613	0.0698155	0.0298931	0.00362932	0.243424	0.0086245	149.205	51.272	5.1	1250
YK07-12 St5	Seki et al. 2042	0.647606	0.0909542	0.0377175	0.00342806	0.210896	0.00939836	149.141	52.657	5	1000
YK07-12 St6	Seki et al. 2043	0.640409	0.0817633	0.0404485	0.00307915	0.226605	0.00769449	149	53.153	5	1500
YK07-12 St8	Seki et al. 2044	0.626466	0.0589564	0.0301506	0.00379236	0.271006	0.00962883	150.074	53.276	4.7	1140
YK07-12 St10	Seki et al. 2045	0.728855	0.0320991	0.00887731	0.00269839	0.222457	0.00501353	149.323	54.751	4.7	600
ODP767	Seki et al. 2046	0.237788	0.0624716	0.082381	0.0148259	0.553269	0.0492652	123.3	4.47	28.9	4095
ODP772	Seki et al. 2047	0.151475	0.049126	0.0890516	0.0154847	0.643897	0.050965	119.421	16.391	28.3	1529
ODP782	Seki et al. 2048	0.30114	0.0666534	0.0659849	0.0095977	0.52301	0.0336135	141.189	30.517	22.9	2958
ODP793	Seki et al. 2049	0.263334	0.0552572	0.0556853	0.0105853	0.578769	0.0363689	140.533	31.635	22.7	2964
ODP796	Seki et al. 2050	0.480915	0.0506906	0.0232553	0.00369851	0.432251	0.00918908	139.247	42.509	12	2570
ODP799	Seki et al. 2051	0.483045	0.033059	0.0171752	0.00626584	0.451501	0.00895399	133.52	39.132	13.4	2073
ODP808	Seki et al. 2052	0.290836	0.0607596	0.0655199	0.0129059	0.533114	0.0368641	134.567	32.211	23.1	4676
ODP871	Seki et al. 2053	0.273407	0.0662171	0.0762656	0.0128028	0.538284	0.033024	172.207	5.334	28.8	1254
ODP882	Seki et al. 2054	0.258087	0.0707107	0.0816609	0.0117077	0.534953	0.0428805	167.36	50.218	5.5	3244
ODP883	Seki et al. 2055	0.468887	0.0680333	0.0301797	0.00310235	0.41919	0.0106078	167.461	51.119	5.5	3826
ODP884	Seki et al. 2056	0.430526	0.0723556	0.0342575	0.00385524	0.446037	0.0129687	168.202	51.27	5.5	3826
ODP887	Seki et al. 2057	0.45096	0.0566585	0.043822	0.00311991	0.432666	0.0127739	−148.268	54.219	7.2	3631
ODP1144	Seki et al. 2058	0.248001	0.0709587	0.0905525	0.0142356	0.520635	0.0556171	117.251	20.318	26.4	2035
ODP1148	Seki et al. 2059	0.234625	0.0633658	0.081566	0.012039	0.553257	0.0551467	116.339	18.502	27	3297
ODP1149	Seki et al. 2060	0.351376	0.0501572	0.0529733	0.0102203	0.499581	0.0356918	143.211	31.205	22.5	5817
ODP1173	Seki et al. 2061	0.244804	0.0555548	0.0580971	0.0121828	0.593976	0.0353861	135.151	32.147	22.9	4790
ODP1175	Seki et al. 2062	0.377937	0.0811327	0.0603019	0.00865376	0.450717	0.0212569	134.387	32.359	23.1	2997
ODP1178	Seki et al. 2063	0.287831	0.0702586	0.073828	0.0130501	0.513396	0.0416366	134.288	32.439	23.3	1741
ODP1179	Seki et al. 2064	0.464735	0.0628367	0.0273396	0.00403583	0.428375	0.012678	159.578	41.479	11.5	5565
ODP1202	Seki et al. 2065	0.29489	0.0557031	0.0675669	0.0141	0.528849	0.0388906	122.3	24.482	26.2	1274
ODP1207	Seki et al. 2066	0.356356	0.0487306	0.0363686	0.00417761	0.517435	0.0369316	162.451	37.474	17.1	3100
ODP1208	Seki et al. 2067	0.333859	0.056659	0.0510693	0.00797628	0.518008	0.0324284	158.121	36.763	18.3	3345
ODP1211	Seki et al. 2068	0.299009	0.0575216	0.0540484	0.00966414	0.538098	0.0416593	157.51	32.013	21.4	2907
ODP1212	Seki et al. 2069	0.302046	0.0583686	0.052342	0.00871145	0.540772	0.0377604	157.427	32.269	21.4	2682

## Sheet: OPTiMAL (Op2)
Calibration data the same as Op1 but EXCLUDING data from Seki et al. (2014) doi.org/10.1016/j.pocean.2014.04.013. In sensitivity tests to date (Sept. 2020) this has made little difference OPTiMAL SST estimation across a range of timescales and environments.
Core name	Source	GDGT-0	GDGT-1	GDGT-2	GDGT-3	Crenarchaeol	Cren'	longitude	latitude	Sea Surface Temp	water depth
1	Tierney and Tingley 2015	0.285	0.059	0.039	0.015	0.596	0.006	122.67	32	16	30
2	Tierney and Tingley 2015	0.283	0.065	0.043	0.022	0.587	0	123	32	16	37
3	Tierney and Tingley 2015	0.257	0.053	0.037	0.013	0.635	0.005	122.33	31.75	16.8	23
4	Tierney and Tingley 2015	0.3073	0.0561	0.041	0.014	0.5756	0.006	123	31.75	16.8	36
5	Tierney and Tingley 2015	0.3046	0.0581	0.0431	0.014	0.5731	0.007	123.33	31.75	17.8	33
6	Tierney and Tingley 2015	0.432	0.115	0.057	0.021	0.37	0.005	122.17	31.5	16.8	7
7	Tierney and Tingley 2015	0.449	0.029	0.015	0.005	0.5	0.002	122.33	31.5	16.8	16
8	Tierney and Tingley 2015	0.2667	0.0599	0.041	0.015	0.6094	0.008	122.5	31.5	16.8	28
9	Tierney and Tingley 2015	0.273	0.064	0.045	0.018	0.591	0.009	122.67	31.5	16.8	38
10	Tierney and Tingley 2015	0.2767	0.0629	0.043	0.016	0.5944	0.007	123	31.5	16.8	32
11	Tierney and Tingley 2015	0.283	0.05	0.034	0.012	0.613	0.008	122.5	31.5	16.8	22
12	Tierney and Tingley 2015	0.263	0.057	0.04	0.014	0.619	0.007	122.67	31.25	16.8	37
13	Tierney and Tingley 2015	0.2807	0.0599	0.049	0.017	0.5854	0.008	122	31.25	16.8	7
14	Tierney and Tingley 2015	0.273	0.059	0.044	0.015	0.602	0.007	122.17	31	16.8	8
15	Tierney and Tingley 2015	0.2687	0.0519	0.038	0.013	0.6214	0.007	122.33	31	16.8	8
16	Tierney and Tingley 2015	0.2677	0.0539	0.036	0.013	0.6224	0.007	122.67	31	16.8	20
17	Tierney and Tingley 2015	0.264	0.038	0.046	0.015	0.63	0.007	122	30.75	19.7	10
18	Tierney and Tingley 2015	0.2557	0.0529	0.037	0.014	0.6314	0.009	122.5	30.75	19.7	14
19	Tierney and Tingley 2015	0.27	0.06	0.041	0.015	0.606	0.008	122.67	30.75	19.7	38
20	Tierney and Tingley 2015	0.4456	0.0639	0.0639	0.022	0.3896	0.015	123	30.75	19.7	46
20	Tierney and Tingley 2015	0.2882	0.0808	0.0861	0.0141	0.4886	0.0422	-48.35	4.04	27.4	1088
21	Tierney and Tingley 2015	0.278	0.056	0.043	0.015	0.601	0.007	122	31	16.8	11
21	Tierney and Tingley 2015	0.2606	0.0745	0.0824	0.0133	0.5319	0.0372	-48.54	3.96	27.4	738
22	Tierney and Tingley 2015	0.2322	0.0521	0.042	0.015	0.6517	0.007	122.33	30.5	19.7	24
23	Tierney and Tingley 2015	0.243	0.055	0.04	0.014	0.64	0.008	122.67	30.5	19.7	33
23	Tierney and Tingley 2015	0.2993	0.0743	0.075	0.0102	0.5085	0.0327	-49.06	3.68	27.5	107
24	Tierney and Tingley 2015	0.3606	0.0599	0.038	0.014	0.5175	0.01	124.5	32	17.7	39
25	Tierney and Tingley 2015	0.3263	0.0581	0.039	0.013	0.5546	0.009	125	32	17.8	47
25	Tierney and Tingley 2015	0.1533	0.0499	0.072	0.0441	0.6527	0.0279	-49.86	3.19	27.5	32
26	Tierney and Tingley 2015	0.295	0.052	0.035	0.011	0.6	0.007	124.5	31.5	17.7	44
27	Tierney and Tingley 2015	0.272	0.056	0.04	0.014	0.607	0.011	125	31.5	17.7	48
28	Tierney and Tingley 2015	0.2448	0.0569	0.041	0.015	0.6354	0.007	122.5	31	19.7	18
29	Tierney and Tingley 2015	0.2378	0.0559	0.043	0.016	0.6394	0.008	122.5	30	20.2	18
30	Tierney and Tingley 2015	0.269	0.063	0.047	0.017	0.594	0.01	124.5	30	20.5	68
31	Tierney and Tingley 2015	0.2478	0.0629	0.047	0.018	0.6114	0.013	123.11	29.47	20.8	63
32	Tierney and Tingley 2015	0.241	0.063	0.048	0.018	0.615	0.015	123.38	29.32	20.8	71
33	Tierney and Tingley 2015	0.2527	0.0649	0.049	0.018	0.6014	0.014	123.8	29.09	20.8	77
34	Tierney and Tingley 2015	0.241	0.062	0.046	0.017	0.62	0.014	122.43	28.29	21.6	66
35	Tierney and Tingley 2015	0.39	0.054	0.03	0.01	0.509	0.007	123.01	33	16.7	32
36	Tierney and Tingley 2015	0.387	0.056	0.029	0.011	0.512	0.005	119.67	35	13.9	21
37	Tierney and Tingley 2015	0.424	0.042	0.019	0.006	0.505	0.004	121	35	13.9	37
38	Tierney and Tingley 2015	0.428	0.035	0.016	0.005	0.512	0.004	123.5	35.01	15.4	77
39	Tierney and Tingley 2015	0.432	0.041	0.02	0.005	0.498	0.004	121.99	36	15.2	39
40	Tierney and Tingley 2015	0.3197	0.047	0.027	0.009	0.5914	0.006	124.01	33.01	17.5	49
41	Tierney and Tingley 2015	0.4625	0.03	0.012	0.004	0.4885	0.003	124	36	14.9	77
42	Tierney and Tingley 2015	0.471	0.031	0.013	0.004	0.478	0.003	125.12	36.92	13.8	51
43	Tierney and Tingley 2015	0.4635	0.025	0.009	0.004	0.4965	0.002	124.12	36.92	14.6	76
43	Tierney and Tingley 2015	0.0894	0.0531	0.0761	0.0534	0.7057	0.0224	-48.05	2.09	27.8	65
44	Tierney and Tingley 2015	0.521	0.03	0.015	0.005	0.426	0.003	123.62	36.92	14.9	72
45	Tierney and Tingley 2015	0.436	0.027	0.01	0.004	0.519	0.004	125.03	35.85	14.9	53
46	Tierney and Tingley 2015	0.39	0.04	0.023	0.007	0.535	0.005	124.03	35.85	15.2	77
47	Tierney and Tingley 2015	0.391	0.034	0.016	0.005	0.551	0.003	121.53	35.85	15.2	38
48	Tierney and Tingley 2015	0.4264	0.033	0.014	0.004	0.5185	0.004	124.82	34.72	15.7	81
49	Tierney and Tingley 2015	0.4625	0.034	0.015	0.005	0.4795	0.004	123.52	34.72	16	77
49	Tierney and Tingley 2015	0.3023	0.0766	0.0766	0.0104	0.5031	0.0311	-45.36	1.64	27.4	-999
50	Tierney and Tingley 2015	0.39	0.031	0.013	0.004	0.56	0.002	121.53	34.72	15.2	42
51	Tierney and Tingley 2015	0.3666	0.042	0.023	0.006	0.5594	0.003	121.03	34.72	15.2	23
52	Tierney and Tingley 2015	0.385	0.069	0.044	0.015	0.477	0.01	125	32.5	17.8	58
53	Tierney and Tingley 2015	0.4016	0.0619	0.034	0.012	0.4815	0.009	125.53	33.57	18	87
54	Tierney and Tingley 2015	0.421	0.055	0.028	0.006	0.481	0.009	124.03	33.57	17.5	71
54	Tierney and Tingley 2015	0.3659	0.064	0.0579	0.0091	0.4787	0.0244	-44.35	0.66	27.4	2372
55	Tierney and Tingley 2015	0.4494	0.043	0.02	0.007	0.4745	0.006	123.53	33.57	16.7	66
56	Tierney and Tingley 2015	0.3734	0.038	0.019	0.006	0.5596	0.004	122.53	33.57	15.8	39
57	Tierney and Tingley 2015	0.3257	0.046	0.029	0.009	0.5864	0.004	122.03	33.57	15.8	24
58	Tierney and Tingley 2015	0.247	0.053	0.044	0.011	0.641	0.004	121.53	33.57	15.1	17
13a	Tierney and Tingley 2015	0.2947	0.0801	0.0883	0.0154	0.4795	0.0421	-48.61	4.46	27.4	1711
22b	Tierney and Tingley 2015	0.2995	0.0887	0.0973	0.0171	0.4548	0.0427	-48.61	3.95	27.4	640
28b	Tierney and Tingley 2015	0.2737	0.0721	0.0792	0.0113	0.5283	0.0354	-48.17	3.78	27.4	1014
32b	Tierney and Tingley 2015	0.272	0.0772	0.0868	0.0127	0.5111	0.0402	-47.64	3.07	27.3	1028
32c	Tierney and Tingley 2015	0.2705	0.0691	0.0763	0.0115	0.5381	0.0345	-47.31	3.65	27.3	2079
42b	Tierney and Tingley 2015	0.2693	0.0666	0.0712	0.0155	0.5433	0.0341	-47.74	2.85	27.3	609
42d	Tierney and Tingley 2015	0.1235	0.0671	0.0859	0.0494	0.6459	0.0282	-47.85	2.57	27.3	110
44c	Tierney and Tingley 2015	0.277	0.0741	0.0748	0.0104	0.5281	0.0356	-46.25	3.39	27.4	3375
60b	Tierney and Tingley 2015	0.2872	0.0749	0.0769	0.0103	0.519	0.0318	-42.74	-1.03	27.1	3113
A5	Tierney and Tingley 2015	0.17	0.0597	0.0518	0.0159	0.6826	0.0201	114.98	20.9958	25.8	102
A7	Tierney and Tingley 2015	0.1943	0.0548	0.0397	0.0136	0.6863	0.0114	114.501	21.5033	25.1	73
A9	Tierney and Tingley 2015	0.2156	0.0465	0.0297	0.0111	0.69	0.007	113.999	22.0083	25.1	33
AII-107-6-17	Tierney and Tingley 2015	0.5008	0.0565	0.0232	0.0054	0.4006	0.0134	-22.182	-55.278	0.8	3926
AII-107-6-18	Tierney and Tingley 2015	0.4994	0.06	0.0267	0.0046	0.3962	0.0132	-21.975	-55.27	1	4119
AII-107-6-20	Tierney and Tingley 2015	0.4539	0.0613	0.0295	0.0065	0.4284	0.0205	-17.952	-54.857	1.8	4119
AII-107-6-24	Tierney and Tingley 2015	0.5112	0.0676	0.0207	0.0032	0.3883	0.0091	-8.718	-54.857	0.8	3255
AII-107-6-27	Tierney and Tingley 2015	0.5152	0.0698	0.0209	0.0042	0.3832	0.0068	-3.518	-54.753	0.7	2921
AII-107-6-70	Tierney and Tingley 2015	0.4745	0.0658	0.0303	0.0053	0.4134	0.0106	7.763	-47.535	5.3	2473
AII-107-6-72	Tierney and Tingley 2015	0.4833	0.0662	0.032	0.0052	0.4039	0.0096	8.008	-46.822	6.5	2270
AII-GGC-22	Tierney and Tingley 2015	0.5461	0.0608	0.0197	0.0034	0.3622	0.0078	-3.33	-54.792	0.7	2768
AII-GGC-28	Tierney and Tingley 2015	0.5143	0.06	0.0249	0.0031	0.3896	0.0081	7.542	-46.875	6.1	2517
AII-GGC-9	Tierney and Tingley 2015	0.5326	0.0502	0.0167	0.0032	0.39	0.0072	-32.498	-56.195	1	3223
All-093-19-96	Tierney and Tingley 2015	0.1332	0.057	0.0874	0.0257	0.6258	0.071	34.572	28.535	25.3	963
AMR-1	Tierney and Tingley 2015	0.5512	0.0341	0.0123	0.0028	0.3872	0.0124	140.237	-63.855	-0.4	3726
AMR-2	Tierney and Tingley 2015	0.5317	0.0322	0.011	0.0028	0.4109	0.0113	139.978	-64.658	-0.2	2948
BOFS 5K 0-1	Tierney and Tingley 2015	0.4118	0.0705	0.0414	0.0051	0.4522	0.0189	-21.688	50.865	12.8	3547
BOFS 8K 0-1	Tierney and Tingley 2015	0.4591	0.0754	0.0396	0.0064	0.4033	0.0162	-22.04	52.5	12.3	4045
BP00-02	Tierney and Tingley 2015	0.4733	0.023	0.0092	0.0054	0.4846	0.0045	74.0033	75.4019	1.4	50
BP00-26	Tierney and Tingley 2015	0.4866	0.0212	0.0084	0.0047	0.475	0.0039	77.9598	75.7085	1.8	68
BP00-36/04	Tierney and Tingley 2015	0.4956	0.0206	0.009	0.0056	0.4655	0.0037	81.9632	76.9618	1.1	66
BP00-38	Tierney and Tingley 2015	0.4699	0.0278	0.0107	0.0075	0.4794	0.0048	73.2385	73.1968	1.7	20
BP01-61	Tierney and Tingley 2015	0.489	0.0213	0.0101	0.0061	0.4694	0.0042	75.8825	76.2156	1	111
BP97-19	Tierney and Tingley 2015	0.4749	0.0222	0.0072	0.0049	0.4865	0.0042	79.0245	74.0007	2.3	30
BP97-32	Tierney and Tingley 2015	0.5341	0.0683	0.0264	0.015	0.346	0.0102	81.4812	72.0932	1.7	10
BP97-35	Tierney and Tingley 2015	0.4968	0.0465	0.015	0.0106	0.4235	0.0075	80.3287	72.5087	1.7	14
BP97-39	Tierney and Tingley 2015	0.4759	0.023	0.0075	0.0063	0.4828	0.0046	79.9175	73.536	1.7	40
BP97-47	Tierney and Tingley 2015	0.4965	0.0358	0.0139	0.0097	0.4392	0.0049	73.7485	72.5835	3.3	18
BP97-49	Tierney and Tingley 2015	0.4828	0.0245	0.0088	0.0071	0.4716	0.0053	72.8947	73.2095	1.5	29
BP97-50	Tierney and Tingley 2015	0.4912	0.0224	0.0065	0.0061	0.4691	0.0046	72.9513	73.611	1.5	28
BP97-52	Tierney and Tingley 2015	0.4835	0.0209	0.0066	0.0065	0.4772	0.0053	72.662	74.0003	2	30
BP99-08	Tierney and Tingley 2015	0.474	0.0293	0.012	0.0067	0.4721	0.0059	79.9897	72.9295	1.7	35
BP99-13	Tierney and Tingley 2015	0.4697	0.0199	0.0079	0.0049	0.494	0.0036	78	74.4973	3.4	36
BP99-18	Tierney and Tingley 2015	0.4941	0.0457	0.0186	0.011	0.4258	0.0048	74	72.333	3.3	35
BP99-19	Tierney and Tingley 2015	0.4859	0.0464	0.0213	0.0103	0.4297	0.0064	74.1858	72.189	3.3	35
BP99-20	Tierney and Tingley 2015	0.4871	0.034	0.0137	0.0082	0.4524	0.0046	74.7317	72.5135	3.3	35
BP99-25	Tierney and Tingley 2015	0.4646	0.0232	0.0079	0.0067	0.4926	0.0049	73.996	74.001	3.6	35
BP99-31	Tierney and Tingley 2015	0.4764	0.0375	0.015	0.0082	0.457	0.0059	79.761	72.486	1.7	35
BP99-32	Tierney and Tingley 2015	0.4773	0.0249	0.0099	0.0061	0.4778	0.004	79.954	73.1345	1.7	35
BP99-35	Tierney and Tingley 2015	0.46	0.0202	0.0055	0.0055	0.5034	0.0055	78.334	74.3008	2.4	29
BP99-37	Tierney and Tingley 2015	0.4788	0.0227	0.0076	0.0065	0.4791	0.0053	74.3342	74.3005	2.9	35
BS 01E-27	Tierney and Tingley 2015	0.4482	0.0434	0.0254	0.0116	0.4596	0.0118	29.5	45.5	13.3	27
BS 02E-105	Tierney and Tingley 2015	0.3918	0.0361	0.0134	0.0053	0.5428	0.0107	32	45	13.4	105
BS 04E-114	Tierney and Tingley 2015	0.3767	0.0369	0.0147	0.0061	0.5565	0.0091	30	44.5	13.8	114
BS 05E-564	Tierney and Tingley 2015	0.4058	0.0328	0.015	0.0035	0.5319	0.0109	30.5	44	14.4	564
BS 06E-335	Tierney and Tingley 2015	0.3819	0.0332	0.0175	0.0035	0.5527	0.0111	35	44.5	14.8	335
BS 07E-1288	Tierney and Tingley 2015	0.4148	0.0306	0.0141	0.0038	0.529	0.0078	34	44	14.2	1288
BS 09E-2129	Tierney and Tingley 2015	0.365	0.0368	0.0218	0.0055	0.5582	0.0128	34	45.5	14.1	2129
BS2 Arkona basin	Tierney and Tingley 2015	0.3462	0.0186	0.0065	0.0035	0.6216	0.0035	14.712	54.621	8.9	47
BS3	Tierney and Tingley 2015	0.4688	0.0233	0.0078	0.0029	0.4936	0.0036	16.712	55.621	8.4	66
BS4 Gotland deep	Tierney and Tingley 2015	0.4519	0.018	0.0066	0.0026	0.5173	0.0036	19.712	57.621	7.8	115
BS5 Gotland deep	Tierney and Tingley 2015	0.4333	0.0216	0.0072	0.0022	0.5319	0.0037	20.712	57.621	7.8	240
BS6 Baltic proper	Tierney and Tingley 2015	0.4062	0.0218	0.0077	0.0021	0.558	0.0042	20.712	58.621	7.7	175
BS625	Tierney and Tingley 2015	0.5419	0.0398	0.0117	0.0053	0.3975	0.0038	21.75	71.721	6.6	360
BS627	Tierney and Tingley 2015	0.5492	0.0329	0.0092	0.0042	0.4016	0.003	24.048	72.322	5.9	264
BS629	Tierney and Tingley 2015	0.5574	0.0261	0.0077	0.0037	0.4023	0.0028	24.251	73	5	404
BS631	Tierney and Tingley 2015	0.5517	0.0195	0.0057	0.0031	0.4178	0.0023	24.46	73.663	5	451
BS633	Tierney and Tingley 2015	0.5591	0.0189	0.006	0.0033	0.4106	0.0021	24.683	74.331	2.9	373
BS635	Tierney and Tingley 2015	0.4776	0.0135	0.0043	0.0029	0.4994	0.0022	24.938	75.001	0.5	182
BS639	Tierney and Tingley 2015	0.4971	0.0142	0.0045	0.0029	0.4794	0.0018	27.893	75.563	1.8	263
BS643	Tierney and Tingley 2015	0.5258	0.0148	0.0043	0.0026	0.4504	0.0021	29.905	76.486	0.7	291
BS645	Tierney and Tingley 2015	0.5124	0.0145	0.0044	0.0027	0.464	0.002	29.45	75.853	2.1	296
BS647	Tierney and Tingley 2015	0.5067	0.0153	0.0047	0.0028	0.4683	0.0023	29	75.201	2	343
BS649	Tierney and Tingley 2015	0.55	0.0172	0.0052	0.003	0.4225	0.002	28.566	74.535	3.8	394
BS651	Tierney and Tingley 2015	0.5596	0.0176	0.0053	0.0031	0.4126	0.0017	26.065	74.63	3.7	317
BS653	Tierney and Tingley 2015	0.5515	0.0198	0.0058	0.0031	0.4178	0.0021	25.798	73.972	4.8	441
BS655	Tierney and Tingley 2015	0.5642	0.0242	0.0068	0.0034	0.3991	0.0022	25.532	73.297	4.8	412
BS657	Tierney and Tingley 2015	0.5486	0.0281	0.0091	0.0042	0.4072	0.0028	25.269	72.634	5.7	268
BS659	Tierney and Tingley 2015	0.5421	0.0341	0.0104	0.0047	0.4057	0.0029	25.047	71.972	6.2	256
BS661	Tierney and Tingley 2015	0.5258	0.0389	0.0118	0.0053	0.4145	0.0037	22.758	71.371	6.4	408
BS665	Tierney and Tingley 2015	0.5436	0.0282	0.0085	0.0042	0.4126	0.0031	28.399	72.167	5.4	289
BS667	Tierney and Tingley 2015	0.5681	0.0274	0.0084	0.0037	0.3898	0.0026	28.754	72.832	5.4	305
BS669	Tierney and Tingley 2015	0.5527	0.021	0.0062	0.0032	0.4143	0.0025	29.146	73.501	4.7	414
BS671	Tierney and Tingley 2015	0.5431	0.019	0.0057	0.0032	0.4267	0.0024	-1.315	62.643	8.6	1702
BS673	Tierney and Tingley 2015	0.4712	0.0125	0.0042	0.003	0.5069	0.0022	32.49	74.667	2.9	165
BS675	Tierney and Tingley 2015	0.4798	0.0127	0.0042	0.003	0.4977	0.0025	33.069	75.315	2.1	209
BS677	Tierney and Tingley 2015	0.5127	0.0148	0.0048	0.0029	0.4624	0.0025	33.733	75.967	2.1	276
BS679	Tierney and Tingley 2015	0.5107	0.0158	0.0047	0.003	0.4639	0.0019	34.45	76.617	0.2	193
BS681	Tierney and Tingley 2015	0.5306	0.0154	0.0046	0.0027	0.4445	0.0021	37.167	76.433	0.7	249
BS690	Tierney and Tingley 2015	0.5295	0.0234	0.007	0.0035	0.4339	0.0028	30.947	71.013	5.8	283
BS692	Tierney and Tingley 2015	0.5183	0.0256	0.0078	0.0037	0.4415	0.003	31.712	70.621	5.5	252
BY31 Landsort deep	Tierney and Tingley 2015	0.4429	0.0215	0.0082	0.0025	0.5211	0.0038	18.712	58.621	7.3	466
BY310 Landsort deep oxic	Tierney and Tingley 2015	0.4957	0.0233	0.0073	0.0028	0.4676	0.0034	17.712	58.621	7.3	54
BY5 Bornholm	Tierney and Tingley 2015	0.4313	0.0234	0.0085	0.0028	0.5308	0.0032	15.712	55.621	8.4	89
Cariaco Basin	Tierney and Tingley 2015	0.1624	0.0651	0.0937	0.0237	0.6034	0.0516	-65.6	10.667	26.6
CB1 MC15	Tierney and Tingley 2015	0.434	0.0846	0.0547	0.0035	0.4062	0.0169	-128	46.75	12.2	2700
CB2 MC19	Tierney and Tingley 2015	0.4052	0.0704	0.0466	0.0037	0.4606	0.0135	-125.833	46.767	12.4	2700
CHN-043-1-4	Tierney and Tingley 2015	0.0894	0.0411	0.1019	0.0264	0.6366	0.1047	40.167	17.65	29.3	1470
CHN-043-1-5	Tierney and Tingley 2015	0.1397	0.0478	0.0931	0.0256	0.6034	0.0904	40.167	17.65	29.3	1296
CHN-115-4-34	Tierney and Tingley 2015	0.4471	0.0779	0.0337	0.0109	0.4201	0.0103	5.33	-51	2.4	3788
CHN-115-4-35	Tierney and Tingley 2015	0.5434	0.061	0.0192	0.0039	0.3655	0.0069	0.1	-53.6	0.7	2643
CHN-115-4-43	Tierney and Tingley 2015	0.4461	0.0578	0.0334	0.0096	0.4461	0.007	0.08	-54.592	-0.1	1260
CL03-35 BC	Tierney and Tingley 2015	0.4682	0.034	0.0127	0.0032	0.4773	0.0047	-58.712	46.621	6.3	370
D357 St. 0	Tierney and Tingley 2015	0.4141	0.0584	0.0268	0.0096	0.4683	0.0228	17.9736	-30.197	15.7	242
D357 St. 1	Tierney and Tingley 2015	0.3988	0.0759	0.0503	0.0078	0.4456	0.0217	17.0363	-34.6213	17.9	2620
D357 St. 11	Tierney and Tingley 2015	0.3716	0.0713	0.0544	0.0088	0.4631	0.0307	7.6704	-39.2945	12.8	5269
D357 St. 13	Tierney and Tingley 2015	0.399	0.0399	0.0267	0.005	0.516	0.0133	17.5695	-34.3878	17.9	1168
D357 St. 3	Tierney and Tingley 2015	0.3508	0.0783	0.0623	0.0086	0.4705	0.0295	13.1091	-36.4956	18	4900
D357 St. 6	Tierney and Tingley 2015	0.412	0.0783	0.0462	0.0044	0.4412	0.018	0.9075	-40.0032	11.3	4928
D357 St. 8	Tierney and Tingley 2015	0.3792	0.0549	0.0283	0.0069	0.5121	0.0186	17.9736	-34.3263	17.9	733
DNT05-22 BEN	Tierney and Tingley 2015	0.4634	0.0432	0.0123	0.005	0.4733	0.0029	-58.712	46.621	6.3	18
Drammensfjord D0-5	Tierney and Tingley 2015	0.4901	0.0251	0.0099	0.0035	0.467	0.0043	10.423	59.633	9.1	100
Drammensfjord-1	Tierney and Tingley 2015	0.4948	0.0346	0.0172	0.004	0.4445	0.0049	10.396	59.668	9.1	100
Drammensfjord-2	Tierney and Tingley 2015	0.4901	0.0251	0.0099	0.0035	0.467	0.0043	10.423	59.633	9.1	110
ENAM9407	Tierney and Tingley 2015	0.528	0.0321	0.0098	0.0035	0.4216	0.0049	-4.032	62.956	8	2060
Frisian Front	Tierney and Tingley 2015	0.4632	0.0393	0.0171	0.0058	0.471	0.0034	4.5	53.7	10.6	34
G2-85 7 0-1	Tierney and Tingley 2015	0.242	0.0689	0.0672	0.0181	0.5573	0.0464	123.595	-9.003	28.1	-999
G2-85 pist 0-1	Tierney and Tingley 2015	0.2343	0.0718	0.072	0.0195	0.5564	0.0459	123.64	-8.99	28.1	-999
G2-9 box 0-1	Tierney and Tingley 2015	0.2236	0.0732	0.0777	0.0195	0.5465	0.0595	123.592	-9.343	28.1	2720
G2-9 trp 0-1	Tierney and Tingley 2015	0.2023	0.0696	0.0813	0.0179	0.5764	0.0524	123.592	-9.34	28.1	2720
G6-3 0-1	Tierney and Tingley 2015	0.2366	0.0663	0.0781	0.0148	0.5488	0.0553	117.193	-10.152	28.3	1182
GeoB10016-2	Tierney and Tingley 2015	0.2172	0.0643	0.0942	0.0177	0.5573	0.0494	96.66	1.597	28.7	1900
GeoB10026-2	Tierney and Tingley 2015	0.2074	0.0763	0.1012	0.0184	0.5411	0.0556	99.521	-0.944	28.7	1641
GeoB10032-1	Tierney and Tingley 2015	0.2145	0.0729	0.0941	0.0179	0.5477	0.053	99.681	-1.667	28.7	1758
GeoB10034-3	Tierney and Tingley 2015	0.2311	0.0734	0.0933	0.017	0.5364	0.0488	101.499	-4.165	28.2	995
GeoB10038-3	Tierney and Tingley 2015	0.2877	0.0702	0.0831	0.014	0.503	0.0419	103.246	-5.937	27.6	1891
GeoB10040-3	Tierney and Tingley 2015	0.2899	0.0724	0.0829	0.0143	0.4977	0.0427	102.859	-6.476	27.9	2605
GeoB10042-2	Tierney and Tingley 2015	0.2477	0.071	0.0803	0.0187	0.5368	0.0455	104.643	-7.113	28	2457
GeoB10701-4	Tierney and Tingley 2015	0.285	0.074	0.08	0.015	0.515	0.031	17.467	40	18.9	1186
GeoB10703-3	Tierney and Tingley 2015	0.356	0.054	0.04	0.01	0.509	0.03	17.742	40	18.9	277
GeoB10704-3	Tierney and Tingley 2015	0.356	0.062	0.038	0.013	0.521	0.01	17.833	40	18.9	219
GeoB10705-3	Tierney and Tingley 2015	0.354	0.062	0.039	0.011	0.525	0.009	17.913	39.853	18.9	128
GeoB10707-4	Tierney and Tingley 2015	0.295	0.064	0.064	0.011	0.54	0.026	17.583	39.783	18.9	1598
GeoB10708-3	Tierney and Tingley 2015	0.306	0.07	0.061	0.011	0.533	0.02	17.733	39.808	18.9	686
GeoB10709-4	Tierney and Tingley 2015	0.363	0.059	0.036	0.01	0.516	0.016	17.893	39.757	18.9	173
GeoB10710-4	Tierney and Tingley 2015	0.298	0.067	0.065	0.011	0.527	0.031	17.683	39.592	18.9	2040
GeoB10711-3	Tierney and Tingley 2015	0.293	0.073	0.067	0.014	0.52	0.035	17.8	39.683	18.9	1049
GeoB10712-3	Tierney and Tingley 2015	0.328	0.063	0.054	0.012	0.519	0.024	17.862	39.727	18.9	618
GeoB10713-3	Tierney and Tingley 2015	0.37	0.059	0.039	0.014	0.507	0.012	18.283	39.692	18.9	127
GeoB10714-3	Tierney and Tingley 2015	0.34	0.066	0.044	0.012	0.521	0.017	18.283	39.64	18.9	207
GeoB10715-3	Tierney and Tingley 2015	0.274	0.078	0.066	0.014	0.537	0.03	18.283	39.559	18.9	697
GeoB10716-3	Tierney and Tingley 2015	0.275	0.071	0.076	0.011	0.523	0.044	18.283	39.345	18.9	1328
GeoB10717-3	Tierney and Tingley 2015	0.359	0.063	0.036	0.013	0.524	0.005	18.08	39.742	18.9	96
GeoB10718-3	Tierney and Tingley 2015	0.347	0.066	0.039	0.013	0.525	0.01	18.058	39.693	18.9	219
GeoB10719-3	Tierney and Tingley 2015	0.302	0.068	0.055	0.013	0.528	0.034	18.042	39.653	18.9	616
GeoB10720-5	Tierney and Tingley 2015	0.253	0.095	0.087	0.012	0.503	0.051	17.978	39.507	18.9	1387
GeoB10721-3	Tierney and Tingley 2015	0.34	0.069	0.046	0.013	0.516	0.015	16.767	42.166	18.1	203
GeoB10722-3	Tierney and Tingley 2015	0.371	0.069	0.037	0.012	0.503	0.008	16.5	42.167	18.1	142
GeoB10723-3	Tierney and Tingley 2015	0.375	0.058	0.029	0.011	0.51	0.017	16	42.167	17.8	114
GeoB10724-3	Tierney and Tingley 2015	0.387	0.052	0.023	0.01	0.51	0.018	16.217	42.001	18.1	50
GeoB10725-3	Tierney and Tingley 2015	0.403	0.048	0.021	0.009	0.507	0.011	16.216	42.05	18.1	94
GeoB10726-3	Tierney and Tingley 2015	0.382	0.051	0.024	0.008	0.526	0.009	16.717	42	18.1	183
GeoB10727-3	Tierney and Tingley 2015	0.373	0.067	0.029	0.01	0.511	0.01	16.617	41.801	18.1	101
GeoB10728-3	Tierney and Tingley 2015	0.351	0.072	0.048	0.013	0.496	0.02	16.858	41.783	18.1	194
GeoB10729-4	Tierney and Tingley 2015	0.305	0.071	0.057	0.014	0.525	0.029	17.191	41.647	18.1	712
GeoB10730-3	Tierney and Tingley 2015	0.326	0.073	0.048	0.013	0.527	0.012	17.05	41.5	18.1	183
GeoB10731-3	Tierney and Tingley 2015	0.377	0.055	0.027	0.009	0.523	0.01	16.658	41.5	18.1	96
GeoB10732-3	Tierney and Tingley 2015	0.376	0.046	0.019	0.007	0.549	0.003	16.407	41.5	18.1	51
GeoB10733-3	Tierney and Tingley 2015	0.379	0.055	0.029	0.01	0.522	0.006	16.225	41.5	18.1	22
GeoB10734-3	Tierney and Tingley 2015	0.382	0.044	0.021	0.008	0.54	0.005	16.242	41.667	18.1	18
GeoB10735-3	Tierney and Tingley 2015	0.305	0.07	0.059	0.012	0.528	0.025	17.308	41.5	18.1	733
GeoB10736-3	Tierney and Tingley 2015	0.356	0.062	0.035	0.011	0.524	0.013	18.192	40.758	18.8	123
GeoB10737-3	Tierney and Tingley 2015	0.37	0.06	0.034	0.01	0.515	0.01	18.329	40.625	18.8	113
GeoB10738-3	Tierney and Tingley 2015	0.357	0.061	0.035	0.013	0.511	0.023	18.467	40.546	18.8	112
GeoB10739-3	Tierney and Tingley 2015	0.324	0.07	0.051	0.011	0.521	0.023	18.642	40.5	18.8	565
GeoB10740-3	Tierney and Tingley 2015	0.345	0.062	0.037	0.012	0.531	0.011	18.583	40.392	18.9	128
GeoB10741-3	Tierney and Tingley 2015	0.352	0.063	0.039	0.011	0.521	0.013	18.667	40.233	18.9	287
GeoB10742-3	Tierney and Tingley 2015	0.3	0.07	0.059	0.012	0.534	0.024	18.776	39.716	18.9	599
GeoB10743-3	Tierney and Tingley 2015	0.346	0.061	0.04	0.014	0.539	0	18.642	39.825	18.9	124
GeoB10744-3	Tierney and Tingley 2015	0.341	0.063	0.038	0.012	0.535	0.011	18.6	39.85	18.9	117
GeoB10746-3	Tierney and Tingley 2015	0.338	0.062	0.037	0.011	0.539	0.014	16.758	39.908	18.9	157
GeoB10747-3	Tierney and Tingley 2015	0.323	0.064	0.041	0.013	0.54	0.018	16.975	39.725	18.9	246
GeoB10748-3	Tierney and Tingley 2015	0.328	0.065	0.05	0.012	0.53	0.016	17.05	39.667	18.9	288
GeoB10749-3	Tierney and Tingley 2015	0.308	0.07	0.049	0.012	0.533	0.027	17.183	39.6	18.9	278
GeoB1501-1	Tierney and Tingley 2015	0.3144	0.0844	0.0815	0.0081	0.4764	0.0351	-32.012	-3.682	27.3	4258
GeoB1503-2	Tierney and Tingley 2015	0.3162	0.0822	0.0802	0.0082	0.4808	0.0323	-30.648	2.31	27.6	2298
GeoB1504-1	Tierney and Tingley 2015	0.3121	0.0806	0.0769	0.0082	0.4872	0.035	-31.287	2.288	27.5	2980
GeoB1506-1	Tierney and Tingley 2015	0.3076	0.0823	0.0772	0.0078	0.4888	0.0364	-35.182	2.205	27.6	4267
GeoB1515-2	Tierney and Tingley 2015	0.2972	0.0815	0.0797	0.0101	0.4949	0.0367	-43.665	4.238	27.6	3125
GeoB2022-3	Tierney and Tingley 2015	0.365	0.0852	0.0687	0.0081	0.4466	0.0263	-20.908	-34.435	18.6	4016
GeoB2102-1	Tierney and Tingley 2015	0.2721	0.0665	0.0771	0.0113	0.5377	0.0353	-41.2	-23.983	23.5	1805
GeoB2104-1	Tierney and Tingley 2015	0.2617	0.0694	0.0823	0.0114	0.5358	0.0394	-46.378	-27.29	23.7	1505
GeoB2105-3	Tierney and Tingley 2015	0.2664	0.0732	0.0655	0.0155	0.5539	0.0254	-46.738	-26.738	23.9	202
GeoB2106-1	Tierney and Tingley 2015	0.2959	0.0673	0.0659	0.0116	0.5305	0.0287	-46.497	-27.098	23.7	502
GeoB2107-5	Tierney and Tingley 2015	0.2723	0.0701	0.0783	0.0116	0.5336	0.034	-46.457	-27.18	23.7	1052
GeoB2108-1	Tierney and Tingley 2015	0.291	0.0743	0.0832	0.0112	0.5028	0.0375	-46.23	-27.487	23.7	1991
GeoB2110-1	Tierney and Tingley 2015	0.2828	0.0708	0.0856	0.0099	0.5122	0.0387	-45.522	-28.65	23.5	3003
GeoB2111-2	Tierney and Tingley 2015	0.2889	0.0728	0.0821	0.0091	0.5099	0.0373	-45.223	-29.112	22.8	3498
GeoB2112-1	Tierney and Tingley 2015	0.2884	0.0715	0.0768	0.0085	0.5167	0.038	-43.377	-29.135	22.1	4009
GeoB2124-1	Tierney and Tingley 2015	0.2759	0.0677	0.0842	0.0104	0.5269	0.0349	-39.56	-20.958	25.7	2003
GeoB2125-2	Tierney and Tingley 2015	0.275	0.0652	0.0749	0.0116	0.5395	0.0339	-39.857	-20.82	25.7	1542
GeoB2126-1	Tierney and Tingley 2015	0.2909	0.0713	0.0872	0.0114	0.5001	0.0391	-38.933	-21.27	25.5	2537
GeoB2130-1	Tierney and Tingley 2015	0.2993	0.0748	0.0931	0.0179	0.4775	0.0375	-37.103	-20.615	26	2113
GeoB2201-1	Tierney and Tingley 2015	0.2506	0.0651	0.086	0.0175	0.5453	0.0355	-34.463	-8.168	27.3	794
GeoB2202-5	Tierney and Tingley 2015	0.2394	0.0902	0.1557	0.017	0.4646	0.0331	-34.263	-8.197	27.3	1128
GeoB2205-4	Tierney and Tingley 2015	0.2596	0.073	0.0907	0.0098	0.5291	0.0378	-34.345	-8.573	27.3	1790
GeoB2206-1	Tierney and Tingley 2015	0.2633	0.0712	0.0948	0.0125	0.5182	0.0399	-34.48	-8.558	27.3	1442
GeoB2207-2	Tierney and Tingley 2015	0.2739	0.0812	0.0915	0.0084	0.5085	0.0365	-34.135	-8.735	27.3	2585
GeoB2208-1	Tierney and Tingley 2015	0.3274	0.082	0.0749	0.0062	0.4784	0.0311	-33.7	-8.917	27.3	3977
GeoB2212-1	Tierney and Tingley 2015	0.3427	0.0851	0.0742	0.006	0.4574	0.0346	-25.623	-4.032	26.7	5521
GeoB2213-1	Tierney and Tingley 2015	0.3134	0.0815	0.0733	0.0072	0.4908	0.0339	-24.153	-1.265	26.6	4323
GeoB2215-8	Tierney and Tingley 2015	0.3102	0.0802	0.0721	0.008	0.4944	0.035	-23.492	0.008	26.7	3712
GeoB2216-2	Tierney and Tingley 2015	0.2957	0.0806	0.0734	0.0076	0.5073	0.0353	-23.102	0	26.5	3914
GeoB2701-4	Tierney and Tingley 2015	0.4195	0.0191	0.0068	0.0027	0.5476	0.0043	-53.982	-37.207	16.5	1007
GeoB2703-7	Tierney and Tingley 2015	0.4874	0.0398	0.0176	0.0039	0.4446	0.0068	-54.202	-38.513	12.4	1162
GeoB2705-7	Tierney and Tingley 2015	0.4707	0.0557	0.0293	0.0046	0.4292	0.0106	-53.363	-39.243	14.6	4474
GeoB2706-6	Tierney and Tingley 2015	0.4808	0.0622	0.0283	0.0039	0.4142	0.0107	-55.535	-42.368	11.2	4700
GeoB2707-4	Tierney and Tingley 2015	0.499	0.0543	0.022	0.0032	0.414	0.0075	-56.323	-41.945	9.3	3167
GeoB2708-5	Tierney and Tingley 2015	0.4296	0.0198	0.0067	0.0026	0.5367	0.0045	-57.3	-41.418	9	392
GeoB2712-1	Tierney and Tingley 2015	0.5234	0.041	0.0151	0.0031	0.4127	0.0047	-59.33	-43.675	9.7	1228
GeoB2714-5	Tierney and Tingley 2015	0.4995	0.0566	0.0223	0.0032	0.4111	0.0073	-57.997	-43.863	9.9	2361
GeoB2715-1	Tierney and Tingley 2015	0.5117	0.0607	0.0291	0.0035	0.3875	0.0074	-57.662	-43.903	9.9	3280
GeoB2717-8	Tierney and Tingley 2015	0.4928	0.0606	0.0248	0.0032	0.4093	0.0094	-56.487	-47.162	8.7	4479
GeoB2718-1	Tierney and Tingley 2015	0.4872	0.0603	0.0261	0.0035	0.4151	0.0077	-58.175	-47.307	7.7	2990
GeoB2719-3	Tierney and Tingley 2015	0.5404	0.0342	0.011	0.003	0.4074	0.004	-60.093	-47.442	8.2	684
GeoB2722-2	Tierney and Tingley 2015	0.5004	0.0613	0.0291	0.0035	0.3992	0.0065	-58.62	-47.327	7.7	2351
GeoB2723-2	Tierney and Tingley 2015	0.5261	0.0325	0.0108	0.0031	0.4232	0.0044	-57.875	-48.912	7.3	569
GeoB2724-7	Tierney and Tingley 2015	0.4948	0.0636	0.0262	0.0032	0.4035	0.0087	-56.175	-47.963	8.7	4799
GeoB2727-1	Tierney and Tingley 2015	0.4921	0.0592	0.0243	0.0035	0.413	0.008	-56.538	-48.013	7	2803
GeoB2730-1	Tierney and Tingley 2015	0.4738	0.0557	0.0254	0.0035	0.4314	0.0102	-53.248	-44.475	12.4	5817
GeoB2731-1	Tierney and Tingley 2015	0.4615	0.0566	0.0267	0.004	0.4393	0.012	-51.423	-44.207	13.2	5691
GeoB2734-2	Tierney and Tingley 2015	0.4995	0.0472	0.0191	0.0032	0.4247	0.0063	-54.342	-39.29	11.3	2272
GeoB2802-2	Tierney and Tingley 2015	0.4961	0.0324	0.014	0.0034	0.4481	0.006	-55.015	-37.807	13.3	576
GeoB2803-1	Tierney and Tingley 2015	0.4737	0.0377	0.0183	0.0039	0.4586	0.0078	-53.703	-37.407	16.5	1162
GeoB2804-2	Tierney and Tingley 2015	0.4645	0.0421	0.0229	0.0042	0.4577	0.0087	-53.537	-37.537	16.5	1836
GeoB2805-1	Tierney and Tingley 2015	0.4531	0.0447	0.0249	0.0043	0.4629	0.0101	-53.443	-37.605	16.5	2743
GeoB2806-6	Tierney and Tingley 2015	0.4456	0.0491	0.0308	0.0052	0.4567	0.0126	-53.137	-37.832	16.5	3542
GeoB2809-2	Tierney and Tingley 2015	0.4045	0.0532	0.0395	0.0061	0.4803	0.0163	-51.522	-36.332	19.6	3539
GeoB2810-2	Tierney and Tingley 2015	0.3929	0.0493	0.0382	0.0065	0.4964	0.0166	-51.978	-35.98	19.7	2909
GeoB2811-1	Tierney and Tingley 2015	0.4131	0.0395	0.0261	0.0052	0.5033	0.0128	-52.27	-35.753	17.1	1789
GeoB2812-3	Tierney and Tingley 2015	0.4058	0.0261	0.0137	0.0038	0.5438	0.0069	-52.387	-35.602	17.1	1041
GeoB2813-1	Tierney and Tingley 2015	0.4318	0.0238	0.011	0.0037	0.5242	0.0056	-52.562	-35.532	17.1	508
GeoB2817-3	Tierney and Tingley 2015	0.3201	0.0763	0.0744	0.0077	0.4886	0.0329	-40.97	-31.902	20.6	3959
GeoB2818-1	Tierney and Tingley 2015	0.314	0.077	0.078	0.008	0.4916	0.0314	-38.17	-30.873	22	3110
GeoB2819-2	Tierney and Tingley 2015	0.3167	0.0783	0.0765	0.0089	0.4847	0.0349	-38.343	-30.848	22	3435
GeoB2820-1	Tierney and Tingley 2015	0.3145	0.0813	0.0815	0.0078	0.4836	0.0312	-38.438	-30.822	22	3606
GeoB2821-2	Tierney and Tingley 2015	0.3173	0.0785	0.0759	0.0079	0.4876	0.0328	-38.817	-30.453	22	3936
GeoB2824-1	Tierney and Tingley 2015	0.3785	0.0674	0.0502	0.0068	0.4759	0.0212	-42.498	-33.498	20.4	4512
GeoB2825-3	Tierney and Tingley 2015	0.3717	0.0665	0.0514	0.0071	0.4784	0.0249	-41.432	-32.5	20.2	4352
GeoB2826-1	Tierney and Tingley 2015	0.3309	0.0693	0.0657	0.0081	0.4953	0.0307	-38.073	-30.915	22	2943
GeoB2827-2	Tierney and Tingley 2015	0.3176	0.0737	0.0723	0.0078	0.494	0.0346	-40.728	-31.478	20.6	3702
GeoB2828-1	Tierney and Tingley 2015	0.3088	0.075	0.0745	0.0079	0.5013	0.0325	-40.718	-31.475	20.6	3741
GeoB2829-3	Tierney and Tingley 2015	0.3037	0.0736	0.0781	0.0087	0.5005	0.0354	-43.43	-30.873	21	3523
GeoB2830-1	Tierney and Tingley 2015	0.2946	0.0728	0.0808	0.0081	0.5072	0.0364	-44	-29.02	21.9	3815
GeoB6402-9	Tierney and Tingley 2015	0.4372	0.0705	0.0388	0.0065	0.4328	0.0142	-22.757	-39.743	14.1	3878
GeoB6404-3	Tierney and Tingley 2015	0.4527	0.0684	0.0332	0.0047	0.4286	0.0123	-23.465	-41.506	13	4223
GeoB6405-8	Tierney and Tingley 2015	0.4499	0.0674	0.0338	0.0051	0.429	0.0148	-21.853	-42	13.6	3863
GeoB6406-1	Tierney and Tingley 2015	0.4576	0.0699	0.0346	0.005	0.4212	0.0117	-20.784	-42	11.3	3514
GeoB6407-2	Tierney and Tingley 2015	0.471	0.0684	0.0312	0.0043	0.4148	0.0103	-19.5	-42.045	11.5	3384
GeoB6408-3	Tierney and Tingley 2015	0.4704	0.0667	0.0294	0.0042	0.4186	0.0106	-20.441	-43.614	10.5	3797
GeoB6409-2	Tierney and Tingley 2015	0.5015	0.0642	0.0262	0.0034	0.3966	0.0081	-21.717	-44.507	9.6	4296
GeoB6409-3	Tierney and Tingley 2015	0.4709	0.0599	0.0316	0.0054	0.4166	0.0156	-21.717	-44.507	9.6	4296
GeoB6410-1	Tierney and Tingley 2015	0.4789	0.0648	0.0274	0.0034	0.4164	0.0091	-20.9	-44.517	9.8	4038
GeoB6412-1	Tierney and Tingley 2015	0.4968	0.057	0.0255	0.004	0.408	0.0087	-17.647	-44.254	9.4	3475
GeoB6413-4	Tierney and Tingley 2015	0.4786	0.0627	0.0271	0.0038	0.4189	0.009	-17.34	-44.207	9.4	3768
GeoB6414-1	Tierney and Tingley 2015	0.4871	0.0637	0.0288	0.0037	0.4077	0.0092	-13.07	-43.999	11	3830
GeoB6416-2	Tierney and Tingley 2015	0.4519	0.0693	0.0381	0.0059	0.4209	0.0138	-18.163	-39.955	13.4	3525
GeoB6417-2	Tierney and Tingley 2015	0.4224	0.0719	0.0401	0.0063	0.4443	0.015	-21.042	-39.093	14.2	4024
GeoB6418-3	Tierney and Tingley 2015	0.4194	0.0723	0.0417	0.0068	0.443	0.0169	-21.535	-38.427	13.3	4126
GeoB6419-1	Tierney and Tingley 2015	0.4392	0.0685	0.0436	0.009	0.4231	0.0166	-21.864	-37.774	18.5	3568
GeoB6420-2	Tierney and Tingley 2015	0.3929	0.0761	0.0488	0.0072	0.4567	0.0182	-22.148	-37.158	17.5	3998
GeoB6421-1	Tierney and Tingley 2015	0.3914	0.0745	0.0493	0.0083	0.4551	0.0214	-22.445	-36.448	16.4	4216
GeoB6422-5	Tierney and Tingley 2015	0.3763	0.0795	0.0581	0.0088	0.4554	0.0218	-22.733	-35.707	18.6	3972
GeoB6423-1	Tierney and Tingley 2015	0.3667	0.0766	0.057	0.009	0.4665	0.0241	-22.992	-35.253	18.6	3963
GeoB6424-2	Tierney and Tingley 2015	0.3562	0.077	0.0589	0.009	0.4729	0.0259	-23.276	-34.608	18.2	3820
GeoB6425-1	Tierney and Tingley 2015	0.3454	0.0798	0.0652	0.0086	0.4724	0.0286	-23.588	-33.825	19.7	4352
GeoB6426-2	Tierney and Tingley 2015	0.3397	0.0777	0.0655	0.0074	0.4826	0.0271	-24.024	-33.499	20	4381
GeoB6427-1	Tierney and Tingley 2015	0.3413	0.0762	0.0674	0.0072	0.4804	0.0274	-24.248	-33.182	20	4491
GeoB6428-3	Tierney and Tingley 2015	0.3272	0.0776	0.0693	0.0075	0.4883	0.0301	-24.248	-32.51	20.5	4022
GeoB6429-1	Tierney and Tingley 2015	0.2985	0.0751	0.0714	0.0113	0.5087	0.0351	-24.248	-31.95	21.4	4335
GeoB8301-5	Tierney and Tingley 2015	0.5178	0.0769	0.0496	0.0077	0.3303	0.0177	17.699	-34.775	17.9	1941
GeoB8303-5	Tierney and Tingley 2015	0.4635	0.0758	0.0502	0.0072	0.386	0.0173	16.785	-34.261	18.4	3447
GeoB8305-1	Tierney and Tingley 2015	0.4954	0.0649	0.0382	0.0068	0.3808	0.0138	17.177	-33.478	16	712
GeoB8306-1	Tierney and Tingley 2015	0.4806	0.0709	0.045	0.0071	0.381	0.0154	16.843	-33.741	18.1	1924
GeoB8307-5	Tierney and Tingley 2015	0.4551	0.0748	0.0494	0.0076	0.3951	0.0181	16.5	-33.834	18.1	2668
GeoB8308-2	Tierney and Tingley 2015	0.4523	0.078	0.053	0.0078	0.3906	0.0184	16.268	-33.92	18.1	3162
GeoB8310-1	Tierney and Tingley 2015	0.5038	0.0694	0.0417	0.007	0.3616	0.0165	16.382	-32.909	17.1	1995
GeoB8311-1	Tierney and Tingley 2015	0.492	0.0705	0.0454	0.0073	0.3674	0.0174	16.31	-32.365	17.1	2535
GeoB8313-1	Tierney and Tingley 2015	0.489	0.0726	0.0439	0.0073	0.3714	0.0157	15.944	-32.123	18.1	1090
GeoB8314-1	Tierney and Tingley 2015	0.496	0.0763	0.0457	0.0075	0.3585	0.016	15.813	-32.499	18.1	1977
GeoB8315-5	Tierney and Tingley 2015	0.463	0.0748	0.0507	0.0074	0.386	0.0181	15.695	-32.888	18.1	2996
GeoB8316-1	Tierney and Tingley 2015	0.4617	0.0768	0.0512	0.0074	0.3849	0.018	15.734	-32.74	18.1	2667
GeoB8317-1	Tierney and Tingley 2015	0.4508	0.0787	0.054	0.008	0.3891	0.0193	15.163	-32.329	18.1	2930
GeoB8318-1	Tierney and Tingley 2015	0.5819	0.0569	0.0244	0.0064	0.3203	0.0101	16.805	-32.152	17.1	307
GeoB8319-1	Tierney and Tingley 2015	0.5377	0.0359	0.015	0.0043	0.4024	0.0047	18.078	-32.496	14.9	69
GeoB8321-1	Tierney and Tingley 2015	0.5166	0.0393	0.0166	0.0045	0.4168	0.0062	18.117	-31.864	14.8	104
GeoB8322-1	Tierney and Tingley 2015	0.5209	0.0397	0.0165	0.0045	0.4129	0.0055	18.118	-31.954	14.8	105
GeoB8323-1	Tierney and Tingley 2015	0.5214	0.0378	0.0162	0.0046	0.4146	0.0055	18.222	-32.032	14.9	90
GeoB8324-1	Tierney and Tingley 2015	0.5263	0.04	0.0168	0.0048	0.406	0.0061	18.091	-31.747	14.8	100
GeoB8325-1	Tierney and Tingley 2015	0.5753	0.044	0.0186	0.0044	0.3512	0.0066	17.279	-30.595	15.7	134
GeoB8327-1	Tierney and Tingley 2015	0.5359	0.0411	0.0185	0.0049	0.3932	0.0063	17.007	-29.703	13.7	88
GeoB8328-1	Tierney and Tingley 2015	0.5259	0.0407	0.0177	0.0048	0.405	0.0059	17.058	-29.939	13.7	112
GeoB8329-1	Tierney and Tingley 2015	0.525	0.0403	0.0181	0.0049	0.4058	0.006	17.034	-29.928	13.7	111
GeoB8331-2	Tierney and Tingley 2015	0.5886	0.041	0.0156	0.005	0.3431	0.0066	15.9	80.5	0.9	350
GeoB8332-3	Tierney and Tingley 2015	0.5453	0.0395	0.0181	0.0052	0.3862	0.0058	16.66	-29.127	13.7	117
GeoB8333-1	Tierney and Tingley 2015	0.5575	0.0417	0.0182	0.0051	0.3713	0.0062	16.615	-29.122	13.7	20
GeoB8336-5	Tierney and Tingley 2015	0.4428	0.0903	0.06	0.0067	0.381	0.0192	12.344	-29.21	18.4	3626
GeoB8337-5	Tierney and Tingley 2015	0.4499	0.0844	0.0572	0.0069	0.3833	0.0183	13.178	-29.408	18	3079
GeoB8338-1	Tierney and Tingley 2015	0.4964	0.0737	0.042	0.0061	0.3665	0.0153	14.322	-29.5	17.2	915
GeoB8340-1	Tierney and Tingley 2015	0.4507	0.0713	0.042	0.0073	0.4137	0.015	14.825	-30.317	17.8	600
GeoB8342-5	Tierney and Tingley 2015	0.4297	0.0832	0.0607	0.0082	0.397	0.0212	13.001	-31.501	18.2	3521
GeoB8343-1	Tierney and Tingley 2015	0.4232	0.0835	0.0577	0.0079	0.4071	0.0206	13.325	-30.849	18.3	3089
GeoB9501-4	Tierney and Tingley 2015	0.3176	0.0607	0.0439	0.0161	0.5458	0.016	-16.733	16.843	23.5	330
GeoB9506-3	Tierney and Tingley 2015	0.3451	0.0751	0.0692	0.0088	0.4698	0.0321	-18.35	15.61	24.1	2964
GeoB9508-4	Tierney and Tingley 2015	0.3368	0.0779	0.0718	0.0091	0.4736	0.0308	-17.948	15.498	23.4	2385
GeoB9510-3	Tierney and Tingley 2015	0.3357	0.0793	0.0685	0.0101	0.477	0.0293	-17.653	15.417	23.4	1567
GeoB9512-4	Tierney and Tingley 2015	0.3142	0.0702	0.0583	0.0124	0.5157	0.0291	-17.485	15.376	23.4	787
GeoB9513-5	Tierney and Tingley 2015	0.3251	0.0702	0.0576	0.014	0.5073	0.0258	-17.294	15.318	23.4	498
GeoB9520-4	Tierney and Tingley 2015	0.3135	0.0754	0.0637	0.011	0.5069	0.0294	-17.591	13.829	24.2	1102
GeoB9521-3	Tierney and Tingley 2015	0.3131	0.0684	0.0579	0.0144	0.5216	0.0246	-17.49	13.849	24.2	522
GeoB9525-5	Tierney and Tingley 2015	0.3329	0.0805	0.0738	0.0111	0.4726	0.0291	-17.88	12.64	24.8	2648
GeoB9526-4	Tierney and Tingley 2015	0.3381	0.0776	0.0738	0.0099	0.4704	0.0302	-18.056	12.435	25.3	3223
GeoB9528-1	Tierney and Tingley 2015	0.3225	0.0798	0.0785	0.0074	0.4752	0.0366	-17.664	9.166	27	3053
GeoB9529-1	Tierney and Tingley 2015	0.3296	0.0797	0.0796	0.0085	0.4682	0.0344	-17.369	8.352	27.4	1234
GeoB9534-4	Tierney and Tingley 2015	0.2958	0.0721	0.072	0.0135	0.5176	0.0289	-14.936	8.901	27.3	493
GeoB9535-5	Tierney and Tingley 2015	0.3009	0.0741	0.0743	0.0124	0.5081	0.0302	-14.961	8.876	27.3	666
Gullmarsfjord	Tierney and Tingley 2015	0.4317	0.0237	0.0086	0.0037	0.5291	0.0032	11.5	58.333	9.1	110
HB-4	Tierney and Tingley 2015	0.5356	0.0273	0.0113	0.0038	0.4192	0.0028	-87.712	60.621	6.3	205
HB-5	Tierney and Tingley 2015	0.4967	0.0204	0.0049	0.0025	0.4724	0.003	-90.712	60.621	5.3	128
HB-6	Tierney and Tingley 2015	0.5002	0.0145	0.0045	0.0026	0.4763	0.0019	-91.712	60.621	6.8	120
HON02-015 BEN	Tierney and Tingley 2015	0.4966	0.0389	0.0141	0.0031	0.4427	0.0046	-63.712	49.621	5.5	395
HQ08-48PC	Tierney and Tingley 2015	0.2286	0.0575	0.0696	0.01	0.592	0.0424	110.53	16.96	27	1474
IK9307-3	Tierney and Tingley 2015	0.411	0.0211	0.0129	0.0074	0.5408	0.0067	131.297	72.55	3	21
IK9316-6	Tierney and Tingley 2015	0.4342	0.0204	0.0108	0.0066	0.5223	0.0058	131.502	73.0017	2.1	28
IK9318-5	Tierney and Tingley 2015	0.4585	0.0279	0.0099	0.0061	0.4928	0.0049	137.552	73.4967	0.9	24
IK9327-6	Tierney and Tingley 2015	0.4927	0.0209	0.0064	0.0047	0.4715	0.0038	119.86	73.9983	2.2	30
IK9330-5	Tierney and Tingley 2015	0.485	0.0217	0.0062	0.0045	0.4782	0.0043	127.503	74	3.3	27
IK9338-5	Tierney and Tingley 2015	0.5038	0.021	0.005	0.0045	0.4619	0.0038	119.955	74.4917	1.9	34
IK9340-GKG	Tierney and Tingley 2015	0.5333	0.0235	0.0113	0.0054	0.4217	0.0049	122.993	74.5	2.8	16
IK9342-6	Tierney and Tingley 2015	0.5001	0.0218	0.0057	0.0042	0.4641	0.0041	127.348	74.51	3.3	34
IK9350-6	Tierney and Tingley 2015	0.4486	0.0225	0.0088	0.0053	0.5105	0.0044	136.03	75.01	1.2	31
IK9356-2	Tierney and Tingley 2015	0.4491	0.018	0.0052	0.0044	0.5183	0.0049	123.015	74.9967	3.2	33
IK9367-2	Tierney and Tingley 2015	0.4537	0.0191	0.0055	0.0045	0.5133	0.0038	123.842	75.4817	3.2	44
IK9373A-6	Tierney and Tingley 2015	0.4853	0.0203	0.0072	0.0043	0.4789	0.004	134.583	75.81	0.1	46
IK93Z2-8	Tierney and Tingley 2015	0.4966	0.0462	0.0365	0.019	0.391	0.0107	113.997	73.6667	2.6	9
IK93Z3-2	Tierney and Tingley 2015	0.4731	0.0348	0.0166	0.012	0.4559	0.0076	119.828	73.2917	2.2	12
IK93Z4-4	Tierney and Tingley 2015	0.4658	0.0428	0.0191	0.0154	0.449	0.0079	130.127	72.0333	2.9	14
IK93Z5-3	Tierney and Tingley 2015	0.5291	0.0357	0.0167	0.0102	0.4019	0.0063	137.007	71.69	2.4	11
IS-S1	Tierney and Tingley 2015	0.3757	0.0686	0.0575	0.0089	0.4677	0.0216	-9.852	48.062	13.4	2006
IS-S2	Tierney and Tingley 2015	0.3909	0.0662	0.0486	0.0098	0.4662	0.0184	-9.707	48.178	13.4	1035
IS-S3	Tierney and Tingley 2015	0.4116	0.0678	0.0427	0.0106	0.4525	0.0147	-9.709	48.267	13.4	497
IS-S4	Tierney and Tingley 2015	0.4635	0.0373	0.0127	0.0049	0.4779	0.0037	-6.099	51.218	11.9	106
IS-S5	Tierney and Tingley 2015	0.4588	0.0345	0.0103	0.0038	0.4891	0.0036	-5.593	53.883	10.8	104
IS-S6	Tierney and Tingley 2015	0.4886	0.0279	0.0087	0.0037	0.4686	0.0025	-5.584	54.119	10.8	54
KH01-3 St. 01	Tierney and Tingley 2015	0.384	0.059	0.047	0.004	0.494	0.013	-160	0	27.6	5142
KH01-3 St. 08	Tierney and Tingley 2015	0.388	0.056	0.043	0.003	0.494	0.015	-160	-35	17.6	5098
KH01-3 St. 10	Tierney and Tingley 2015	0.251	0.051	0.063	0.006	0.586	0.042	-160	-47	11.1	5118
KH01-3 St. 17	Tierney and Tingley 2015	0.365	0.058	0.051	0.003	0.498	0.024	140	-60	0.9	4483
KH01-3 St. 19	Tierney and Tingley 2015	0.34	0.063	0.059	0.007	0.506	0.026	140	-50	7.7	3755
KH03-1 HY03	Tierney and Tingley 2015	0.345	0.067	0.063	0.006	0.49	0.031	-94.95	8.0333	27.7	3661
KH03-1 HY04	Tierney and Tingley 2015	0.34	0.062	0.061	0.005	0.503	0.029	-95.05	4.0333	27.5	3563
KH03-1 HY05	Tierney and Tingley 2015	0.224	0.06	0.066	0.007	0.598	0.045	-95.5	2.0167	26.3	2886
KH03-1 HY06	Tierney and Tingley 2015	0.342	0.066	0.059	0.006	0.499	0.029	-95.4333	0.0167	23.8	3246
KH03-1 HY07	Tierney and Tingley 2015	0.359	0.068	0.062	0.004	0.48	0.026	-95	-2.0333	23	3331
KH03-1 HY08	Tierney and Tingley 2015	0.369	0.062	0.055	0.006	0.482	0.027	-95	-3.9667	24.2	3657
KH03-1 HY08B	Tierney and Tingley 2015	0.344	0.071	0.069	0.004	0.481	0.032	-94.9167	-5.95	24.4	3852
KH03-1 HY09	Tierney and Tingley 2015	0.23	0.045	0.067	0.007	0.603	0.047	-95.0167	-7.9833	24.3	3910
KH04-5 SX02	Tierney and Tingley 2015	0.548	0.041	0.012	0.002	0.392	0.005	157.517	-0.6667	29.3	2098
KH04-5 SX09	Tierney and Tingley 2015	0.543	0.031	0.009	0.002	0.41	0.005	174.2	-65.15	-0.2	3393
KH04-5 SX10	Tierney and Tingley 2015	0.54	0.042	0.014	0.002	0.396	0.007	-172.65	-67.2167	0.2	3884
KH04-5 SX14	Tierney and Tingley 2015	0.432	0.046	0.025	0.003	0.484	0.011	-170	-50.0167	9.8	5388
KH04-5 SX15	Tierney and Tingley 2015	0.452	0.049	0.025	0.002	0.462	0.009	-170	-45	12.6	5165
KH04-5 SX16	Tierney and Tingley 2015	0.426	0.053	0.028	0.003	0.479	0.011	-171	-43.1833	14.1	2313
KH04-5 SX17	Tierney and Tingley 2015	0.419	0.055	0.033	0.003	0.479	0.011	-170	-40	15.5	4635
LMG0404-16	Tierney and Tingley 2015	0.4703	0.012	0.004	0.0027	0.5084	0.0026	11.383	79.012	1.9	380
LMG0404-3	Tierney and Tingley 2015	0.4576	0.0125	0.0041	0.0029	0.5203	0.0026	-55.313	-63.136	-1.1	758
LMG0502-25	Tierney and Tingley 2015	0.5037	0.0126	0.0036	0.0022	0.4754	0.0025	-60.383	-64.797	-1.3	861
LMG9802-6	Tierney and Tingley 2015	0.5221	0.0248	0.0067	0.0019	0.4411	0.0034	-66.884	-67.216	-0.8	650
M2003-01	Tierney and Tingley 2015	0.5262	0.0368	0.013	0.0039	0.4145	0.0056	-1.966	62.001	8.6	1602
M2003-06	Tierney and Tingley 2015	0.5312	0.0328	0.0107	0.0035	0.4165	0.0052	29.553	74.146	3.8	366
M2003-08	Tierney and Tingley 2015	0.5303	0.0337	0.0109	0.0036	0.4167	0.0048	-1.125	62.767	8.6	1601
MC-1	Tierney and Tingley 2015	0.4821	0.0394	0.0176	0.0041	0.4511	0.0056	141.546	41.3	12.1	1002
MC-3	Tierney and Tingley 2015	0.5328	0.0367	0.0108	0.0039	0.4104	0.0053	138.597	41.251	12.8	1268
MC3K	Tierney and Tingley 2015	0.2393	0.0721	0.0885	0.0128	0.5367	0.0506	-90.3	27.5	25.4	1100
MC4R	Tierney and Tingley 2015	0.2369	0.0699	0.0854	0.012	0.5491	0.0468	-90.3	27.5	25.4	1100
MC4S	Tierney and Tingley 2015	0.2264	0.0747	0.0959	0.0125	0.537	0.0534	-90.3	27.5	25.4	1100
MC-6	Tierney and Tingley 2015	0.5283	0.0365	0.0133	0.0051	0.4123	0.0045	139.211	39.32	15.5	856
MD03-2601	Tierney and Tingley 2015	0.5824	0.0179	0.006	0.0034	0.3882	0.0021	138.557	-66.051	-0.4	750
MD03-2603	Tierney and Tingley 2015	0.5319	0.0361	0.0116	0.0027	0.411	0.0068	139.375	-64.285	-0.2	3331
MD03-2604	Tierney and Tingley 2015	0.565	0.0373	0.0123	0.0025	0.376	0.0068	139.375	-64.285	-0.2	3331
MD05-2894	Tierney and Tingley 2015	0.1637	0.0535	0.0787	0.0142	0.6414	0.0485	111.55	7.04	28.2	1982
MD05-2896	Tierney and Tingley 2015	0.2178	0.0587	0.0804	0.0098	0.5938	0.0395	111.441	8.825	28.5	1657
MD05-2898	Tierney and Tingley 2015	0.2218	0.0617	0.0802	0.0115	0.5795	0.0453	112.18	13.79	27.7	2395
MD05-2900	Tierney and Tingley 2015	0.2101	0.0603	0.0768	0.0116	0.5949	0.0464	110.7	14.39	27.1	1455
MD05-2902	Tierney and Tingley 2015	0.1999	0.0616	0.0812	0.0109	0.5964	0.0501	114.96	17.96	27.3	3697
MD05-2903	Tierney and Tingley 2015	0.217	0.0631	0.0781	0.0121	0.5811	0.0487	116.25	19.46	26.6	2066
MD05-2905	Tierney and Tingley 2015	0.2086	0.0621	0.0772	0.0124	0.5913	0.0484	117.36	20.14	26.4	1647
Mokbaai	Tierney and Tingley 2015	0.5122	0.0476	0.0209	0.0099	0.4059	0.0036	4.083	53	10.6	5
MW91-9 BC-22	Tierney and Tingley 2015	0.226	0.0658	0.0848	0.013	0.5469	0.0635	160.4	0	29.5	2965
MW91-9 BC-37	Tierney and Tingley 2015	0.2251	0.066	0.0816	0.0125	0.5547	0.06	157.8	-0.98	29.3	2022
MW91-9 BC-51	Tierney and Tingley 2015	0.2314	0.0633	0.082	0.0125	0.5509	0.06	161	0	29.5	3397
MW91-9 BC-58	Tierney and Tingley 2015	0.2393	0.0656	0.0806	0.0119	0.5432	0.0593	162.2	0	29.5	4329
MW91-9 BC-74	Tierney and Tingley 2015	0.2276	0.0662	0.0809	0.0116	0.5541	0.0596	162.6	0	29.5	4445
MW91-9 GGC-12	Tierney and Tingley 2015	0.2398	0.0678	0.084	0.0125	0.5334	0.0626	157.9	-1	29.3	2018
MW91-9 GGC-15	Tierney and Tingley 2015	0.2441	0.0681	0.0826	0.0128	0.5326	0.0598	158.9	0	29.3	2311
MW91-9 GGC-18	Tierney and Tingley 2015	0.2341	0.0653	0.0844	0.013	0.5413	0.0619	160.5	0	29.5	2980
MW91-9 GGC-29	Tierney and Tingley 2015	0.2248	0.0656	0.0802	0.012	0.5547	0.0627	158.9	0	29.3	2322
MW91-9 GGC-38	Tierney and Tingley 2015	0.2802	0.0634	0.0791	0.0123	0.5097	0.0553	159.4	0	29.4	2456
MW91-9 GGC-44	Tierney and Tingley 2015	0.2411	0.0633	0.0804	0.0121	0.5427	0.0604	160.6	0	29.5	3160
MW91-9 GGC-55	Tierney and Tingley 2015	0.2348	0.0652	0.077	0.0117	0.5485	0.0627	161.8	0	29.6	4025
MW91-9 GGC-6	Tierney and Tingley 2015	0.2508	0.0671	0.0871	0.0117	0.5258	0.0576	156.99	-2.3	29.3	1618
MW91-9 GGC-68	Tierney and Tingley 2015	0.2557	0.0638	0.076	0.0115	0.5319	0.0611	162.7	0	29.5	4449
MW91-9 GGC-8	Tierney and Tingley 2015	0.2441	0.0678	0.0861	0.0125	0.533	0.0564	156.9	-2.2	29.3	1625
NBP0003-1	Tierney and Tingley 2015	0.5002	0.0137	0.0038	0.002	0.4774	0.0028	-58.578	-64.294	-1.3	768
NBP0003-28	Tierney and Tingley 2015	0.4931	0.0146	0.0044	0.0021	0.4821	0.0037	-58.516	-64.367	-1.3	794
NBP0003-29	Tierney and Tingley 2015	0.502	0.0131	0.0037	0.002	0.4784	0.0008	-58.444	-64.356	-1.3	690
NBP0003-30	Tierney and Tingley 2015	0.5082	0.0122	0.0034	0.002	0.4719	0.0023	-58.45	-64.281	-1.3	843
NBP0107 JPC33	Tierney and Tingley 2015	0.541	0.0234	0.0068	0.0024	0.4237	0.0027	-61.491	-63.135	0	704
NBP0107-17	Tierney and Tingley 2015	0.4461	0.0237	0.0067	0.0023	0.5167	0.0045	-65.401	-64.849	-0.2	657
NBP0107-28	Tierney and Tingley 2015	0.5435	0.017	0.0047	0.0021	0.4302	0.0025	-62.046	-64.317	0.4	1014
NBP0107-49	Tierney and Tingley 2015	0.4704	0.0121	0.0041	0.0026	0.5081	0.0027	-56.382	-63.667	-1.3	638
NBP0603-3	Tierney and Tingley 2015	0.5173	0.0162	0.0042	0.0017	0.4579	0.0028	-61.565	-65.768	-1.3	772
NBP0702-10	Tierney and Tingley 2015	0.5208	0.015	0.004	0.0018	0.4555	0.0029	-108.61	-74.1	-1.7	730
NBP0702-13	Tierney and Tingley 2015	0.5152	0.0206	0.0057	0.003	0.4527	0.0029	-134.52	-73.94	-1.8	470
NBP0702-15	Tierney and Tingley 2015	0.5056	0.0232	0.0064	0.0027	0.459	0.0032	-125.81	-72.56	-1.6	425
NBP0702-17	Tierney and Tingley 2015	0.531	0.0204	0.0056	0.0021	0.4378	0.0031	-114.99	-71.54	-1.8	424
NBP0702-20	Tierney and Tingley 2015	0.5164	0.0328	0.0097	0.0027	0.4341	0.0043	-106.01	-71.13	-1.8	512
NBP0702-22	Tierney and Tingley 2015	0.4778	0.0345	0.0113	0.003	0.4683	0.005	-104.01	-71.75	-1.8	665
NBP0702-3	Tierney and Tingley 2015	0.5414	0.0219	0.0068	0.0024	0.4248	0.0026	-158.27	-77.47	-0.9	1081
NBP9507-2	Tierney and Tingley 2015	0.4367	0.013	0.0038	0.0017	0.542	0.0027	-57.494	-62.208	-0.5	300
NBP9903-20	Tierney and Tingley 2015	0.4943	0.0148	0.0047	0.0024	0.4811	0.0028	-62.916	-64.844	-0.2	301
NBP9903-21	Tierney and Tingley 2015	0.5227	0.0161	0.005	0.0025	0.4512	0.0025	-62.976	-64.844	-0.2	282
NIOP 325	Tierney and Tingley 2015	0.2791	0.0729	0.0924	0.0108	0.4953	0.0495	53.55	10.683	26.6	4065
NIOP 902	Tierney and Tingley 2015	0.2249	0.062	0.0614	0.0165	0.5924	0.0428	51.577	10.779	26.1	459
NIOP 903	Tierney and Tingley 2015	0.2229	0.0675	0.0794	0.0166	0.5636	0.0501	51.658	10.783	26.1	789
NIOP 904	Tierney and Tingley 2015	0.2319	0.0693	0.0761	0.0138	0.5611	0.0477	51.771	10.788	26.1	1194
NIOP 905	Tierney and Tingley 2015	0.2466	0.0682	0.0852	0.0155	0.5313	0.0531	51.944	10.916	26.1	1567
NIOP 906	Tierney and Tingley 2015	0.2443	0.0636	0.077	0.012	0.5429	0.0601	52.129	10.812	26.1	2020
NIOP 907	Tierney and Tingley 2015	0.2607	0.0649	0.0798	0.0128	0.5285	0.0533	52.249	10.804	26.1	2807
NIOP 908	Tierney and Tingley 2015	0.2863	0.0715	0.0842	0.0127	0.4941	0.0513	52.915	10.778	26.1	3572
NIOP 915	Tierney and Tingley 2015	0.2824	0.0717	0.0879	0.0121	0.4919	0.0541	53.524	10.69	26.6	4035
NIOP 922	Tierney and Tingley 2015	0.1955	0.0599	0.072	0.0139	0.5988	0.0599	52.53	16.17	26.6	201
North Frisian Front	Tierney and Tingley 2015	0.5059	0.0345	0.0131	0.0048	0.4381	0.0036	4.5	54	10.6	42
North Sea Breeveertien 14	Tierney and Tingley 2015	0.4563	0.0532	0.0188	0.0071	0.4605	0.0041	3.733	52.908	11.3	-999
North Sea Central Southern Bight	Tierney and Tingley 2015	0.4572	0.0445	0.0196	0.0071	0.4676	0.0041	3	53	10.3	40
North Sea Dutch Coast	Tierney and Tingley 2015	0.4792	0.0495	0.0167	0.0057	0.4436	0.0051	4.5	53	11	24
NP-07-13-08	Tierney and Tingley 2015	0.4896	0.014	0.0048	0.0031	0.486	0.0025	10.749	79.029	1.9	328
NP-07-13-09	Tierney and Tingley 2015	0.4771	0.0132	0.0049	0.0031	0.4989	0.0028	10.666	79.059	1.9	326
NP-07-13-10	Tierney and Tingley 2015	0.4563	0.0117	0.0043	0.0031	0.5225	0.002	10.847	79.065	1.9	325
NP-07-13-11	Tierney and Tingley 2015	0.5652	0.0147	0.0048	0.0029	0.4109	0.0016	11.661	79.118	1.9	313
NP-07-13-13	Tierney and Tingley 2015	0.5621	0.0175	0.0065	0.004	0.4073	0.0026	11.622	79.295	1.9	205
NP-07-13-14	Tierney and Tingley 2015	0.5789	0.0182	0.0056	0.0031	0.3921	0.0022	11.668	79.266	1.9	245
NP-07-13-15	Tierney and Tingley 2015	0.5814	0.0174	0.0054	0.003	0.3906	0.0022	11.706	79.228	1.9	269
NP-07-13-16	Tierney and Tingley 2015	0.5641	0.0147	0.005	0.0031	0.4107	0.0023	11.761	79.186	1.9	374
NP-07-13-21	Tierney and Tingley 2015	0.5511	0.0152	0.0051	0.0031	0.4231	0.0023	11.924	79.225	1.9	279
NP-07-13-23	Tierney and Tingley 2015	0.4911	0.0133	0.0047	0.0031	0.486	0.0018	11.028	79.015	1.9	336
NP-07-13-24	Tierney and Tingley 2015	0.4687	0.0123	0.0044	0.0031	0.5095	0.002	10.859	79.013	1.9	326
NP-07-13-25	Tierney and Tingley 2015	0.483	0.0134	0.0047	0.0031	0.4936	0.0022	10.87	79.04	1.9	340
NP-07-13-26	Tierney and Tingley 2015	0.4784	0.013	0.0046	0.0032	0.4983	0.0024	11.086	79.051	1.9	334
NP-07-13-30	Tierney and Tingley 2015	0.5182	0.0161	0.0053	0.003	0.455	0.0023	16.714	-29.136	13.7	88
NP-07-13-31	Tierney and Tingley 2015	0.5301	0.0157	0.0051	0.0028	0.4444	0.0019	16.28	80.362	1.1	398
NP-07-13-32	Tierney and Tingley 2015	0.5033	0.015	0.0051	0.0032	0.4711	0.0024	16.955	80.214	1.1	451
NP-07-13-33	Tierney and Tingley 2015	0.5115	0.0149	0.0052	0.0031	0.463	0.0024	17.173	80.099	1.2	416
NP-07-13-34	Tierney and Tingley 2015	0.5132	0.0148	0.0051	0.0032	0.4612	0.0025	17.764	79.949	1.2	400
NP-07-13-35	Tierney and Tingley 2015	0.5524	0.0154	0.005	0.0031	0.4221	0.0021	18.134	79.798	1.2	446
NP-07-13-36	Tierney and Tingley 2015	0.5478	0.0163	0.0055	0.0033	0.425	0.0021	18.859	79.614	1.2	339
NP-07-13-40	Tierney and Tingley 2015	0.5492	0.0151	0.0052	0.0031	0.4256	0.0018	11.952	78.956	1.9	342
NP-07-13-41	Tierney and Tingley 2015	0.5462	0.0146	0.005	0.003	0.4295	0.0018	11.491	79.064	1.9	307
NP-07-13-42	Tierney and Tingley 2015	0.5433	0.0153	0.0049	0.0031	0.4316	0.0018	11.837	78.986	1.9	320
NP-07-13-44	Tierney and Tingley 2015	0.5475	0.015	0.005	0.0031	0.4278	0.0016	11.726	79.012	1.9	285
NP-07-13-46	Tierney and Tingley 2015	0.5304	0.0149	0.0049	0.0031	0.4447	0.0019	11.493	79.029	1.9	267
NP-07-13-47	Tierney and Tingley 2015	0.5327	0.0159	0.0052	0.0031	0.441	0.0022	11.599	79.016	1.9	252
NP-07-13-48	Tierney and Tingley 2015	0.4924	0.0129	0.0045	0.003	0.4852	0.0019	11.505	79	1.9	359
NP-07-13-49	Tierney and Tingley 2015	0.4763	0.0124	0.0045	0.003	0.5017	0.0021	-55.823	-63.071	-0.7	743
NP-07-13-50	Tierney and Tingley 2015	0.4888	0.013	0.0044	0.0029	0.4888	0.0021	11.31	79.032	1.9	330
NP-07-13-51	Tierney and Tingley 2015	0.5015	0.0136	0.0051	0.0032	0.4749	0.0018	11.37	79.044	1.9	335
NP-07-13-52	Tierney and Tingley 2015	0.3788	0.0113	0.004	0.0028	0.6	0.0031	11.377	79.073	1.9	295
NP-07-13-53	Tierney and Tingley 2015	0.5358	0.0152	0.0052	0.0031	0.4387	0.002	11.653	78.986	1.9	286
NP-07-13-55	Tierney and Tingley 2015	0.5767	0.0147	0.0047	0.0027	0.3996	0.0016	11.744	79.149	1.9	340
NP-07-13-60	Tierney and Tingley 2015	0.551	0.0151	0.0051	0.0033	0.424	0.0015	12.062	78.928	1.9	204
NP-07-13-61	Tierney and Tingley 2015	0.5472	0.0171	0.0088	0.0045	0.4198	0.0025	12.405	78.907	1.9	73
NP-07-13-64	Tierney and Tingley 2015	0.5382	0.0145	0.0047	0.0029	0.4376	0.002	11.807	78.965	1.9	299
OCE205	Tierney and Tingley 2015	0.1854	0.0667	0.0771	0.0376	0.6004	0.0328	-77.7	26.2	26.4	-999
OCE437-7 MC11A	Tierney and Tingley 2015	0.307	0.0673	0.0593	0.0132	0.5256	0.0277	-9.0653	36.3901	18.1	596
OCE437-7 MC12C	Tierney and Tingley 2015	0.2896	0.0697	0.0772	0.0115	0.5157	0.0362	-7.5315	35.8903	19.2	1184
OCE437-7 MC15G	Tierney and Tingley 2015	0.296	0.067	0.059	0.0139	0.5362	0.0279	-7.7643	34.115	19.5	388
OCE437-7 MC18C	Tierney and Tingley 2015	0.2766	0.073	0.0808	0.0115	0.5211	0.0369	-9.3165	33.4485	19.5	835
OCE437-7 MC1A	Tierney and Tingley 2015	0.2826	0.0682	0.0747	0.0105	0.5272	0.0367	-9.5128	37.8278	17.3	1123
OCE437-7 MC22C	Tierney and Tingley 2015	0.3345	0.0648	0.0555	0.01	0.5068	0.0283	-10.2829	30.8603	17.6	835
OCE437-7 MC25C	Tierney and Tingley 2015	0.316	0.0654	0.0621	0.0095	0.5159	0.0311	-10.6317	30.8882	17.6	1244
OCE437-7 MC28D	Tierney and Tingley 2015	0.276	0.0711	0.0771	0.0091	0.5272	0.0395	-12.4669	29.0181	19.5	776
OCE437-7 MC31A	Tierney and Tingley 2015	0.3288	0.066	0.0639	0.0095	0.5003	0.0314	-13.7408	27.5371	19.7	1029
OCE437-7 MC36F	Tierney and Tingley 2015	0.2893	0.0723	0.0823	0.0086	0.5076	0.0399	-15.1201	26.8273	20.3	2812
OCE437-7 MC39E	Tierney and Tingley 2015	0.2982	0.0762	0.077	0.0084	0.5024	0.0379	-16.4069	25.4993	20.2	1780
OCE437-7 MC42A	Tierney and Tingley 2015	0.3084	0.0724	0.0697	0.0085	0.5036	0.0374	-16.6571	25.0203	20.2	1401
OCE437-7 MC44B	Tierney and Tingley 2015	0.3149	0.073	0.0723	0.0078	0.4955	0.0366	-17.0478	24.3686	20.8	1662
OCE437-7 MC4E	Tierney and Tingley 2015	0.2778	0.0654	0.076	0.0091	0.5311	0.0407	-10.184	37.8372	17.9	3146
OCE437-7 MC50B	Tierney and Tingley 2015	0.3181	0.0717	0.0687	0.0077	0.4975	0.0363	-17.8542	23.2071	19.3	2295
OCE437-7 MC51B	Tierney and Tingley 2015	0.3278	0.0682	0.0565	0.0084	0.5055	0.0335	-17.8708	21.797	18.4	1276
OCE437-7 MC55B	Tierney and Tingley 2015	0.3331	0.0643	0.0504	0.0094	0.5123	0.0304	-17.8028	21.2393	18.4	798
OCE437-7 MC63E	Tierney and Tingley 2015	0.3426	0.0701	0.0614	0.0093	0.4837	0.0329	-18.5512	20.7463	20.2	2106
OCE437-7 MC65H	Tierney and Tingley 2015	0.3315	0.0699	0.0565	0.0101	0.4994	0.0325	-17.8607	19.9434	20.1	1455
OCE437-7 MC67D	Tierney and Tingley 2015	0.3279	0.0721	0.0593	0.0095	0.4982	0.0329	-17.2767	19.3567	20.1	1393
OCE437-7 MC69A	Tierney and Tingley 2015	0.3401	0.0727	0.0639	0.0097	0.48	0.0336	-17.3348	18.6388	22.2	2282
OCE437-7 MC78F	Tierney and Tingley 2015	0.2814	0.0726	0.0794	0.0103	0.5158	0.0405	-23.4132	15.31	24.2	944
OCE437-7 MC7B	Tierney and Tingley 2015	0.2878	0.063	0.0749	0.0098	0.526	0.0384	-9.8672	36.7722	18.1	2735
OMEX 98-5	Tierney and Tingley 2015	0.3804	0.0671	0.0484	0.0114	0.4737	0.019	9.29	41.38	17.8	765
OMEX 99-15	Tierney and Tingley 2015	0.4117	0.0592	0.0357	0.0102	0.4663	0.0168	9.37	39.35	18.4	-999
Oyster grounds	Tierney and Tingley 2015	0.5028	0.0331	0.0123	0.0049	0.4438	0.0032	4.5	54.5	10.6	47
PD90-7-21	Tierney and Tingley 2015	0.5256	0.0161	0.0057	0.0025	0.4474	0.0026	-62.599	-64.907	-0.2	240
PD90-7-6	Tierney and Tingley 2015	0.5165	0.0192	0.0061	0.0025	0.4524	0.0033	-63.191	-65.121	-0.2	171
PD90-7-8	Tierney and Tingley 2015	0.5426	0.0207	0.0062	0.0024	0.4246	0.0035	-63.22	-65.155	-0.2	493
PD90-7-9	Tierney and Tingley 2015	0.5472	0.0195	0.006	0.0023	0.4226	0.0025	-63.228	-65.166	-0.2	490
Peru Margin PM1	Tierney and Tingley 2015	0.3144	0.0481	0.0326	0.0102	0.5806	0.014	-77.317	-11.983	18.5	100
Peru Margin PM7	Tierney and Tingley 2015	0.2854	0.0516	0.0496	0.0133	0.5812	0.0189	-78.067	-11.05	19.9	250
PLS-91-1-1	Tierney and Tingley 2015	0.496	0.0225	0.0055	0.0026	0.4707	0.0027	29.202	78.308	0.3	303
PLS-91-1-10	Tierney and Tingley 2015	0.494	0.0554	0.0175	0.0029	0.4217	0.0085	32.377	83.706	-1.7	4004
PLS-91-1-12	Tierney and Tingley 2015	0.4962	0.0609	0.0179	0.0027	0.4146	0.0077	33.94	84.185	-1.1	4052
PLS-91-1-14	Tierney and Tingley 2015	0.497	0.0481	0.014	0.0031	0.4307	0.0071	40.599	84.807	-1	4018
PLS-91-1-17	Tierney and Tingley 2015	0.5214	0.0371	0.0121	0.0043	0.4194	0.0057	140.498	-65.468	-1.2	1567
PLS-91-1-20	Tierney and Tingley 2015	0.503	0.0342	0.0099	0.003	0.4446	0.0052	48.229	83.017	-1.7	2900
PLS-91-1-21	Tierney and Tingley 2015	0.49	0.0383	0.0152	0.0038	0.4473	0.0053	47.889	82.662	-0.8	1345
PLS-91-1-23	Tierney and Tingley 2015	0.5049	0.0218	0.0058	0.006	0.4578	0.0037	43.432	81.118	-1.3	466
PLS-91-1-24	Tierney and Tingley 2015	0.5506	0.0245	0.0062	0.0059	0.4103	0.0025	42.874	81.021	-0.8	472
PLS-91-1-31	Tierney and Tingley 2015	0.5336	0.0275	0.0078	0.0035	0.4238	0.0038	21.273	73.724	5.3	1536
PLS-91-1-5	Tierney and Tingley 2015	0.5053	0.0248	0.0066	0.0035	0.4559	0.0039	29.021	80.867	-0.8	4018
PLS-91-1-6	Tierney and Tingley 2015	0.5111	0.0208	0.0052	0.0025	0.4566	0.0038	28.534	81.487	0	628
PS2334-1	Tierney and Tingley 2015	0.541	0.0527	0.0221	0.0033	0.371	0.0099	-52	-57.9175	2.3	4557
PS2336-1	Tierney and Tingley 2015	0.5614	0.0533	0.0226	0	0.3539	0.0089	-53.9885	-57.1518	2.7	4006
PS2339-1	Tierney and Tingley 2015	0.5265	0.0611	0.0232	0.0046	0.372	0.0126	-56.9433	-56.0308	4	4542
PS2342-1	Tierney and Tingley 2015	0.4988	0.0659	0.0259	0.0047	0.3917	0.0131	-57.9843	-55.2582	5.1	4372
PS2453-2	Tierney and Tingley 2015	0.4952	0.0242	0.0255	0.0067	0.4423	0.0061	133.355	76.5083	2	38
PS2455-3	Tierney and Tingley 2015	0.4942	0.0415	0.0128	0.0063	0.4388	0.0063	130.535	79.6517	-1.7	3429
PS2458-4	Tierney and Tingley 2015	0.4911	0.0238	0.0136	0.0046	0.4626	0.0044	133.398	78.1667	-1.3	983
PS2461-2	Tierney and Tingley 2015	0.4878	0.0214	0.0152	0.0047	0.4671	0.0036	133.555	77.91	-0.4	73
PS2462-3	Tierney and Tingley 2015	0.4756	0.022	0.0179	0.0058	0.4735	0.0052	133.557	77.405	-0.4	54
PS2470-1	Tierney and Tingley 2015	0.4903	0.0409	0.0164	0.0056	0.4401	0.0067	122.855	79.2267	-1.8	3237
PS2472-3	Tierney and Tingley 2015	0.4891	0.0306	0.0118	0.0043	0.4591	0.0051	118.738	78.6667	-1.8	2620
PS2473-3	Tierney and Tingley 2015	0.5031	0.0272	0.016	0.0044	0.4444	0.0048	118.572	77.9817	-1.8	1927
PS2474-2	Tierney and Tingley 2015	0.4938	0.0266	0.0137	0.004	0.4569	0.005	118.575	77.67	-1.8	1497
PS2478-3	Tierney and Tingley 2015	0.5034	0.02	0.0119	0.004	0.4566	0.004	118.71	77.1717	-1.8	101
PS2489-2	Tierney and Tingley 2015	0.4497	0.068	0.044	0.0037	0.4187	0.0159	8.9733	-42.8733	10.1	3794
PS2579-1	Tierney and Tingley 2015	0.6066	0.0459	0.0149	0.0025	0.3221	0.0079	7.7717	-62.9583	-0.4	5305
PS2589-2	Tierney and Tingley 2015	0.5795	0.0552	0.0178	0.0029	0.3372	0.0075	24.9767	-66.0017	-1.5	4641
PS2659-2	Tierney and Tingley 2015	0.5006	0.0674	0.0389	0.0016	0.3815	0.0101	-85.688	-50.749	6.8	4579
PS2663-4	Tierney and Tingley 2015	0.5546	0.0547	0.0277	0.0022	0.3541	0.0067	-89.547	-53.287	7.4	4972
PS2687-5	Tierney and Tingley 2015	0.5462	0.0565	0.0321	0.0024	0.3518	0.0109	-92.556	-68.074	-0.5	4454
PS2691-1	Tierney and Tingley 2015	0.5339	0.0659	0.0216	0.0011	0.3713	0.0061	-91.171	-65.395	1	4715
PS2697-1	Tierney and Tingley 2015	0.4546	0.0795	0.0335	0.0038	0.418	0.0106	-89.493	-62.997	2.6	4783
PS2715-3	Tierney and Tingley 2015	0.5447	0.0662	0.0277	0.0017	0.3526	0.007	-88.008	-57.041	6.2	5190
PS2728-2	Tierney and Tingley 2015	0.5028	0.0233	0.0324	0.0067	0.4295	0.0053	135.008	77.25	-1.5	44
PS2747-8	Tierney and Tingley 2015	0.5256	0.0292	0.0132	0.0045	0.4223	0.0052	133.715	78.5133	-1.3	1995
PS2749-3	Tierney and Tingley 2015	0.5121	0.0331	0.0121	0.0043	0.4329	0.0056	135.113	79.1266	-1.6	2783
PS63/130-2	Tierney and Tingley 2015	0.5794	0.0538	0.0193	0.0023	0.3387	0.0064	23.0009	-61.4995	0.8	5220
PS63/139-2	Tierney and Tingley 2015	0.577	0.057	0.0188	0.0036	0.3356	0.008	23.0008	-58.2994	0.5	5413
PS63/143-2	Tierney and Tingley 2015	0.5816	0.0496	0.0156	0.0029	0.3428	0.0074	23.0141	-56.5071	1.6	4872
PS68/206-2	Tierney and Tingley 2015	0.5585	0.0169	0.006	0.0042	0.3825	0.032	18.5339	77.4587	1.8	105
PS68/211-2	Tierney and Tingley 2015	0.5603	0.0169	0.0058	0.0027	0.3815	0.0328	18.838	77.1491	1.8	124
PS68/242-2	Tierney and Tingley 2015	0.5425	0.0598	0.0221	0.0054	0.348	0.0221	2.8424	79.1336	0.6	5571
PS68/250-2	Tierney and Tingley 2015	0.581	0.0323	0.01	0.0026	0.3443	0.0299	5.1719	79.6038	2.7	2784
PS68/251-2	Tierney and Tingley 2015	0.5818	0.0341	0.0107	0.0034	0.3468	0.0232	4.3276	79.2829	1.9	2401
PS68/271-2	Tierney and Tingley 2015	0.5675	0.0315	0.0098	0.0034	0.3642	0.0236	4.6004	79.1081	1.9	1914
PS68/314-1	Tierney and Tingley 2015	0.5649	0.0353	0.0111	0.003	0.3504	0.0353	8.6337	81.0972	-1.7	1078
PS68/328-2	Tierney and Tingley 2015	0.5805	0.0273	0.0091	0.0029	0.3557	0.0245	5.8851	80.4783	0.1	604
PS68/331-2	Tierney and Tingley 2015	0.5846	0.0301	0.0087	0.0036	0.3401	0.0329	3.7054	80.1563	1.3	1613
PS68/338-3	Tierney and Tingley 2015	0.5744	0.0381	0.0147	0.0033	0.3457	0.0239	-3.9842	78.8321	-1.1	1934
PS68/341-2	Tierney and Tingley 2015	0.6003	0.0331	0.0113	0.0037	0.331	0.0207	-4.9754	78.8124	-1.3	1029
PS68/343-2	Tierney and Tingley 2015	0.612	0.0301	0.0102	0.004	0.3116	0.0322	-5.663	78.8302	-1.1	436
PS68/352-2	Tierney and Tingley 2015	0.6201	0.0226	0.0063	0.0022	0.331	0.0178	-10.0561	78.8344	-0.5	311
PS68/357-2	Tierney and Tingley 2015	0.5652	0.0214	0.0061	0.0034	0.375	0.0289	-12.515	78.829	-0.7	195
PS68/371-2	Tierney and Tingley 2015	0.5504	0.0386	0.0135	0.0038	0.3704	0.0233	14.6632	71.9604	6.9	1352
PS69/793-1	Tierney and Tingley 2015	0.4931	0.0159	0.0041	0.0024	0.4829	0.0016	72.8878	-68.0113	-0.5	703
PS69/853-2	Tierney and Tingley 2015	0.4912	0.0307	0.0079	0	0.4702	0	69.2178	-65.998	0.2	2365
PS69/878-4	Tierney and Tingley 2015	0.5653	0.0358	0.0109	0.0023	0.3858	0	82.6562	-65.3425	-1	3093
PS69/885-1	Tierney and Tingley 2015	0.5226	0.0407	0.0128	0.0027	0.4175	0.0037	82.8733	-63.8372	0.6	3702
PS69/891-3	Tierney and Tingley 2015	0.5127	0.0618	0.0215	0.0033	0.3955	0.0053	82.836	-62.6557	0.7	2295
PS69/899-1	Tierney and Tingley 2015	0.5191	0.0537	0.0177	0.003	0.4002	0.0064	85.6737	-59.6217	1.7	4126
PS69/907-3	Tierney and Tingley 2015	0.4523	0.0672	0.0281	0.0026	0.4421	0.0078	73.3332	-55.0048	2.1	2251
PS69/912-5	Tierney and Tingley 2015	0.5263	0.0342	0.0109	0.0037	0.4215	0.0034	71.5652	-50.3107	2.7	565
PS70/277-2	Tierney and Tingley 2015	0.5288	0.0255	0.0105	0.0037	0.4163	0.0154	83.8702	82.4096	-1.7	1564
PS70/309-8	Tierney and Tingley 2015	0.5246	0.0443	0.0155	0.0054	0.3868	0.0234	104.659	87.0696	-1.5	4443
PS70/319-2	Tierney and Tingley 2015	0.5409	0.0465	0.0142	0.0022	0.3658	0.0303	153.734	88.6752	-1.6	2746
PS70/333-4	Tierney and Tingley 2015	0.5446	0.062	0.0172	0.0018	0.345	0.0294	-146	87	-1.6	3368
PS70/358-3	Tierney and Tingley 2015	0.5656	0.0531	0.0234	0.0011	0.3304	0.0264	152.1	86.5256	-1.7	1467
PS75/034-1	Tierney and Tingley 2015	0.486	0.0703	0.0353	0.0032	0.3995	0.0056	-80.0897	-54.3685	7	4450
PS75/051-2	Tierney and Tingley 2015	0.4717	0.0627	0.0338	0.0033	0.4134	0.0151	-107.805	-52.8123	6.8	3977
PS75/053-1	Tierney and Tingley 2015	0.5165	0.0692	0.0309	0.0038	0.3682	0.0115	-115.98	-60.7692	2.6	5132
PS75/062-1	Tierney and Tingley 2015	0.5482	0.0736	0.0295	0.0028	0.3362	0.0096	-135.626	-58.277	1.5	4147
PS75/063-2	Tierney and Tingley 2015	0.548	0.0604	0.0248	0.0028	0.3503	0.0137	-135.621	-58.9042	1.5	3790
PS75/065-2	Tierney and Tingley 2015	0.5851	0.0656	0.0175	0.0023	0.322	0.0075	-141.515	-62.6039	0.7	4488
PS75/068-1	Tierney and Tingley 2015	0.5682	0.0462	0.0178	0.0019	0.3573	0.0086	-144.115	-64.9334	-1.5	3727
PS75/069-2	Tierney and Tingley 2015	0.5807	0.0632	0.0193	0.0023	0.3232	0.0114	-145.619	-62.2055	-0.2	4328
PS75/070-1	Tierney and Tingley 2015	0.5516	0.0614	0.0226	0.0028	0.3524	0.0092	-150.066	-58.5814	0.2	2839
PS75/072-3	Tierney and Tingley 2015	0.563	0.0672	0.026	0.0035	0.3307	0.0097	-151.219	-57.5599	1	3096
PS75/074-1	Tierney and Tingley 2015	0.5296	0.0703	0.0301	0.0027	0.3522	0.0152	-152.655	-56.2445	2.1	3318
PS75/076-1	Tierney and Tingley 2015	0.4954	0.0719	0.0347	0.0029	0.3845	0.0105	-156.141	-55.5285	4.7	3745
PS75/080-2	Tierney and Tingley 2015	0.5449	0.0641	0.0272	0.0027	0.3531	0.008	-157.637	-58.1774	2	3870
PS75/082-2	Tierney and Tingley 2015	0.5387	0.0712	0.03	0.0033	0.3479	0.0088	-158.364	-59.0417	3.1	4004
PS75/084-1	Tierney and Tingley 2015	0.5464	0.0592	0.0268	0.0034	0.357	0.0072	-159.587	-61.0498	0.6	3313
PS75/085-2	Tierney and Tingley 2015	0.5371	0.0638	0.0264	0.0029	0.3599	0.0099	-160.119	-61.9394	0.6	3724
PS75/086-1	Tierney and Tingley 2015	0.5915	0.0545	0.0194	0.0023	0.3258	0.0064	-161.904	-64.744	-1.1	4064
PS75/087-2	Tierney and Tingley 2015	0.5809	0.0484	0.0175	0.0026	0.3421	0.0085	-163.325	-66.7879	-0.5	4411
PS75/088-3	Tierney and Tingley 2015	0.5497	0.0502	0.019	0.0028	0.3677	0.0106	-164.801	-68.7303	-0.2	3849
PS75/089-6	Tierney and Tingley 2015	0.5576	0.0562	0.018	0.0027	0.3541	0.0114	-165.542	-67.083	0	4121
PS75/090-6	Tierney and Tingley 2015	0.5626	0.0578	0.0204	0.0025	0.3483	0.0085	-166.155	-65.411	0.2	3480
PS75/091-6	Tierney and Tingley 2015	0.5707	0.0684	0.0246	0.003	0.323	0.0103	-169.075	-63.6938	0.7	2944
PS75/092-1	Tierney and Tingley 2015	0.5065	0.0798	0.0342	0.0028	0.3633	0.0133	-169.502	-60.6673	1.7	3833
PS75/094-3	Tierney and Tingley 2015	0.5406	0.0653	0.0271	0.0026	0.3547	0.0096	-169.741	-61.8224	1.2	3274
PS75/095-6	Tierney and Tingley 2015	0.516	0.0699	0.0316	0.0039	0.3681	0.0105	-174.431	-57.0196	4.5	4857
PS75/097-5	Tierney and Tingley 2015	0.5314	0.0673	0.0341	0.0027	0.3528	0.0116	-171.357	-59.7004	4	4675
PS75/098-6	Tierney and Tingley 2015	0.5074	0.0677	0.0349	0.0037	0.3712	0.0153	-179.01	-52.9663	8.3	5187
PS75/099-1	Tierney and Tingley 2015	0.5105	0.0639	0.0346	0.0045	0.3719	0.0147	177.273	-48.2618	8.9	1270
PS75/100-1	Tierney and Tingley 2015	0.4991	0.0653	0.0364	0.0035	0.383	0.0127	177.149	-45.7576	12	2502
PS75/101-2	Tierney and Tingley 2015	0.5046	0.0692	0.0316	0.0044	0.3769	0.0133	175.876	-45.8062	10.9	1773
PS75/104-2	Tierney and Tingley 2015	0.5052	0.0582	0.029	0.0071	0.3917	0.0088	174.526	-44.7693	11.4	835
PS75/105-1	Tierney and Tingley 2015	0.5133	0.0502	0.0231	0.0066	0.3953	0.0115	174.625	-44.4086	11.4	669
RS01-MC359	Tierney and Tingley 2015	0.1013	0.0459	0.0906	0.0226	0.6541	0.0855	34.597	27.687	25.3	1018
RS08-MC601	Tierney and Tingley 2015	0.1705	0.0584	0.0995	0.02	0.5709	0.0807	35.047	27.712	25.3	863
RS09-MC596	Tierney and Tingley 2015	0.0989	0.047	0.0962	0.0222	0.654	0.0816	35.405	27.053	25.7	628
RS13-MC360	Tierney and Tingley 2015	0.1231	0.0545	0.1113	0.0241	0.5947	0.0924	35.36	26.292	25.7	1175
RS15-MC362	Tierney and Tingley 2015	0.1112	0.0477	0.0924	0.0213	0.6395	0.0878	35.085	25.75	25.9	666
RS17-MC363	Tierney and Tingley 2015	0.1137	0.0497	0.1137	0.022	0.6022	0.0988	35.608	25.522	25.9	941
RS19-MC364	Tierney and Tingley 2015	0.1061	0.0458	0.1216	0.021	0.6056	0.0999	36.23	24.76	26.6	1185
RS23-MC365	Tierney and Tingley 2015	0.0828	0.0393	0.1143	0.0215	0.6269	0.1152	36.712	23.312	26.8	1024
RS24-MC71	Tierney and Tingley 2015	0.0874	0.0402	0.1155	0.0205	0.6156	0.1207	36.982	23.392	26.8	1387
RS26-MC73	Tierney and Tingley 2015	0.0771	0.0373	0.1111	0.0236	0.6423	0.1086	37.377	22.915	27.4	1324
RS29-MC79	Tierney and Tingley 2015	0.0768	0.0327	0.1125	0.0226	0.6377	0.1177	37.782	22.252	27.4	1521
RS31-MC85	Tierney and Tingley 2015	0.0795	0.0377	0.1249	0.0236	0.6174	0.1169	37.98	21.428	28	1538
RS39-MC95	Tierney and Tingley 2015	0.0721	0.0368	0.1015	0.0208	0.6691	0.0996	38.012	19.907	28.8	713
RS41-MC101	Tierney and Tingley 2015	0.0841	0.0401	0.1228	0.0238	0.617	0.1122	38.423	20.105	28.6	2309
RS42-MC113	Tierney and Tingley 2015	0.0749	0.0385	0.1079	0.0231	0.639	0.1167	38.608	19.64	28.8	1991
RS44-MC111	Tierney and Tingley 2015	0.0781	0.0372	0.1074	0.0211	0.6565	0.0998	38.722	19.458	28.8	1825
RS46-MC108	Tierney and Tingley 2015	0.0747	0.0367	0.1016	0.0194	0.6622	0.1054	39.053	19.135	29.1	1657
RS50-MC105	Tierney and Tingley 2015	0.0808	0.0422	0.1028	0.0186	0.6564	0.0992	39.057	18.602	29.2	501
RS51-MC366	Tierney and Tingley 2015	0.0904	0.043	0.0983	0.0195	0.6583	0.0905	40.022	17.362	29.3	475
RS53-MC367	Tierney and Tingley 2015	0.1146	0.0457	0.0807	0.019	0.6577	0.0823	41.67	15.56	29	604
S017	Tierney and Tingley 2015	0.182	0.05	0.064	0.011	0.635	0.058	119.5	20.25	26.9	2800
S031	Tierney and Tingley 2015	0.176	0.051	0.07	0.011	0.63	0.061	111	10.5	27.9	2521
S052	Tierney and Tingley 2015	0.152	0.046	0.068	0.016	0.66	0.059	115.5	7.25	28.5	1609
S072	Tierney and Tingley 2015	0.204	0.057	0.07	0.012	0.602	0.055	119.09	20.65	26.9	3447
S098	Tierney and Tingley 2015	0.181	0.048	0.065	0.012	0.642	0.051	119.88	19.31	27.2	4182
S137	Tierney and Tingley 2015	0.194	0.05	0.063	0.009	0.625	0.06	118.36	17.28	27.3	3986
S181	Tierney and Tingley 2015	0.18	0.049	0.072	0.009	0.628	0.061	117.84	17.29	27.2	3960
S199	Tierney and Tingley 2015	0.177	0.052	0.076	0.009	0.622	0.063	118.93	16.17	27.9	3675
Santa Barbara basin	Tierney and Tingley 2015	0.4363	0.0824	0.0507	0.0021	0.4135	0.0151	-120.017	34.217	14.8	530
SEPT01-07 BEN	Tierney and Tingley 2015	0.4892	0.0156	0.0052	0.003	0.4848	0.0021	-66.712	50.621	5.5	214
SO202-01-3	Tierney and Tingley 2015	0.4824	0.073	0.0388	0.004	0.3894	0.0124	152.92	44.0259	6	5282
SO202-02-4	Tierney and Tingley 2015	0.4922	0.0798	0.0409	0.0035	0.3726	0.0109	156.982	46.9689	5.3	4822
SO202-03-4	Tierney and Tingley 2015	0.4359	0.082	0.0535	0	0.4286	0	160.379	49.6141	4.9	5429
SO202-04-3	Tierney and Tingley 2015	0.4306	0.0924	0.041	0	0.4222	0.0138	163.16	51.8633	5.1	5273
SO202-05-3	Tierney and Tingley 2015	0.4564	0.0873	0.0533	0.0037	0.3981	0.0013	164.919	52.6961	5.3	3362
SO202-07-2	Tierney and Tingley 2015	0.4448	0.0736	0.0462	0.0038	0.4182	0.0134	167.699	51.2716	5.3	2349
SO202-08-1	Tierney and Tingley 2015	0.4852	0.0735	0.0378	0.004	0.3981	0.0013	170.821	50.5422	5.9	3630
SO202-09-2	Tierney and Tingley 2015	0.463	0.0649	0.0407	0.0067	0.4089	0.0158	175.161	49.6635	6.2	5028
SO202-10-2	Tierney and Tingley 2015	0.4877	0.0559	0.0327	0.0037	0.4088	0.0112	179.848	52.7427	5.3	1488
SO202-11-1	Tierney and Tingley 2015	0.7588	0.1155	0.0583	0	0.0674	0	178.9	53.1113	5.3	2704
SO202-13-4	Tierney and Tingley 2015	0.4475	0.07	0.043	0.0033	0.4241	0.0121	177.957	54.9788	5.5	1383
SO202-15-4	Tierney and Tingley 2015	0.4682	0.0602	0.0337	0.0036	0.4242	0.0102	-179.849	59.5124	4.4	3137
SO202-16-1	Tierney and Tingley 2015	0.447	0.0356	0.0165	0.003	0.4891	0.0088	-179.11	60.403	4.6	548
SO202-18-1	Tierney and Tingley 2015	0.4577	0.0751	0.0421	0.0032	0.4101	0.0118	-179.443	60.1263	4.6	1108
SO202-21-2	Tierney and Tingley 2015	0.4388	0.0687	0.028	0.0074	0.4461	0.0111	-170.328	54.7888	5.5	1911
SO202-22-1	Tierney and Tingley 2015	0.4963	0.0556	0.0275	0.0036	0.4093	0.0078	-168.812	54.5737	5.5	1478
SO202-23-4	Tierney and Tingley 2015	0.4385	0.0779	0.0555	0	0.4102	0.018	-160.504	52.1727	7.1	4613
SO202-24-2	Tierney and Tingley 2015	0.4415	0.0714	0.0533	0	0.421	0.0128	-157.193	53.0025	6.8	4565
SO202-25-1	Tierney and Tingley 2015	0.4447	0.0851	0.0521	0	0.4012	0.017	-152.686	54.0985	6.9	4588
SO202-26-1	Tierney and Tingley 2015	0.4467	0.0702	0.0467	0	0.4205	0.016	-150.383	54.6378	6.9	742
SO202-27-1	Tierney and Tingley 2015	0.4279	0.0794	0.0516	0.004	0.4229	0.0142	-149.597	54.2962	7	2916
SO202-28-1	Tierney and Tingley 2015	0.4391	0.0803	0.0512	0.0038	0.4121	0.0136	-148.884	54.4185	7.1	3710
SO202-29-5	Tierney and Tingley 2015	0.7312	0.1237	0.0765	0.0057	0.0613	0.0018	-148.895	52.028	7.4	3984
SO202-32-5	Tierney and Tingley 2015	0.4857	0.0611	0.0373	0.0035	0.4023	0.01	-158.5	45.5003	9.6	5302
SO202-33-5	Tierney and Tingley 2015	0.4465	0.0595	0.0288	0.003	0.4483	0.0139	-174.141	45.0838	7.8	6159
SO202-34-4	Tierney and Tingley 2015	0.444	0.0657	0.0392	0.0045	0.4295	0.0171	-177.676	40.8875	13.4	5713
SO202-36-6	Tierney and Tingley 2015	0.7234	0.1208	0.0704	0.0099	0.0728	0.0028	176.697	38.1898	15.6	4522
SO202-37-1	Tierney and Tingley 2015	0.7106	0.1187	0.0761	0	0.0904	0.0042	176.268	37.7675	16.9	3573
SO202-38-1	Tierney and Tingley 2015	0.4646	0.0621	0.0375	0	0.4102	0.0257	169.281	38.0435	16.1	5503
SO202-39-2	Tierney and Tingley 2015	0.4263	0.0665	0.0437	0	0.4439	0.0196	164.447	38.0115	16	5096
SO202-41-3	Tierney and Tingley 2015	0.4192	0.0646	0.0429	0.0064	0.4454	0.0214	160.334	38.4132	16.4	5408
SO202-42-3	Tierney and Tingley 2015	0.7518	0.1037	0.0667	0.0102	0.065	0.0027	157.628	38.8917	15.9	5535
SO202-45-2	Tierney and Tingley 2015	0.4224	0.0647	0.0428	0	0.4544	0.0157	149.485	40.2917	13	5476
SO95-17941	Tierney and Tingley 2015	0.2	0.059	0.078	0.011	0.597	0.056	118.48	21.52	26.7	2201
SO95-17942	Tierney and Tingley 2015	0.169	0.051	0.063	0.014	0.651	0.053	113.2	19.33	26.5	329
SO95-17943	Tierney and Tingley 2015	0.193	0.06	0.077	0.013	0.593	0.065	117.55	18.95	26.9	917
SO95-17944	Tierney and Tingley 2015	0.197	0.061	0.073	0.01	0.604	0.054	113.64	18.66	26.8	1219
SO95-17945	Tierney and Tingley 2015	0.193	0.066	0.07	0.009	0.613	0.048	113.78	18.13	26.8	2404
SO95-17946	Tierney and Tingley 2015	0.217	0.055	0.073	0.009	0.592	0.054	114.25	18.13	26.8	3465
SO95-17947	Tierney and Tingley 2015	0.2	0.063	0.086	0.012	0.575	0.065	116.03	18.47	26.9	3765
SO95-17948	Tierney and Tingley 2015	0.213	0.057	0.073	0.011	0.592	0.054	114.9	16.71	27.1	2841
SO95-17949	Tierney and Tingley 2015	0.203	0.064	0.087	0.011	0.573	0.06	115.17	17.35	26.9	2195
SO95-17950	Tierney and Tingley 2015	0.193	0.062	0.085	0.011	0.591	0.059	112.9	16.09	28	1868
SO95-17951	Tierney and Tingley 2015	0.183	0.057	0.077	0.01	0.625	0.049	113.41	16.29	27.3	2340
SO95-17952	Tierney and Tingley 2015	0.212	0.06	0.078	0.01	0.584	0.057	114.47	16.67	27.1	2864
SO95-17954	Tierney and Tingley 2015	0.205	0.061	0.078	0.012	0.586	0.058	111.53	14.8	27.4	1517
SO95-17955	Tierney and Tingley 2015	0.201	0.058	0.075	0.01	0.604	0.053	112.18	14.12	27.6	2404
SO95-17956	Tierney and Tingley 2015	0.213	0.062	0.085	0.01	0.571	0.059	112.59	13.85	27.7	3387
SO95-17957	Tierney and Tingley 2015	0.218	0.055	0.079	0.009	0.577	0.061	115.3	10.9	28.1	2197
SO95-17958	Tierney and Tingley 2015	0.199	0.052	0.076	0.009	0.606	0.058	115.08	11.62	28.2	2581
SO95-17959	Tierney and Tingley 2015	0.179	0.05	0.08	0.01	0.63	0.051	115.29	11.14	28.2	1957
SO95-17960	Tierney and Tingley 2015	0.179	0.052	0.077	0.01	0.633	0.049	115.56	10.12	28.1	1707
SO95-17962	Tierney and Tingley 2015	0.145	0.05	0.071	0.013	0.663	0.058	112.08	7.18	28.9	1970
SO95-17963	Tierney and Tingley 2015	0.135	0.05	0.077	0.014	0.667	0.058	112.67	6.17	28.5	1233
SO95-17964	Tierney and Tingley 2015	0.119	0.047	0.072	0.015	0.7	0.046	112.21	6.16	28.5	1556
SO95-17965	Tierney and Tingley 2015	0.137	0.049	0.07	0.013	0.67	0.06	112.55	6.16	28.5	889
South Frisian Front	Tierney and Tingley 2015	0.4781	0.043	0.0174	0.0068	0.4498	0.0049	4.5	53.5	10.6	24
ST-32	Tierney and Tingley 2015	0.5112	0.0533	0.022	0.0038	0.3923	0.0174	143.682	-56.002	2.3	3429
ST-34	Tierney and Tingley 2015	0.5417	0.0505	0.0176	0.003	0.3781	0.0092	142.002	-60.045	1.5	4354
ST-35	Tierney and Tingley 2015	0.5119	0.0597	0.0233	0.0038	0.3865	0.0148	141.675	-62.013	0.4	4265
ST-45	Tierney and Tingley 2015	0.5317	0.0235	0.0069	0.0027	0.4308	0.0044	46.722	84.009	1.3	3960
Station A	Tierney and Tingley 2015	0.4826	0.0197	0.0051	0.0025	0.487	0.0031	-79.712	60.621	6.8	129
Station B	Tierney and Tingley 2015	0.4794	0.0181	0.0048	0.0025	0.4917	0.0035	-81.712	60.621	8.7	156
SX15	Tierney and Tingley 2015	0.175	0.05	0.069	0.012	0.64	0.054	119.5	21.25	27	2500
T89-10	Tierney and Tingley 2015	0.3429	0.0696	0.0654	0.0088	0.4751	0.0381	1.322	-2.077	25	2088
T89-12	Tierney and Tingley 2015	0.3484	0.0695	0.0632	0.0035	0.4421	0.0733	7.973	-5.2	26.5	4068
T89-13	Tierney and Tingley 2015	0.1884	0.0503	0.0652	0.0102	0.6468	0.0391	9.238	-4.107	25.4	3092
T89-14	Tierney and Tingley 2015	0.2911	0.0759	0.0732	0.0142	0.5139	0.0318	9.69	-3.509	25.3	868
T89-15	Tierney and Tingley 2015	0.2987	0.0774	0.0816	0.0133	0.4918	0.0373	10.022	-4.213	25.2	1930
T89-16	Tierney and Tingley 2015	0.2723	0.0743	0.0804	0.0173	0.5192	0.0363	11.228	-5.705	25	826
T89-17	Tierney and Tingley 2015	0.3191	0.0734	0.0738	0.0164	0.4724	0.0447	7.805	-6.818	26.3	4253
T89-19	Tierney and Tingley 2015	0.3389	0.0778	0.0765	0.0126	0.4624	0.0318	9.955	-6.043	26.1	3140
T89-20	Tierney and Tingley 2015	0.2737	0.0661	0.0746	0.0109	0.5372	0.0375	11.537	-7.307	25.9	1080
T89-21	Tierney and Tingley 2015	0.2628	0.0708	0.0743	0.0158	0.5438	0.0324	11.993	-7.275	25.9	490
T89-22	Tierney and Tingley 2015	0.2571	0.074	0.0754	0.0137	0.5483	0.0315	12.067	-7.13	25.9	200
T89-23	Tierney and Tingley 2015	0.2758	0.0678	0.0733	0.014	0.5384	0.0307	12.108	-8.513	24.9	796
T89-24	Tierney and Tingley 2015	0.3241	0.0813	0.0848	0.01	0.4627	0.0371	12.058	-8.908	24.9	2157
T89-25	Tierney and Tingley 2015	0.2383	0.0581	0.0735	0.0118	0.5901	0.0283	10.608	-9.368	25.7	4164
T89-28	Tierney and Tingley 2015	0.1695	0.0709	0.0892	0.0113	0.6436	0.0157	5.637	-10.387	24.6	5307
T89-30	Tierney and Tingley 2015	0.3931	0.0796	0.0613	0.0051	0.4273	0.0336	8.22	-14.877	22.1	4752
T89-32	Tierney and Tingley 2015	0.335	0.0896	0.0627	0.0087	0.4717	0.0324	10.668	-14.893	21.9	3342
T89-33	Tierney and Tingley 2015	0.3645	0.0895	0.0729	0.0126	0.4322	0.0284	11.62	-14.96	23.2	2027
T89-34	Tierney and Tingley 2015	0.322	0.0759	0.0599	0.01	0.5052	0.0269	11.967	-15.127	20.8	999
T89-35	Tierney and Tingley 2015	0.3168	0.0642	0.0499	0.0097	0.534	0.0254	11.62	-17.293	18.5	802
T89-36	Tierney and Tingley 2015	0.3522	0.0556	0.0336	0.0111	0.5269	0.0206	13.838	-14.96	23.2	131
T89-40	Tierney and Tingley 2015	0.3533	0.0909	0.0732	0.0068	0.4476	0.0282	6.782	-21.617	20	3060
T89-41	Tierney and Tingley 2015	0.3473	0.0911	0.0716	0.0058	0.4471	0.0371	6	-20.8	20.2	4282
T89-47	Tierney and Tingley 2015	0.3528	0.0878	0.0719	0.0055	0.4494	0.0326	4.427	-8.787	25.1	5362
TSP-1	Tierney and Tingley 2015	0.3961	0.0619	0.0392	0.006	0.4718	0.0251	147.49	-47.572	10.2	1301
TSP-2	Tierney and Tingley 2015	0.4492	0.0709	0.0411	0.0055	0.4167	0.0166	146.9	-48.127	9.7	2283
TSP-3	Tierney and Tingley 2015	0.454	0.0675	0.04	0.0043	0.4194	0.0149	146.41	-48.558	9.7	2897
WM1 MC33	Tierney and Tingley 2015	0.5034	0.0266	0.0123	0.0042	0.4472	0.0063	-124.3	46.333	11.8	70
WM2 MC30	Tierney and Tingley 2015	0.4653	0.0275	0.0153	0.0055	0.4781	0.0083	-124.383	46.5	11.8	90
WM3 MC28	Tierney and Tingley 2015	0.472	0.0255	0.0109	0.0021	0.4842	0.0054	-124.633	46.667	11.8	150
WM4 MC21	Tierney and Tingley 2015	0.4461	0.053	0.0288	0.0038	0.4565	0.0117	-125	46.817	12.4	600
WM5 MC20	Tierney and Tingley 2015	0.4304	0.0617	0.0385	0.0038	0.451	0.0147	-125.2	46.75	12.4	1000
XGA7-MC123	Tierney and Tingley 2015	0.2102	0.0669	0.0783	0.0125	0.5662	0.066	47.915	13.078	28.1	2215

## Sheet: OPTiMAL (Op3)
Modern calibration data as Op1 but EXCLUDES Arctic locations with observed SSTs below 3ºC. As with TT13 (NoNorth) calibration data of TT14 this is the current PREFERENCE for OPTiMAL SST estimation.
Core name	Source	GDGT-0	GDGT-1	GDGT-2	GDGT-3	Crenarchaeol	Cren'	longitude	latitude	Sea Surface Temp	water depth
1	Tierney and Tingley 2015	0.285	0.059	0.039	0.015	0.596	0.006	122.67	32	16	30
2	Tierney and Tingley 2015	0.283	0.065	0.043	0.022	0.587	0	123	32	16	37
3	Tierney and Tingley 2015	0.257	0.053	0.037	0.013	0.635	0.005	122.33	31.75	16.8	23
4	Tierney and Tingley 2015	0.3073	0.0561	0.041	0.014	0.5756	0.006	123	31.75	16.8	36
5	Tierney and Tingley 2015	0.3046	0.0581	0.0431	0.014	0.5731	0.007	123.33	31.75	17.8	33
6	Tierney and Tingley 2015	0.432	0.115	0.057	0.021	0.37	0.005	122.17	31.5	16.8	7
7	Tierney and Tingley 2015	0.449	0.029	0.015	0.005	0.5	0.002	122.33	31.5	16.8	16
8	Tierney and Tingley 2015	0.2667	0.0599	0.041	0.015	0.6094	0.008	122.5	31.5	16.8	28
9	Tierney and Tingley 2015	0.273	0.064	0.045	0.018	0.591	0.009	122.67	31.5	16.8	38
10	Tierney and Tingley 2015	0.2767	0.0629	0.043	0.016	0.5944	0.007	123	31.5	16.8	32
11	Tierney and Tingley 2015	0.283	0.05	0.034	0.012	0.613	0.008	122.5	31.5	16.8	22
12	Tierney and Tingley 2015	0.263	0.057	0.04	0.014	0.619	0.007	122.67	31.25	16.8	37
13	Tierney and Tingley 2015	0.2807	0.0599	0.049	0.017	0.5854	0.008	122	31.25	16.8	7
14	Tierney and Tingley 2015	0.273	0.059	0.044	0.015	0.602	0.007	122.17	31	16.8	8
15	Tierney and Tingley 2015	0.2687	0.0519	0.038	0.013	0.6214	0.007	122.33	31	16.8	8
16	Tierney and Tingley 2015	0.2677	0.0539	0.036	0.013	0.6224	0.007	122.67	31	16.8	20
17	Tierney and Tingley 2015	0.264	0.038	0.046	0.015	0.63	0.007	122	30.75	19.7	10
18	Tierney and Tingley 2015	0.2557	0.0529	0.037	0.014	0.6314	0.009	122.5	30.75	19.7	14
19	Tierney and Tingley 2015	0.27	0.06	0.041	0.015	0.606	0.008	122.67	30.75	19.7	38
20	Tierney and Tingley 2015	0.4456	0.0639	0.0639	0.022	0.3896	0.015	123	30.75	19.7	46
20	Tierney and Tingley 2015	0.2882	0.0808	0.0861	0.0141	0.4886	0.0422	-48.35	4.04	27.4	1088
21	Tierney and Tingley 2015	0.278	0.056	0.043	0.015	0.601	0.007	122	31	16.8	11
21	Tierney and Tingley 2015	0.2606	0.0745	0.0824	0.0133	0.5319	0.0372	-48.54	3.96	27.4	738
22	Tierney and Tingley 2015	0.2322	0.0521	0.042	0.015	0.6517	0.007	122.33	30.5	19.7	24
23	Tierney and Tingley 2015	0.243	0.055	0.04	0.014	0.64	0.008	122.67	30.5	19.7	33
23	Tierney and Tingley 2015	0.2993	0.0743	0.075	0.0102	0.5085	0.0327	-49.06	3.68	27.5	107
24	Tierney and Tingley 2015	0.3606	0.0599	0.038	0.014	0.5175	0.01	124.5	32	17.7	39
25	Tierney and Tingley 2015	0.3263	0.0581	0.039	0.013	0.5546	0.009	125	32	17.8	47
25	Tierney and Tingley 2015	0.1533	0.0499	0.072	0.0441	0.6527	0.0279	-49.86	3.19	27.5	32
26	Tierney and Tingley 2015	0.295	0.052	0.035	0.011	0.6	0.007	124.5	31.5	17.7	44
27	Tierney and Tingley 2015	0.272	0.056	0.04	0.014	0.607	0.011	125	31.5	17.7	48
28	Tierney and Tingley 2015	0.2448	0.0569	0.041	0.015	0.6354	0.007	122.5	31	19.7	18
29	Tierney and Tingley 2015	0.2378	0.0559	0.043	0.016	0.6394	0.008	122.5	30	20.2	18
30	Tierney and Tingley 2015	0.269	0.063	0.047	0.017	0.594	0.01	124.5	30	20.5	68
31	Tierney and Tingley 2015	0.2478	0.0629	0.047	0.018	0.6114	0.013	123.11	29.47	20.8	63
32	Tierney and Tingley 2015	0.241	0.063	0.048	0.018	0.615	0.015	123.38	29.32	20.8	71
33	Tierney and Tingley 2015	0.2527	0.0649	0.049	0.018	0.6014	0.014	123.8	29.09	20.8	77
34	Tierney and Tingley 2015	0.241	0.062	0.046	0.017	0.62	0.014	122.43	28.29	21.6	66
35	Tierney and Tingley 2015	0.39	0.054	0.03	0.01	0.509	0.007	123.01	33	16.7	32
36	Tierney and Tingley 2015	0.387	0.056	0.029	0.011	0.512	0.005	119.67	35	13.9	21
37	Tierney and Tingley 2015	0.424	0.042	0.019	0.006	0.505	0.004	121	35	13.9	37
38	Tierney and Tingley 2015	0.428	0.035	0.016	0.005	0.512	0.004	123.5	35.01	15.4	77
39	Tierney and Tingley 2015	0.432	0.041	0.02	0.005	0.498	0.004	121.99	36	15.2	39
40	Tierney and Tingley 2015	0.3197	0.047	0.027	0.009	0.5914	0.006	124.01	33.01	17.5	49
41	Tierney and Tingley 2015	0.4625	0.03	0.012	0.004	0.4885	0.003	124	36	14.9	77
42	Tierney and Tingley 2015	0.471	0.031	0.013	0.004	0.478	0.003	125.12	36.92	13.8	51
43	Tierney and Tingley 2015	0.4635	0.025	0.009	0.004	0.4965	0.002	124.12	36.92	14.6	76
43	Tierney and Tingley 2015	0.0894	0.0531	0.0761	0.0534	0.7057	0.0224	-48.05	2.09	27.8	65
44	Tierney and Tingley 2015	0.521	0.03	0.015	0.005	0.426	0.003	123.62	36.92	14.9	72
45	Tierney and Tingley 2015	0.436	0.027	0.01	0.004	0.519	0.004	125.03	35.85	14.9	53
46	Tierney and Tingley 2015	0.39	0.04	0.023	0.007	0.535	0.005	124.03	35.85	15.2	77
47	Tierney and Tingley 2015	0.391	0.034	0.016	0.005	0.551	0.003	121.53	35.85	15.2	38
48	Tierney and Tingley 2015	0.4264	0.033	0.014	0.004	0.5185	0.004	124.82	34.72	15.7	81
49	Tierney and Tingley 2015	0.4625	0.034	0.015	0.005	0.4795	0.004	123.52	34.72	16	77
49	Tierney and Tingley 2015	0.3023	0.0766	0.0766	0.0104	0.5031	0.0311	-45.36	1.64	27.4	-999
50	Tierney and Tingley 2015	0.39	0.031	0.013	0.004	0.56	0.002	121.53	34.72	15.2	42
51	Tierney and Tingley 2015	0.3666	0.042	0.023	0.006	0.5594	0.003	121.03	34.72	15.2	23
52	Tierney and Tingley 2015	0.385	0.069	0.044	0.015	0.477	0.01	125	32.5	17.8	58
53	Tierney and Tingley 2015	0.4016	0.0619	0.034	0.012	0.4815	0.009	125.53	33.57	18	87
54	Tierney and Tingley 2015	0.421	0.055	0.028	0.006	0.481	0.009	124.03	33.57	17.5	71
54	Tierney and Tingley 2015	0.3659	0.064	0.0579	0.0091	0.4787	0.0244	-44.35	0.66	27.4	2372
55	Tierney and Tingley 2015	0.4494	0.043	0.02	0.007	0.4745	0.006	123.53	33.57	16.7	66
56	Tierney and Tingley 2015	0.3734	0.038	0.019	0.006	0.5596	0.004	122.53	33.57	15.8	39
57	Tierney and Tingley 2015	0.3257	0.046	0.029	0.009	0.5864	0.004	122.03	33.57	15.8	24
58	Tierney and Tingley 2015	0.247	0.053	0.044	0.011	0.641	0.004	121.53	33.57	15.1	17
13a	Tierney and Tingley 2015	0.2947	0.0801	0.0883	0.0154	0.4795	0.0421	-48.61	4.46	27.4	1711
22b	Tierney and Tingley 2015	0.2995	0.0887	0.0973	0.0171	0.4548	0.0427	-48.61	3.95	27.4	640
28b	Tierney and Tingley 2015	0.2737	0.0721	0.0792	0.0113	0.5283	0.0354	-48.17	3.78	27.4	1014
32b	Tierney and Tingley 2015	0.272	0.0772	0.0868	0.0127	0.5111	0.0402	-47.64	3.07	27.3	1028
32c	Tierney and Tingley 2015	0.2705	0.0691	0.0763	0.0115	0.5381	0.0345	-47.31	3.65	27.3	2079
42b	Tierney and Tingley 2015	0.2693	0.0666	0.0712	0.0155	0.5433	0.0341	-47.74	2.85	27.3	609
42d	Tierney and Tingley 2015	0.1235	0.0671	0.0859	0.0494	0.6459	0.0282	-47.85	2.57	27.3	110
44c	Tierney and Tingley 2015	0.277	0.0741	0.0748	0.0104	0.5281	0.0356	-46.25	3.39	27.4	3375
60b	Tierney and Tingley 2015	0.2872	0.0749	0.0769	0.0103	0.519	0.0318	-42.74	-1.03	27.1	3113
A5	Tierney and Tingley 2015	0.17	0.0597	0.0518	0.0159	0.6826	0.0201	114.98	20.9958	25.8	102
A7	Tierney and Tingley 2015	0.1943	0.0548	0.0397	0.0136	0.6863	0.0114	114.501	21.5033	25.1	73
A9	Tierney and Tingley 2015	0.2156	0.0465	0.0297	0.0111	0.69	0.007	113.999	22.0083	25.1	33
AII-107-6-17	Tierney and Tingley 2015	0.5008	0.0565	0.0232	0.0054	0.4006	0.0134	-22.182	-55.278	0.8	3926
AII-107-6-18	Tierney and Tingley 2015	0.4994	0.06	0.0267	0.0046	0.3962	0.0132	-21.975	-55.27	1	4119
AII-107-6-20	Tierney and Tingley 2015	0.4539	0.0613	0.0295	0.0065	0.4284	0.0205	-17.952	-54.857	1.8	4119
AII-107-6-24	Tierney and Tingley 2015	0.5112	0.0676	0.0207	0.0032	0.3883	0.0091	-8.718	-54.857	0.8	3255
AII-107-6-27	Tierney and Tingley 2015	0.5152	0.0698	0.0209	0.0042	0.3832	0.0068	-3.518	-54.753	0.7	2921
AII-107-6-70	Tierney and Tingley 2015	0.4745	0.0658	0.0303	0.0053	0.4134	0.0106	7.763	-47.535	5.3	2473
AII-107-6-72	Tierney and Tingley 2015	0.4833	0.0662	0.032	0.0052	0.4039	0.0096	8.008	-46.822	6.5	2270
AII-GGC-22	Tierney and Tingley 2015	0.5461	0.0608	0.0197	0.0034	0.3622	0.0078	-3.33	-54.792	0.7	2768
AII-GGC-28	Tierney and Tingley 2015	0.5143	0.06	0.0249	0.0031	0.3896	0.0081	7.542	-46.875	6.1	2517
AII-GGC-9	Tierney and Tingley 2015	0.5326	0.0502	0.0167	0.0032	0.39	0.0072	-32.498	-56.195	1	3223
All-093-19-96	Tierney and Tingley 2015	0.1332	0.057	0.0874	0.0257	0.6258	0.071	34.572	28.535	25.3	963
AMR-1	Tierney and Tingley 2015	0.5512	0.0341	0.0123	0.0028	0.3872	0.0124	140.237	-63.855	-0.4	3726
AMR-2	Tierney and Tingley 2015	0.5317	0.0322	0.011	0.0028	0.4109	0.0113	139.978	-64.658	-0.2	2948
BOFS 5K 0-1	Tierney and Tingley 2015	0.4118	0.0705	0.0414	0.0051	0.4522	0.0189	-21.688	50.865	12.8	3547
BOFS 8K 0-1	Tierney and Tingley 2015	0.4591	0.0754	0.0396	0.0064	0.4033	0.0162	-22.04	52.5	12.3	4045
BP97-47	Tierney and Tingley 2015	0.4965	0.0358	0.0139	0.0097	0.4392	0.0049	73.7485	72.5835	3.3	18
BP99-13	Tierney and Tingley 2015	0.4697	0.0199	0.0079	0.0049	0.494	0.0036	78	74.4973	3.4	36
BP99-18	Tierney and Tingley 2015	0.4941	0.0457	0.0186	0.011	0.4258	0.0048	74	72.333	3.3	35
BP99-19	Tierney and Tingley 2015	0.4859	0.0464	0.0213	0.0103	0.4297	0.0064	74.1858	72.189	3.3	35
BP99-20	Tierney and Tingley 2015	0.4871	0.034	0.0137	0.0082	0.4524	0.0046	74.7317	72.5135	3.3	35
BP99-25	Tierney and Tingley 2015	0.4646	0.0232	0.0079	0.0067	0.4926	0.0049	73.996	74.001	3.6	35
BS 01E-27	Tierney and Tingley 2015	0.4482	0.0434	0.0254	0.0116	0.4596	0.0118	29.5	45.5	13.3	27
BS 02E-105	Tierney and Tingley 2015	0.3918	0.0361	0.0134	0.0053	0.5428	0.0107	32	45	13.4	105
BS 04E-114	Tierney and Tingley 2015	0.3767	0.0369	0.0147	0.0061	0.5565	0.0091	30	44.5	13.8	114
BS 05E-564	Tierney and Tingley 2015	0.4058	0.0328	0.015	0.0035	0.5319	0.0109	30.5	44	14.4	564
BS 06E-335	Tierney and Tingley 2015	0.3819	0.0332	0.0175	0.0035	0.5527	0.0111	35	44.5	14.8	335
BS 07E-1288	Tierney and Tingley 2015	0.4148	0.0306	0.0141	0.0038	0.529	0.0078	34	44	14.2	1288
BS 09E-2129	Tierney and Tingley 2015	0.365	0.0368	0.0218	0.0055	0.5582	0.0128	34	45.5	14.1	2129
BS2 Arkona basin	Tierney and Tingley 2015	0.3462	0.0186	0.0065	0.0035	0.6216	0.0035	14.712	54.621	8.9	47
BS3	Tierney and Tingley 2015	0.4688	0.0233	0.0078	0.0029	0.4936	0.0036	16.712	55.621	8.4	66
BS4 Gotland deep	Tierney and Tingley 2015	0.4519	0.018	0.0066	0.0026	0.5173	0.0036	19.712	57.621	7.8	115
BS5 Gotland deep	Tierney and Tingley 2015	0.4333	0.0216	0.0072	0.0022	0.5319	0.0037	20.712	57.621	7.8	240
BS6 Baltic proper	Tierney and Tingley 2015	0.4062	0.0218	0.0077	0.0021	0.558	0.0042	20.712	58.621	7.7	175
BS625	Tierney and Tingley 2015	0.5419	0.0398	0.0117	0.0053	0.3975	0.0038	21.75	71.721	6.6	360
BS627	Tierney and Tingley 2015	0.5492	0.0329	0.0092	0.0042	0.4016	0.003	24.048	72.322	5.9	264
BS629	Tierney and Tingley 2015	0.5574	0.0261	0.0077	0.0037	0.4023	0.0028	24.251	73	5	404
BS631	Tierney and Tingley 2015	0.5517	0.0195	0.0057	0.0031	0.4178	0.0023	24.46	73.663	5	451
BS649	Tierney and Tingley 2015	0.55	0.0172	0.0052	0.003	0.4225	0.002	28.566	74.535	3.8	394
BS651	Tierney and Tingley 2015	0.5596	0.0176	0.0053	0.0031	0.4126	0.0017	26.065	74.63	3.7	317
BS653	Tierney and Tingley 2015	0.5515	0.0198	0.0058	0.0031	0.4178	0.0021	25.798	73.972	4.8	441
BS655	Tierney and Tingley 2015	0.5642	0.0242	0.0068	0.0034	0.3991	0.0022	25.532	73.297	4.8	412
BS657	Tierney and Tingley 2015	0.5486	0.0281	0.0091	0.0042	0.4072	0.0028	25.269	72.634	5.7	268
BS659	Tierney and Tingley 2015	0.5421	0.0341	0.0104	0.0047	0.4057	0.0029	25.047	71.972	6.2	256
BS661	Tierney and Tingley 2015	0.5258	0.0389	0.0118	0.0053	0.4145	0.0037	22.758	71.371	6.4	408
BS665	Tierney and Tingley 2015	0.5436	0.0282	0.0085	0.0042	0.4126	0.0031	28.399	72.167	5.4	289
BS667	Tierney and Tingley 2015	0.5681	0.0274	0.0084	0.0037	0.3898	0.0026	28.754	72.832	5.4	305
BS669	Tierney and Tingley 2015	0.5527	0.021	0.0062	0.0032	0.4143	0.0025	29.146	73.501	4.7	414
BS671	Tierney and Tingley 2015	0.5431	0.019	0.0057	0.0032	0.4267	0.0024	-1.315	62.643	8.6	1702
BS690	Tierney and Tingley 2015	0.5295	0.0234	0.007	0.0035	0.4339	0.0028	30.947	71.013	5.8	283
BS692	Tierney and Tingley 2015	0.5183	0.0256	0.0078	0.0037	0.4415	0.003	31.712	70.621	5.5	252
BY31 Landsort deep	Tierney and Tingley 2015	0.4429	0.0215	0.0082	0.0025	0.5211	0.0038	18.712	58.621	7.3	466
BY310 Landsort deep oxic	Tierney and Tingley 2015	0.4957	0.0233	0.0073	0.0028	0.4676	0.0034	17.712	58.621	7.3	54
BY5 Bornholm	Tierney and Tingley 2015	0.4313	0.0234	0.0085	0.0028	0.5308	0.0032	15.712	55.621	8.4	89
Cariaco Basin	Tierney and Tingley 2015	0.1624	0.0651	0.0937	0.0237	0.6034	0.0516	-65.6	10.667	26.6
CB1 MC15	Tierney and Tingley 2015	0.434	0.0846	0.0547	0.0035	0.4062	0.0169	-128	46.75	12.2	2700
CB2 MC19	Tierney and Tingley 2015	0.4052	0.0704	0.0466	0.0037	0.4606	0.0135	-125.833	46.767	12.4	2700
CHN-043-1-4	Tierney and Tingley 2015	0.0894	0.0411	0.1019	0.0264	0.6366	0.1047	40.167	17.65	29.3	1470
CHN-043-1-5	Tierney and Tingley 2015	0.1397	0.0478	0.0931	0.0256	0.6034	0.0904	40.167	17.65	29.3	1296
CHN-115-4-34	Tierney and Tingley 2015	0.4471	0.0779	0.0337	0.0109	0.4201	0.0103	5.33	-51	2.4	3788
CHN-115-4-35	Tierney and Tingley 2015	0.5434	0.061	0.0192	0.0039	0.3655	0.0069	0.1	-53.6	0.7	2643
CHN-115-4-43	Tierney and Tingley 2015	0.4461	0.0578	0.0334	0.0096	0.4461	0.007	0.08	-54.592	-0.1	1260
CL03-35 BC	Tierney and Tingley 2015	0.4682	0.034	0.0127	0.0032	0.4773	0.0047	-58.712	46.621	6.3	370
D357 St. 0	Tierney and Tingley 2015	0.4141	0.0584	0.0268	0.0096	0.4683	0.0228	17.9736	-30.197	15.7	242
D357 St. 1	Tierney and Tingley 2015	0.3988	0.0759	0.0503	0.0078	0.4456	0.0217	17.0363	-34.6213	17.9	2620
D357 St. 11	Tierney and Tingley 2015	0.3716	0.0713	0.0544	0.0088	0.4631	0.0307	7.6704	-39.2945	12.8	5269
D357 St. 13	Tierney and Tingley 2015	0.399	0.0399	0.0267	0.005	0.516	0.0133	17.5695	-34.3878	17.9	1168
D357 St. 3	Tierney and Tingley 2015	0.3508	0.0783	0.0623	0.0086	0.4705	0.0295	13.1091	-36.4956	18	4900
D357 St. 6	Tierney and Tingley 2015	0.412	0.0783	0.0462	0.0044	0.4412	0.018	0.9075	-40.0032	11.3	4928
D357 St. 8	Tierney and Tingley 2015	0.3792	0.0549	0.0283	0.0069	0.5121	0.0186	17.9736	-34.3263	17.9	733
DNT05-22 BEN	Tierney and Tingley 2015	0.4634	0.0432	0.0123	0.005	0.4733	0.0029	-58.712	46.621	6.3	18
Drammensfjord D0-5	Tierney and Tingley 2015	0.4901	0.0251	0.0099	0.0035	0.467	0.0043	10.423	59.633	9.1	100
Drammensfjord-1	Tierney and Tingley 2015	0.4948	0.0346	0.0172	0.004	0.4445	0.0049	10.396	59.668	9.1	100
Drammensfjord-2	Tierney and Tingley 2015	0.4901	0.0251	0.0099	0.0035	0.467	0.0043	10.423	59.633	9.1	110
ENAM9407	Tierney and Tingley 2015	0.528	0.0321	0.0098	0.0035	0.4216	0.0049	-4.032	62.956	8	2060
Frisian Front	Tierney and Tingley 2015	0.4632	0.0393	0.0171	0.0058	0.471	0.0034	4.5	53.7	10.6	34
G2-85 7 0-1	Tierney and Tingley 2015	0.242	0.0689	0.0672	0.0181	0.5573	0.0464	123.595	-9.003	28.1	-999
G2-85 pist 0-1	Tierney and Tingley 2015	0.2343	0.0718	0.072	0.0195	0.5564	0.0459	123.64	-8.99	28.1	-999
G2-9 box 0-1	Tierney and Tingley 2015	0.2236	0.0732	0.0777	0.0195	0.5465	0.0595	123.592	-9.343	28.1	2720
G2-9 trp 0-1	Tierney and Tingley 2015	0.2023	0.0696	0.0813	0.0179	0.5764	0.0524	123.592	-9.34	28.1	2720
G6-3 0-1	Tierney and Tingley 2015	0.2366	0.0663	0.0781	0.0148	0.5488	0.0553	117.193	-10.152	28.3	1182
GeoB10016-2	Tierney and Tingley 2015	0.2172	0.0643	0.0942	0.0177	0.5573	0.0494	96.66	1.597	28.7	1900
GeoB10026-2	Tierney and Tingley 2015	0.2074	0.0763	0.1012	0.0184	0.5411	0.0556	99.521	-0.944	28.7	1641
GeoB10032-1	Tierney and Tingley 2015	0.2145	0.0729	0.0941	0.0179	0.5477	0.053	99.681	-1.667	28.7	1758
GeoB10034-3	Tierney and Tingley 2015	0.2311	0.0734	0.0933	0.017	0.5364	0.0488	101.499	-4.165	28.2	995
GeoB10038-3	Tierney and Tingley 2015	0.2877	0.0702	0.0831	0.014	0.503	0.0419	103.246	-5.937	27.6	1891
GeoB10040-3	Tierney and Tingley 2015	0.2899	0.0724	0.0829	0.0143	0.4977	0.0427	102.859	-6.476	27.9	2605
GeoB10042-2	Tierney and Tingley 2015	0.2477	0.071	0.0803	0.0187	0.5368	0.0455	104.643	-7.113	28	2457
GeoB10701-4	Tierney and Tingley 2015	0.285	0.074	0.08	0.015	0.515	0.031	17.467	40	18.9	1186
GeoB10703-3	Tierney and Tingley 2015	0.356	0.054	0.04	0.01	0.509	0.03	17.742	40	18.9	277
GeoB10704-3	Tierney and Tingley 2015	0.356	0.062	0.038	0.013	0.521	0.01	17.833	40	18.9	219
GeoB10705-3	Tierney and Tingley 2015	0.354	0.062	0.039	0.011	0.525	0.009	17.913	39.853	18.9	128
GeoB10707-4	Tierney and Tingley 2015	0.295	0.064	0.064	0.011	0.54	0.026	17.583	39.783	18.9	1598
GeoB10708-3	Tierney and Tingley 2015	0.306	0.07	0.061	0.011	0.533	0.02	17.733	39.808	18.9	686
GeoB10709-4	Tierney and Tingley 2015	0.363	0.059	0.036	0.01	0.516	0.016	17.893	39.757	18.9	173
GeoB10710-4	Tierney and Tingley 2015	0.298	0.067	0.065	0.011	0.527	0.031	17.683	39.592	18.9	2040
GeoB10711-3	Tierney and Tingley 2015	0.293	0.073	0.067	0.014	0.52	0.035	17.8	39.683	18.9	1049
GeoB10712-3	Tierney and Tingley 2015	0.328	0.063	0.054	0.012	0.519	0.024	17.862	39.727	18.9	618
GeoB10713-3	Tierney and Tingley 2015	0.37	0.059	0.039	0.014	0.507	0.012	18.283	39.692	18.9	127
GeoB10714-3	Tierney and Tingley 2015	0.34	0.066	0.044	0.012	0.521	0.017	18.283	39.64	18.9	207
GeoB10715-3	Tierney and Tingley 2015	0.274	0.078	0.066	0.014	0.537	0.03	18.283	39.559	18.9	697
GeoB10716-3	Tierney and Tingley 2015	0.275	0.071	0.076	0.011	0.523	0.044	18.283	39.345	18.9	1328
GeoB10717-3	Tierney and Tingley 2015	0.359	0.063	0.036	0.013	0.524	0.005	18.08	39.742	18.9	96
GeoB10718-3	Tierney and Tingley 2015	0.347	0.066	0.039	0.013	0.525	0.01	18.058	39.693	18.9	219
GeoB10719-3	Tierney and Tingley 2015	0.302	0.068	0.055	0.013	0.528	0.034	18.042	39.653	18.9	616
GeoB10720-5	Tierney and Tingley 2015	0.253	0.095	0.087	0.012	0.503	0.051	17.978	39.507	18.9	1387
GeoB10721-3	Tierney and Tingley 2015	0.34	0.069	0.046	0.013	0.516	0.015	16.767	42.166	18.1	203
GeoB10722-3	Tierney and Tingley 2015	0.371	0.069	0.037	0.012	0.503	0.008	16.5	42.167	18.1	142
GeoB10723-3	Tierney and Tingley 2015	0.375	0.058	0.029	0.011	0.51	0.017	16	42.167	17.8	114
GeoB10724-3	Tierney and Tingley 2015	0.387	0.052	0.023	0.01	0.51	0.018	16.217	42.001	18.1	50
GeoB10725-3	Tierney and Tingley 2015	0.403	0.048	0.021	0.009	0.507	0.011	16.216	42.05	18.1	94
GeoB10726-3	Tierney and Tingley 2015	0.382	0.051	0.024	0.008	0.526	0.009	16.717	42	18.1	183
GeoB10727-3	Tierney and Tingley 2015	0.373	0.067	0.029	0.01	0.511	0.01	16.617	41.801	18.1	101
GeoB10728-3	Tierney and Tingley 2015	0.351	0.072	0.048	0.013	0.496	0.02	16.858	41.783	18.1	194
GeoB10729-4	Tierney and Tingley 2015	0.305	0.071	0.057	0.014	0.525	0.029	17.191	41.647	18.1	712
GeoB10730-3	Tierney and Tingley 2015	0.326	0.073	0.048	0.013	0.527	0.012	17.05	41.5	18.1	183
GeoB10731-3	Tierney and Tingley 2015	0.377	0.055	0.027	0.009	0.523	0.01	16.658	41.5	18.1	96
GeoB10732-3	Tierney and Tingley 2015	0.376	0.046	0.019	0.007	0.549	0.003	16.407	41.5	18.1	51
GeoB10733-3	Tierney and Tingley 2015	0.379	0.055	0.029	0.01	0.522	0.006	16.225	41.5	18.1	22
GeoB10734-3	Tierney and Tingley 2015	0.382	0.044	0.021	0.008	0.54	0.005	16.242	41.667	18.1	18
GeoB10735-3	Tierney and Tingley 2015	0.305	0.07	0.059	0.012	0.528	0.025	17.308	41.5	18.1	733
GeoB10736-3	Tierney and Tingley 2015	0.356	0.062	0.035	0.011	0.524	0.013	18.192	40.758	18.8	123
GeoB10737-3	Tierney and Tingley 2015	0.37	0.06	0.034	0.01	0.515	0.01	18.329	40.625	18.8	113
GeoB10738-3	Tierney and Tingley 2015	0.357	0.061	0.035	0.013	0.511	0.023	18.467	40.546	18.8	112
GeoB10739-3	Tierney and Tingley 2015	0.324	0.07	0.051	0.011	0.521	0.023	18.642	40.5	18.8	565
GeoB10740-3	Tierney and Tingley 2015	0.345	0.062	0.037	0.012	0.531	0.011	18.583	40.392	18.9	128
GeoB10741-3	Tierney and Tingley 2015	0.352	0.063	0.039	0.011	0.521	0.013	18.667	40.233	18.9	287
GeoB10742-3	Tierney and Tingley 2015	0.3	0.07	0.059	0.012	0.534	0.024	18.776	39.716	18.9	599
GeoB10743-3	Tierney and Tingley 2015	0.346	0.061	0.04	0.014	0.539	0	18.642	39.825	18.9	124
GeoB10744-3	Tierney and Tingley 2015	0.341	0.063	0.038	0.012	0.535	0.011	18.6	39.85	18.9	117
GeoB10746-3	Tierney and Tingley 2015	0.338	0.062	0.037	0.011	0.539	0.014	16.758	39.908	18.9	157
GeoB10747-3	Tierney and Tingley 2015	0.323	0.064	0.041	0.013	0.54	0.018	16.975	39.725	18.9	246
GeoB10748-3	Tierney and Tingley 2015	0.328	0.065	0.05	0.012	0.53	0.016	17.05	39.667	18.9	288
GeoB10749-3	Tierney and Tingley 2015	0.308	0.07	0.049	0.012	0.533	0.027	17.183	39.6	18.9	278
GeoB1501-1	Tierney and Tingley 2015	0.3144	0.0844	0.0815	0.0081	0.4764	0.0351	-32.012	-3.682	27.3	4258
GeoB1503-2	Tierney and Tingley 2015	0.3162	0.0822	0.0802	0.0082	0.4808	0.0323	-30.648	2.31	27.6	2298
GeoB1504-1	Tierney and Tingley 2015	0.3121	0.0806	0.0769	0.0082	0.4872	0.035	-31.287	2.288	27.5	2980
GeoB1506-1	Tierney and Tingley 2015	0.3076	0.0823	0.0772	0.0078	0.4888	0.0364	-35.182	2.205	27.6	4267
GeoB1515-2	Tierney and Tingley 2015	0.2972	0.0815	0.0797	0.0101	0.4949	0.0367	-43.665	4.238	27.6	3125
GeoB2022-3	Tierney and Tingley 2015	0.365	0.0852	0.0687	0.0081	0.4466	0.0263	-20.908	-34.435	18.6	4016
GeoB2102-1	Tierney and Tingley 2015	0.2721	0.0665	0.0771	0.0113	0.5377	0.0353	-41.2	-23.983	23.5	1805
GeoB2104-1	Tierney and Tingley 2015	0.2617	0.0694	0.0823	0.0114	0.5358	0.0394	-46.378	-27.29	23.7	1505
GeoB2105-3	Tierney and Tingley 2015	0.2664	0.0732	0.0655	0.0155	0.5539	0.0254	-46.738	-26.738	23.9	202
GeoB2106-1	Tierney and Tingley 2015	0.2959	0.0673	0.0659	0.0116	0.5305	0.0287	-46.497	-27.098	23.7	502
GeoB2107-5	Tierney and Tingley 2015	0.2723	0.0701	0.0783	0.0116	0.5336	0.034	-46.457	-27.18	23.7	1052
GeoB2108-1	Tierney and Tingley 2015	0.291	0.0743	0.0832	0.0112	0.5028	0.0375	-46.23	-27.487	23.7	1991
GeoB2110-1	Tierney and Tingley 2015	0.2828	0.0708	0.0856	0.0099	0.5122	0.0387	-45.522	-28.65	23.5	3003
GeoB2111-2	Tierney and Tingley 2015	0.2889	0.0728	0.0821	0.0091	0.5099	0.0373	-45.223	-29.112	22.8	3498
GeoB2112-1	Tierney and Tingley 2015	0.2884	0.0715	0.0768	0.0085	0.5167	0.038	-43.377	-29.135	22.1	4009
GeoB2124-1	Tierney and Tingley 2015	0.2759	0.0677	0.0842	0.0104	0.5269	0.0349	-39.56	-20.958	25.7	2003
GeoB2125-2	Tierney and Tingley 2015	0.275	0.0652	0.0749	0.0116	0.5395	0.0339	-39.857	-20.82	25.7	1542
GeoB2126-1	Tierney and Tingley 2015	0.2909	0.0713	0.0872	0.0114	0.5001	0.0391	-38.933	-21.27	25.5	2537
GeoB2130-1	Tierney and Tingley 2015	0.2993	0.0748	0.0931	0.0179	0.4775	0.0375	-37.103	-20.615	26	2113
GeoB2201-1	Tierney and Tingley 2015	0.2506	0.0651	0.086	0.0175	0.5453	0.0355	-34.463	-8.168	27.3	794
GeoB2202-5	Tierney and Tingley 2015	0.2394	0.0902	0.1557	0.017	0.4646	0.0331	-34.263	-8.197	27.3	1128
GeoB2205-4	Tierney and Tingley 2015	0.2596	0.073	0.0907	0.0098	0.5291	0.0378	-34.345	-8.573	27.3	1790
GeoB2206-1	Tierney and Tingley 2015	0.2633	0.0712	0.0948	0.0125	0.5182	0.0399	-34.48	-8.558	27.3	1442
GeoB2207-2	Tierney and Tingley 2015	0.2739	0.0812	0.0915	0.0084	0.5085	0.0365	-34.135	-8.735	27.3	2585
GeoB2208-1	Tierney and Tingley 2015	0.3274	0.082	0.0749	0.0062	0.4784	0.0311	-33.7	-8.917	27.3	3977
GeoB2212-1	Tierney and Tingley 2015	0.3427	0.0851	0.0742	0.006	0.4574	0.0346	-25.623	-4.032	26.7	5521
GeoB2213-1	Tierney and Tingley 2015	0.3134	0.0815	0.0733	0.0072	0.4908	0.0339	-24.153	-1.265	26.6	4323
GeoB2215-8	Tierney and Tingley 2015	0.3102	0.0802	0.0721	0.008	0.4944	0.035	-23.492	0.008	26.7	3712
GeoB2216-2	Tierney and Tingley 2015	0.2957	0.0806	0.0734	0.0076	0.5073	0.0353	-23.102	0	26.5	3914
GeoB2701-4	Tierney and Tingley 2015	0.4195	0.0191	0.0068	0.0027	0.5476	0.0043	-53.982	-37.207	16.5	1007
GeoB2703-7	Tierney and Tingley 2015	0.4874	0.0398	0.0176	0.0039	0.4446	0.0068	-54.202	-38.513	12.4	1162
GeoB2705-7	Tierney and Tingley 2015	0.4707	0.0557	0.0293	0.0046	0.4292	0.0106	-53.363	-39.243	14.6	4474
GeoB2706-6	Tierney and Tingley 2015	0.4808	0.0622	0.0283	0.0039	0.4142	0.0107	-55.535	-42.368	11.2	4700
GeoB2707-4	Tierney and Tingley 2015	0.499	0.0543	0.022	0.0032	0.414	0.0075	-56.323	-41.945	9.3	3167
GeoB2708-5	Tierney and Tingley 2015	0.4296	0.0198	0.0067	0.0026	0.5367	0.0045	-57.3	-41.418	9	392
GeoB2712-1	Tierney and Tingley 2015	0.5234	0.041	0.0151	0.0031	0.4127	0.0047	-59.33	-43.675	9.7	1228
GeoB2714-5	Tierney and Tingley 2015	0.4995	0.0566	0.0223	0.0032	0.4111	0.0073	-57.997	-43.863	9.9	2361
GeoB2715-1	Tierney and Tingley 2015	0.5117	0.0607	0.0291	0.0035	0.3875	0.0074	-57.662	-43.903	9.9	3280
GeoB2717-8	Tierney and Tingley 2015	0.4928	0.0606	0.0248	0.0032	0.4093	0.0094	-56.487	-47.162	8.7	4479
GeoB2718-1	Tierney and Tingley 2015	0.4872	0.0603	0.0261	0.0035	0.4151	0.0077	-58.175	-47.307	7.7	2990
GeoB2719-3	Tierney and Tingley 2015	0.5404	0.0342	0.011	0.003	0.4074	0.004	-60.093	-47.442	8.2	684
GeoB2722-2	Tierney and Tingley 2015	0.5004	0.0613	0.0291	0.0035	0.3992	0.0065	-58.62	-47.327	7.7	2351
GeoB2723-2	Tierney and Tingley 2015	0.5261	0.0325	0.0108	0.0031	0.4232	0.0044	-57.875	-48.912	7.3	569
GeoB2724-7	Tierney and Tingley 2015	0.4948	0.0636	0.0262	0.0032	0.4035	0.0087	-56.175	-47.963	8.7	4799
GeoB2727-1	Tierney and Tingley 2015	0.4921	0.0592	0.0243	0.0035	0.413	0.008	-56.538	-48.013	7	2803
GeoB2730-1	Tierney and Tingley 2015	0.4738	0.0557	0.0254	0.0035	0.4314	0.0102	-53.248	-44.475	12.4	5817
GeoB2731-1	Tierney and Tingley 2015	0.4615	0.0566	0.0267	0.004	0.4393	0.012	-51.423	-44.207	13.2	5691
GeoB2734-2	Tierney and Tingley 2015	0.4995	0.0472	0.0191	0.0032	0.4247	0.0063	-54.342	-39.29	11.3	2272
GeoB2802-2	Tierney and Tingley 2015	0.4961	0.0324	0.014	0.0034	0.4481	0.006	-55.015	-37.807	13.3	576
GeoB2803-1	Tierney and Tingley 2015	0.4737	0.0377	0.0183	0.0039	0.4586	0.0078	-53.703	-37.407	16.5	1162
GeoB2804-2	Tierney and Tingley 2015	0.4645	0.0421	0.0229	0.0042	0.4577	0.0087	-53.537	-37.537	16.5	1836
GeoB2805-1	Tierney and Tingley 2015	0.4531	0.0447	0.0249	0.0043	0.4629	0.0101	-53.443	-37.605	16.5	2743
GeoB2806-6	Tierney and Tingley 2015	0.4456	0.0491	0.0308	0.0052	0.4567	0.0126	-53.137	-37.832	16.5	3542
GeoB2809-2	Tierney and Tingley 2015	0.4045	0.0532	0.0395	0.0061	0.4803	0.0163	-51.522	-36.332	19.6	3539
GeoB2810-2	Tierney and Tingley 2015	0.3929	0.0493	0.0382	0.0065	0.4964	0.0166	-51.978	-35.98	19.7	2909
GeoB2811-1	Tierney and Tingley 2015	0.4131	0.0395	0.0261	0.0052	0.5033	0.0128	-52.27	-35.753	17.1	1789
GeoB2812-3	Tierney and Tingley 2015	0.4058	0.0261	0.0137	0.0038	0.5438	0.0069	-52.387	-35.602	17.1	1041
GeoB2813-1	Tierney and Tingley 2015	0.4318	0.0238	0.011	0.0037	0.5242	0.0056	-52.562	-35.532	17.1	508
GeoB2817-3	Tierney and Tingley 2015	0.3201	0.0763	0.0744	0.0077	0.4886	0.0329	-40.97	-31.902	20.6	3959
GeoB2818-1	Tierney and Tingley 2015	0.314	0.077	0.078	0.008	0.4916	0.0314	-38.17	-30.873	22	3110
GeoB2819-2	Tierney and Tingley 2015	0.3167	0.0783	0.0765	0.0089	0.4847	0.0349	-38.343	-30.848	22	3435
GeoB2820-1	Tierney and Tingley 2015	0.3145	0.0813	0.0815	0.0078	0.4836	0.0312	-38.438	-30.822	22	3606
GeoB2821-2	Tierney and Tingley 2015	0.3173	0.0785	0.0759	0.0079	0.4876	0.0328	-38.817	-30.453	22	3936
GeoB2824-1	Tierney and Tingley 2015	0.3785	0.0674	0.0502	0.0068	0.4759	0.0212	-42.498	-33.498	20.4	4512
GeoB2825-3	Tierney and Tingley 2015	0.3717	0.0665	0.0514	0.0071	0.4784	0.0249	-41.432	-32.5	20.2	4352
GeoB2826-1	Tierney and Tingley 2015	0.3309	0.0693	0.0657	0.0081	0.4953	0.0307	-38.073	-30.915	22	2943
GeoB2827-2	Tierney and Tingley 2015	0.3176	0.0737	0.0723	0.0078	0.494	0.0346	-40.728	-31.478	20.6	3702
GeoB2828-1	Tierney and Tingley 2015	0.3088	0.075	0.0745	0.0079	0.5013	0.0325	-40.718	-31.475	20.6	3741
GeoB2829-3	Tierney and Tingley 2015	0.3037	0.0736	0.0781	0.0087	0.5005	0.0354	-43.43	-30.873	21	3523
GeoB2830-1	Tierney and Tingley 2015	0.2946	0.0728	0.0808	0.0081	0.5072	0.0364	-44	-29.02	21.9	3815
GeoB6402-9	Tierney and Tingley 2015	0.4372	0.0705	0.0388	0.0065	0.4328	0.0142	-22.757	-39.743	14.1	3878
GeoB6404-3	Tierney and Tingley 2015	0.4527	0.0684	0.0332	0.0047	0.4286	0.0123	-23.465	-41.506	13	4223
GeoB6405-8	Tierney and Tingley 2015	0.4499	0.0674	0.0338	0.0051	0.429	0.0148	-21.853	-42	13.6	3863
GeoB6406-1	Tierney and Tingley 2015	0.4576	0.0699	0.0346	0.005	0.4212	0.0117	-20.784	-42	11.3	3514
GeoB6407-2	Tierney and Tingley 2015	0.471	0.0684	0.0312	0.0043	0.4148	0.0103	-19.5	-42.045	11.5	3384
GeoB6408-3	Tierney and Tingley 2015	0.4704	0.0667	0.0294	0.0042	0.4186	0.0106	-20.441	-43.614	10.5	3797
GeoB6409-2	Tierney and Tingley 2015	0.5015	0.0642	0.0262	0.0034	0.3966	0.0081	-21.717	-44.507	9.6	4296
GeoB6409-3	Tierney and Tingley 2015	0.4709	0.0599	0.0316	0.0054	0.4166	0.0156	-21.717	-44.507	9.6	4296
GeoB6410-1	Tierney and Tingley 2015	0.4789	0.0648	0.0274	0.0034	0.4164	0.0091	-20.9	-44.517	9.8	4038
GeoB6412-1	Tierney and Tingley 2015	0.4968	0.057	0.0255	0.004	0.408	0.0087	-17.647	-44.254	9.4	3475
GeoB6413-4	Tierney and Tingley 2015	0.4786	0.0627	0.0271	0.0038	0.4189	0.009	-17.34	-44.207	9.4	3768
GeoB6414-1	Tierney and Tingley 2015	0.4871	0.0637	0.0288	0.0037	0.4077	0.0092	-13.07	-43.999	11	3830
GeoB6416-2	Tierney and Tingley 2015	0.4519	0.0693	0.0381	0.0059	0.4209	0.0138	-18.163	-39.955	13.4	3525
GeoB6417-2	Tierney and Tingley 2015	0.4224	0.0719	0.0401	0.0063	0.4443	0.015	-21.042	-39.093	14.2	4024
GeoB6418-3	Tierney and Tingley 2015	0.4194	0.0723	0.0417	0.0068	0.443	0.0169	-21.535	-38.427	13.3	4126
GeoB6419-1	Tierney and Tingley 2015	0.4392	0.0685	0.0436	0.009	0.4231	0.0166	-21.864	-37.774	18.5	3568
GeoB6420-2	Tierney and Tingley 2015	0.3929	0.0761	0.0488	0.0072	0.4567	0.0182	-22.148	-37.158	17.5	3998
GeoB6421-1	Tierney and Tingley 2015	0.3914	0.0745	0.0493	0.0083	0.4551	0.0214	-22.445	-36.448	16.4	4216
GeoB6422-5	Tierney and Tingley 2015	0.3763	0.0795	0.0581	0.0088	0.4554	0.0218	-22.733	-35.707	18.6	3972
GeoB6423-1	Tierney and Tingley 2015	0.3667	0.0766	0.057	0.009	0.4665	0.0241	-22.992	-35.253	18.6	3963
GeoB6424-2	Tierney and Tingley 2015	0.3562	0.077	0.0589	0.009	0.4729	0.0259	-23.276	-34.608	18.2	3820
GeoB6425-1	Tierney and Tingley 2015	0.3454	0.0798	0.0652	0.0086	0.4724	0.0286	-23.588	-33.825	19.7	4352
GeoB6426-2	Tierney and Tingley 2015	0.3397	0.0777	0.0655	0.0074	0.4826	0.0271	-24.024	-33.499	20	4381
GeoB6427-1	Tierney and Tingley 2015	0.3413	0.0762	0.0674	0.0072	0.4804	0.0274	-24.248	-33.182	20	4491
GeoB6428-3	Tierney and Tingley 2015	0.3272	0.0776	0.0693	0.0075	0.4883	0.0301	-24.248	-32.51	20.5	4022
GeoB6429-1	Tierney and Tingley 2015	0.2985	0.0751	0.0714	0.0113	0.5087	0.0351	-24.248	-31.95	21.4	4335
GeoB8301-5	Tierney and Tingley 2015	0.5178	0.0769	0.0496	0.0077	0.3303	0.0177	17.699	-34.775	17.9	1941
GeoB8303-5	Tierney and Tingley 2015	0.4635	0.0758	0.0502	0.0072	0.386	0.0173	16.785	-34.261	18.4	3447
GeoB8305-1	Tierney and Tingley 2015	0.4954	0.0649	0.0382	0.0068	0.3808	0.0138	17.177	-33.478	16	712
GeoB8306-1	Tierney and Tingley 2015	0.4806	0.0709	0.045	0.0071	0.381	0.0154	16.843	-33.741	18.1	1924
GeoB8307-5	Tierney and Tingley 2015	0.4551	0.0748	0.0494	0.0076	0.3951	0.0181	16.5	-33.834	18.1	2668
GeoB8308-2	Tierney and Tingley 2015	0.4523	0.078	0.053	0.0078	0.3906	0.0184	16.268	-33.92	18.1	3162
GeoB8310-1	Tierney and Tingley 2015	0.5038	0.0694	0.0417	0.007	0.3616	0.0165	16.382	-32.909	17.1	1995
GeoB8311-1	Tierney and Tingley 2015	0.492	0.0705	0.0454	0.0073	0.3674	0.0174	16.31	-32.365	17.1	2535
GeoB8313-1	Tierney and Tingley 2015	0.489	0.0726	0.0439	0.0073	0.3714	0.0157	15.944	-32.123	18.1	1090
GeoB8314-1	Tierney and Tingley 2015	0.496	0.0763	0.0457	0.0075	0.3585	0.016	15.813	-32.499	18.1	1977
GeoB8315-5	Tierney and Tingley 2015	0.463	0.0748	0.0507	0.0074	0.386	0.0181	15.695	-32.888	18.1	2996
GeoB8316-1	Tierney and Tingley 2015	0.4617	0.0768	0.0512	0.0074	0.3849	0.018	15.734	-32.74	18.1	2667
GeoB8317-1	Tierney and Tingley 2015	0.4508	0.0787	0.054	0.008	0.3891	0.0193	15.163	-32.329	18.1	2930
GeoB8318-1	Tierney and Tingley 2015	0.5819	0.0569	0.0244	0.0064	0.3203	0.0101	16.805	-32.152	17.1	307
GeoB8319-1	Tierney and Tingley 2015	0.5377	0.0359	0.015	0.0043	0.4024	0.0047	18.078	-32.496	14.9	69
GeoB8321-1	Tierney and Tingley 2015	0.5166	0.0393	0.0166	0.0045	0.4168	0.0062	18.117	-31.864	14.8	104
GeoB8322-1	Tierney and Tingley 2015	0.5209	0.0397	0.0165	0.0045	0.4129	0.0055	18.118	-31.954	14.8	105
GeoB8323-1	Tierney and Tingley 2015	0.5214	0.0378	0.0162	0.0046	0.4146	0.0055	18.222	-32.032	14.9	90
GeoB8324-1	Tierney and Tingley 2015	0.5263	0.04	0.0168	0.0048	0.406	0.0061	18.091	-31.747	14.8	100
GeoB8325-1	Tierney and Tingley 2015	0.5753	0.044	0.0186	0.0044	0.3512	0.0066	17.279	-30.595	15.7	134
GeoB8327-1	Tierney and Tingley 2015	0.5359	0.0411	0.0185	0.0049	0.3932	0.0063	17.007	-29.703	13.7	88
GeoB8328-1	Tierney and Tingley 2015	0.5259	0.0407	0.0177	0.0048	0.405	0.0059	17.058	-29.939	13.7	112
GeoB8329-1	Tierney and Tingley 2015	0.525	0.0403	0.0181	0.0049	0.4058	0.006	17.034	-29.928	13.7	111
GeoB8332-3	Tierney and Tingley 2015	0.5453	0.0395	0.0181	0.0052	0.3862	0.0058	16.66	-29.127	13.7	117
GeoB8333-1	Tierney and Tingley 2015	0.5575	0.0417	0.0182	0.0051	0.3713	0.0062	16.615	-29.122	13.7	20
GeoB8336-5	Tierney and Tingley 2015	0.4428	0.0903	0.06	0.0067	0.381	0.0192	12.344	-29.21	18.4	3626
GeoB8337-5	Tierney and Tingley 2015	0.4499	0.0844	0.0572	0.0069	0.3833	0.0183	13.178	-29.408	18	3079
GeoB8338-1	Tierney and Tingley 2015	0.4964	0.0737	0.042	0.0061	0.3665	0.0153	14.322	-29.5	17.2	915
GeoB8340-1	Tierney and Tingley 2015	0.4507	0.0713	0.042	0.0073	0.4137	0.015	14.825	-30.317	17.8	600
GeoB8342-5	Tierney and Tingley 2015	0.4297	0.0832	0.0607	0.0082	0.397	0.0212	13.001	-31.501	18.2	3521
GeoB8343-1	Tierney and Tingley 2015	0.4232	0.0835	0.0577	0.0079	0.4071	0.0206	13.325	-30.849	18.3	3089
GeoB9501-4	Tierney and Tingley 2015	0.3176	0.0607	0.0439	0.0161	0.5458	0.016	-16.733	16.843	23.5	330
GeoB9506-3	Tierney and Tingley 2015	0.3451	0.0751	0.0692	0.0088	0.4698	0.0321	-18.35	15.61	24.1	2964
GeoB9508-4	Tierney and Tingley 2015	0.3368	0.0779	0.0718	0.0091	0.4736	0.0308	-17.948	15.498	23.4	2385
GeoB9510-3	Tierney and Tingley 2015	0.3357	0.0793	0.0685	0.0101	0.477	0.0293	-17.653	15.417	23.4	1567
GeoB9512-4	Tierney and Tingley 2015	0.3142	0.0702	0.0583	0.0124	0.5157	0.0291	-17.485	15.376	23.4	787
GeoB9513-5	Tierney and Tingley 2015	0.3251	0.0702	0.0576	0.014	0.5073	0.0258	-17.294	15.318	23.4	498
GeoB9520-4	Tierney and Tingley 2015	0.3135	0.0754	0.0637	0.011	0.5069	0.0294	-17.591	13.829	24.2	1102
GeoB9521-3	Tierney and Tingley 2015	0.3131	0.0684	0.0579	0.0144	0.5216	0.0246	-17.49	13.849	24.2	522
GeoB9525-5	Tierney and Tingley 2015	0.3329	0.0805	0.0738	0.0111	0.4726	0.0291	-17.88	12.64	24.8	2648
GeoB9526-4	Tierney and Tingley 2015	0.3381	0.0776	0.0738	0.0099	0.4704	0.0302	-18.056	12.435	25.3	3223
GeoB9528-1	Tierney and Tingley 2015	0.3225	0.0798	0.0785	0.0074	0.4752	0.0366	-17.664	9.166	27	3053
GeoB9529-1	Tierney and Tingley 2015	0.3296	0.0797	0.0796	0.0085	0.4682	0.0344	-17.369	8.352	27.4	1234
GeoB9534-4	Tierney and Tingley 2015	0.2958	0.0721	0.072	0.0135	0.5176	0.0289	-14.936	8.901	27.3	493
GeoB9535-5	Tierney and Tingley 2015	0.3009	0.0741	0.0743	0.0124	0.5081	0.0302	-14.961	8.876	27.3	666
Gullmarsfjord	Tierney and Tingley 2015	0.4317	0.0237	0.0086	0.0037	0.5291	0.0032	11.5	58.333	9.1	110
HB-4	Tierney and Tingley 2015	0.5356	0.0273	0.0113	0.0038	0.4192	0.0028	-87.712	60.621	6.3	205
HB-5	Tierney and Tingley 2015	0.4967	0.0204	0.0049	0.0025	0.4724	0.003	-90.712	60.621	5.3	128
HB-6	Tierney and Tingley 2015	0.5002	0.0145	0.0045	0.0026	0.4763	0.0019	-91.712	60.621	6.8	120
HON02-015 BEN	Tierney and Tingley 2015	0.4966	0.0389	0.0141	0.0031	0.4427	0.0046	-63.712	49.621	5.5	395
HQ08-48PC	Tierney and Tingley 2015	0.2286	0.0575	0.0696	0.01	0.592	0.0424	110.53	16.96	27	1474
IK9330-5	Tierney and Tingley 2015	0.485	0.0217	0.0062	0.0045	0.4782	0.0043	127.503	74	3.3	27
IK9342-6	Tierney and Tingley 2015	0.5001	0.0218	0.0057	0.0042	0.4641	0.0041	127.348	74.51	3.3	34
IK9356-2	Tierney and Tingley 2015	0.4491	0.018	0.0052	0.0044	0.5183	0.0049	123.015	74.9967	3.2	33
IS-S1	Tierney and Tingley 2015	0.3757	0.0686	0.0575	0.0089	0.4677	0.0216	-9.852	48.062	13.4	2006
IS-S2	Tierney and Tingley 2015	0.3909	0.0662	0.0486	0.0098	0.4662	0.0184	-9.707	48.178	13.4	1035
IS-S3	Tierney and Tingley 2015	0.4116	0.0678	0.0427	0.0106	0.4525	0.0147	-9.709	48.267	13.4	497
IS-S4	Tierney and Tingley 2015	0.4635	0.0373	0.0127	0.0049	0.4779	0.0037	-6.099	51.218	11.9	106
IS-S5	Tierney and Tingley 2015	0.4588	0.0345	0.0103	0.0038	0.4891	0.0036	-5.593	53.883	10.8	104
IS-S6	Tierney and Tingley 2015	0.4886	0.0279	0.0087	0.0037	0.4686	0.0025	-5.584	54.119	10.8	54
KH01-3 St. 01	Tierney and Tingley 2015	0.384	0.059	0.047	0.004	0.494	0.013	-160	0	27.6	5142
KH01-3 St. 08	Tierney and Tingley 2015	0.388	0.056	0.043	0.003	0.494	0.015	-160	-35	17.6	5098
KH01-3 St. 10	Tierney and Tingley 2015	0.251	0.051	0.063	0.006	0.586	0.042	-160	-47	11.1	5118
KH01-3 St. 17	Tierney and Tingley 2015	0.365	0.058	0.051	0.003	0.498	0.024	140	-60	0.9	4483
KH01-3 St. 19	Tierney and Tingley 2015	0.34	0.063	0.059	0.007	0.506	0.026	140	-50	7.7	3755
KH03-1 HY03	Tierney and Tingley 2015	0.345	0.067	0.063	0.006	0.49	0.031	-94.95	8.0333	27.7	3661
KH03-1 HY04	Tierney and Tingley 2015	0.34	0.062	0.061	0.005	0.503	0.029	-95.05	4.0333	27.5	3563
KH03-1 HY05	Tierney and Tingley 2015	0.224	0.06	0.066	0.007	0.598	0.045	-95.5	2.0167	26.3	2886
KH03-1 HY06	Tierney and Tingley 2015	0.342	0.066	0.059	0.006	0.499	0.029	-95.4333	0.0167	23.8	3246
KH03-1 HY07	Tierney and Tingley 2015	0.359	0.068	0.062	0.004	0.48	0.026	-95	-2.0333	23	3331
KH03-1 HY08	Tierney and Tingley 2015	0.369	0.062	0.055	0.006	0.482	0.027	-95	-3.9667	24.2	3657
KH03-1 HY08B	Tierney and Tingley 2015	0.344	0.071	0.069	0.004	0.481	0.032	-94.9167	-5.95	24.4	3852
KH03-1 HY09	Tierney and Tingley 2015	0.23	0.045	0.067	0.007	0.603	0.047	-95.0167	-7.9833	24.3	3910
KH04-5 SX02	Tierney and Tingley 2015	0.548	0.041	0.012	0.002	0.392	0.005	157.517	-0.6667	29.3	2098
KH04-5 SX09	Tierney and Tingley 2015	0.543	0.031	0.009	0.002	0.41	0.005	174.2	-65.15	-0.2	3393
KH04-5 SX10	Tierney and Tingley 2015	0.54	0.042	0.014	0.002	0.396	0.007	-172.65	-67.2167	0.2	3884
KH04-5 SX14	Tierney and Tingley 2015	0.432	0.046	0.025	0.003	0.484	0.011	-170	-50.0167	9.8	5388
KH04-5 SX15	Tierney and Tingley 2015	0.452	0.049	0.025	0.002	0.462	0.009	-170	-45	12.6	5165
KH04-5 SX16	Tierney and Tingley 2015	0.426	0.053	0.028	0.003	0.479	0.011	-171	-43.1833	14.1	2313
KH04-5 SX17	Tierney and Tingley 2015	0.419	0.055	0.033	0.003	0.479	0.011	-170	-40	15.5	4635
LMG0404-3	Tierney and Tingley 2015	0.4576	0.0125	0.0041	0.0029	0.5203	0.0026	-55.313	-63.136	-1.1	758
LMG0502-25	Tierney and Tingley 2015	0.5037	0.0126	0.0036	0.0022	0.4754	0.0025	-60.383	-64.797	-1.3	861
LMG9802-6	Tierney and Tingley 2015	0.5221	0.0248	0.0067	0.0019	0.4411	0.0034	-66.884	-67.216	-0.8	650
M2003-01	Tierney and Tingley 2015	0.5262	0.0368	0.013	0.0039	0.4145	0.0056	-1.966	62.001	8.6	1602
M2003-06	Tierney and Tingley 2015	0.5312	0.0328	0.0107	0.0035	0.4165	0.0052	29.553	74.146	3.8	366
M2003-08	Tierney and Tingley 2015	0.5303	0.0337	0.0109	0.0036	0.4167	0.0048	-1.125	62.767	8.6	1601
MC-1	Tierney and Tingley 2015	0.4821	0.0394	0.0176	0.0041	0.4511	0.0056	141.546	41.3	12.1	1002
MC-3	Tierney and Tingley 2015	0.5328	0.0367	0.0108	0.0039	0.4104	0.0053	138.597	41.251	12.8	1268
MC3K	Tierney and Tingley 2015	0.2393	0.0721	0.0885	0.0128	0.5367	0.0506	-90.3	27.5	25.4	1100
MC4R	Tierney and Tingley 2015	0.2369	0.0699	0.0854	0.012	0.5491	0.0468	-90.3	27.5	25.4	1100
MC4S	Tierney and Tingley 2015	0.2264	0.0747	0.0959	0.0125	0.537	0.0534	-90.3	27.5	25.4	1100
MC-6	Tierney and Tingley 2015	0.5283	0.0365	0.0133	0.0051	0.4123	0.0045	139.211	39.32	15.5	856
MD03-2601	Tierney and Tingley 2015	0.5824	0.0179	0.006	0.0034	0.3882	0.0021	138.557	-66.051	-0.4	750
MD03-2603	Tierney and Tingley 2015	0.5319	0.0361	0.0116	0.0027	0.411	0.0068	139.375	-64.285	-0.2	3331
MD03-2604	Tierney and Tingley 2015	0.565	0.0373	0.0123	0.0025	0.376	0.0068	139.375	-64.285	-0.2	3331
MD05-2894	Tierney and Tingley 2015	0.1637	0.0535	0.0787	0.0142	0.6414	0.0485	111.55	7.04	28.2	1982
MD05-2896	Tierney and Tingley 2015	0.2178	0.0587	0.0804	0.0098	0.5938	0.0395	111.441	8.825	28.5	1657
MD05-2898	Tierney and Tingley 2015	0.2218	0.0617	0.0802	0.0115	0.5795	0.0453	112.18	13.79	27.7	2395
MD05-2900	Tierney and Tingley 2015	0.2101	0.0603	0.0768	0.0116	0.5949	0.0464	110.7	14.39	27.1	1455
MD05-2902	Tierney and Tingley 2015	0.1999	0.0616	0.0812	0.0109	0.5964	0.0501	114.96	17.96	27.3	3697
MD05-2903	Tierney and Tingley 2015	0.217	0.0631	0.0781	0.0121	0.5811	0.0487	116.25	19.46	26.6	2066
MD05-2905	Tierney and Tingley 2015	0.2086	0.0621	0.0772	0.0124	0.5913	0.0484	117.36	20.14	26.4	1647
Mokbaai	Tierney and Tingley 2015	0.5122	0.0476	0.0209	0.0099	0.4059	0.0036	4.083	53	10.6	5
MW91-9 BC-22	Tierney and Tingley 2015	0.226	0.0658	0.0848	0.013	0.5469	0.0635	160.4	0	29.5	2965
MW91-9 BC-37	Tierney and Tingley 2015	0.2251	0.066	0.0816	0.0125	0.5547	0.06	157.8	-0.98	29.3	2022
MW91-9 BC-51	Tierney and Tingley 2015	0.2314	0.0633	0.082	0.0125	0.5509	0.06	161	0	29.5	3397
MW91-9 BC-58	Tierney and Tingley 2015	0.2393	0.0656	0.0806	0.0119	0.5432	0.0593	162.2	0	29.5	4329
MW91-9 BC-74	Tierney and Tingley 2015	0.2276	0.0662	0.0809	0.0116	0.5541	0.0596	162.6	0	29.5	4445
MW91-9 GGC-12	Tierney and Tingley 2015	0.2398	0.0678	0.084	0.0125	0.5334	0.0626	157.9	-1	29.3	2018
MW91-9 GGC-15	Tierney and Tingley 2015	0.2441	0.0681	0.0826	0.0128	0.5326	0.0598	158.9	0	29.3	2311
MW91-9 GGC-18	Tierney and Tingley 2015	0.2341	0.0653	0.0844	0.013	0.5413	0.0619	160.5	0	29.5	2980
MW91-9 GGC-29	Tierney and Tingley 2015	0.2248	0.0656	0.0802	0.012	0.5547	0.0627	158.9	0	29.3	2322
MW91-9 GGC-38	Tierney and Tingley 2015	0.2802	0.0634	0.0791	0.0123	0.5097	0.0553	159.4	0	29.4	2456
MW91-9 GGC-44	Tierney and Tingley 2015	0.2411	0.0633	0.0804	0.0121	0.5427	0.0604	160.6	0	29.5	3160
MW91-9 GGC-55	Tierney and Tingley 2015	0.2348	0.0652	0.077	0.0117	0.5485	0.0627	161.8	0	29.6	4025
MW91-9 GGC-6	Tierney and Tingley 2015	0.2508	0.0671	0.0871	0.0117	0.5258	0.0576	156.99	-2.3	29.3	1618
MW91-9 GGC-68	Tierney and Tingley 2015	0.2557	0.0638	0.076	0.0115	0.5319	0.0611	162.7	0	29.5	4449
MW91-9 GGC-8	Tierney and Tingley 2015	0.2441	0.0678	0.0861	0.0125	0.533	0.0564	156.9	-2.2	29.3	1625
NBP0003-1	Tierney and Tingley 2015	0.5002	0.0137	0.0038	0.002	0.4774	0.0028	-58.578	-64.294	-1.3	768
NBP0003-28	Tierney and Tingley 2015	0.4931	0.0146	0.0044	0.0021	0.4821	0.0037	-58.516	-64.367	-1.3	794
NBP0003-29	Tierney and Tingley 2015	0.502	0.0131	0.0037	0.002	0.4784	0.0008	-58.444	-64.356	-1.3	690
NBP0003-30	Tierney and Tingley 2015	0.5082	0.0122	0.0034	0.002	0.4719	0.0023	-58.45	-64.281	-1.3	843
NBP0107 JPC33	Tierney and Tingley 2015	0.541	0.0234	0.0068	0.0024	0.4237	0.0027	-61.491	-63.135	0	704
NBP0107-17	Tierney and Tingley 2015	0.4461	0.0237	0.0067	0.0023	0.5167	0.0045	-65.401	-64.849	-0.2	657
NBP0107-28	Tierney and Tingley 2015	0.5435	0.017	0.0047	0.0021	0.4302	0.0025	-62.046	-64.317	0.4	1014
NBP0107-49	Tierney and Tingley 2015	0.4704	0.0121	0.0041	0.0026	0.5081	0.0027	-56.382	-63.667	-1.3	638
NBP0603-3	Tierney and Tingley 2015	0.5173	0.0162	0.0042	0.0017	0.4579	0.0028	-61.565	-65.768	-1.3	772
NBP0702-10	Tierney and Tingley 2015	0.5208	0.015	0.004	0.0018	0.4555	0.0029	-108.61	-74.1	-1.7	730
NBP0702-13	Tierney and Tingley 2015	0.5152	0.0206	0.0057	0.003	0.4527	0.0029	-134.52	-73.94	-1.8	470
NBP0702-15	Tierney and Tingley 2015	0.5056	0.0232	0.0064	0.0027	0.459	0.0032	-125.81	-72.56	-1.6	425
NBP0702-17	Tierney and Tingley 2015	0.531	0.0204	0.0056	0.0021	0.4378	0.0031	-114.99	-71.54	-1.8	424
NBP0702-20	Tierney and Tingley 2015	0.5164	0.0328	0.0097	0.0027	0.4341	0.0043	-106.01	-71.13	-1.8	512
NBP0702-22	Tierney and Tingley 2015	0.4778	0.0345	0.0113	0.003	0.4683	0.005	-104.01	-71.75	-1.8	665
NBP0702-3	Tierney and Tingley 2015	0.5414	0.0219	0.0068	0.0024	0.4248	0.0026	-158.27	-77.47	-0.9	1081
NBP9507-2	Tierney and Tingley 2015	0.4367	0.013	0.0038	0.0017	0.542	0.0027	-57.494	-62.208	-0.5	300
NBP9903-20	Tierney and Tingley 2015	0.4943	0.0148	0.0047	0.0024	0.4811	0.0028	-62.916	-64.844	-0.2	301
NBP9903-21	Tierney and Tingley 2015	0.5227	0.0161	0.005	0.0025	0.4512	0.0025	-62.976	-64.844	-0.2	282
NIOP 325	Tierney and Tingley 2015	0.2791	0.0729	0.0924	0.0108	0.4953	0.0495	53.55	10.683	26.6	4065
NIOP 902	Tierney and Tingley 2015	0.2249	0.062	0.0614	0.0165	0.5924	0.0428	51.577	10.779	26.1	459
NIOP 903	Tierney and Tingley 2015	0.2229	0.0675	0.0794	0.0166	0.5636	0.0501	51.658	10.783	26.1	789
NIOP 904	Tierney and Tingley 2015	0.2319	0.0693	0.0761	0.0138	0.5611	0.0477	51.771	10.788	26.1	1194
NIOP 905	Tierney and Tingley 2015	0.2466	0.0682	0.0852	0.0155	0.5313	0.0531	51.944	10.916	26.1	1567
NIOP 906	Tierney and Tingley 2015	0.2443	0.0636	0.077	0.012	0.5429	0.0601	52.129	10.812	26.1	2020
NIOP 907	Tierney and Tingley 2015	0.2607	0.0649	0.0798	0.0128	0.5285	0.0533	52.249	10.804	26.1	2807
NIOP 908	Tierney and Tingley 2015	0.2863	0.0715	0.0842	0.0127	0.4941	0.0513	52.915	10.778	26.1	3572
NIOP 915	Tierney and Tingley 2015	0.2824	0.0717	0.0879	0.0121	0.4919	0.0541	53.524	10.69	26.6	4035
NIOP 922	Tierney and Tingley 2015	0.1955	0.0599	0.072	0.0139	0.5988	0.0599	52.53	16.17	26.6	201
North Frisian Front	Tierney and Tingley 2015	0.5059	0.0345	0.0131	0.0048	0.4381	0.0036	4.5	54	10.6	42
North Sea Breeveertien 14	Tierney and Tingley 2015	0.4563	0.0532	0.0188	0.0071	0.4605	0.0041	3.733	52.908	11.3	-999
North Sea Central Southern Bight	Tierney and Tingley 2015	0.4572	0.0445	0.0196	0.0071	0.4676	0.0041	3	53	10.3	40
North Sea Dutch Coast	Tierney and Tingley 2015	0.4792	0.0495	0.0167	0.0057	0.4436	0.0051	4.5	53	11	24
NP-07-13-30	Tierney and Tingley 2015	0.5182	0.0161	0.0053	0.003	0.455	0.0023	16.714	-29.136	13.7	88
NP-07-13-49	Tierney and Tingley 2015	0.4763	0.0124	0.0045	0.003	0.5017	0.0021	-55.823	-63.071	-0.7	743
OCE205	Tierney and Tingley 2015	0.1854	0.0667	0.0771	0.0376	0.6004	0.0328	-77.7	26.2	26.4	-999
OCE437-7 MC11A	Tierney and Tingley 2015	0.307	0.0673	0.0593	0.0132	0.5256	0.0277	-9.0653	36.3901	18.1	596
OCE437-7 MC12C	Tierney and Tingley 2015	0.2896	0.0697	0.0772	0.0115	0.5157	0.0362	-7.5315	35.8903	19.2	1184
OCE437-7 MC15G	Tierney and Tingley 2015	0.296	0.067	0.059	0.0139	0.5362	0.0279	-7.7643	34.115	19.5	388
OCE437-7 MC18C	Tierney and Tingley 2015	0.2766	0.073	0.0808	0.0115	0.5211	0.0369	-9.3165	33.4485	19.5	835
OCE437-7 MC1A	Tierney and Tingley 2015	0.2826	0.0682	0.0747	0.0105	0.5272	0.0367	-9.5128	37.8278	17.3	1123
OCE437-7 MC22C	Tierney and Tingley 2015	0.3345	0.0648	0.0555	0.01	0.5068	0.0283	-10.2829	30.8603	17.6	835
OCE437-7 MC25C	Tierney and Tingley 2015	0.316	0.0654	0.0621	0.0095	0.5159	0.0311	-10.6317	30.8882	17.6	1244
OCE437-7 MC28D	Tierney and Tingley 2015	0.276	0.0711	0.0771	0.0091	0.5272	0.0395	-12.4669	29.0181	19.5	776
OCE437-7 MC31A	Tierney and Tingley 2015	0.3288	0.066	0.0639	0.0095	0.5003	0.0314	-13.7408	27.5371	19.7	1029
OCE437-7 MC36F	Tierney and Tingley 2015	0.2893	0.0723	0.0823	0.0086	0.5076	0.0399	-15.1201	26.8273	20.3	2812
OCE437-7 MC39E	Tierney and Tingley 2015	0.2982	0.0762	0.077	0.0084	0.5024	0.0379	-16.4069	25.4993	20.2	1780
OCE437-7 MC42A	Tierney and Tingley 2015	0.3084	0.0724	0.0697	0.0085	0.5036	0.0374	-16.6571	25.0203	20.2	1401
OCE437-7 MC44B	Tierney and Tingley 2015	0.3149	0.073	0.0723	0.0078	0.4955	0.0366	-17.0478	24.3686	20.8	1662
OCE437-7 MC4E	Tierney and Tingley 2015	0.2778	0.0654	0.076	0.0091	0.5311	0.0407	-10.184	37.8372	17.9	3146
OCE437-7 MC50B	Tierney and Tingley 2015	0.3181	0.0717	0.0687	0.0077	0.4975	0.0363	-17.8542	23.2071	19.3	2295
OCE437-7 MC51B	Tierney and Tingley 2015	0.3278	0.0682	0.0565	0.0084	0.5055	0.0335	-17.8708	21.797	18.4	1276
OCE437-7 MC55B	Tierney and Tingley 2015	0.3331	0.0643	0.0504	0.0094	0.5123	0.0304	-17.8028	21.2393	18.4	798
OCE437-7 MC63E	Tierney and Tingley 2015	0.3426	0.0701	0.0614	0.0093	0.4837	0.0329	-18.5512	20.7463	20.2	2106
OCE437-7 MC65H	Tierney and Tingley 2015	0.3315	0.0699	0.0565	0.0101	0.4994	0.0325	-17.8607	19.9434	20.1	1455
OCE437-7 MC67D	Tierney and Tingley 2015	0.3279	0.0721	0.0593	0.0095	0.4982	0.0329	-17.2767	19.3567	20.1	1393
OCE437-7 MC69A	Tierney and Tingley 2015	0.3401	0.0727	0.0639	0.0097	0.48	0.0336	-17.3348	18.6388	22.2	2282
OCE437-7 MC78F	Tierney and Tingley 2015	0.2814	0.0726	0.0794	0.0103	0.5158	0.0405	-23.4132	15.31	24.2	944
OCE437-7 MC7B	Tierney and Tingley 2015	0.2878	0.063	0.0749	0.0098	0.526	0.0384	-9.8672	36.7722	18.1	2735
OMEX 98-5	Tierney and Tingley 2015	0.3804	0.0671	0.0484	0.0114	0.4737	0.019	9.29	41.38	17.8	765
OMEX 99-15	Tierney and Tingley 2015	0.4117	0.0592	0.0357	0.0102	0.4663	0.0168	9.37	39.35	18.4	-999
Oyster grounds	Tierney and Tingley 2015	0.5028	0.0331	0.0123	0.0049	0.4438	0.0032	4.5	54.5	10.6	47
PD90-7-21	Tierney and Tingley 2015	0.5256	0.0161	0.0057	0.0025	0.4474	0.0026	-62.599	-64.907	-0.2	240
PD90-7-6	Tierney and Tingley 2015	0.5165	0.0192	0.0061	0.0025	0.4524	0.0033	-63.191	-65.121	-0.2	171
PD90-7-8	Tierney and Tingley 2015	0.5426	0.0207	0.0062	0.0024	0.4246	0.0035	-63.22	-65.155	-0.2	493
PD90-7-9	Tierney and Tingley 2015	0.5472	0.0195	0.006	0.0023	0.4226	0.0025	-63.228	-65.166	-0.2	490
Peru Margin PM1	Tierney and Tingley 2015	0.3144	0.0481	0.0326	0.0102	0.5806	0.014	-77.317	-11.983	18.5	100
Peru Margin PM7	Tierney and Tingley 2015	0.2854	0.0516	0.0496	0.0133	0.5812	0.0189	-78.067	-11.05	19.9	250
PLS-91-1-17	Tierney and Tingley 2015	0.5214	0.0371	0.0121	0.0043	0.4194	0.0057	140.498	-65.468	-1.2	1567
PLS-91-1-31	Tierney and Tingley 2015	0.5336	0.0275	0.0078	0.0035	0.4238	0.0038	21.273	73.724	5.3	1536
PS2334-1	Tierney and Tingley 2015	0.541	0.0527	0.0221	0.0033	0.371	0.0099	-52	-57.9175	2.3	4557
PS2336-1	Tierney and Tingley 2015	0.5614	0.0533	0.0226	0	0.3539	0.0089	-53.9885	-57.1518	2.7	4006
PS2339-1	Tierney and Tingley 2015	0.5265	0.0611	0.0232	0.0046	0.372	0.0126	-56.9433	-56.0308	4	4542
PS2342-1	Tierney and Tingley 2015	0.4988	0.0659	0.0259	0.0047	0.3917	0.0131	-57.9843	-55.2582	5.1	4372
PS2489-2	Tierney and Tingley 2015	0.4497	0.068	0.044	0.0037	0.4187	0.0159	8.9733	-42.8733	10.1	3794
PS2579-1	Tierney and Tingley 2015	0.6066	0.0459	0.0149	0.0025	0.3221	0.0079	7.7717	-62.9583	-0.4	5305
PS2589-2	Tierney and Tingley 2015	0.5795	0.0552	0.0178	0.0029	0.3372	0.0075	24.9767	-66.0017	-1.5	4641
PS2659-2	Tierney and Tingley 2015	0.5006	0.0674	0.0389	0.0016	0.3815	0.0101	-85.688	-50.749	6.8	4579
PS2663-4	Tierney and Tingley 2015	0.5546	0.0547	0.0277	0.0022	0.3541	0.0067	-89.547	-53.287	7.4	4972
PS2687-5	Tierney and Tingley 2015	0.5462	0.0565	0.0321	0.0024	0.3518	0.0109	-92.556	-68.074	-0.5	4454
PS2691-1	Tierney and Tingley 2015	0.5339	0.0659	0.0216	0.0011	0.3713	0.0061	-91.171	-65.395	1	4715
PS2697-1	Tierney and Tingley 2015	0.4546	0.0795	0.0335	0.0038	0.418	0.0106	-89.493	-62.997	2.6	4783
PS2715-3	Tierney and Tingley 2015	0.5447	0.0662	0.0277	0.0017	0.3526	0.007	-88.008	-57.041	6.2	5190
PS63/130-2	Tierney and Tingley 2015	0.5794	0.0538	0.0193	0.0023	0.3387	0.0064	23.0009	-61.4995	0.8	5220
PS63/139-2	Tierney and Tingley 2015	0.577	0.057	0.0188	0.0036	0.3356	0.008	23.0008	-58.2994	0.5	5413
PS63/143-2	Tierney and Tingley 2015	0.5816	0.0496	0.0156	0.0029	0.3428	0.0074	23.0141	-56.5071	1.6	4872
PS68/371-2	Tierney and Tingley 2015	0.5504	0.0386	0.0135	0.0038	0.3704	0.0233	14.6632	71.9604	6.9	1352
PS69/793-1	Tierney and Tingley 2015	0.4931	0.0159	0.0041	0.0024	0.4829	0.0016	72.8878	-68.0113	-0.5	703
PS69/853-2	Tierney and Tingley 2015	0.4912	0.0307	0.0079	0	0.4702	0	69.2178	-65.998	0.2	2365
PS69/878-4	Tierney and Tingley 2015	0.5653	0.0358	0.0109	0.0023	0.3858	0	82.6562	-65.3425	-1	3093
PS69/885-1	Tierney and Tingley 2015	0.5226	0.0407	0.0128	0.0027	0.4175	0.0037	82.8733	-63.8372	0.6	3702
PS69/891-3	Tierney and Tingley 2015	0.5127	0.0618	0.0215	0.0033	0.3955	0.0053	82.836	-62.6557	0.7	2295
PS69/899-1	Tierney and Tingley 2015	0.5191	0.0537	0.0177	0.003	0.4002	0.0064	85.6737	-59.6217	1.7	4126
PS69/907-3	Tierney and Tingley 2015	0.4523	0.0672	0.0281	0.0026	0.4421	0.0078	73.3332	-55.0048	2.1	2251
PS69/912-5	Tierney and Tingley 2015	0.5263	0.0342	0.0109	0.0037	0.4215	0.0034	71.5652	-50.3107	2.7	565
PS75/034-1	Tierney and Tingley 2015	0.486	0.0703	0.0353	0.0032	0.3995	0.0056	-80.0897	-54.3685	7	4450
PS75/051-2	Tierney and Tingley 2015	0.4717	0.0627	0.0338	0.0033	0.4134	0.0151	-107.805	-52.8123	6.8	3977
PS75/053-1	Tierney and Tingley 2015	0.5165	0.0692	0.0309	0.0038	0.3682	0.0115	-115.98	-60.7692	2.6	5132
PS75/062-1	Tierney and Tingley 2015	0.5482	0.0736	0.0295	0.0028	0.3362	0.0096	-135.626	-58.277	1.5	4147
PS75/063-2	Tierney and Tingley 2015	0.548	0.0604	0.0248	0.0028	0.3503	0.0137	-135.621	-58.9042	1.5	3790
PS75/065-2	Tierney and Tingley 2015	0.5851	0.0656	0.0175	0.0023	0.322	0.0075	-141.515	-62.6039	0.7	4488
PS75/068-1	Tierney and Tingley 2015	0.5682	0.0462	0.0178	0.0019	0.3573	0.0086	-144.115	-64.9334	-1.5	3727
PS75/069-2	Tierney and Tingley 2015	0.5807	0.0632	0.0193	0.0023	0.3232	0.0114	-145.619	-62.2055	-0.2	4328
PS75/070-1	Tierney and Tingley 2015	0.5516	0.0614	0.0226	0.0028	0.3524	0.0092	-150.066	-58.5814	0.2	2839
PS75/072-3	Tierney and Tingley 2015	0.563	0.0672	0.026	0.0035	0.3307	0.0097	-151.219	-57.5599	1	3096
PS75/074-1	Tierney and Tingley 2015	0.5296	0.0703	0.0301	0.0027	0.3522	0.0152	-152.655	-56.2445	2.1	3318
PS75/076-1	Tierney and Tingley 2015	0.4954	0.0719	0.0347	0.0029	0.3845	0.0105	-156.141	-55.5285	4.7	3745
PS75/080-2	Tierney and Tingley 2015	0.5449	0.0641	0.0272	0.0027	0.3531	0.008	-157.637	-58.1774	2	3870
PS75/082-2	Tierney and Tingley 2015	0.5387	0.0712	0.03	0.0033	0.3479	0.0088	-158.364	-59.0417	3.1	4004
PS75/084-1	Tierney and Tingley 2015	0.5464	0.0592	0.0268	0.0034	0.357	0.0072	-159.587	-61.0498	0.6	3313
PS75/085-2	Tierney and Tingley 2015	0.5371	0.0638	0.0264	0.0029	0.3599	0.0099	-160.119	-61.9394	0.6	3724
PS75/086-1	Tierney and Tingley 2015	0.5915	0.0545	0.0194	0.0023	0.3258	0.0064	-161.904	-64.744	-1.1	4064
PS75/087-2	Tierney and Tingley 2015	0.5809	0.0484	0.0175	0.0026	0.3421	0.0085	-163.325	-66.7879	-0.5	4411
PS75/088-3	Tierney and Tingley 2015	0.5497	0.0502	0.019	0.0028	0.3677	0.0106	-164.801	-68.7303	-0.2	3849
PS75/089-6	Tierney and Tingley 2015	0.5576	0.0562	0.018	0.0027	0.3541	0.0114	-165.542	-67.083	0	4121
PS75/090-6	Tierney and Tingley 2015	0.5626	0.0578	0.0204	0.0025	0.3483	0.0085	-166.155	-65.411	0.2	3480
PS75/091-6	Tierney and Tingley 2015	0.5707	0.0684	0.0246	0.003	0.323	0.0103	-169.075	-63.6938	0.7	2944
PS75/092-1	Tierney and Tingley 2015	0.5065	0.0798	0.0342	0.0028	0.3633	0.0133	-169.502	-60.6673	1.7	3833
PS75/094-3	Tierney and Tingley 2015	0.5406	0.0653	0.0271	0.0026	0.3547	0.0096	-169.741	-61.8224	1.2	3274
PS75/095-6	Tierney and Tingley 2015	0.516	0.0699	0.0316	0.0039	0.3681	0.0105	-174.431	-57.0196	4.5	4857
PS75/097-5	Tierney and Tingley 2015	0.5314	0.0673	0.0341	0.0027	0.3528	0.0116	-171.357	-59.7004	4	4675
PS75/098-6	Tierney and Tingley 2015	0.5074	0.0677	0.0349	0.0037	0.3712	0.0153	-179.01	-52.9663	8.3	5187
PS75/099-1	Tierney and Tingley 2015	0.5105	0.0639	0.0346	0.0045	0.3719	0.0147	177.273	-48.2618	8.9	1270
PS75/100-1	Tierney and Tingley 2015	0.4991	0.0653	0.0364	0.0035	0.383	0.0127	177.149	-45.7576	12	2502
PS75/101-2	Tierney and Tingley 2015	0.5046	0.0692	0.0316	0.0044	0.3769	0.0133	175.876	-45.8062	10.9	1773
PS75/104-2	Tierney and Tingley 2015	0.5052	0.0582	0.029	0.0071	0.3917	0.0088	174.526	-44.7693	11.4	835
PS75/105-1	Tierney and Tingley 2015	0.5133	0.0502	0.0231	0.0066	0.3953	0.0115	174.625	-44.4086	11.4	669
RS01-MC359	Tierney and Tingley 2015	0.1013	0.0459	0.0906	0.0226	0.6541	0.0855	34.597	27.687	25.3	1018
RS08-MC601	Tierney and Tingley 2015	0.1705	0.0584	0.0995	0.02	0.5709	0.0807	35.047	27.712	25.3	863
RS09-MC596	Tierney and Tingley 2015	0.0989	0.047	0.0962	0.0222	0.654	0.0816	35.405	27.053	25.7	628
RS13-MC360	Tierney and Tingley 2015	0.1231	0.0545	0.1113	0.0241	0.5947	0.0924	35.36	26.292	25.7	1175
RS15-MC362	Tierney and Tingley 2015	0.1112	0.0477	0.0924	0.0213	0.6395	0.0878	35.085	25.75	25.9	666
RS17-MC363	Tierney and Tingley 2015	0.1137	0.0497	0.1137	0.022	0.6022	0.0988	35.608	25.522	25.9	941
RS19-MC364	Tierney and Tingley 2015	0.1061	0.0458	0.1216	0.021	0.6056	0.0999	36.23	24.76	26.6	1185
RS23-MC365	Tierney and Tingley 2015	0.0828	0.0393	0.1143	0.0215	0.6269	0.1152	36.712	23.312	26.8	1024
RS24-MC71	Tierney and Tingley 2015	0.0874	0.0402	0.1155	0.0205	0.6156	0.1207	36.982	23.392	26.8	1387
RS26-MC73	Tierney and Tingley 2015	0.0771	0.0373	0.1111	0.0236	0.6423	0.1086	37.377	22.915	27.4	1324
RS29-MC79	Tierney and Tingley 2015	0.0768	0.0327	0.1125	0.0226	0.6377	0.1177	37.782	22.252	27.4	1521
RS31-MC85	Tierney and Tingley 2015	0.0795	0.0377	0.1249	0.0236	0.6174	0.1169	37.98	21.428	28	1538
RS39-MC95	Tierney and Tingley 2015	0.0721	0.0368	0.1015	0.0208	0.6691	0.0996	38.012	19.907	28.8	713
RS41-MC101	Tierney and Tingley 2015	0.0841	0.0401	0.1228	0.0238	0.617	0.1122	38.423	20.105	28.6	2309
RS42-MC113	Tierney and Tingley 2015	0.0749	0.0385	0.1079	0.0231	0.639	0.1167	38.608	19.64	28.8	1991
RS44-MC111	Tierney and Tingley 2015	0.0781	0.0372	0.1074	0.0211	0.6565	0.0998	38.722	19.458	28.8	1825
RS46-MC108	Tierney and Tingley 2015	0.0747	0.0367	0.1016	0.0194	0.6622	0.1054	39.053	19.135	29.1	1657
RS50-MC105	Tierney and Tingley 2015	0.0808	0.0422	0.1028	0.0186	0.6564	0.0992	39.057	18.602	29.2	501
RS51-MC366	Tierney and Tingley 2015	0.0904	0.043	0.0983	0.0195	0.6583	0.0905	40.022	17.362	29.3	475
RS53-MC367	Tierney and Tingley 2015	0.1146	0.0457	0.0807	0.019	0.6577	0.0823	41.67	15.56	29	604
S017	Tierney and Tingley 2015	0.182	0.05	0.064	0.011	0.635	0.058	119.5	20.25	26.9	2800
S031	Tierney and Tingley 2015	0.176	0.051	0.07	0.011	0.63	0.061	111	10.5	27.9	2521
S052	Tierney and Tingley 2015	0.152	0.046	0.068	0.016	0.66	0.059	115.5	7.25	28.5	1609
S072	Tierney and Tingley 2015	0.204	0.057	0.07	0.012	0.602	0.055	119.09	20.65	26.9	3447
S098	Tierney and Tingley 2015	0.181	0.048	0.065	0.012	0.642	0.051	119.88	19.31	27.2	4182
S137	Tierney and Tingley 2015	0.194	0.05	0.063	0.009	0.625	0.06	118.36	17.28	27.3	3986
S181	Tierney and Tingley 2015	0.18	0.049	0.072	0.009	0.628	0.061	117.84	17.29	27.2	3960
S199	Tierney and Tingley 2015	0.177	0.052	0.076	0.009	0.622	0.063	118.93	16.17	27.9	3675
Santa Barbara basin	Tierney and Tingley 2015	0.4363	0.0824	0.0507	0.0021	0.4135	0.0151	-120.017	34.217	14.8	530
SEPT01-07 BEN	Tierney and Tingley 2015	0.4892	0.0156	0.0052	0.003	0.4848	0.0021	-66.712	50.621	5.5	214
SO202-01-3	Tierney and Tingley 2015	0.4824	0.073	0.0388	0.004	0.3894	0.0124	152.92	44.0259	6	5282
SO202-02-4	Tierney and Tingley 2015	0.4922	0.0798	0.0409	0.0035	0.3726	0.0109	156.982	46.9689	5.3	4822
SO202-03-4	Tierney and Tingley 2015	0.4359	0.082	0.0535	0	0.4286	0	160.379	49.6141	4.9	5429
SO202-04-3	Tierney and Tingley 2015	0.4306	0.0924	0.041	0	0.4222	0.0138	163.16	51.8633	5.1	5273
SO202-05-3	Tierney and Tingley 2015	0.4564	0.0873	0.0533	0.0037	0.3981	0.0013	164.919	52.6961	5.3	3362
SO202-08-1	Tierney and Tingley 2015	0.4852	0.0735	0.0378	0.004	0.3981	0.0013	170.821	50.5422	5.9	3630
SO202-09-2	Tierney and Tingley 2015	0.463	0.0649	0.0407	0.0067	0.4089	0.0158	175.161	49.6635	6.2	5028
SO202-10-2	Tierney and Tingley 2015	0.4877	0.0559	0.0327	0.0037	0.4088	0.0112	179.848	52.7427	5.3	1488
SO202-11-1	Tierney and Tingley 2015	0.7588	0.1155	0.0583	0	0.0674	0	178.9	53.1113	5.3	2704
SO202-13-4	Tierney and Tingley 2015	0.4475	0.07	0.043	0.0033	0.4241	0.0121	177.957	54.9788	5.5	1383
SO202-15-4	Tierney and Tingley 2015	0.4682	0.0602	0.0337	0.0036	0.4242	0.0102	-179.849	59.5124	4.4	3137
SO202-16-1	Tierney and Tingley 2015	0.447	0.0356	0.0165	0.003	0.4891	0.0088	-179.11	60.403	4.6	548
SO202-18-1	Tierney and Tingley 2015	0.4577	0.0751	0.0421	0.0032	0.4101	0.0118	-179.443	60.1263	4.6	1108
SO202-21-2	Tierney and Tingley 2015	0.4388	0.0687	0.028	0.0074	0.4461	0.0111	-170.328	54.7888	5.5	1911
SO202-22-1	Tierney and Tingley 2015	0.4963	0.0556	0.0275	0.0036	0.4093	0.0078	-168.812	54.5737	5.5	1478
SO202-23-4	Tierney and Tingley 2015	0.4385	0.0779	0.0555	0	0.4102	0.018	-160.504	52.1727	7.1	4613
SO202-24-2	Tierney and Tingley 2015	0.4415	0.0714	0.0533	0	0.421	0.0128	-157.193	53.0025	6.8	4565
SO202-25-1	Tierney and Tingley 2015	0.4447	0.0851	0.0521	0	0.4012	0.017	-152.686	54.0985	6.9	4588
SO202-26-1	Tierney and Tingley 2015	0.4467	0.0702	0.0467	0	0.4205	0.016	-150.383	54.6378	6.9	742
SO202-27-1	Tierney and Tingley 2015	0.4279	0.0794	0.0516	0.004	0.4229	0.0142	-149.597	54.2962	7	2916
SO202-28-1	Tierney and Tingley 2015	0.4391	0.0803	0.0512	0.0038	0.4121	0.0136	-148.884	54.4185	7.1	3710
SO202-29-5	Tierney and Tingley 2015	0.7312	0.1237	0.0765	0.0057	0.0613	0.0018	-148.895	52.028	7.4	3984
SO202-32-5	Tierney and Tingley 2015	0.4857	0.0611	0.0373	0.0035	0.4023	0.01	-158.5	45.5003	9.6	5302
SO202-33-5	Tierney and Tingley 2015	0.4465	0.0595	0.0288	0.003	0.4483	0.0139	-174.141	45.0838	7.8	6159
SO202-34-4	Tierney and Tingley 2015	0.444	0.0657	0.0392	0.0045	0.4295	0.0171	-177.676	40.8875	13.4	5713
SO202-36-6	Tierney and Tingley 2015	0.7234	0.1208	0.0704	0.0099	0.0728	0.0028	176.697	38.1898	15.6	4522
SO202-37-1	Tierney and Tingley 2015	0.7106	0.1187	0.0761	0	0.0904	0.0042	176.268	37.7675	16.9	3573
SO202-38-1	Tierney and Tingley 2015	0.4646	0.0621	0.0375	0	0.4102	0.0257	169.281	38.0435	16.1	5503
SO202-39-2	Tierney and Tingley 2015	0.4263	0.0665	0.0437	0	0.4439	0.0196	164.447	38.0115	16	5096
SO202-41-3	Tierney and Tingley 2015	0.4192	0.0646	0.0429	0.0064	0.4454	0.0214	160.334	38.4132	16.4	5408
SO202-42-3	Tierney and Tingley 2015	0.7518	0.1037	0.0667	0.0102	0.065	0.0027	157.628	38.8917	15.9	5535
SO202-45-2	Tierney and Tingley 2015	0.4224	0.0647	0.0428	0	0.4544	0.0157	149.485	40.2917	13	5476
SO95-17941	Tierney and Tingley 2015	0.2	0.059	0.078	0.011	0.597	0.056	118.48	21.52	26.7	2201
SO95-17942	Tierney and Tingley 2015	0.169	0.051	0.063	0.014	0.651	0.053	113.2	19.33	26.5	329
SO95-17943	Tierney and Tingley 2015	0.193	0.06	0.077	0.013	0.593	0.065	117.55	18.95	26.9	917
SO95-17944	Tierney and Tingley 2015	0.197	0.061	0.073	0.01	0.604	0.054	113.64	18.66	26.8	1219
SO95-17945	Tierney and Tingley 2015	0.193	0.066	0.07	0.009	0.613	0.048	113.78	18.13	26.8	2404
SO95-17946	Tierney and Tingley 2015	0.217	0.055	0.073	0.009	0.592	0.054	114.25	18.13	26.8	3465
SO95-17947	Tierney and Tingley 2015	0.2	0.063	0.086	0.012	0.575	0.065	116.03	18.47	26.9	3765
SO95-17948	Tierney and Tingley 2015	0.213	0.057	0.073	0.011	0.592	0.054	114.9	16.71	27.1	2841
SO95-17949	Tierney and Tingley 2015	0.203	0.064	0.087	0.011	0.573	0.06	115.17	17.35	26.9	2195
SO95-17950	Tierney and Tingley 2015	0.193	0.062	0.085	0.011	0.591	0.059	112.9	16.09	28	1868
SO95-17951	Tierney and Tingley 2015	0.183	0.057	0.077	0.01	0.625	0.049	113.41	16.29	27.3	2340
SO95-17952	Tierney and Tingley 2015	0.212	0.06	0.078	0.01	0.584	0.057	114.47	16.67	27.1	2864
SO95-17954	Tierney and Tingley 2015	0.205	0.061	0.078	0.012	0.586	0.058	111.53	14.8	27.4	1517
SO95-17955	Tierney and Tingley 2015	0.201	0.058	0.075	0.01	0.604	0.053	112.18	14.12	27.6	2404
SO95-17956	Tierney and Tingley 2015	0.213	0.062	0.085	0.01	0.571	0.059	112.59	13.85	27.7	3387
SO95-17957	Tierney and Tingley 2015	0.218	0.055	0.079	0.009	0.577	0.061	115.3	10.9	28.1	2197
SO95-17958	Tierney and Tingley 2015	0.199	0.052	0.076	0.009	0.606	0.058	115.08	11.62	28.2	2581
SO95-17959	Tierney and Tingley 2015	0.179	0.05	0.08	0.01	0.63	0.051	115.29	11.14	28.2	1957
SO95-17960	Tierney and Tingley 2015	0.179	0.052	0.077	0.01	0.633	0.049	115.56	10.12	28.1	1707
SO95-17962	Tierney and Tingley 2015	0.145	0.05	0.071	0.013	0.663	0.058	112.08	7.18	28.9	1970
SO95-17963	Tierney and Tingley 2015	0.135	0.05	0.077	0.014	0.667	0.058	112.67	6.17	28.5	1233
SO95-17964	Tierney and Tingley 2015	0.119	0.047	0.072	0.015	0.7	0.046	112.21	6.16	28.5	1556
SO95-17965	Tierney and Tingley 2015	0.137	0.049	0.07	0.013	0.67	0.06	112.55	6.16	28.5	889
South Frisian Front	Tierney and Tingley 2015	0.4781	0.043	0.0174	0.0068	0.4498	0.0049	4.5	53.5	10.6	24
ST-32	Tierney and Tingley 2015	0.5112	0.0533	0.022	0.0038	0.3923	0.0174	143.682	-56.002	2.3	3429
ST-34	Tierney and Tingley 2015	0.5417	0.0505	0.0176	0.003	0.3781	0.0092	142.002	-60.045	1.5	4354
ST-35	Tierney and Tingley 2015	0.5119	0.0597	0.0233	0.0038	0.3865	0.0148	141.675	-62.013	0.4	4265
Station A	Tierney and Tingley 2015	0.4826	0.0197	0.0051	0.0025	0.487	0.0031	-79.712	60.621	6.8	129
Station B	Tierney and Tingley 2015	0.4794	0.0181	0.0048	0.0025	0.4917	0.0035	-81.712	60.621	8.7	156
SX15	Tierney and Tingley 2015	0.175	0.05	0.069	0.012	0.64	0.054	119.5	21.25	27	2500
T89-10	Tierney and Tingley 2015	0.3429	0.0696	0.0654	0.0088	0.4751	0.0381	1.322	-2.077	25	2088
T89-12	Tierney and Tingley 2015	0.3484	0.0695	0.0632	0.0035	0.4421	0.0733	7.973	-5.2	26.5	4068
T89-13	Tierney and Tingley 2015	0.1884	0.0503	0.0652	0.0102	0.6468	0.0391	9.238	-4.107	25.4	3092
T89-14	Tierney and Tingley 2015	0.2911	0.0759	0.0732	0.0142	0.5139	0.0318	9.69	-3.509	25.3	868
T89-15	Tierney and Tingley 2015	0.2987	0.0774	0.0816	0.0133	0.4918	0.0373	10.022	-4.213	25.2	1930
T89-16	Tierney and Tingley 2015	0.2723	0.0743	0.0804	0.0173	0.5192	0.0363	11.228	-5.705	25	826
T89-17	Tierney and Tingley 2015	0.3191	0.0734	0.0738	0.0164	0.4724	0.0447	7.805	-6.818	26.3	4253
T89-19	Tierney and Tingley 2015	0.3389	0.0778	0.0765	0.0126	0.4624	0.0318	9.955	-6.043	26.1	3140
T89-20	Tierney and Tingley 2015	0.2737	0.0661	0.0746	0.0109	0.5372	0.0375	11.537	-7.307	25.9	1080
T89-21	Tierney and Tingley 2015	0.2628	0.0708	0.0743	0.0158	0.5438	0.0324	11.993	-7.275	25.9	490
T89-22	Tierney and Tingley 2015	0.2571	0.074	0.0754	0.0137	0.5483	0.0315	12.067	-7.13	25.9	200
T89-23	Tierney and Tingley 2015	0.2758	0.0678	0.0733	0.014	0.5384	0.0307	12.108	-8.513	24.9	796
T89-24	Tierney and Tingley 2015	0.3241	0.0813	0.0848	0.01	0.4627	0.0371	12.058	-8.908	24.9	2157
T89-25	Tierney and Tingley 2015	0.2383	0.0581	0.0735	0.0118	0.5901	0.0283	10.608	-9.368	25.7	4164
T89-28	Tierney and Tingley 2015	0.1695	0.0709	0.0892	0.0113	0.6436	0.0157	5.637	-10.387	24.6	5307
T89-30	Tierney and Tingley 2015	0.3931	0.0796	0.0613	0.0051	0.4273	0.0336	8.22	-14.877	22.1	4752
T89-32	Tierney and Tingley 2015	0.335	0.0896	0.0627	0.0087	0.4717	0.0324	10.668	-14.893	21.9	3342
T89-33	Tierney and Tingley 2015	0.3645	0.0895	0.0729	0.0126	0.4322	0.0284	11.62	-14.96	23.2	2027
T89-34	Tierney and Tingley 2015	0.322	0.0759	0.0599	0.01	0.5052	0.0269	11.967	-15.127	20.8	999
T89-35	Tierney and Tingley 2015	0.3168	0.0642	0.0499	0.0097	0.534	0.0254	11.62	-17.293	18.5	802
T89-36	Tierney and Tingley 2015	0.3522	0.0556	0.0336	0.0111	0.5269	0.0206	13.838	-14.96	23.2	131
T89-40	Tierney and Tingley 2015	0.3533	0.0909	0.0732	0.0068	0.4476	0.0282	6.782	-21.617	20	3060
T89-41	Tierney and Tingley 2015	0.3473	0.0911	0.0716	0.0058	0.4471	0.0371	6	-20.8	20.2	4282
T89-47	Tierney and Tingley 2015	0.3528	0.0878	0.0719	0.0055	0.4494	0.0326	4.427	-8.787	25.1	5362
TSP-1	Tierney and Tingley 2015	0.3961	0.0619	0.0392	0.006	0.4718	0.0251	147.49	-47.572	10.2	1301
TSP-2	Tierney and Tingley 2015	0.4492	0.0709	0.0411	0.0055	0.4167	0.0166	146.9	-48.127	9.7	2283
TSP-3	Tierney and Tingley 2015	0.454	0.0675	0.04	0.0043	0.4194	0.0149	146.41	-48.558	9.7	2897
WM1 MC33	Tierney and Tingley 2015	0.5034	0.0266	0.0123	0.0042	0.4472	0.0063	-124.3	46.333	11.8	70
WM2 MC30	Tierney and Tingley 2015	0.4653	0.0275	0.0153	0.0055	0.4781	0.0083	-124.383	46.5	11.8	90
WM3 MC28	Tierney and Tingley 2015	0.472	0.0255	0.0109	0.0021	0.4842	0.0054	-124.633	46.667	11.8	150
WM4 MC21	Tierney and Tingley 2015	0.4461	0.053	0.0288	0.0038	0.4565	0.0117	-125	46.817	12.4	600
WM5 MC20	Tierney and Tingley 2015	0.4304	0.0617	0.0385	0.0038	0.451	0.0147	-125.2	46.75	12.4	1000
XGA7-MC123	Tierney and Tingley 2015	0.2102	0.0669	0.0783	0.0125	0.5662	0.066	47.915	13.078	28.1	2215
IK9367-2	Tierney and Tingley 2015	0.4537	0.0191	0.0055	0.0045	0.5133	0.0038	123.842	75.4817	3.2	44
IK9307-3	Tierney and Tingley 2015	0.411	0.0211	0.0129	0.0074	0.5408	0.0067	131.297	72.55	3	21
XP98-MC1	Seki et al. 2014	0.651278	0.065892	0.0253786	0.00405241	0.246337	0.00706216	152.023	50.987	4.8	1102
XP98-MC2	Seki et al. 2014	0.654777	0.0578477	0.021928	0.00299181	0.255433	0.0070227	148.292	50.392	5.5	1258
XP98-MC3	Seki et al. 2014	0.589412	0.0735913	0.0359334	0.00328855	0.290074	0.00770002	146.333	53.767	6.9	1576
XP99 St.2MC	Seki et al. 2014	0.589884	0.0864383	0.0405234	0.00517289	0.269457	0.00852434	152.536	46.557	4.5	2625
XP99 St.16MC	Seki et al. 2014	0.66765	0.0668468	0.0251212	0.00356096	0.230571	0.00625013	151.108	47.202	3.8	3362
XP99 St.19MC	Seki et al. 2014	0.816471	0.0968958	0.0407262	0.00392439	0.0324256	0.00955688	149.69	48.591	4.7	1613
XP99 St.22MC	Seki et al. 2014	0.760248	0.029632	0.0077659	0.00304153	0.195812	0.00350073	145.671	49.521	5.8	490
XP99 St.MC5	Seki et al. 2014	0.677499	0.0381323	0.0125383	0.00456588	0.261736	0.005529	145.051	51.459	5.6	787
XP99−MC8	Seki et al. 2014	0.682816	0.0393523	0.0147815	0.00299538	0.255085	0.00497059	144.017	55.503	4.5	923
XP99 St.50MC	Seki et al. 2014	0.672822	0.0201367	0.00608219	0.00295629	0.292357	0.00564602	140.841	55.586	7.4	184
XP99 St.53MC	Seki et al. 2014	0.167089	0.0456071	0.0135589	0.0115045	0.753201	0.00903924	139.858	55.65	8	141
XP99 St.59MC	Seki et al. 2014	0.662439	0.018835	0.00646479	0.00442259	0.303832	0.00400635	138.902	55.741	8.2	108
XP99 St.63MC	Seki et al. 2014	0.685625	0.0206891	0.00593188	0.00440902	0.279966	0.00337928	141.001	54.987	7.8	134
XP99 St.68MC	Seki et al. 2014	0.651503	0.0211372	0.00687705	0.00488241	0.312355	0.00324501	141.991	54.986	7.4	117
XP00 St.31MC	Seki et al. 2014	0.660716	0.058476	0.0274258	0.00353881	0.243108	0.00673516	147.473	49.538	6.6	1242
XP00 MC5	Seki et al. 2014	0.688832	0.0205028	0.00668282	0.00436371	0.275823	0.00379577	144.133	51.251	5.9	154
XP00 MC6	Seki et al. 2014	0.664791	0.0217244	0.00675371	0.00397719	0.298402	0.00435239	143.839	52.972	6.1	72
XP00 MC7	Seki et al. 2014	0.635181	0.019254	0.00635081	0.00493952	0.33004	0.00423387	144.39	52.976	6	444
XP00 MC14	Seki et al. 2014	0.660228	0.0158441	0.00424757	0.00296656	0.3125	0.00421386	143.006	55.005	6.1	105
Kh06-G12	Seki et al. 2014	0.159278	0.0654454	0.0195777	0.00825059	0.7371	0.0103482	141.988	54.24	8.6	48
Kh06-F5	Seki et al. 2014	0.644227	0.0209325	0.0064485	0.00385705	0.320215	0.00431909	141.985	55.473	6.5	245
Kh06-D3	Seki et al. 2014	0.704266	0.0350221	0.0118364	0.00332705	0.240242	0.00530669	144.141	54.003	5.9	970
Kh06-D1	Seki et al. 2014	0.646587	0.0741639	0.0286774	0.0031403	0.240322	0.00711011	144.85	54.005	6.9	1425
Kh07-C6	Seki et al. 2014	0.68432	0.0312494	0.0112743	0.00418701	0.263107	0.00586181	145.002	52.241	6.2	850
Kh07-C9	Seki et al. 2014	0.604625	0.0831451	0.043995	0.00350006	0.255292	0.00944269	146.003	52.242	6.5	1431
Kh06-B7	Seki et al. 2014	0.658345	0.0203379	0.00726355	0.00493157	0.304725	0.00439636	144.518	49.501	7	127
Kh07-B6	Seki et al. 2014	0.736487	0.0220174	0.00664803	0.00383203	0.227142	0.00387329	145.002	49.492	6.4	267
Kh07-B1	Seki et al. 2014	0.655081	0.0701479	0.0284371	0.00434317	0.233474	0.00851738	148.259	49.5	5.6	1035
YK07-12 St1	Seki et al. 2014	0.644613	0.0698155	0.0298931	0.00362932	0.243424	0.0086245	149.205	51.272	5.1	1250
YK07-12 St5	Seki et al. 2014	0.647606	0.0909542	0.0377175	0.00342806	0.210896	0.00939836	149.141	52.657	5	1000
YK07-12 St6	Seki et al. 2014	0.640409	0.0817633	0.0404485	0.00307915	0.226605	0.00769449	149	53.153	5	1500
YK07-12 St8	Seki et al. 2014	0.626466	0.0589564	0.0301506	0.00379236	0.271006	0.00962883	150.074	53.276	4.7	1140
YK07-12 St10	Seki et al. 2014	0.728855	0.0320991	0.00887731	0.00269839	0.222457	0.00501353	149.323	54.751	4.7	600
ODP767	Seki et al. 2014	0.237788	0.0624716	0.082381	0.0148259	0.553269	0.0492652	123.3	4.47	28.9	4095
ODP772	Seki et al. 2014	0.151475	0.049126	0.0890516	0.0154847	0.643897	0.050965	119.421	16.391	28.3	1529
ODP782	Seki et al. 2014	0.30114	0.0666534	0.0659849	0.0095977	0.52301	0.0336135	141.189	30.517	22.9	2958
ODP793	Seki et al. 2014	0.263334	0.0552572	0.0556853	0.0105853	0.578769	0.0363689	140.533	31.635	22.7	2964
ODP796	Seki et al. 2014	0.480915	0.0506906	0.0232553	0.00369851	0.432251	0.00918908	139.247	42.509	12	2570
ODP799	Seki et al. 2014	0.483045	0.033059	0.0171752	0.00626584	0.451501	0.00895399	133.52	39.132	13.4	2073
ODP808	Seki et al. 2014	0.290836	0.0607596	0.0655199	0.0129059	0.533114	0.0368641	134.567	32.211	23.1	4676
ODP871	Seki et al. 2014	0.273407	0.0662171	0.0762656	0.0128028	0.538284	0.033024	172.207	5.334	28.8	1254
ODP882	Seki et al. 2014	0.258087	0.0707107	0.0816609	0.0117077	0.534953	0.0428805	167.36	50.218	5.5	3244
ODP883	Seki et al. 2014	0.468887	0.0680333	0.0301797	0.00310235	0.41919	0.0106078	167.461	51.119	5.5	3826
ODP884	Seki et al. 2014	0.430526	0.0723556	0.0342575	0.00385524	0.446037	0.0129687	168.202	51.27	5.5	3826
ODP887	Seki et al. 2014	0.45096	0.0566585	0.043822	0.00311991	0.432666	0.0127739	−148.268	54.219	7.2	3631
ODP1144	Seki et al. 2014	0.248001	0.0709587	0.0905525	0.0142356	0.520635	0.0556171	117.251	20.318	26.4	2035
ODP1148	Seki et al. 2014	0.234625	0.0633658	0.081566	0.012039	0.553257	0.0551467	116.339	18.502	27	3297
ODP1149	Seki et al. 2014	0.351376	0.0501572	0.0529733	0.0102203	0.499581	0.0356918	143.211	31.205	22.5	5817
ODP1173	Seki et al. 2014	0.244804	0.0555548	0.0580971	0.0121828	0.593976	0.0353861	135.151	32.147	22.9	4790
ODP1175	Seki et al. 2014	0.377937	0.0811327	0.0603019	0.00865376	0.450717	0.0212569	134.387	32.359	23.1	2997
ODP1178	Seki et al. 2014	0.287831	0.0702586	0.073828	0.0130501	0.513396	0.0416366	134.288	32.439	23.3	1741
ODP1179	Seki et al. 2014	0.464735	0.0628367	0.0273396	0.00403583	0.428375	0.012678	159.578	41.479	11.5	5565
ODP1202	Seki et al. 2014	0.29489	0.0557031	0.0675669	0.0141	0.528849	0.0388906	122.3	24.482	26.2	1274
ODP1207	Seki et al. 2014	0.356356	0.0487306	0.0363686	0.00417761	0.517435	0.0369316	162.451	37.474	17.1	3100
ODP1208	Seki et al. 2014	0.333859	0.056659	0.0510693	0.00797628	0.518008	0.0324284	158.121	36.763	18.3	3345
ODP1211	Seki et al. 2014	0.299009	0.0575216	0.0540484	0.00966414	0.538098	0.0416593	157.51	32.013	21.4	2907
ODP1212	Seki et al. 2014	0.302046	0.0583686	0.052342	0.00871145	0.540772	0.0377604	157.427	32.269	21.4	2682

## Sheet: Castaneda et al. 2010
GeoB 7702-3 (Castañeda et al., 2010) doi:10.1029/2009PA001740
Eastern Mediterranean
31°39.1′N, 34°04.4′E
								OPTIMAL Op3			BAYSPAR SST (ºC)
Age (cal yr BP)	UK37 SST	GDGT.0	GDGT.1	GDGT.2	GDGT.3	Crenarchaeol	Cren'	D_nearest	SST (ºC)	StDev on SST	5%tile	50%tile	95%tile
141.75		0.21387	0.070294	0.0791	0.016669	0.575562	0.0445	0.135468	27.4009	3.44982	19.1775	24.4371	29.0964
283.5		0.275558	0.063844	0.074965	0.015899	0.535464	0.0343	0.176536	26.2111	3.39471	19.9692	24.0099	29.1552
374.922	23.7	0.235583	0.075737	0.084693	0.015615	0.547097	0.0413	0.252895	26.1945	3.42257	19.5084	23.684	28.7864
466.344		0.234875	0.066247	0.072817	0.015823	0.569395	0.0408	0.311917	26.4467	3.34474	19.9143	24.3062	29.1411
557.766		0.231092	0.068871	0.080903	0.015766	0.564245	0.0391	0.246724	26.8957	3.3636	20.0842	24.5032	29.175
649.188		0.228921	0.069771	0.080259	0.018834	0.565461	0.0368	0.239704	27.5969	3.52696	20.4899	24.3906	29.8105
722.326		0.236309	0.070893	0.076894	0.017442	0.562641	0.0358	0.300013	26.8481	3.40176	19.1979	23.6607	28.3392
832.032		0.227208	0.0737	0.084694	0.016654	0.553768	0.044	0.234882	27.2214	3.40634	20.4466	24.4497	29.3971
923.454		0.242986	0.072778	0.078413	0.01526	0.551708	0.0389	0.258869	25.7557	3.34224	19.3584	23.4238	28.193
1014.88		0.236602	0.069267	0.078017	0.015312	0.561429	0.0394	0.217368	26.3302	3.33326	20.0247	24.0361	29.9721
1106.3	23.3	0.228119	0.068502	0.080474	0.014632	0.567305	0.041	0.205395	26.5081	3.34065	20.3723	24.7187	28.9127
1197.72		0.215424	0.069346	0.081656	0.01746	0.572413	0.0437	0.188583	27.925	3.4224	20.4061	24.7029	29.5435
1299.47	23.9	0.229542	0.072801	0.084338	0.015396	0.556948	0.041	0.259623	26.4788	3.40145	19.5332	24.2056	28.8544
1494.21		0.234389	0.073189	0.08551	0.015379	0.549379	0.0422	0.217113	26.6045	3.37823	20.3259	23.9479	29.5825
1688.94	23.5	0.220137	0.070902	0.087002	0.015419	0.563502	0.043	0.321344	26.9923	3.43219	20.2418	24.9699	29.1853
1883.67	23.3	0.208303	0.068755	0.085943	0.016679	0.574654	0.0457	0.254399	27.9072	3.45326	21.008	25.4378	30.551
2078.41	22.5	0.223634	0.069359	0.08362	0.015427	0.565243	0.0427	0.278435	27.0766	3.37892	20.5519	24.7991	30.3373
2273.14		0.232106	0.072459	0.084831	0.015906	0.553166	0.0415	0.24843	26.8919	3.38227	20.0855	24.6972	29.5021
2467.87		0.223683	0.07091	0.084169	0.015508	0.563819	0.0419	0.294066	26.8575	3.40306	20.1554	24.3627	29.3894
2662.61		0.22438	0.069219	0.0806	0.015841	0.569079	0.0409	0.21112	26.9838	3.38466	20.1582	24.9946	29.5591
2804.9	23.2	0.213971	0.067698	0.080464	0.015194	0.57988	0.0428	0.310398	27.0037	3.40695	21.0033	25.0243	30.0334
2912.23	23.7	0.232485	0.067965	0.079904	0.014661	0.565504	0.0395	0.1904	26.4494	3.33193	20.1677	24.5997	29.8667
3019.57		0.23806	0.065098	0.077738	0.013841	0.56671	0.0386	0.158706	26.2198	3.30076	20.5761	24.5266	29.1046
3126.9		0.240392	0.068087	0.079171	0.014827	0.559954	0.0376	0.192051	26.282	3.32144	20.6898	24.6135	29.4057
3191.3	23.4	0.24368	0.069362	0.076207	0.01369	0.561285	0.0358	0.167334	25.0381	3.30134	18.9925	23.7212	28.8941
3341.57	24.1	0.228908	0.066318	0.080706	0.014127	0.567691	0.0422	0.187111	26.7758	3.31131	20.9656	24.9835	29.8613
3499.54	22.9	0.240146	0.068041	0.078608	0.01396	0.561942	0.0373	0.158851	25.8212	3.30412	19.1997	23.8512	30.1982
3652.92		0.21333	0.068543	0.08003	0.016158	0.580661	0.0413	0.182842	27.2578	3.44875	20.4954	24.8428	29.6334
3883	24.4	0.228277	0.068969	0.076254	0.015542	0.573122	0.0378	0.291389	26.227	3.38487	19.2386	24.0332	28.7825
4074.73	23.6	0.238419	0.070894	0.075022	0.014762	0.563271	0.0376	0.235252	25.2553	3.346	19.0391	23.5283	28.9626
4266.46	24.4	0.23595	0.06666	0.07194	0.013629	0.577501	0.0343	0.212046	24.7347	3.33662	19.0516	24.0415	28.3254
4458.19	25.6	0.23644	0.068103	0.072294	0.014459	0.576258	0.0324	0.25909	24.759	3.37072	19.1622	23.5974	28.7424
4649.92	24.1	0.238768	0.068527	0.0716	0.015734	0.571569	0.0338	0.281742	25.3641	3.37216	18.8309	23.1909	28.4321
4803.31	24.3	0.233758	0.066097	0.070127	0.014469	0.584395	0.0312	0.315455	24.6834	3.38895	18.4593	23.5745	27.6226
5033.38	23	0.229803	0.0662	0.074001	0.013957	0.581886	0.0342	0.190832	25.3229	3.36166	19.0915	23.3437	28.9432
5225.12		0.238102	0.069244	0.067118	0.012664	0.580071	0.0328	0.394778	23.0978	3.39042	18.0221	22.7335	27.4927
5416.85	23.2	0.235176	0.065933	0.069713	0.013313	0.583739	0.0321	0.300501	24.2069	3.35533	18.8145	23.5996	27.5786
5608.58	23.1	0.223796	0.064533	0.07235	0.012845	0.593213	0.0333	0.284121	25.0482	3.35963	19.7239	23.7031	28.9067
5800.31		0.221552	0.061534	0.068232	0.012145	0.605771	0.0308	0.266215	24.6356	3.3785	19.2434	23.3217	27.2055
5992.04	23.3	0.2174	0.064534	0.068164	0.012665	0.605009	0.0322	0.342773	24.6046	3.41787	19.1502	22.8362	27.8178
6222.12	22.3	0.219351	0.064329	0.068547	0.013024	0.60638	0.0284	0.382922	24.3894	3.44673	18.9146	22.8432	27.8576
6493.65		0.234949	0.067209	0.071445	0.015023	0.581724	0.0297	0.354239	24.8658	3.41041	19.001	23.0196	27.2055
6729.96	23.4	0.236094	0.06604	0.067361	0.013522	0.587759	0.0292	0.355787	23.6114	3.38851	17.7861	22.3245	27.6668
7025.35	24	0.235824	0.066241	0.070747	0.014345	0.582801	0.03	0.296744	24.5568	3.38779	19.3334	22.8921	28.4168
7261.65	23.2	0.232915	0.060757	0.076194	0.014174	0.58319	0.0328	0.284086	26.281	3.40726	20.7791	25.2381	29.9631
7527.5	22.7	0.237287	0.061367	0.08305	0.012396	0.56867	0.0372	0.2214	26.4944	3.34448	20.942	25.3637	30.9444
7881.96	23.2	0.245306	0.064204	0.0745	0.01278	0.571775	0.0314	0.29761	24.6799	3.30982	18.994	23.9982	28.1021
8147.81	23.4	0.263241	0.064531	0.084206	0.01086	0.543008	0.0342	0.193544	24.5147	3.31499	20.6484	25.1536	29.735
8554.29	23.6	0.238569	0.058731	0.077203	0.010934	0.583996	0.0306	0.237079	24.5717	3.36595	20.3454	25.1007	30.608
9123.64	22.5	0.238307	0.060367	0.087102	0.01285	0.569178	0.0322	0.347652	26.6618	3.50928	20.7484	25.2884	30.7313
9744.74	23.2	0.252836	0.069017	0.068562	0.014623	0.567172	0.0278	0.289381	23.4366	3.35037	18.0078	21.6268	26.2986
10043.3		0.269813	0.065556	0.066246	0.015181	0.558948	0.0243	0.205067	23.1765	3.34515	17.1263	21.9123	26.0634
10454.7		0.281912	0.070014	0.062132	0.016414	0.547132	0.0224	0.297744	22.2161	3.42042	17.0792	20.6772	25.4939
10866		0.321016	0.071052	0.058639	0.015765	0.514339	0.0192	0.346449	21.234	3.5202	15.2487	19.3602	24.1363
11277.4	19.9	0.352155	0.070828	0.052956	0.014828	0.494473	0.0148	0.380089	20.0837	3.52378	13.5885	17.7324	22.0934
11684.5	19.3	0.380334	0.071429	0.049861	0.015461	0.469233	0.0137	0.225869	19.3701	3.91986	13.3784	17.4419	22.1465
12152.4	20.1	0.395257	0.074197	0.049026	0.017405	0.450732	0.0134	0.623889	19.1914	4.89948	12.3885	16.8503	21.5773
12464.3	20.7	0.350911	0.072114	0.051252	0.014809	0.496427	0.0145	0.393783	19.598	3.51157	13.0069	17.3287	21.6385
12932.2		0.344999	0.069923	0.057571	0.015546	0.496202	0.0158	0.431097	21.2443	3.66441	15.0042	18.637	23.0235
13244.2	20.9	0.316481	0.066954	0.053118	0.014138	0.529589	0.0197	0.174089	19.8726	3.2887	15.4503	19.8073	24.5872
13634.1		0.352817	0.068867	0.04953	0.014113	0.498694	0.016	0.282825	19.5676	3.3796	13.4222	17.7783	22.3274
14024	21.1	0.350601	0.070605	0.05811	0.014679	0.487687	0.0183	0.319109	21.3644	3.55834	15.1911	19.4296	23.6263
14253.4	18.6	0.352601	0.067506	0.060876	0.01531	0.485203	0.0185	0.445253	22.373	3.77467	15.7883	20.2776	24.9554
14584.6	16.1	0.41518	0.063119	0.045779	0.010702	0.452834	0.0124	0.154308	15.4793	3.49004	12.7741	16.8657	21.2456
14890.4	17	0.417077	0.064687	0.038196	0.009179	0.461434	0.00943	0.301362	13.7992	3.32852	9.66104	14.5013	18.6144
15196.2	16.8	0.422088	0.060641	0.037872	0.008906	0.460037	0.0105	0.332849	14.29	3.33967	10.4365	14.5297	19.0638
15451.1	17.3	0.437961	0.056821	0.030201	0.007994	0.458312	0.00871	0.332415	12.4682	3.31953	8.6676	13.002	17.9444
15705.9		0.433639	0.059752	0.033315	0.008025	0.456569	0.0087	0.315899	13.1192	3.32053	9.88085	13.539	17.2821
15960.8		0.440355	0.059152	0.030562	0.007832	0.4535	0.0086	0.268144	12.0816	3.31421	8.467	12.7503	17.1813
16215.6		0.445083	0.054169	0.02927	0.008338	0.451984	0.0112	0.340198	11.6721	3.33918	9.75544	14.5704	18.623
16505.2		0.443729	0.0551	0.032085	0.01141	0.444705	0.013	0.358889	10.5731	3.54908	11.5283	16.4266	20.1673
16641.8		0.408941	0.058363	0.036924	0.011752	0.468496	0.0155	0.175414	15.459	3.42852	13.0889	17.0125	21.7631
16983.5		0.422778	0.056562	0.034513	0.012463	0.457291	0.0164	0.296746	14.2517	3.64259	12.9105	17.1448	21.1008
17325.1		0.424058	0.05711	0.035006	0.012238	0.459159	0.0124	0.276299	13.7361	3.58513	13.1556	17.452	21.2241
17666.7		0.441989	0.055446	0.031077	0.010754	0.448895	0.0118	0.295848	10.3292	3.43491	11.5088	15.3388	19.2423
18008.4		0.40875	0.056446	0.036241	0.010474	0.474557	0.0135	0.109617	15.2313	3.35452	12.5268	16.1951	21.97
18350		0.439141	0.059883	0.033157	0.011311	0.445795	0.0107	0.400247	10.5238	3.49368	11.1457	14.5885	19.526
18623.3	16.8	0.450946	0.059156	0.032811	0.00994	0.438823	0.00832	0.106294	9.80937	3.41739	9.95866	13.7515	19.0068
18960.4	16.4	0.43347	0.059727	0.034098	0.01004	0.451299	0.0114	0.177459	11.6153	3.36625	10.8179	15.0095	19.324
19210.8		0.415453	0.064467	0.038585	0.011556	0.457476	0.0125	0.25226	13.7559	3.42858	11.6345	15.8691	19.9734
19461.3		0.4195	0.060236	0.033106	0.009681	0.467306	0.0102	0.179355	12.9526	3.31972	10.066	14.5043	18.8954
19761.8		0.430479	0.066494	0.038147	0.010666	0.444893	0.00932	0.241996	11.5925	3.428	10.2766	14.182	18.4777
19962.2	15.8	0.45109	0.064676	0.040777	0.010844	0.419722	0.0129	0.388015	11.2976	3.65188	12.078	15.7418	20.3471
20212.6		0.41272	0.064476	0.03975	0.011716	0.460269	0.0111	0.241734	14.2542	3.444	11.5362	15.205	19.7387
20463.1		0.421338	0.066557	0.040063	0.010712	0.449904	0.0114	0.135404	12.9826	3.40067	10.6316	15.0714	19.0049
20713.5	16	0.437027	0.064263	0.037341	0.009958	0.441637	0.00977	0.234461	11.5263	3.39094	10.0969	14.6538	19.8635
20964	16	0.424092	0.067057	0.038845	0.01033	0.448257	0.0114	0.185655	12.4305	3.3751	10.0732	14.9807	18.7095
21214.4	15.8	0.440569	0.068004	0.037917	0.01027	0.431359	0.0119	0.320494	10.6977	3.437	10.252	14.1003	18.9254
21540		0.426952	0.068447	0.037702	0.010548	0.44715	0.0092	0.222291	11.5083	3.41137	9.32339	13.3955	18.3844
21715.3		0.437808	0.063065	0.035702	0.010046	0.44302	0.0104	0.200905	11.0995	3.38576	9.76172	14.6515	19.2181
21979.3		0.441632	0.063992	0.03497	0.009824	0.43983	0.00975	0.175974	10.5389	3.3846	9.08251	13.8677	18.3717
22252.2		0.42182	0.069986	0.040385	0.010783	0.446136	0.0109	0.147784	12.4295	3.42945	10.8841	15.0503	19.3753
22525.2		0.434235	0.067461	0.037608	0.010875	0.44005	0.00977	0.287697	10.9078	3.46893	9.47377	13.7993	18.5421
22852.7		0.403048	0.066954	0.037882	0.010263	0.471324	0.0105	0.206453	14.2863	3.32092	9.46956	14.4719	18.6856
23071		0.419961	0.071734	0.040618	0.01059	0.446798	0.0103	0.149266	12.383	3.42631	9.53395	13.9106	18.2865
23344	14.9	0.403763	0.069777	0.0392	0.010349	0.466484	0.0104	0.167379	13.926	3.34864	9.38474	13.9743	18.1993
23671.5		0.405904	0.072733	0.044669	0.011556	0.454457	0.0107	0.272601	14.4338	3.49245	10.7633	15.1951	19.2275
23835.3		0.428516	0.067131	0.041497	0.012478	0.438189	0.0122	0.427852	12.9676	3.78056	11.7341	16.1222	21.2191
24162.8	15.1	0.422126	0.060757	0.034975	0.0112	0.45858	0.0124	0.268419	12.839	3.39975	11.4374	15.3292	19.599
24411.2		0.411712	0.061548	0.035853	0.013744	0.460711	0.0164	0.444828	16.0971	3.80534	12.148	17.0469	20.6778
24643.1		0.405675	0.06263	0.041374	0.016701	0.454545	0.0191	0.502233	19.1357	4.867	13.8738	18.5123	23.164
24875.1		0.423453	0.067777	0.043222	0.01328	0.439739	0.0125	0.51676	14.337	3.95422	12.1022	16.204	21.1303
25107		0.422535	0.065802	0.039943	0.012967	0.445637	0.0131	0.399753	13.8886	3.77673	11.5909	16.1724	20.5487
25339		0.444475	0.06904	0.041289	0.013289	0.419656	0.0123	0.645578	11.7951	4.35603	11.1682	15.3328	19.2908
25570.9		0.422667	0.066008	0.038375	0.012688	0.447575	0.0127	0.343473	13.3196	3.68671	10.358	15.8793	20.8566
25802.9		0.442276	0.068766	0.041289	0.012122	0.424644	0.0109	0.434036	11.203	3.89054	11.8332	15.6479	19.5344
26034.9		0.435906	0.062399	0.036971	0.011382	0.441556	0.0118	0.376754	11.451	3.53242	10.8877	15.408	19.1611
26300		0.432674	0.061824	0.036647	0.012775	0.442932	0.0131	0.401485	12.6852	3.81636	12.0734	15.8168	19.7482
26335.2		0.436123	0.060476	0.036402	0.012618	0.437867	0.0165	0.426379	12.4543	3.84416	12.4437	17.3174	22.1565
26375.4		0.443092	0.064168	0.037796	0.013133	0.429212	0.0126	0.551229	11.7481	4.1419	11.8233	16.3064	20.923
26435.7		0.4537	0.058907	0.035478	0.012942	0.424693	0.0143	0.599345	10.9269	4.21657	12.3067	16.8199	20.7121
26486		0.432368	0.058203	0.040077	0.014734	0.43902	0.0156	0.576833	16.0943	4.66543	13.9575	17.9921	23.3977
26536.2		0.420083	0.061848	0.037251	0.013058	0.453487	0.0143	0.349535	14.5417	3.7296	12.7669	17.264	21.9149
26586.4		0.409817	0.060084	0.037354	0.014964	0.459698	0.0181	0.397853	17.781	4.21825	14.1743	17.8071	22.0667
26616.6		0.418057	0.060875	0.037405	0.014595	0.454729	0.0143	0.451894	16.4923	4.19234	13.1611	17.3092	21.6923

## Sheet: Thomas et al. 2014
ODP Site 1146 (Thomas et al. 2014) doi:10.1130/G36289.1
19.45°N, 116.27°E
								OPTIMAL Op3			BAYSPAR SST (ºC)
Age_CaballeroGill2012	2012 Uk SST	GDGT.0	GDGT.1	GDGT.2	GDGT.3	Crenarchaeol	Cren'	D_nearest	SST (ºC)	StDev on SST	5%tile	50%tile	95%tile
66.9545	22.9224	0.274108	0.068032	0.065852	0.011295	0.548877	0.031836	0.242009	21.5319	3.26643	20.7859	24.2269	27.6654
67.774	23.1461	0.267506	0.063254	0.06409	0.010784	0.562878	0.031488	0.297427	21.211	3.2895	21.8363	24.9078	27.6064
68.7574	23.0702	0.271163	0.069377	0.070531	0.012563	0.540884	0.035482	0.20103	23.4455	3.24444	21.9247	24.7215	28.5021
68.7574	23.0702	0.269782	0.068226	0.068226	0.012062	0.548483	0.033221	0.248626	22.5926	3.25563	21.1633	24.5345	28.3996
69.595	23.3086	0.262354	0.067638	0.071942	0.012072	0.551354	0.034639	0.205086	23.5637	3.24983	21.8896	25.1631	28.1582
70.5603	23.8577	0.265104	0.067614	0.070532	0.012307	0.549664	0.03478	0.232879	23.4208	3.24978	21.9831	24.9529	28.2784
71.4585	24.4595	0.252985	0.072357	0.071119	0.01203	0.552853	0.038655	0.28582	23.4245	3.31157	21.2901	24.5337	27.9908
72.5725	23.5814	0.266716	0.078446	0.072447	0.030502	0.51682	0.03507	1.92788	18.8251	8.46011	21.5311	25.0768	28.3068
72.5725	23.5814	0.277825	0.090781	0.093522	0.017848	0.465897	0.054126	0.328227	26.0453	4.09801	22.4925	25.2128	28.7269
73.5702	23.6216	0.274912	0.068854	0.068098	0.011324	0.547303	0.029509	0.238528	21.6788	3.26362	20.1523	24.1283	27.0208
74.852	24.8029	0.254254	0.066686	0.074269	0.012869	0.550884	0.041038	0.221012	25.1798	3.2438	23.1671	25.8997	29.5076
75.6047	24.4636	0.253247	0.06511	0.070506	0.012195	0.561171	0.037771	0.300661	24.0833	3.25924	22.1273	25.7506	28.5307
76.4302	23.6384	0.266102	0.070828	0.075462	0.013371	0.536837	0.0374	0.159798	24.793	3.24488	22.0924	25.2464	28.2842
77.3044	24.3878	0.256121	0.074128	0.080221	0.013201	0.532551	0.043778	0.105347	25.4102	3.25928	22.1918	25.7099	29.4458
78.0328	24.4847	0.248535	0.067995	0.073857	0.012016	0.556858	0.040739	0.2485	24.6144	3.25402	21.8242	25.7011	28.687
78.8583	25.0672	0.247378	0.06697	0.072437	0.011856	0.560358	0.041002	0.261064	24.4919	3.25912	21.8509	25.5268	28.8583
79.865	25.5263	0.246563	0.072987	0.079206	0.013092	0.54113	0.047022	0.207501	25.5603	3.26738	22.8661	25.7148	29.3655
80.7756	25.6791	0.240258	0.069115	0.076356	0.013099	0.554897	0.046274	0.188582	25.7626	3.26079	22.7748	26.0209	29.7187
81.8075	25.7817	0.233988	0.064958	0.072292	0.012014	0.572746	0.044004	0.249798	25.3854	3.26801	23.384	26.3613	29.2668
83.7501	24.5045	0.253001	0.066475	0.069451	0.011311	0.563052	0.03671	0.294435	23.2582	3.27748	21.8156	25.1102	27.9686
84.6402	24.0092	0.263905	0.064978	0.064091	0.010689	0.563293	0.033044	0.338127	21.4047	3.30286	20.9398	24.1695	27.3956
85.4918	23.9472	0.263038	0.067172	0.068912	0.011978	0.552162	0.036738	0.245451	23.1978	3.257	22.0547	25.002	28.3385
86.2445	23.2586	0.274327	0.068668	0.068237	0.011473	0.544341	0.032954	0.22058	22.1532	3.25169	20.6566	24.275	27.9011
87.07	23.28	0.286164	0.079411	0.078695	0.013807	0.504364	0.037559	0.206348	24.8887	3.3032	21.3717	24.3683	27.2528
87.1751	23.316	0.281136	0.06867	0.068377	0.011328	0.539969	0.03052	0.184257	21.7855	3.24579	20.7881	24.3648	27.6052
88.1005	23.97	0.264987	0.070471	0.074504	0.012443	0.541495	0.0361	0.169952	24.0877	3.24358	21.6308	25.1608	28.0157
88.1005	23.97	0.264545	0.071123	0.074376	0.012295	0.542099	0.035562	0.201471	23.8774	3.24913	21.6843	25.3226	28.133
88.2522	24.1207	0.264602	0.071149	0.073697	0.012152	0.542924	0.035476	0.191186	23.6779	3.25196	21.3496	24.6863	27.9032
89.011	24.7202	0.253643	0.068633	0.071617	0.012036	0.55702	0.037052	0.265662	23.7619	3.26856	21.3002	24.8199	27.9696
90.043	24.9867	0.251088	0.066343	0.072102	0.011541	0.559766	0.039161	0.259365	24.0878	3.25582	22.9027	25.5408	28.7407
90.043	24.9867	0.249665	0.065842	0.071205	0.01147	0.563087	0.038731	0.285664	23.9598	3.26314	21.9578	25.5896	28.4201
91.1357	24.8063	0.262938	0.079104	0.078547	0.012367	0.52699	0.040053	0.277327	24.053	3.31384	21.5078	24.8756	27.2842
91.1357	24.8063	0.259115	0.077428	0.076815	0.012143	0.533562	0.040937	0.244619	23.9672	3.31035	21.4886	24.3847	27.9903
92.0156	24.9539	0.263636	0.071197	0.077196	0.012077	0.535165	0.040729	0.162619	24.7057	3.23233	21.9469	25.3424	28.5536
92.9871	25.2098	0.261717	0.072538	0.078838	0.0121	0.533127	0.041681	0.141237	24.906	3.23677	21.9975	25.4464	28.955
94.11	25.1113	0.251902	0.069273	0.076896	0.012777	0.546892	0.04226	0.209704	25.3373	3.24093	22.703	25.6028	28.7033
94.9899	25.1325	0.267777	0.073044	0.078251	0.011901	0.531092	0.037935	0.117658	24.3998	3.23853	21.5587	25.1583	28.1845
96.1436	24.9114	0.258093	0.079001	0.088374	0.01416	0.508821	0.051552	0.23684	26.2458	3.37303	22.7135	25.9816	29.0276
97.1449	24.892	0.247069	0.070678	0.078373	0.012131	0.546791	0.044958	0.18743	25.345	3.24418	23.0541	25.847	28.6631
98.025	25.528	0.257496	0.0712	0.078977	0.013566	0.539186	0.039575	0.152933	25.5063	3.25249	22.603	25.3284	28.4384
98.6079	25.7947	0.239657	0.067613	0.07665	0.011916	0.558977	0.045187	0.195019	25.5539	3.24366	22.6577	26.073	28.8152
99.4768	25.7122	0.255162	0.071198	0.079155	0.012004	0.540503	0.041978	0.112492	25.0624	3.23632	22.6839	25.5382	28.6631
100.755	26.0326	0.239234	0.068548	0.07675	0.012987	0.55561	0.04687	0.209668	25.9228	3.25407	23.0098	26.4339	29.3978
102.009	25.9631	0.242777	0.06589	0.072478	0.012468	0.562595	0.043791	0.258002	25.2199	3.25911	22.85	26.1116	29.3116
103.385	25.6775	0.232786	0.067168	0.075142	0.012115	0.567398	0.045392	0.21493	25.6304	3.26191	23.0447	26.6137	29.2054
104.775	24.6239	0.261166	0.073429	0.079359	0.013248	0.52864	0.044158	0.118769	25.5261	3.24914	22.2913	25.767	29.1549
105.875	24.8596	0.270528	0.070121	0.071419	0.0116	0.541055	0.035277	0.151419	23.0093	3.24647	21.4504	24.362	27.7153
107.164	25.3592	0.243395	0.067935	0.074405	0.012016	0.557652	0.044597	0.210336	25.1357	3.25422	22.4461	25.9945	29.0981
108.291	25.4656	0.249377	0.071338	0.076039	0.012305	0.547811	0.04313	0.245246	24.8333	3.26084	22.1897	25.5856	28.5445
109.31	25.4159	0.244846	0.066411	0.075169	0.012224	0.558292	0.043058	0.20675	25.3517	3.24229	22.7892	25.8907	29.165
110.626	24.176	0.273745	0.073401	0.077427	0.01197	0.527361	0.036097	0.126963	24.1682	3.23802	21.1336	24.7834	28.2239
112.243	24.2166	0.273661	0.070725	0.072502	0.011799	0.534883	0.036429	0.145538	23.3875	3.23764	21.9647	24.7267	27.9948
114.294	25.1587	0.265102	0.073289	0.077297	0.011566	0.530776	0.04197	0.135353	24.413	3.24662	22.2061	25.2896	28.2728
116.553	25.4784	0.258724	0.067518	0.073921	0.011088	0.547132	0.041617	0.169698	24.0662	3.2408	23.0653	25.5357	28.432
118.322	25.6514	0.258322	0.075079	0.082587	0.012394	0.525552	0.046065	0.204371	25.5026	3.2515	22.6694	25.9012	29.0781
119.645	26.4028	0.239898	0.063809	0.072461	0.011798	0.567299	0.044735	0.235297	25.3531	3.25227	23.22	26.354	29.4067
120.369	26.719	0.245546	0.068417	0.075972	0.011941	0.551953	0.046171	0.187551	25.3651	3.24302	22.2864	26.1717	29.5074
121.012	27.0103	0.237539	0.068452	0.077009	0.011788	0.556811	0.048402	0.16855	25.7479	3.24872	23.6665	26.1212	29.0962
122.273	27.5525	0.22573	0.0696	0.08311	0.012774	0.552354	0.056432	0.123738	26.9673	3.25906	24.1761	27.295	30.1802
123.104	27.4969	0.20562	0.065113	0.085675	0.014051	0.567169	0.062371	0.333216	28.2346	3.37992	24.6695	28.244	31.3159
123.923	27.4433	0.210882	0.071421	0.088431	0.015717	0.544116	0.069432	0.413988	28.0061	3.61205	24.6028	28.0766	31.4043
124.736	27.347	0.202441	0.065267	0.081526	0.013901	0.577095	0.059771	0.310439	27.8756	3.35097	24.5896	27.5797	31.1933
125.534	27.3649	0.198208	0.062846	0.079122	0.013633	0.588178	0.058012	0.198232	27.9867	3.32613	25.0731	27.9439	30.7039
126.062	27.2523	0.207459	0.066499	0.081348	0.014785	0.572449	0.05746	0.319835	27.8421	3.38364	23.7754	27.663	31.1647
126.681	26.8783	0.211935	0.064648	0.075931	0.012899	0.582441	0.052145	0.152134	27.0361	3.28094	24.0234	27.0699	29.7584
127.406	25.8682	0.226537	0.072983	0.082803	0.013838	0.551278	0.052561	0.235401	26.3079	3.33566	23.5688	26.5877	29.4221
128.066	25.86	0.226245	0.069829	0.07897	0.012747	0.563709	0.048499	0.180752	26.0588	3.27798	23.6648	26.3518	29.4067
128.066	25.86	0.225578	0.068774	0.077638	0.01241	0.568529	0.047072	0.186161	25.9527	3.27501	22.7369	26.421	29.8649
129.057	25.1928	0.255898	0.073962	0.08206	0.012309	0.533931	0.04184	0.167271	25.2087	3.2496	22.2839	25.5403	29.0494
130.226	24.5742	0.265526	0.073736	0.076792	0.011633	0.534872	0.037441	0.124709	23.9432	3.2545	21.0639	24.8542	27.6874
131.22	24.3342	0.230048	0.064443	0.067687	0.011237	0.581018	0.045567	0.313988	24.8846	3.32838	23.2365	26.0529	28.9762
131.22	24.3342	0.228484	0.063976	0.06626	0.011043	0.584539	0.045697	0.313667	24.7731	3.35228	22.3316	26.0248	29.3327
132.128	23.633	0.274736	0.075057	0.073924	0.011707	0.528701	0.035876	0.178386	23.3	3.26338	20.4212	24.2028	27.2774
132.128	23.633	0.275201	0.072847	0.072723	0.011394	0.532968	0.034867	0.151919	22.9578	3.25126	20.8065	23.9922	27.413
132.99	23.6325	0.269894	0.07409	0.074003	0.012711	0.532823	0.036479	0.211472	23.7999	3.26118	21.0835	24.5705	27.3274
132.99	23.7117	0.267577	0.069139	0.071294	0.012122	0.545928	0.033941	0.205844	23.2317	3.24891	21.1983	24.9223	27.8309
132.99	23.7117	0.267123	0.07053	0.069358	0.01188	0.548305	0.032805	0.236835	22.5292	3.27163	20.6303	24.2599	27.8636
133.81	23.0167	0.284427	0.081555	0.072628	0.012416	0.515297	0.033677	0.252507	22.7696	3.35014	20.3106	23.2288	26.2122
135.468	22.8601	0.279783	0.072178	0.069648	0.011682	0.534266	0.032443	0.232459	22.3215	3.25325	20.5287	24.0404	26.9956
137.153	23.0275	0.278889	0.072722	0.071353	0.012103	0.532519	0.032414	0.241294	22.8475	3.25013	20.1038	23.964	26.5107
137.153	23.0275	0.276457	0.070611	0.070435	0.011974	0.538827	0.031696	0.209419	22.6397	3.24752	21.212	24.1163	27.7734
138.488	23.1187	0.277862	0.080623	0.072417	0.012223	0.52405	0.032825	0.294536	22.529	3.35135	19.8397	23.142	25.8429
139.156	23.2263	0.280262	0.073938	0.073698	0.012616	0.525391	0.034095	0.185749	23.665	3.24689	20.9633	24.2032	27.2272
139.156	23.2263	0.277931	0.073645	0.072939	0.01257	0.529056	0.03386	0.206334	23.453	3.25042	20.8341	24.2933	26.9322
139.895	24.1547	0.281904	0.08409	0.08446	0.015744	0.488979	0.044823	0.218157	25.6876	3.50414	21.4059	24.6752	28.122
140.914	23.4502	0.264021	0.067037	0.067655	0.011778	0.556919	0.03259	0.261261	22.4397	3.26982	21.1678	24.5633	28.1652
140.914	23.4248	0.270385	0.072527	0.073587	0.013042	0.533347	0.037112	0.190952	24.1022	3.2503	21.5229	24.88	27.7188
141.223	23.5405	0.276334	0.068261	0.070235	0.0126	0.539509	0.033061	0.19724	23.2755	3.24017	21.0854	24.5173	27.6906
141.533	23.5479	0.269817	0.070032	0.070392	0.012112	0.543231	0.034417	0.223212	23.0188	3.25152	20.9474	24.6523	27.663
142.716	23.5186	0.272348	0.07207	0.07346	0.012598	0.534507	0.035016	0.174962	23.7522	3.24535	21.3273	24.5658	27.6128
142.716	23.5186	0.271863	0.071214	0.071936	0.01227	0.537712	0.035005	0.220336	23.3622	3.24633	20.7587	24.4751	27.7052
143.463	23.0199	0.2958	0.064024	0.056202	0.016631	0.536383	0.03096	0.422407	22.1229	3.53656	20.8598	24.1285	27.0413
143.463	23.0199	0.287913	0.086745	0.082695	0.015425	0.482668	0.044554	0.244279	25.0773	3.59338	20.9189	24.2159	27.0059
143.536	23.29	0.27577	0.068273	0.066934	0.011513	0.546185	0.031325	0.215181	21.7728	3.25624	20.179	24.2041	27.264
143.536	23.29	0.279816	0.068514	0.067301	0.011429	0.542654	0.030286	0.179635	21.6395	3.25086	21.061	23.9538	27.0322
144.556	23.1128	0.272565	0.068535	0.067275	0.01199	0.546706	0.032928	0.263178	22.2928	3.25649	21.2767	24.4488	27.2802
145.375	23.2604	0.265285	0.063598	0.061841	0.011841	0.565706	0.031729	0.336563	21.5845	3.29215	21.1536	24.5098	27.6578
147.196	22.8403	0.276519	0.065801	0.064009	0.011445	0.553038	0.029188	0.224245	21.0768	3.26719	20.5862	24.3416	27.7903
148.309	23.1849	0.262729	0.067375	0.067858	0.011944	0.556084	0.03401	0.271331	22.7056	3.26915	21.2293	24.8914	27.6558
149.356	22.9521	0.275655	0.07222	0.06389	0.011593	0.547875	0.028768	0.250925	20.8103	3.31658	19.7712	22.9313	26.1055
150.631	22.8924	0.294737	0.075228	0.065404	0.012604	0.524912	0.027116	0.280737	21.3756	3.27824	19.6151	22.9364	26.0498
150.631	22.8924	0.294607	0.097166	0.093323	0.01828	0.448316	0.048308	0.376082	24.8886	4.61222	21.6768	24.5324	27.4476
150.631	22.8924	0.290997	0.071796	0.065443	0.012517	0.5318	0.027448	0.249371	21.5244	3.25421	19.9256	23.2538	26.4397
151.655	22.8578	0.277308	0.066275	0.061566	0.011807	0.552872	0.030172	0.249772	20.9433	3.27317	20.6171	23.9688	26.9934
152.627	22.5643	0.281313	0.071445	0.067649	0.012391	0.534718	0.032485	0.266024	22.3381	3.25223	20.8541	24.3084	26.9468
153.645	22.8101	0.284562	0.072586	0.06863	0.011793	0.532603	0.029826	0.195029	21.9326	3.2557	20.8021	23.6616	26.6126
154.447	22.5768	0.29003	0.07033	0.066623	0.01149	0.532802	0.028725	0.100056	21.3454	3.24556	20.1468	23.5369	26.634
155.455	22.41	0.280773	0.069232	0.065257	0.011782	0.542315	0.030641	0.171727	21.4695	3.2567	20.7362	23.9038	26.9914
155.538	22.3433	0.282411	0.069132	0.065308	0.011855	0.541288	0.030006	0.160813	21.4601	3.25316	20.3672	23.8663	26.7205
156.011	22.7878	0.282764	0.070845	0.067464	0.011556	0.536329	0.031043	0.166297	21.7413	3.25177	19.9444	23.8307	27.3217
156.67	22.7443	0.277327	0.070846	0.070967	0.011795	0.536488	0.032577	0.189088	22.7161	3.24372	21.0664	24.3207	27.0305
158.177	23.018	0.272363	0.067278	0.066058	0.011565	0.552857	0.029879	0.250361	21.5863	3.26819	20.5184	23.9353	27.2734
159.83	23.9184	0.273813	0.072022	0.073968	0.011679	0.534648	0.03387	0.114307	23.2797	3.24366	21.2012	24.5547	27.709
160.904	23.5913	0.277039	0.076093	0.077571	0.012633	0.520095	0.036569	0.243854	24.3594	3.2553	21.3965	24.7189	27.3776
162.038	23.1011	0.281545	0.067983	0.066953	0.011159	0.540773	0.031588	0.187058	21.5281	3.24698	20.6082	24.2015	27.5872
162.038	23.1011	0.280142	0.06819	0.065801	0.011032	0.542912	0.031923	0.192159	21.2871	3.25657	20.612	24.0196	27.0382
162.882	24.0158	0.268909	0.071595	0.073822	0.011887	0.537819	0.035969	0.134708	23.5774	3.24527	21.4778	25.0029	27.553
163.884	23.5673	0.271916	0.07262	0.072945	0.011984	0.535691	0.034844	0.176137	23.2895	3.25204	21.129	24.6364	28.0093
164.712	23.1067	0.278782	0.068611	0.068932	0.011248	0.541496	0.030931	0.215926	21.8937	3.24746	21.3625	24.1347	27.226
165.42	23.3371	0.274677	0.073631	0.075315	0.011962	0.528088	0.036328	0.156175	23.804	3.2433	20.3462	24.7879	28.0992
165.785	23.6686	0.271348	0.070901	0.075569	0.012157	0.53297	0.037055	0.160313	24.198	3.23116	22.2047	25.0187	27.9456
167.377	24.1183	0.262945	0.068178	0.074752	0.011889	0.542794	0.039442	0.139798	24.3546	3.23102	22.2776	25.5352	28.6125
168.542	23.5259	0.278656	0.067787	0.071542	0.012253	0.535573	0.03419	0.199618	23.4664	3.233	22.093	24.6021	27.5559
169.198	23.3542	0.281082	0.078078	0.072108	0.011804	0.523584	0.033344	0.231642	22.6651	3.29972	20.0204	23.4264	26.7785
169.198	23.3542	0.27875	0.076959	0.070748	0.011498	0.528716	0.033329	0.223036	22.3253	3.30227	19.3288	23.2057	26.8919
170.363	23.66	0.269238	0.069289	0.073248	0.011542	0.540455	0.036228	0.095279	23.4498	3.23632	21.5641	24.605	27.797
170.436	23.887	0.269473	0.071574	0.074283	0.011934	0.534668	0.038068	0.13954	23.88	3.23973	21.5623	24.8444	27.9628
172.343	23.238	0.278267	0.069943	0.06889	0.011777	0.538484	0.03264	0.216561	22.3481	3.24547	21.177	24.2388	27.3257
173.091	23.1333	0.287632	0.069815	0.06941	0.011924	0.528	0.033219	0.171932	22.649	3.23195	21.5877	24.547	27.5376
173.752	23.4915	0.279445	0.072045	0.073791	0.012444	0.526143	0.036131	0.196455	23.9267	3.23417	21.7451	24.7583	28.1997
174.525	23.5616	0.275095	0.077476	0.073546	0.012239	0.526611	0.035033	0.277925	23.1601	3.29355	20.5732	23.9475	27.0242
175.212	23.4537	0.287537	0.070174	0.069064	0.011464	0.529771	0.03199	0.151125	22.1261	3.23504	21.2542	24.157	27.3544
176.108	24.0514	0.269353	0.068039	0.071153	0.012113	0.543377	0.035966	0.190062	23.4739	3.23933	21.9775	24.9413	27.8937
176.934	24.8543	0.253206	0.069982	0.074181	0.012368	0.548402	0.041862	0.268697	24.6132	3.25477	22.174	25.5087	28.968
178.021	24.7709	0.262022	0.072441	0.076552	0.012844	0.53432	0.041821	0.208672	24.8884	3.24677	22.1092	25.463	28.0987
179.032	24.2962	0.269909	0.069799	0.072159	0.011489	0.541391	0.035253	0.126765	23.0998	3.24341	21.521	24.9045	28.0214
180.358	23.97	0.27683	0.067946	0.06676	0.010474	0.545945	0.032045	0.260937	21.1762	3.26926	20.4727	24.1932	27.5323
180.519	24.123	0.278116	0.069529	0.070101	0.011163	0.537184	0.033907	0.179696	22.3353	3.24116	21.6066	24.4187	28.1467
181.814	24.2137	0.268721	0.073962	0.079081	0.012131	0.528484	0.037621	0.168059	24.5401	3.24242	21.6154	24.9303	27.84
183.028	24.2138	0.266505	0.069762	0.076032	0.011385	0.538888	0.037428	0.058901	23.9356	3.23233	21.9955	25.1085	28.1421
184.403	24.2465	0.257625	0.067857	0.075907	0.011363	0.549754	0.037494	0.146414	24.1434	3.24026	22.556	25.651	28.3231
185.86	24.3194	0.263661	0.071328	0.078334	0.0114	0.538148	0.037129	0.108353	24.2071	3.23896	22.3062	25.602	28.6737
187.075	24.2949	0.26467	0.071234	0.08046	0.012099	0.532365	0.039171	0.127526	25.0691	3.22971	22.0446	25.2364	28.4094
188.413	25.0304	0.268336	0.067193	0.074174	0.011301	0.541036	0.03796	0.101189	23.7178	3.22985	21.8012	25.4416	28.7804
188.413	25.0304	0.267833	0.067481	0.073453	0.011078	0.54343	0.036726	0.090371	23.3219	3.23579	22.421	25.1523	28.161
189.725	26.1927	0.258223	0.069987	0.078001	0.011807	0.537816	0.044165	0.116657	25.1121	3.22849	22.2939	26.011	29.1255
190.366	25.3793	0.280007	0.077189	0.083816	0.012227	0.509614	0.037148	0.167099	25.2002	3.26397	21.4675	24.8908	28.0488
191.308	24.7649	0.279601	0.068865	0.071454	0.010524	0.535902	0.033656	0.113453	22.1151	3.24027	21.0821	24.5542	27.5642
192.13	25.4883	0.2582	0.069024	0.074648	0.011172	0.547077	0.03988	0.165856	23.9909	3.24531	22.2231	24.9906	27.8667
192.912	25.0516	0.265412	0.070721	0.075256	0.011927	0.535864	0.04082	0.139041	24.3644	3.23525	21.8748	25.273	28.5136
194.029	25.7513	0.251132	0.066504	0.074105	0.011939	0.557368	0.038952	0.25299	24.5592	3.2464	22.4513	25.7344	29.0325
195.364	25.9942	0.225489	0.069111	0.080825	0.013764	0.55933	0.051482	0.16042	26.8154	3.2884	23.882	26.8051	29.9264
196.391	25.787	0.223144	0.065698	0.076072	0.012448	0.573997	0.04864	0.138149	26.4443	3.25933	23.4665	26.3474	29.7622
197.293	25.8795	0.239943	0.07246	0.082368	0.012892	0.546735	0.045601	0.190641	25.7808	3.26557	22.857	26.1036	29.9457
198.888	25.0119	0.251089	0.070505	0.079983	0.012105	0.542087	0.044232	0.133458	25.4845	3.23227	22.0677	25.7892	29.5394
199.802	24.5156	0.262531	0.07336	0.079504	0.011879	0.530647	0.042079	0.112413	24.8615	3.23987	22.8686	25.5325	28.4174
200.809	24.2894	0.275146	0.075086	0.080125	0.012397	0.514009	0.043237	0.223904	25.2773	3.2428	22.5324	25.5103	28.206
202.428	24.8977	0.255453	0.069552	0.077709	0.011463	0.543105	0.042719	0.141929	24.8386	3.23338	22.4817	25.7864	28.5677
203.44	25.1919	0.251015	0.070137	0.078996	0.011443	0.543866	0.044543	0.130418	25.1553	3.23712	23.4797	25.8625	29.1432
204.552	24.6054	0.257485	0.071436	0.077717	0.01245	0.536951	0.043961	0.216014	25.1902	3.23829	22.2515	25.9977	28.4865
205.564	24.7314	0.259306	0.072882	0.079019	0.011876	0.532421	0.044496	0.10748	25.0234	3.24223	22.3606	25.6248	28.468
206.575	25.3271	0.256073	0.073591	0.082566	0.012026	0.528898	0.046847	0.118934	25.5961	3.24125	22.6335	25.5859	29.0205
207.82	25.4779	0.251006	0.068139	0.07733	0.011188	0.548284	0.044053	0.204218	24.9562	3.2359	23.2387	26.2412	29.1126
209.631	25.7533	0.251041	0.071101	0.080171	0.01171	0.537713	0.048265	0.099987	25.6021	3.23695	22.5932	26.1015	29.1421
210.617	25.946	0.258081	0.075191	0.083876	0.011601	0.527328	0.043923	0.133372	25.213	3.25629	22.1894	25.4697	28.1555
211.907	26.1046	0.242163	0.070447	0.078813	0.011316	0.548168	0.049093	0.217638	25.5496	3.25713	23.0922	26.1605	29.9317
213.197	26.2182	0.239121	0.071821	0.08365	0.012759	0.540769	0.05188	0.137373	26.4072	3.25023	22.9849	26.3553	29.3917
214.639	26.3542	0.228508	0.066156	0.080332	0.011375	0.563675	0.049954	0.117572	26.518	3.23486	23.9358	26.7551	30.183
215.498	26.4075	0.221387	0.070192	0.08701	0.012511	0.552609	0.056291	0.1923	26.9305	3.28485	24.0776	27.2873	30.43
216.519	26.3682	0.213115	0.070113	0.088272	0.013241	0.556116	0.059142	0.211205	27.1445	3.35821	24.8774	27.6572	30.7525
217.177	26.0875	0.210303	0.063172	0.07866	0.012064	0.582817	0.052983	0.081051	27.437	3.24468	24.5836	27.4476	30.5725
218.038	25.7859	0.218697	0.065985	0.082598	0.012202	0.567862	0.052656	0.134451	27.185	3.24236	23.374	26.9955	30.8166
218.847	25.2073	0.217991	0.06693	0.082428	0.012398	0.567117	0.053135	0.117529	27.0907	3.24989	24.0199	27.1664	30.6656
219.753	24.7766	0.224392	0.065863	0.077706	0.012258	0.569292	0.050488	0.118482	26.6629	3.24368	23.1021	26.8718	29.6845
220.349	23.9787	0.241165	0.071698	0.08343	0.012528	0.542295	0.048885	0.152329	26.1502	3.24466	23.0883	26.523	29.5724
221.307	23.239	0.258387	0.073429	0.078392	0.011708	0.537211	0.040875	0.121522	24.5202	3.25386	21.9977	25.2857	28.2913
221.307	23.239	0.256529	0.071966	0.078336	0.011587	0.542327	0.039254	0.119719	24.4688	3.24928	21.4672	25.2889	28.6937
222.478	23.0906	0.268381	0.073386	0.076181	0.012441	0.529774	0.039838	0.214292	24.4395	3.24519	21.1257	24.7827	27.7657
223.124	23.3278	0.264471	0.070974	0.075307	0.012043	0.537908	0.039297	0.159514	24.2737	3.23817	21.735	25.4529	28.5222
223.124	23.3278	0.265299	0.069889	0.075036	0.011661	0.540498	0.037617	0.083447	23.9536	3.23564	21.7937	25.147	27.8587
223.631	23.2227	0.277429	0.078949	0.084114	0.012617	0.50985	0.03704	0.112184	25.1177	3.28731	21.4644	24.7228	28.4724
224.025	23.3098	0.269784	0.070798	0.075049	0.011936	0.534663	0.03777	0.123112	24.0483	3.23265	21.8019	24.924	27.8441
224.509	23.0827	0.263533	0.072056	0.077635	0.012346	0.533001	0.041429	0.206843	24.8756	3.23571	22.2338	25.2444	28.1522
224.817	22.9218	0.263436	0.068167	0.069416	0.011441	0.550909	0.036631	0.223059	22.9107	3.2614	22.0357	25.173	27.9976
225.205	23.1732	0.282331	0.066546	0.068014	0.011939	0.543133	0.028037	0.177699	21.9645	3.25177	20.8338	24.1582	27.5641
225.523	22.9245	0.273905	0.073238	0.077361	0.012664	0.525231	0.037601	0.190115	24.6502	3.23699	21.3766	24.9693	28.284
225.932	22.8114	0.274145	0.074788	0.076852	0.012159	0.52535	0.036706	0.186239	24.1092	3.24768	21.3481	24.7932	27.4867
226.255	22.9586	0.269818	0.074318	0.074792	0.011771	0.533325	0.035976	0.151245	23.5055	3.26165	21.0085	24.2293	27.5718
226.66	23.5679	0.260129	0.075467	0.083477	0.013028	0.527004	0.040895	0.086913	25.4135	3.26488	21.9296	25.4758	28.2492
226.923	23.3868	0.271328	0.073965	0.077434	0.011943	0.527789	0.03754	0.134234	24.2126	3.2424	21.1664	24.7594	28.0316
227.348	23.1886	0.271216	0.069431	0.074313	0.011147	0.53972	0.034173	0.103899	23.1638	3.23837	21.4642	25.1205	28.4707
228.329	24.1774	0.255971	0.070768	0.079803	0.0115	0.543939	0.038019	0.098096	24.6242	3.24432	22.4846	25.0258	28.0808
229.736	24.2259	0.254071	0.073926	0.080201	0.012336	0.537223	0.042243	0.181055	25.006	3.25588	22.6164	25.5902	28.5056
231.416	24.5726	0.263788	0.074513	0.084847	0.01251	0.521593	0.04275	0.137153	25.7228	3.24635	22.7495	25.8055	29.1408
232.346	24.7275	0.255109	0.07314	0.08386	0.011453	0.534643	0.041794	0.110355	25.1779	3.24933	22.3924	25.7143	29.1377
234.963	25.1923	0.25724	0.070036	0.079827	0.012032	0.536055	0.04481	0.100617	25.5244	3.22389	22.3202	26.2183	29.4651
237.054	25.2927	0.259204	0.073747	0.083955	0.012846	0.522996	0.047253	0.159856	26.1042	3.24302	23.2116	25.928	29.0283
238.665	25.6793	0.244248	0.067611	0.08	0.011858	0.550442	0.045841	0.153853	25.9034	3.22657	23.6644	26.7581	29.9755
239.681	25.9227	0.236728	0.075174	0.090115	0.013867	0.527618	0.056497	0.173283	26.6915	3.37494	23.8931	27.0559	29.6603
240.837	26.27	0.215633	0.063661	0.078499	0.01278	0.576776	0.052652	0.145803	27.4055	3.25221	24.5998	27.4502	30.998
240.837	26.27	0.215392	0.063309	0.076749	0.01252	0.580038	0.051991	0.098731	27.2252	3.25182	23.9472	27.2932	30.4744
240.837	26.27	0.212338	0.06227	0.076581	0.01257	0.584026	0.052214	0.075279	27.4185	3.25496	24.8593	27.3275	30.7921
240.837	26.3958	0.213915	0.064389	0.077982	0.012699	0.579503	0.051511	0.121371	27.1675	3.25947	24.2682	27.1164	30.2072
242.094	26.0407	0.243927	0.072585	0.077029	0.022615	0.538218	0.045625	0.76632	25.0322	5.17047	22.7984	26.2817	29.3758
242.094	26.0407	0.215119	0.062718	0.076655	0.012877	0.58173	0.050901	0.140211	27.2981	3.26195	23.5789	27.3923	30.5593
242.094	26.0407	0.225374	0.06355	0.075671	0.014643	0.576539	0.044223	0.219808	27.0164	3.32708	23.8529	26.8363	30.1427
243.535	26.6153	0.203015	0.060047	0.072301	0.012704	0.600466	0.051468	0.186483	27.4214	3.28934	24.3448	27.6962	30.5074
244.546	24.7818	0.242442	0.070638	0.07812	0.01317	0.549237	0.046393	0.201522	25.7749	3.25971	22.5092	26.0583	28.8929
245.441	24.5396	0.261178	0.076943	0.08079	0.013593	0.525776	0.04172	0.115628	25.1023	3.28918	21.692	25.2613	28.3194
246.435	23.5975	0.279755	0.071789	0.071937	0.012123	0.529907	0.034488	0.229642	23.2417	3.23825	21.0165	24.6081	27.2515
246.435	23.5975	0.280844	0.072632	0.070695	0.012041	0.529408	0.034379	0.253016	22.89	3.24662	20.7131	24.0758	27.4878
247.397	23.9198	0.266757	0.071626	0.074132	0.012557	0.537936	0.036992	0.175446	24.0443	3.24639	21.5979	25.0632	28.2708
248.632	23.1722	0.286491	0.099184	0.098277	0.018132	0.446056	0.051859	0.389637	24.9795	4.76058	21.389	24.5727	27.5484
249.336	22.8668	0.292615	0.093637	0.094435	0.01761	0.452224	0.049479	0.213767	25.4453	4.17438	21.5531	24.7327	27.5584
250.507	23.2146	0.27611	0.07524	0.068544	0.011735	0.536343	0.032029	0.284168	21.9109	3.30369	19.725	23.2615	26.534
251.826	22.973	0.274425	0.070531	0.068296	0.011946	0.542641	0.032161	0.251815	22.2505	3.25949	20.5108	24.046	26.8681
253.04	24.5117	0.269803	0.069511	0.069378	0.011696	0.543594	0.036018	0.205863	22.7986	3.25419	21.292	24.6295	27.6046
254.133	23.4173	0.271967	0.069351	0.070293	0.012029	0.540795	0.035565	0.202391	23.11	3.24346	21.287	24.9603	27.8031
254.861	23.4503	0.275817	0.069255	0.069496	0.011876	0.538386	0.03517	0.201566	22.8192	3.24114	21.2771	24.5573	27.2718
255.552	23.5717	0.265338	0.075718	0.071835	0.012296	0.537147	0.037665	0.288566	23.1254	3.30858	21.0426	24.1551	27.4384
255.552	23.5717	0.284034	0.070462	0.070462	0.011161	0.531653	0.032227	0.210181	22.2022	3.23746	21.134	24.235	26.7387
257.101	23.8695	0.266367	0.073492	0.077771	0.01273	0.530595	0.039046	0.204888	24.726	3.24495	21.859	25.2051	28.044
258.678	24.1134	0.26633	0.068419	0.071978	0.012398	0.542992	0.037883	0.191045	23.9666	3.23996	21.8205	25.0074	28.1597
260.3	23.9231	0.263947	0.072436	0.079484	0.012672	0.530144	0.041317	0.187841	25.2568	3.23441	22.4861	25.6889	28.172
262.272	23.2759	0.276955	0.06908	0.069398	0.011397	0.541177	0.031993	0.198357	22.186	3.24613	20.7249	24.156	27.1392
263.866	22.7736	0.284771	0.07025	0.067798	0.01141	0.534653	0.031117	0.152879	21.7453	3.2446	20.456	24.0722	27.44
265.08	23.0494	0.278095	0.073208	0.065364	0.010981	0.541928	0.030424	0.255446	20.9696	3.31469	19.7399	23.1469	26.0129
266.066	22.8269	0.282976	0.069342	0.066283	0.01086	0.540458	0.030082	0.175992	21.0426	3.25997	20.5888	23.9173	27.3389
266.066	22.8269	0.280652	0.068584	0.065275	0.010949	0.544459	0.030081	0.189785	20.949	3.26571	19.9918	24.0242	27.0762
267.595	22.65	0.283335	0.073079	0.072589	0.011431	0.52666	0.032906	0.181618	22.7988	3.24195	20.6169	24.112	27.3102
269.051	22.7551	0.286067	0.073678	0.072443	0.011216	0.525828	0.030768	0.156216	22.4658	3.2483	20.6728	23.7245	26.6763
270.66	22.4849	0.286255	0.074525	0.074607	0.011927	0.520688	0.031998	0.182583	23.385	3.24494	20.6109	24.0338	27.1648
272.177	22.5697	0.28292	0.080676	0.075703	0.01188	0.516108	0.032713	0.269016	23.2388	3.31665	19.7497	23.2047	26.1412
273.543	22.6569	0.279463	0.074242	0.076084	0.013052	0.523608	0.033551	0.169761	24.248	3.25003	21.6361	24.4669	27.7213
274.453	21.9205	0.273539	0.068306	0.07144	0.010904	0.545198	0.030613	0.132592	22.151	3.25523	21.0572	24.6673	28.091
275.212	23.1916	0.27514	0.07028	0.07357	0.01129	0.536822	0.032897	0.111537	22.952	3.2394	21.2751	24.7168	27.5422
276.73	23.106	0.279892	0.073482	0.076188	0.011838	0.524269	0.034331	0.145174	23.7943	3.23717	20.5998	24.7257	27.3729
278.247	22.6528	0.265136	0.074739	0.070251	0.012213	0.544885	0.032777	0.290599	22.4672	3.31572	20.2368	23.8069	27.0579
278.247	22.6528	0.266957	0.066574	0.068881	0.01203	0.553688	0.03187	0.233249	22.7162	3.25791	21.2642	25.0506	27.9156
279.917	24.1839	0.271836	0.068936	0.071957	0.01233	0.543671	0.03127	0.186996	23.2189	3.24842	21.1451	24.4743	27.3068
281.634	25.1071	0.263264	0.071486	0.078473	0.011948	0.535642	0.039186	0.131213	24.6753	3.2332	22.3541	25.771	28.423
282.946	24.3262	0.258902	0.07536	0.084442	0.01187	0.528957	0.040468	0.149853	25.0934	3.26146	22.8109	25.406	28.7867
285.131	25.3848	0.256876	0.070762	0.079365	0.012238	0.536775	0.043984	0.147078	25.4127	3.22881	22.2771	26.1319	29.3937
287.535	25.09	0.244399	0.069965	0.079909	0.01234	0.546304	0.047083	0.198573	25.8794	3.23484	23.2014	26.1792	29.7442
288.384	25.22	0.242768	0.0708	0.083573	0.01328	0.53798	0.051599	0.159379	26.7633	3.24821	23.7122	26.681	29.5788
289.963	24.0826	0.267805	0.068698	0.072288	0.011353	0.543373	0.036484	0.132053	23.237	3.24074	21.454	24.8827	27.4323
290.764	23.6073	0.277005	0.071053	0.072598	0.01143	0.532386	0.035527	0.14033	23.0831	3.23621	21.8133	24.5676	27.653
292.391	23.8481	0.266344	0.06858	0.073856	0.011567	0.542982	0.036671	0.091437	23.6809	3.23549	21.2349	25.0394	28.2515
293.33	24.7457	0.264102	0.070101	0.07434	0.011629	0.542332	0.037496	0.100881	23.8038	3.24151	22.0546	25.2354	28.0126
295.272	23.27	0.272037	0.069709	0.072165	0.01141	0.540295	0.034382	0.128235	22.9559	3.2415	22.1584	24.8086	27.583
295.272	23.27	0.27117	0.070171	0.071361	0.01118	0.542341	0.033777	0.161517	22.6118	3.25235	20.6823	24.0951	26.9256
296.683	23.0806	0.273386	0.071997	0.074514	0.011832	0.533682	0.034589	0.123244	23.5297	3.24051	21.0648	24.8365	28.1184
298.301	24.1036	0.268389	0.0787	0.08879	0.013319	0.509535	0.041267	0.16731	25.8158	3.32642	22.5218	25.4065	28.4638
300.324	24.4967	0.258621	0.070858	0.080109	0.01209	0.536165	0.042157	0.104962	25.2818	3.2281	22.7295	25.8719	28.8816
300.324	24.4967	0.263484	0.071935	0.080579	0.012282	0.528363	0.043356	0.157486	25.4506	3.2271	22.672	25.8942	28.8634
300.324	24.4967	0.258491	0.071324	0.078505	0.011752	0.538522	0.041406	0.100269	24.7946	3.23577	21.8625	25.5363	28.4867
302.349	24.2947	0.261314	0.068482	0.072537	0.012187	0.547408	0.038071	0.225145	24.0002	3.24449	22.0734	25.376	28.1032
302.349	24.2947	0.261773	0.068382	0.072655	0.012207	0.547587	0.037396	0.224474	23.9726	3.24395	22.0066	25.3456	28.3983
303.261	24.6125	0.262278	0.073928	0.083216	0.012482	0.525299	0.042797	0.18401	25.5794	3.2399	22.5947	25.7055	28.546
304.88	25.2511	0.251315	0.077732	0.080655	0.012507	0.531853	0.045938	0.245583	24.7776	3.30888	22.1515	24.9864	28.0527
305.682	25.5932	0.252951	0.072618	0.082736	0.012753	0.533305	0.045637	0.178292	25.8896	3.24011	22.8707	25.8004	28.5859
307.199	25.6537	0.279662	0.088699	0.099482	0.016314	0.455668	0.060176	0.327738	26.3139	4.04451	23.1688	26.1703	29.7323
308.907	25.8725	0.258196	0.075346	0.088412	0.013301	0.515609	0.049135	0.226979	26.5003	3.28693	22.6859	26.418	29.8059
309.855	25.3382	0.239347	0.069343	0.080304	0.013198	0.551392	0.046415	0.20041	26.2543	3.25016	23.9886	26.6135	29.5105
310.804	25.5517	0.243109	0.067236	0.076086	0.01241	0.556403	0.044756	0.210024	25.6223	3.24134	23.0102	26.3045	29.142
312.474	25.8178	0.241788	0.067209	0.078274	0.012971	0.551196	0.048563	0.193984	26.4484	3.2363	22.9458	26.9686	30.2748
313.704	25.5727	0.240087	0.06654	0.076317	0.012222	0.559479	0.045356	0.189082	25.7664	3.23956	22.7316	26.3173	29.5048
313.704	25.5727	0.23811	0.06586	0.075359	0.012095	0.563612	0.044962	0.197881	25.6864	3.24441	22.4505	26.2713	28.9504
314.808	25.35	0.247671	0.069289	0.076955	0.012266	0.549888	0.043932	0.224407	25.2988	3.24151	22.8087	26.124	29.3405
315.815	26.2313	0.235011	0.067877	0.08101	0.012677	0.552967	0.050458	0.150463	26.6958	3.23284	23.7954	27.029	29.8486
317.697	25.3005	0.252294	0.068899	0.078073	0.011376	0.546789	0.042569	0.159288	24.9307	3.23433	23.2418	26.171	28.9662
318.87	25.079	0.262834	0.069903	0.078011	0.010737	0.536853	0.041662	0.162721	24.2723	3.23477	22.8547	25.6261	28.9052
321.327	25.6835	0.257212	0.0702	0.078443	0.011511	0.538582	0.044053	0.110431	25.0026	3.23112	22.8032	25.8631	29.5223
322.603	26.1462	0.252429	0.066772	0.074643	0.011454	0.551002	0.0437	0.208708	24.7728	3.23755	22.6075	25.6867	28.7197
324.97	26.5447	0.236882	0.070266	0.081977	0.012017	0.549619	0.049239	0.106175	26.1239	3.24077	22.5959	26.4486	29.9379
326.245	26.6791	0.231676	0.066945	0.07868	0.011463	0.562643	0.048592	0.143036	26.1426	3.24002	23.3577	26.917	30.0324
328.242	27.0112	0.219911	0.065433	0.082557	0.011482	0.566	0.054617	0.119048	27.2385	3.23888	23.5382	27.2332	30.3597
328.989	27.1167	0.21073	0.067434	0.087937	0.012302	0.559289	0.062308	0.190282	27.6175	3.32088	24.4793	27.9517	31.1434
328.989	27.1167	0.209115	0.065991	0.086389	0.012016	0.56564	0.060849	0.129104	27.7324	3.29278	24.6039	27.9646	31.9779
330.05	27.4175	0.2006	0.063057	0.085301	0.011897	0.577516	0.061629	0.047826	28.1455	3.3029	24.9209	27.9445	31.133
331.012	27.0693	0.198188	0.062813	0.08423	0.012738	0.57858	0.063452	0.185713	28.3094	3.32378	25.2909	28.9623	31.8736
331.012	27.0693	0.198134	0.062934	0.083767	0.012587	0.579427	0.063151	0.158138	28.2561	3.31318	25.2498	28.566	31.5192
331.352	27.0201	0.199284	0.063859	0.085879	0.012937	0.57253	0.065511	0.224348	28.2845	3.35975	25.6255	28.664	32.4727
331.594	26.67	0.187475	0.059796	0.080136	0.012143	0.601635	0.058816	0.200697	28.2728	3.29425	24.6835	28.2835	31.0264
332.461	26.5436	0.190442	0.0592	0.078687	0.012504	0.600853	0.058314	0.151267	28.3276	3.28626	25.0303	28.3838	31.4544
333.183	26.9131	0.198569	0.063699	0.082573	0.013644	0.579978	0.061537	0.258211	28.1624	3.34939	25.1185	28.3095	31.3077
333.98	25.7462	0.194763	0.060611	0.076612	0.013738	0.602069	0.052206	0.164298	27.8921	3.33099	24.5794	28.073	30.8358
333.98	25.7462	0.194537	0.059933	0.07585	0.013657	0.603262	0.052761	0.148746	27.9523	3.32438	24.8171	27.8612	30.7519
334.7	25.56	0.215054	0.064979	0.078275	0.01399	0.574633	0.05307	0.225568	27.4633	3.30327	24.6698	27.3927	30.808
335.89	25.0196	0.238854	0.070995	0.080621	0.013417	0.548102	0.048012	0.189873	26.1907	3.2639	23.4907	26.6302	29.7816
336.861	24.491	0.254686	0.071739	0.07427	0.013446	0.544175	0.041683	0.136883	24.7701	3.27249	21.6798	25.1095	28.5269
337.905	24.1017	0.272599	0.072283	0.07369	0.012311	0.532888	0.036229	0.207454	23.75	3.24318	20.8979	24.3813	28.0642
338.827	24.2007	0.273894	0.07154	0.071621	0.012019	0.53716	0.033767	0.199292	23.034	3.24818	20.5558	24.0383	27.2231
339.799	24.6601	0.276633	0.073769	0.071491	0.011608	0.532654	0.033847	0.196484	22.6935	3.26251	20.5063	24.1537	27.1965
344.224	25.3502	0.272348	0.072773	0.075262	0.012812	0.527125	0.039681	0.181482	24.5455	3.24142	21.525	24.9781	28.3494
344.224	25.3502	0.268318	0.071551	0.075507	0.012728	0.533196	0.0387	0.154349	24.5518	3.23765	22.123	25.1172	28.6258
345.842	24.0894	0.262743	0.068664	0.07024	0.012437	0.550009	0.035908	0.241798	23.4651	3.25762	22.1776	25.0747	28.0239
347.462	23.7915	0.264943	0.069415	0.07217	0.012399	0.543663	0.03741	0.19986	23.8665	3.24522	21.4178	24.9171	27.4447
349.08	23.8049	0.260264	0.075238	0.071664	0.012922	0.540689	0.039223	0.235745	23.4204	3.31856	20.628	24.5075	27.7959
350.699	24.1345	0.26118	0.067949	0.071559	0.01325	0.545717	0.040345	0.233097	24.62	3.25329	21.8888	25.3377	28.318

## Sheet: ACEX Exp. 302
IODP Expedition 302 Hole 4A "ACEX". Lomonosov Ridge (Sluijs et al. 2020) doi.org/10.5194/cp-2020-13
							OPTIMAL Op3 PREFERRED				OPTIMAL Op1
Depth (mcd)	GDGT.0	GDGT.1	GDGT.2	GDGT.3	Crenarchaeol	Cren'	D_nearest	SST (ºC)	StDev on SST		D_nearest	SST (ºC)	StDev on SST
367.4	0.421489	0.051773	0.045065	0.009315	0.457351	0.015007	0.408798	17.338	3.66948		0.39395	17.1946	3.82219
367.5	0.437893	0.049111	0.042479	0.009438	0.447479	0.0136	0.362314	16.0752	3.79686		0.388066	15.0596	3.91611
367.6	0.416527	0.051862	0.049343	0.009877	0.456465	0.015925	0.433649	18.1511	3.82523		0.395783	17.9075	3.98295
367.7	0.402997	0.054225	0.054833	0.010183	0.460424	0.017338	0.377827	19.3733	3.85085		0.447706	19.3657	4.01407
367.8	0.399245	0.055014	0.055128	0.009875	0.464376	0.016363	0.346008	19.4318	3.76918		0.430318	19.5894	3.94435
367.9	0.411124	0.057684	0.055711	0.011146	0.446983	0.017353	0.456627	18.977	4.01507		0.466433	18.4737	4.1006
367.95	0.404184	0.047407	0.042605	0.009229	0.482942	0.013633	0.435324	17.9676	3.66062		0.431049	18.1026	3.83194
367.99	0.399318	0.036007	0.026739	0.007919	0.520857	0.009159	0.288774	16.0169	3.5351		0.280881	15.0842	3.70562
368.05	0.412819	0.062046	0.057824	0.01072	0.435739	0.020851	0.445061	19.3885	3.90326		0.38938	18.8773	3.98391
368.08	0.482887	0.063219	0.051665	0.009928	0.375246	0.017055	0.590549	17.9048	4.25746		0.576599	16.1711	4.21427
368.12	0.451565	0.072023	0.079322	0.01498	0.358608	0.023502	1.17075	20.7259	7.01631		1.0658	17.4986	6.64059
368.21	0.416815	0.072534	0.075383	0.01976	0.391664	0.023844	0.731954	20.7698	5.56972		0.704525	20.9122	5.61272
368.23	0.410774	0.070269	0.074472	0.013312	0.40958	0.021594	0.685954	23.23	5.18979		0.766643	21.1305	5.07286
368.28	0.37239	0.062362	0.067607	0.009313	0.468359	0.019968	0.311732	21.2249	3.68009		0.237688	21.026	3.84213
368.34	0.349866	0.064133	0.070171	0.009489	0.48311	0.023231	0.303916	21.1411	3.50317		0.302132	20.882	3.67587
368.41	0.309436	0.061271	0.086836	0.012965	0.497245	0.032248	0.399353	26.8747	3.76342		0.483694	25.5486	3.95398
368.44	0.303679	0.062248	0.087302	0.009779	0.50649	0.030503	0.309995	22.8667	3.65728		0.336995	21.7991	3.85196
368.48	0.350358	0.052964	0.045748	0.01053	0.524293	0.016107	0.268749	19.0261	3.4046		0.281363	19.7002	3.57273
368.55	0.392254	0.042447	0.030294	0.010837	0.514566	0.009604	0.340516	17.1997	3.64117		0.435532	17.1865	3.88007
368.58	0.39902	0.043126	0.030174	0.010478	0.507799	0.009404	0.301763	16.367	3.58203		0.408545	16.4754	3.79496
368.62	0.364624	0.04957	0.040384	0.012774	0.518603	0.014046	0.328437	20.1039	3.58426		0.429674	20.3788	3.81746
368.72	0.291546	0.055773	0.073973	0.008915	0.537382	0.032413	0.287928	19.9103	3.52045		0.334048	19.389	3.7494
368.74	0.298181	0.058838	0.082367	0.010422	0.515177	0.035015	0.309981	23.1065	3.54519		0.281631	22.1899	3.76401
368.79	0.296417	0.06481	0.090933	0.008196	0.508183	0.031461	0.348582	22.7405	3.82982		0.362895	21.649	3.94319
368.84	0.350233	0.063846	0.067601	0.007472	0.48983	0.021018	0.298607	20.8807	3.47929		0.248948	20.4215	3.65316
368.88	0.355725	0.062849	0.065588	0.007542	0.487706	0.020588	0.297499	20.689	3.48025		0.263064	20.3536	3.65392
368.9	0.392663	0.066388	0.066423	0.005839	0.446687	0.022	0.420379	22.4769	3.75907		0.394958	21.5416	3.81845
368.94	0.427724	0.063076	0.054905	0.007603	0.429993	0.016699	0.449473	20.1451	3.57245		0.381221	19.5832	3.71216
369.02	0.355104	0.062921	0.065132	0.006385	0.486058	0.0244	0.19167	21.5771	3.45835		0.228911	20.7812	3.60649
369.04	0.360388	0.060095	0.062907	0.004632	0.492053	0.019924	0.252294	20.8765	3.56896		0.286935	19.8399	3.72654
369.09	0.407052	0.05896	0.050661	0.006393	0.458786	0.018147	0.302688	19.6125	3.44791		0.294268	19.4843	3.59619
369.13	0.449189	0.063479	0.047449	0.008134	0.414347	0.017401	0.285934	17.3286	3.42975		0.289971	16.8424	3.5899
369.18	0.365725	0.058828	0.065004	0.005535	0.483796	0.021111	0.327457	21.7469	3.68592		0.275445	20.6532	3.82428
369.21	0.347545	0.065573	0.076237	0.007029	0.478772	0.024844	0.378415	22.9226	3.70476		0.37007	21.8845	3.81558
369.3	0.387343	0.05521	0.050972	0.004706	0.486427	0.015342	0.23137	18.9464	3.46971		0.223778	19.1525	3.63494
369.34	0.378074	0.063791	0.068753	0.007351	0.461402	0.020629	0.485832	22.3942	3.748		0.391357	21.7313	3.85667
369.4	0.384045	0.058312	0.059559	0.021026	0.461047	0.016011	0.738045	20.0444	5.46286		0.739786	19.471	5.56932
369.5	0.393021	0.063282	0.063975	0.005975	0.455612	0.018134	0.386634	21.8986	3.74588		0.354942	21.1294	3.83277
369.6	0.362777	0.056089	0.053192	0.0061	0.503676	0.018166	0.208127	19.4748	3.43679		0.263206	19.2749	3.61219
369.7	0.439651	0.061931	0.048024	0.010083	0.423183	0.017128	0.331009	15.7031	3.6739		0.340108	15.3732	3.78954
369.8	0.36707	0.061163	0.069549	0.006543	0.471524	0.024151	0.365176	22.6354	3.77724		0.330504	21.6122	3.87787
369.88	0.415713	0.055148	0.040189	0.007758	0.463971	0.017221	0.415058	17.2264	3.37775		0.37985	17.3702	3.53331
369.98	0.389545	0.056344	0.054676	0.005779	0.479223	0.014434	0.279906	20.2783	3.5699		0.36271	20.1826	3.73029
370.08	0.390005	0.059914	0.05777	0.008085	0.466505	0.017721	0.321716	20.3347	3.5452		0.38505	20.3787	3.71515
370.2	0.355957	0.065603	0.0769	0.00876	0.469922	0.022857	0.355764	22.4902	3.75472		0.393577	21.8731	3.88848
370.3	0.390258	0.055687	0.058166	0.005917	0.473973	0.015999	0.299741	21.056	3.71875		0.372167	20.7306	3.85909
370.39	0.417993	0.058879	0.051161	0.008317	0.446441	0.017209	0.430825	19.1059	3.54237		0.465183	18.9501	3.70181
370.4	0.422889	0.05404	0.048491	0.011063	0.448645	0.014871	0.408098	16.8846	3.9356		0.393162	16.3451	4.04159
370.5	0.4256	0.064227	0.056567	0.009375	0.426682	0.017549	0.43484	19.3289	3.69185		0.354004	18.811	3.81544
370.58	0.48916	0.039633	0.035934	0.028155	0.402667	0.004452	1.84328	16.7417	8.5622		1.74499	15.5666	8.71074
370.6	0.394166	0.061409	0.065907	0.008701	0.452536	0.017281	0.368135	21.6648	3.86879		0.378383	21.2578	4.00105
370.7	0.364021	0.058531	0.059791	0.007919	0.490477	0.019261	0.32411	19.8641	3.49074		0.32986	19.9792	3.67973
370.8	0.39311	0.060564	0.057543	0.007562	0.463014	0.018207	0.346398	20.5995	3.53674		0.369137	20.4783	3.69383
370.9	0.409173	0.057899	0.050328	0.007105	0.459799	0.015696	0.347725	19.6218	3.48976		0.350543	19.5507	3.64647
371	0.437039	0.053216	0.040984	0.007792	0.448377	0.012591	0.477517	17.1281	3.50246		0.465202	16.6589	3.64487
371.2	0.429443	0.053789	0.059279	0.012052	0.425846	0.01959	0.713116	19.4301	4.95973		0.688887	17.1431	4.88056
371.3	0.461939	0.060527	0.047185	0.011416	0.403858	0.015075	0.611563	13.6454	4.33182		0.535936	11.9283	4.2496
371.4	0.494515	0.049634	0.037191	0.012698	0.392727	0.013235	0.708139	10.5432	5.0832		0.563908	5.36734	4.45759
371.5	0.50196	0.042876	0.031685	0.016981	0.397079	0.009417	1.42252	15.3269	7.51202		0.460103	2.04181	4.48559
371.6	0.4871	0.045303	0.033767	0.014804	0.407984	0.011042	0.916035	12.7244	6.09214		0.418461	3.31754	4.43192
371.7	0.494964	0.050713	0.035556	0.014502	0.393804	0.010462	0.942174	11.6506	6.06902		0.580975	3.02995	4.50862
371.78	0.475901	0.04884	0.036202	0.014327	0.415185	0.009545	0.807819	12.4918	5.55627		0.488438	4.85623	4.41564
371.9	0.503558	0.046314	0.032288	0.013998	0.395869	0.007973	0.838615	10.6828	5.82976		0.593416	2.61123	4.4678
371.93	0.488715	0.045771	0.031375	0.012649	0.403933	0.017557	0.559771	9.49577	4.68379		0.486908	4.34945	4.22882
372.03	0.446973	0.049901	0.031031	0.01206	0.446576	0.013459	0.262258	11.0978	3.76649		0.277942	9.35511	3.81183
372.09	0.470053	0.042751	0.031338	0.010735	0.430281	0.014842	0.369343	9.96	3.85227		0.330929	6.85859	3.89323
372.15	0.49627	0.050158	0.034153	0.010369	0.400642	0.008408	0.427796	10.8479	3.95027		0.322731	8.81986	3.91475
372.16	0.49287	0.047878	0.03852	0.021253	0.391433	0.008046	0.993964	17.9731	7.29235		0.487409	8.46303	5.21958
372.67	0.465972	0.042978	0.029	0.011508	0.442155	0.008388	0.222192	9.09505	3.82367		0.217217	6.28639	3.79886
372.97	0.46614	0.044148	0.030434	0.012744	0.434282	0.012252	0.373604	10.4897	4.33236		0.331218	6.0453	3.98727
373.25	0.486737	0.046533	0.035442	0.012503	0.408353	0.010431	0.576514	10.2612	4.73895		0.49109	5.34584	4.27475
373.87	0.466404	0.050825	0.035378	0.016257	0.422803	0.008333	1.02337	15.5955	6.35977		0.479443	5.40423	4.41477
374.17	0.50394	0.050302	0.03689	0.018677	0.381276	0.008915	1.31551	16.7778	7.67335		0.182024	3.70951	4.43366
374.77	0.452286	0.044594	0.031997	0.016857	0.444711	0.009555	1.06549	17.3904	6.55884		0.441838	7.27137	4.51456
375.07	0.485054	0.042823	0.034942	0.019514	0.410829	0.006837	1.23914	17.7644	7.62172		0.216721	5.48908	4.64965
375.7	0.476149	0.044448	0.032005	0.01594	0.423638	0.00782	1.09824	14.8948	6.53564		0.319936	3.92141	4.30068
376	0.485677	0.0452	0.035761	0.021547	0.404498	0.007317	1.04859	17.9408	7.44467		0.557873	8.8595	5.5484
376.3	0.477293	0.041943	0.034509	0.02144	0.416884	0.00793	1.09446	17.9774	7.53842		0.582948	8.84262	5.73225
377.55	0.526597	0.039522	0.028851	0	0.40503	0	0.562852	7.92429	4.24202		0.564067	5.76931	4.32026
378.21	0.400945	0.054621	0.052195	0.017454	0.463945	0.010839	0.742271	20.8084	5.32544		0.768708	17.2293	5.12278
378.41	0.460716	0.04614	0.040105	0.023776	0.422006	0.007257	0.960157	17.7888	7.20832		0.909695	13.9884	6.81915
378.61	0.429735	0.056072	0.050012	0.023222	0.430018	0.01094	0.590474	18.3639	5.8224		0.512807	17.2115	5.67158
378.81	0.419349	0.047396	0.042091	0.011954	0.469096	0.010114	0.465307	16.4306	4.0235		0.498634	15.2079	4.15411
379.01	0.407792	0.051604	0.050512	0.011485	0.466729	0.011878	0.474002	18.2796	4.04076		0.500553	17.8332	4.18142
380.31	0.439246	0.0494	0.04531	0.016159	0.449885	0	0.782854	18.0697	5.82645		0.693803	10.4945	5.04427
380.51	0.47503	0.042625	0.030009	0.013885	0.430724	0.007726	0.633381	11.5172	5.16975		0.407251	4.31889	4.14662
380.71	0.442527	0.060045	0.054236	0	0.443193	0	0.317696	10.3945	4.03065		0.43936	11.5354	4.33311
380.91	0.445341	0.049403	0.041844	0.018492	0.436563	0.008358	1.14095	18.8553	6.56168		0.595936	9.97426	4.91005
381.11	0.425088	0.050837	0.046835	0.013782	0.453363	0.010094	0.664984	17.583	4.66165		0.660014	14.2891	4.5629
381.31	0.431934	0.043874	0.034227	0.01431	0.467621	0.008034	0.717503	16.4909	4.79441		0.541677	11.3669	4.36918
381.51	0.436898	0.052945	0.045049	0.01758	0.437698	0.00983	0.904595	18.9923	6.05372		0.780954	11.5678	4.94528
381.71	0.406941	0.054089	0.048815	0.012818	0.467928	0.009409	0.52744	18.2376	4.09443		0.454126	17.0973	4.1859
381.82	0.419961	0.059801	0.049461	0.018595	0.442431	0.009751	0.973683	19.7186	5.63487		0.849113	15.397	5.05732
382.02	0.423018	0.050416	0.041849	0.013917	0.462304	0.008497	0.600109	17.1211	4.42095		0.64292	13.8138	4.33823
382.22	0.366888	0.058951	0.065946	0.01696	0.477768	0.013487	0.717214	23.0601	4.88325		0.737795	21.5478	4.94231
382.42	0.335232	0.059677	0.069026	0.019384	0.504233	0.012448	0.882657	22.2657	5.1453		0.891789	20.9971	5.19937
382.62	0.359328	0.052972	0.055607	0.016993	0.503277	0.011823	0.637356	21.6774	4.6788		0.620484	20.0505	4.84935
382.82	0.303859	0.048736	0.056827	0.016486	0.560668	0.013423	0.457322	21.2553	4.02087		0.5165	20.1784	4.27421
383.02	0.338103	0.043866	0.043273	0.016407	0.549276	0.009076	0.467227	19.621	4.43829		0.649625	18.5676	4.88182
383.22	0.325295	0.044577	0.04599	0.014988	0.556748	0.012402	0.444336	19.9326	3.88786		0.519948	19.8004	4.25002
383.34	0.287721	0.043383	0.049235	0.016788	0.589309	0.013565	0.413715	19.8971	4.06411		0.513195	19.2846	4.43549
383.54	0.28341	0.042594	0.048066	0.017924	0.594633	0.013373	0.479879	19.5862	4.45553		0.6498	18.7124	4.94691
383.74	0.281972	0.04329	0.049117	0.017506	0.593419	0.014696	0.427121	19.9761	4.26058		0.607054	19.2262	4.69663
383.94	0.28217	0.043934	0.052083	0.018633	0.589858	0.013322	0.559261	20.1583	4.66073		0.671616	18.9104	5.17231
384.14	0.284829	0.044514	0.049627	0.018824	0.588606	0.0136	0.544995	19.6376	4.66169		0.675805	18.5859	5.20693
384.34	0.280103	0.042846	0.048731	0.01771	0.597377	0.013233	0.452502	19.798	4.3388		0.627697	18.9595	4.79598
384.8	0.276706	0.044129	0.048971	0.01758	0.595461	0.017152	0.42044	20.2374	4.20288		0.590944	19.667	4.64413
384.93	0.296117	0.044076	0.049312	0.016895	0.580659	0.012942	0.417091	19.8143	4.13244		0.588148	19.0721	4.51447
385.1	0.287747	0.04317	0.046555	0.017511	0.590144	0.014873	0.441205	19.4599	4.30366		0.618637	18.8492	4.76169
388.01	0.34675	0.046043	0.04836	0.020867	0.525839	0.012142	0.88532	18.4203	5.98884		1.0231	17.1583	6.51564
388.21	0.449531	0.044589	0.020295	0.031523	0.44634	0.007722	2.67097	16.4112	8.67887		2.32472	15.7784	8.88934
388.41	0.438491	0.044097	0.041047	0.026017	0.450348	0	1.30587	17.0309	7.98938		1.22824	15.9904	8.04691
388.61	0.427429	0.055488	0.055687	0.046232	0.409212	0.005951	2.982	16.4934	8.68172		3.08835	15.6302	8.90595
388.81	0.416909	0.043927	0.043692	0.033697	0.454029	0.007746	2.79793	16.5393	8.67994		2.63835	15.8141	8.90141
389.01	0.478687	0.044191	0.041457	0.032894	0.394715	0.008057	2.74135	16.4403	8.68016		2.49062	15.7691	8.89874
389.21	0.449833	0.045854	0.045177	0.032358	0.407231	0.019546	2.56762	16.4848	8.67698		2.32551	15.9233	8.88926
389.41	0.399487	0.051304	0.048922	0.024129	0.476157	0	0.952878	17.3759	6.81203		0.901372	17.0612	6.94197
389.51	0.472122	0.041944	0.041581	0.033466	0.404801	0.006086	2.87359	16.433	8.68117		2.61827	15.7169	8.90227
389.71	0.473399	0.048662	0.048771	0.03991	0.383139	0.006119	3.18992	16.431	8.68205		3.34258	15.5746	8.90615
389.91	0.472773	0.044742	0.041714	0.031595	0.404028	0.005148	2.44111	16.4862	8.6728		2.22273	15.918	8.88007
390.11	0.452526	0.043862	0.043139	0.033123	0.421354	0.005996	2.7677	16.4598	8.68026		2.50939	15.7931	8.89917
390.31	0.440303	0.045918	0.046645	0.028826	0.429822	0.008487	1.76954	16.725	8.5205		1.62803	16.5394	8.64581
390.51	0.474273	0.053766	0.05398	0.045543	0.367194	0.005244	3.44862	16.4041	8.68215		3.57781	15.5557	8.90619
390.71	0.439921	0.051846	0.04801	0.026563	0.421338	0.012322	1.23012	17.2182	7.87255		1.11226	17.2406	7.821

## Sheet: Cretaceous
CRETACEOUS DATA (O'Brien et al. 2017; doi.org/10.1016/j.earscirev.2017.07.012)
																															OPTIMAL Op3
SITE	LAT	LONG	LAT	LONG	AGE (GTS 2012)	STAGE (GTS 2012)	1302	1300	1298	1296	1292	1292'	Fr.1302	Fr.1300	Fr.1298	Fr.1296	Fr.1292	Fr.1292'		TEX86	RI	BIT	MI	%GDGT-0	%GDGT_RS	Cren'	GDGT2:GDGT3	Abundance of cren'	DRI		D_nearest	SST (ºC)	StDev on SST
			decimal	decimal			GDGT0	GDGT1	GDGT2	GDGT3	CREN	CREN'	GDGT0	GDGT1	GDGT2	GDGT3	CREN	CREN'
ADERET 1 BOREHOLE	31°N	34°E	31	34	69.048	Maastrichtian	788000	326000	363000	122000	1930000	279000	0.206933	0.0856092	0.0953256	0.0320378	0.506828	0.0732668		0.700917	2.69275	n/a	0.268543	28.9919	26.1481	0.126301	2.97541	0.255963	-0.0113915		1.61669	20.1613	8.28905
ADERET 1 BOREHOLE	31°N	34°E	31	34	69.0977	Maastrichtian	816000	294000	320000	118000	1830000	327000	0.220243	0.0793522	0.0863698	0.0318489	0.493927	0.0882591		0.72238	2.67638	n/a	0.253375	30.839	28.6089	0.151599	2.71186	0.308782	0.0898676		1.62854	20.2087	8.28125
ADERET 1 BOREHOLE	31°N	34°E	31	34	69.156	Maastrichtian	286000	110000	118000	45400	793000	101000	0.19678	0.0756846	0.0811889	0.0312371	0.545617	0.0694922		0.706197	2.79221	n/a	0.234196	26.506	26.0982	0.112975	2.59912	0.269765	-0.0902535		1.57443	21.2421	8.00135
ADERET 1 BOREHOLE	31°N	34°E	31	34	69.2073	Maastrichtian	205000	79500	89200	28600	643000	81600	0.181915	0.0705475	0.0791552	0.0253794	0.570592	0.072411		0.714952	2.87701	n/a	0.214015	24.1745	28.4717	0.112614	3.11888	0.292578	-0.140483		0.676916	24.5083	5.30179
ADERET 1 BOREHOLE	31°N	34°E	31	34	69.258	Maastrichtian	696000	267000	314000	97700	1540000	223000	0.221819	0.0850942	0.100073	0.0311375	0.490805	0.0710712		0.703893	2.62616	n/a	0.277962	31.127	24.2655	0.126489	3.21392	0.247311	0.0667867		1.8319	19.7766	8.39709
ADERET 1 BOREHOLE	31°N	34°E	31	34	69.3118	Maastrichtian	505000	194000	251000	85300	1310000	243000	0.195109	0.0749527	0.0969748	0.032956	0.506124	0.093884		0.749127	2.7678	n/a	0.254548	27.8237	32.4866	0.156471	2.94256	0.314238	0.108526		1.46261	20.6759	8.16043
ADERET 1 BOREHOLE	31°N	34°E	31	34	69.3651	Maastrichtian	228000	90000	96100	35800	714000	83400	0.182795	0.0721559	0.0770464	0.028702	0.572436	0.0668644		0.705208	2.86956	n/a	0.217698	24.2038	26.7823	0.10459	2.68436	0.273174	-0.171472		1.01579	22.4907	7.02539
ADERET 1 BOREHOLE	31°N	34°E	31	34	69.4335	Maastrichtian	852000	289000	300000	105000	1490000	195000	0.263695	0.089446	0.0928505	0.0324977	0.461158	0.0603528		0.674916	2.45868	n/a	0.291719	36.3792	18.6246	0.115727	2.85714	0.219348	0.12393		1.73209	18.7337	8.48631
ADERET 1 BOREHOLE	31°N	34°E	31	34	69.4858	Maastrichtian	1240000	474000	472000	157000	2320000	306000	0.249547	0.0953914	0.0949889	0.0315959	0.466895	0.0615818		0.663591	2.49406	n/a	0.29579	34.8315	19.793	0.116527	3.00637	0.217175	0.0469445		1.8963	18.6388	8.53546
ADERET 1 BOREHOLE	31°N	34°E	31	34	69.6437	Maastrichtian	986000	340000	343000	125000	1650000	218000	0.269252	0.0928454	0.0936647	0.0341344	0.450573	0.0595303		0.668616	2.42299	n/a	0.301943	37.4052	18.1063	0.116702	2.744	0.212476	0.13637		1.56928	18.8124	8.3852
ADERET 1 BOREHOLE	31°N	34°E	31	34	69.8006	Maastrichtian	751000	251000	251000	90500	1340000	205000	0.259997	0.0868963	0.0868963	0.0313311	0.463909	0.0709711		0.685266	2.4942	n/a	0.277193	35.9158	21.4435	0.132686	2.77348	0.257053	0.127183		1.8839	18.8563	8.5102
ADERET 1 BOREHOLE	31°N	34°E	31	34	69.9231	Maastrichtian	850000	279000	253000	85700	1140000	149000	0.30834	0.101208	0.0917764	0.0310879	0.413538	0.0540501		0.636103	2.24838	n/a	0.323963	42.7136	14.9149	0.115593	2.95216	0.194339	0.195185		2.32408	17.3391	8.65531
ADERET 1 BOREHOLE	31°N	34°E	31	34	70.062	Maastrichtian	477000	171000	174000	62200	865000	135000	0.253158	0.0907547	0.0923469	0.0330114	0.459081	0.0716484		0.684618	2.4974	n/a	0.289369	35.544	22.0588	0.135	2.79743	0.248986	0.121536		1.63482	18.9503	8.42484
ADERET 1 BOREHOLE	31°N	34°E	31	34	70.174	Maastrichtian	981000	381000	401000	145000	1960000	313000	0.234633	0.0911265	0.0959101	0.0346807	0.468787	0.0748625		0.692742	2.56159	n/a	0.289688	33.356	24.1886	0.137703	2.76552	0.252419	0.08824		1.36111	19.6885	8.13176
ADERET 1 BOREHOLE	31°N	34°E	31	34	70.4248	Maastrichtian	1310000	445000	454000	172000	2300000	301000	0.262947	0.0893216	0.0911281	0.0345243	0.461662	0.0604175		0.675656	2.46347	n/a	0.291667	36.2881	18.684	0.115725	2.63953	0.219388	0.121893		1.41373	19.3871	8.2089
ADERET 1 BOREHOLE	31°N	34°E	31	34	70.4647	Maastrichtian	645000	228000	254000	88500	1490000	202000	0.22184	0.0784179	0.0873603	0.0304385	0.512468	0.0694755		0.704854	2.67223	n/a	0.252155	30.2108	23.8489	0.119385	2.87006	0.261489	0.0244765		1.58864	20.6515	8.17201
ADERET 1 BOREHOLE	31°N	34°E	31	34	70.5451	Maastrichtian	380000	133000	157000	55200	957000	163000	0.20594	0.0720789	0.0850856	0.0299155	0.518643	0.0883373		0.738292	2.75992	n/a	0.235599	28.4218	30.0184	0.145536	2.8442	0.32074	0.0712468		1.37224	21.6636	7.8601
ADERET 1 BOREHOLE	31°N	34°E	31	34	70.585	Maastrichtian	361259	132000	143000	49400	872000	101000	0.217802	0.0795824	0.0862142	0.0297831	0.525726	0.0608926		0.689704	2.68783	n/a	0.250039	29.293	21.8492	0.103803	2.89474	0.237424	-0.0496106		1.45663	20.9309	8.01801
ADERET 1 BOREHOLE	31°N	34°E	31	34	70.6667	Maastrichtian	1000000	346000	373000	127000	1890000	332000	0.245821	0.0850541	0.0916912	0.0312193	0.464602	0.0816126		0.706282	2.54695	n/a	0.27575	34.6021	24.9249	0.149415	2.93701	0.281834	0.15534		1.89556	19.2102	8.47673
ADERET 1 BOREHOLE	31°N	34°E	31	34	70.7068	Maastrichtian	393000	132000	140000	53500	910000	109000	0.226187	0.0759712	0.0805755	0.0307914	0.523741	0.0627338		0.696203	2.6754	n/a	0.242097	30.1612	21.7131	0.106968	2.61682	0.250863	-0.0122744		1.65736	20.4792	8.1909
ADERET 1 BOREHOLE	31°N	34°E	31	34	70.7845	Maastrichtian	533000	160000	212000	74900	1120000	180000	0.233782	0.0701785	0.0929865	0.0328523	0.49125	0.0789508		0.744776	2.63551	n/a	0.255825	32.2444	25.2454	0.138462	2.83044	0.287127	0.222587		1.46523	20.2831	8.202
ADERET 1 BOREHOLE	31°N	34°E	31	34	70.8631	Maastrichtian	129000	50900	54400	20300	405000	47500	0.182435	0.0719842	0.076934	0.0287088	0.572762	0.0671758		0.70595	2.87173	n/a	0.217263	24.1573	26.9122	0.104972	2.6798	0.274408	-0.170737		1.01436	22.4989	7.02144
ADERET 1 BOREHOLE	31°N	34°E	31	34	70.9509	Maastrichtian	101000	42500	45100	20100	413000	39700	0.152706	0.0642576	0.0681887	0.0303901	0.624433	0.0600242		0.711669	3.02963	n/a	0.192184	19.6498	28.2161	0.087696	2.24378	0.269335	-0.30613		1.28804	21.4764	7.65484
ADERET 1 BOREHOLE	31°N	34°E	31	34	70.9953	Maastrichtian	188000	77700	80200	34800	657000	75300	0.168913	0.0698113	0.0720575	0.0312668	0.590296	0.067655		0.710075	2.93953	n/a	0.208324	22.2485	28.5986	0.102827	2.3046	0.28097	-0.222326		1.48686	21.4792	7.84802
ADERET 1 BOREHOLE	31°N	34°E	31	34	71.0314	Maastrichtian	221000	90800	97300	38600	633000	89700	0.188824	0.0775803	0.083134	0.0329802	0.540841	0.0766405		0.713021	2.81271	n/a	0.238782	25.8782	28.8703	0.124118	2.52073	0.283502	-0.0838533		1.24835	21.3693	7.80743
ADERET 1 BOREHOLE	31°N	34°E	31	34	71.0733	Maastrichtian	147000	63200	69300	28000	558000	79200	0.155605	0.0668995	0.0733566	0.029639	0.590664	0.0838361		0.736337	3.00053	n/a	0.201203	20.8511	35.0133	0.124294	2.475	0.330413	-0.17743		1.09554	22.4216	7.23613
ADERET 1 BOREHOLE	31°N	34°E	31	34	71.161	Maastrichtian	287000	100000	120000	46500	774000	124000	0.197726	0.0688942	0.0826731	0.0320358	0.533241	0.0854289		0.743918	2.80503	n/a	0.228854	27.05	30.1703	0.138085	2.58065	0.317542	0.0494885		1.46406	21.3949	7.99493
ADERET 1 BOREHOLE	31°N	34°E	31	34	71.2002	Maastrichtian	291000	106000	115000	39900	701000	80900	0.218174	0.0794722	0.0862198	0.0299145	0.525566	0.0606538		0.689877	2.68653	n/a	0.250192	29.3347	21.7532	0.103466	2.88221	0.236688	-0.047651		1.4791	20.8756	8.04767
ADERET 1 BOREHOLE	31°N	34°E	31	34	71.2387	Maastrichtian	176000	69900	79300	20600	533000	74100	0.184699	0.073355	0.0832196	0.0216182	0.559345	0.0777626		0.713407	2.85308	n/a	0.218561	24.8237	29.6281	0.122056	3.84951	0.303813	-0.12269		0.68152	26.5073	4.46213
ADERET 1 BOREHOLE	31°N	34°E	31	34	71.2788	Maastrichtian	90500	34800	37300	14000	273000	32000	0.187915	0.0722591	0.0774502	0.0290698	0.56686	0.0664452		0.705334	2.84759	n/a	0.220148	24.8968	26.1224	0.104918	2.66429	0.270957	-0.14901		1.10541	22.2193	7.27639
ADERET 1 BOREHOLE	31°N	34°E	31	34	71.318	Maastrichtian	609000	215000	233000	79900	1310000	179000	0.23192	0.0818767	0.0887315	0.0304277	0.498877	0.0681671		0.695855	2.6188	n/a	0.261738	31.7353	22.7157	0.120215	2.91615	0.253218	0.0429859		1.68921	20.1092	8.29683
ADERET 1 BOREHOLE	31°N	34°E	31	34	71.3573	Maastrichtian	476000	177000	223000	76300	1110000	170000	0.213233	0.0792904	0.099897	0.03418	0.497245	0.0761546		0.726133	2.67522	n/a	0.271195	30.0126	26.3158	0.132812	2.92267	0.263036	0.10619		1.28928	20.4242	7.99411
ADERET 1 BOREHOLE	31°N	34°E	31	34	71.4482	Maastrichtian	253000	92200	100000	34700	601000	72400	0.219371	0.0799445	0.0867077	0.0300876	0.521113	0.0627764		0.691948	2.67918	n/a	0.252027	29.6253	22.2495	0.107514	2.88184	0.241898	-0.0323923		1.52161	20.7493	8.10456
ADERET 1 BOREHOLE	31°N	34°E	31	34	71.4882	Maastrichtian	327000	124000	125000	47400	946000	109000	0.194828	0.0738799	0.0744757	0.0282412	0.563632	0.0649428		0.694129	2.82185	n/a	0.219328	25.6874	25	0.103318	2.63713	0.26887	-0.166706		1.0599	22.067	7.12627
ADERET 1 BOREHOLE	31°N	34°E	31	34	71.606	Maastrichtian	319000	117000	133000	45600	901000	112000	0.195994	0.071885	0.0817154	0.0280167	0.553576	0.068813		0.712954	2.80892	n/a	0.22589	26.1475	25.9861	0.110563	2.91667	0.274779	-0.0803289		0.967619	23.0108	6.79814
ADERET 1 BOREHOLE	31°N	34°E	31	34	71.6838	Maastrichtian	306000	108000	115000	42200	884000	97900	0.197025	0.0695383	0.0740455	0.0271715	0.569184	0.0630352		0.702561	2.82802	n/a	0.212653	25.7143	24.2387	0.0997047	2.72512	0.269623	-0.140267		0.91317	22.8072	6.527
ADERET 1 BOREHOLE	31°N	34°E	31	34	71.7238	Maastrichtian	256000	88200	105000	37500	770000	123000	0.185548	0.0639269	0.0761035	0.0271798	0.558092	0.0891498		0.750636	2.88664	n/a	0.205304	24.9513	32.4538	0.137738	2.8	0.347752	-0.00396256		0.80249	23.7686	6.22429
ADERET 1 BOREHOLE	31°N	34°E	31	34	72.261	Campanian	839000	254000	309000	91500	1640000	266000	0.246801	0.0747169	0.0908957	0.0269157	0.482424	0.0782468		0.724063	2.57994	n/a	0.255614	33.8443	24.0724	0.139559	3.37705	0.288973	0.1931		1.28718	21.7893	7.64526
ADERET 1 BOREHOLE	31°N	34°E	31	34	73.0274	Campanian	165000	65500	80700	29500	567000	82900	0.166566	0.0661215	0.0814658	0.0297799	0.57238	0.0836867		0.746713	2.94266	n/a	0.212815	22.541	33.4409	0.127558	2.73559	0.320572	-0.0764631		1.09337	23.089	7.17463
ADERET 1 BOREHOLE	31°N	34°E	31	34	73.4106	Campanian	401000	157000	183000	66700	1250000	150000	0.181637	0.0711147	0.0828917	0.0302124	0.5662	0.067944		0.717981	2.86411	n/a	0.225107	24.2883	27.2232	0.107143	2.74363	0.269445	-0.115508		1.25617	22.2673	7.58339
ADERET 1 BOREHOLE	31°N	34°E	31	34	73.7939	Campanian	347000	135000	159000	65700	1180000	137000	0.171468	0.0667095	0.078569	0.0324653	0.58309	0.0676978		0.728206	2.9244	n/a	0.214529	22.7243	28.3058	0.104024	2.42009	0.27582	-0.134571		1.27947	22.0085	7.70006
ADERET 1 BOREHOLE	31°N	34°E	31	34	74.1771	Campanian	142000	59400	60000	25000	515000	62900	0.164295	0.0687261	0.0694203	0.0289251	0.595858	0.0727757		0.713459	2.96888	n/a	0.199917	21.6134	30.6979	0.108842	2.4	0.303425	-0.238282		1.03531	22.0147	7.11975
ADERET 1 BOREHOLE	31°N	34°E	31	34	74.9435	Campanian	155000	62100	68700	29000	538000	78500	0.166434	0.066681	0.0737679	0.0311393	0.577687	0.0842908		0.739404	2.95555	n/a	0.205848	22.3665	33.6188	0.127332	2.36897	0.329417	-0.119782		1.43601	21.7664	7.81173
ADERET 1 BOREHOLE	31°N	34°E	31	34	75.3268	Campanian	101000	35400	37200	16200	341000	39300	0.177162	0.0620944	0.0652517	0.0284161	0.598141	0.0689353		0.723653	2.94615	n/a	0.189299	22.8507	28.0114	0.103339	2.2963	0.306792	-0.174764		1.03846	21.7713	7.10463
ADERET 1 BOREHOLE	31°N	34°E	31	34	75.71	Campanian	104000	45200	49100	20600	422000	49700	0.150594	0.0654503	0.0710976	0.0298291	0.611063	0.0719664		0.725395	3.02925	n/a	0.195875	19.7719	32.3357	0.105364	2.3835	0.301944	-0.250827		1.13179	22.0968	7.32838
ADERET 1 BOREHOLE	31°N	34°E	31	34	75.8275	Campanian	280000	104000	106000	40100	764000	107000	0.199843	0.0742274	0.0756548	0.0286204	0.545286	0.0763686		0.708765	2.79802	n/a	0.223084	26.8199	27.6486	0.122847	2.64339	0.299636	-0.0859699		1.15207	21.8761	7.40124
ADERET 1 BOREHOLE	31°N	34°E	31	34	75.8862	Campanian	223000	72800	79000	35200	685000	72800	0.190957	0.0623394	0.0676486	0.0301421	0.586573	0.0623394		0.719784	2.88371	n/a	0.197925	24.5595	24.6112	0.0960676	2.24432	0.280216	-0.127889		1.35849	21.2149	7.79593
ADERET 1 BOREHOLE	31°N	34°E	31	34	75.947	Campanian	190000	68600	80600	32200	652000	65300	0.17452	0.0630109	0.0740333	0.0295766	0.598879	0.0599798		0.721929	2.93524	n/a	0.201847	22.5653	25.5778	0.0910358	2.50311	0.264694	-0.170805		1.10647	22.365	7.24453
ADERET 1 BOREHOLE	31°N	34°E	31	34	76.18	Campanian	39100	16700	18000	8940	142000	13900	0.163845	0.0699799	0.0754274	0.0374623	0.595039	0.0582467		0.709767	2.94636	n/a	0.218703	21.5903	26.2264	0.0891597	2.01342	0.241571	-0.230369		0.344485	24.796	5.01351
ADERET 1 BOREHOLE	31°N	34°E	31	34	76.4849	Campanian	76600	28300	22500	10700	157000	14100	0.247736	0.0915265	0.0727684	0.0346054	0.507762	0.0456016		0.625661	2.55433	n/a	0.264402	32.7911	15.5458	0.0824079	2.1028	0.186508	-0.146472		1.19435	20.265	7.82946
ADERET 1 BOREHOLE	31°N	34°E	31	34	76.7645	Campanian	77700	27700	20000	8130	131000	12100	0.280881	0.100134	0.0722987	0.0293894	0.473557	0.0437407		0.592227	2.40209	n/a	0.280651	37.2305	13.4744	0.0845563	2.46002	0.178125	-0.10367		2.15126	17.8114	8.57751
ADERET 1 BOREHOLE	31°N	34°E	31	34	77.1542	Campanian	27700	10800	9350	7530	119000	13700	0.147278	0.0574224	0.0497129	0.0400362	0.632709	0.0728413		0.739004	3.09916	n/a	0.17259	18.8821	33.0918	0.10324	1.2417	0.331078	-0.26505		1.17475	22.9697	7.36043
ADERET 1 BOREHOLE	31°N	34°E	31	34	77.4465	Campanian	650000	234000	274000	89400	1450000	217000	0.22303	0.080291	0.0940159	0.0306753	0.49753	0.0744579		0.712672	2.6483	n/a	0.263823	30.9524	25.0288	0.130174	3.06488	0.266454	0.0791767		1.68079	20.3424	8.27945
ADERET 1 BOREHOLE	31°N	34°E	31	34	77.7387	Campanian	78300	29900	29600	14400	258000	24400	0.180166	0.0687989	0.0681086	0.0331339	0.593649	0.0561436		0.695829	2.90359	n/a	0.207409	23.2828	23.7585	0.0864023	2.05556	0.24822	-0.241907		1.12312	21.6283	7.54965
ADERET 1 BOREHOLE	31°N	34°E	31	34	78.031	Campanian	473000	187000	209000	74500	1140000	184000	0.2086	0.0824697	0.092172	0.0328556	0.502756	0.0811466		0.714286	2.70099	n/a	0.26219	29.3242	28.0061	0.138973	2.80537	0.281131	0.0328853		1.43729	20.3923	8.15691
ADERET 1 BOREHOLE	31°N	34°E	31	34	78.9077	Campanian	540000	145000	175000	61800	1100000	168000	0.246598	0.0662161	0.079916	0.0282218	0.502329	0.0767193		0.736268	2.62691	n/a	0.231422	32.9268	23.7288	0.132492	2.83172	0.305566	0.195907		1.40524	21.0927	7.86752
ADERET 1 BOREHOLE	31°N	34°E	31	34	79.5027	Campanian	287000	100000	121000	46600	774000	124000	0.197577	0.0688421	0.0832989	0.0320804	0.532838	0.0853642		0.744637	2.80449	n/a	0.229581	27.05	30.1703	0.138085	2.59657	0.31665	0.0530304		1.45668	21.4088	7.99195
ADERET 1 BOREHOLE	31°N	34°E	31	34	80.2091	Campanian	109000	37000	41400	15700	318000	37700	0.195061	0.0662133	0.0740873	0.0280959	0.569077	0.067466		0.719272	2.84485	n/a	0.209204	25.5269	25.6987	0.105988	2.63694	0.286039	-0.0910777		0.981788	22.6092	6.85967
ADERET 1 BOREHOLE	31°N	34°E	31	34	80.7136	Campanian	213000	75700	88200	36200	626000	82400	0.189924	0.0674989	0.0786447	0.0322782	0.558181	0.073473		0.732035	2.84824	n/a	0.220253	25.3874	27.8944	0.116318	2.43646	0.291681	-0.0427985		1.34116	21.6797	7.83117
ADERET 1 BOREHOLE	31°N	34°E	31	34	81.9316	Campanian	105000	32800	48900	18500	339000	56000	0.174942	0.0546485	0.0814728	0.0308231	0.564812	0.0933022		0.790013	2.94252	n/a	0.202342	23.6486	34.7826	0.141772	2.64324	0.358515	0.11125		1.34233	22.7255	7.62777
ADERET 1 BOREHOLE	31°N	34°E	31	34	83.1102	Campanian	106000	36100	51200	25000	346000	73600	0.16617	0.0565919	0.0802634	0.0391911	0.542405	0.115379		0.80581	2.96583	n/a	0.21113	23.4513	40.98	0.175405	2.048	0.395912	0.159474		0.983635	22.8525	7.22925
ADERET 1 BOREHOLE	31°N	34°E	31	34	83.6249	Santonian - Campanian used	125000	30900	46500	16700	302000	47300	0.219916	0.0543631	0.0818086	0.0293807	0.531316	0.083216		0.781471	2.76425	n/a	0.212224	29.274	27.4521	0.135414	2.78443	0.334512	0.251531		1.29234	22.1337	7.6703
ADERET 1 BOREHOLE	31°N	34°E	31	34	84.0335	Santonian - Campanian used	79000	28900	46700	15600	360000	51500	0.135809	0.049682	0.0802819	0.0268179	0.618876	0.0885336		0.797477	3.12034	n/a	0.18142	17.9954	39.4636	0.125152	2.99359	0.360897	-0.0329743		0.423581	25.7451	4.68449
ADERET 1 BOREHOLE	31°N	34°E	31	34	84.5482	Santonian - Campanian used	65100	26400	39200	13400	340000	63700	0.118839	0.0481928	0.071559	0.0244615	0.620664	0.116283		0.814996	3.21249	n/a	0.163663	16.0701	49.4565	0.15779	2.92537	0.446391	-0.0448256		0.761044	23.8474	5.67583
ADERET 1 BOREHOLE	31°N	34°E	31	34	84.9518	Santonian - Campanian used	51300	23100	37300	14100	322000	65100	0.100019	0.045038	0.0727237	0.0274907	0.627803	0.126925		0.834527	3.29187	n/a	0.161395	13.7423	55.9278	0.168174	2.64539	0.466332	-0.0322893		0.933751	23.7911	6.40736
BASS RIVER	39°36′N	74°26′W	39.6	-74.4333	93.1303	Turonian	1910000	570000	1160000	685000	22100000	3070000	0.0647567	0.0193253	0.0393287	0.0232243	0.74928	0.104085		0.89608	3.58112	0.08	0.0875476	7.95502	61.6466	0.121971	1.69343	0.559708	-0.0152708		1.76933	18.0681	8.40782
BASS RIVER	39°36′N	74°26′W	39.6	-74.4333	93.1408	Turonian	1520000	491000	959000	569000	17700000	2640000	0.0636543	0.020562	0.0401608	0.0238285	0.741237	0.110557		0.894613	3.57955	0.08	0.0902992	7.90843	63.4615	0.129794	1.68541	0.566645	-0.0212974		1.75796	18.0162	8.41292
BASS RIVER	39°36′N	74°26′W	39.6	-74.4333	93.1919	Turonian	2490000	742000	1580000	937000	33900000	5130000	0.0556064	0.0165703	0.0352844	0.020925	0.757051	0.114563		0.911551	3.63637	0.07	0.077065	6.84254	67.3228	0.131437	1.68623	0.611515	0.0104069		1.7834	18.2955	8.44597
BASS RIVER	39°36′N	74°26′W	39.6	-74.4333	93.2759	Turonian	2910000	681000	1360000	777000	32000000	4660000	0.0686515	0.0160659	0.0320846	0.0183307	0.754931	0.109937		0.908933	3.5947	0.08	0.0713815	8.33572	61.5588	0.127114	1.75032	0.623161	0.0382728		1.75568	18.8077	8.33641
BASS RIVER	39°36′N	74°26′W	39.6	-74.4333	93.3274	Turonian	858000	311000	678000	398000	13000000	2060000	0.049581	0.0179717	0.0391794	0.0229991	0.751228	0.119041		0.909777	3.6464	0.06	0.0843315	6.19137	70.5963	0.136786	1.70352	0.597621	-0.00898837		1.84051	17.9308	8.46789
BASS RIVER	39°36′N	74°26′W	39.6	-74.4333	93.3784	Turonian	3290000	1020000	2130000	1300000	37100000	5760000	0.0650198	0.0201581	0.0420949	0.0256917	0.733202	0.113834		0.900098	3.56957	0.08	0.0940605	8.14558	63.6464	0.134391	1.63846	0.564153	0.0171447		1.83575	17.9697	8.44933
BASS RIVER	39°36′N	74°26′W	39.6	-74.4333	93.4223	Turonian	1860000	679000	1570000	930000	28100000	4200000	0.0498139	0.0181847	0.0420472	0.0249069	0.752564	0.112483		0.907982	3.63719	0.06	0.0896023	6.20828	69.3069	0.130031	1.68817	0.569183	-0.0092226		1.83767	17.8142	8.47762
BASS RIVER	39°36′N	74°26′W	39.6	-74.4333	93.4392	Turonian	1460000	514000	1180000	698000	26100000	4280000	0.0426502	0.0150152	0.0344707	0.0203903	0.762444	0.125029		0.922962	3.69502	0.04	0.0729891	5.29753	74.5645	0.140882	1.69054	0.641487	0.0124665		1.86081	18.1187	8.50472
BASS RIVER	39°36′N	74°26′W	39.6	-74.4333	93.4557	Turonian	2810000	794000	1880000	1180000	46800000	7360000	0.0461989	0.0130541	0.0309089	0.0194002	0.769433	0.121005		0.929196	3.69482	0.05	0.0664322	5.66418	72.3697	0.135894	1.59322	0.656322	0.0461981		1.92081	18.0156	8.52408
BASS RIVER	39°36′N	74°26′W	39.6	-74.4333	93.5164	Turonian	2450000	640000	1530000	938000	35700000	5750000	0.0521188	0.0136147	0.0325477	0.0199541	0.759445	0.12232		0.927749	3.66563	0.05	0.0697518	6.42202	70.122	0.138721	1.63113	0.649131	0.0675859		1.86122	18.1447	8.4987
BASS RIVER	39°36′N	74°26′W	39.6	-74.4333	93.5768	Turonian	4020000	1080000	2430000	1530000	63200000	10200000	0.0487509	0.0130973	0.0294688	0.0185545	0.766432	0.123696		0.929134	3.68821	0.05	0.0642529	5.98036	71.73	0.138965	1.58824	0.669291	0.0524764		1.94884	17.9936	8.51736
BASS RIVER	39°36′N	74°26′W	39.6	-74.4333	93.6101	Turonian	1330000	391000	878000	528000	19200000	3230000	0.0520405	0.0152991	0.0343546	0.0206597	0.751262	0.126384		0.92222	3.65657	0.07	0.0741734	6.47832	70.8333	0.144004	1.66288	0.64253	0.046945		1.83292	18.155	8.4869
BASS RIVER	39°36′N	74°26′W	39.6	-74.4333	93.6616	Turonian	2570000	852000	2070000	1190000	46900000	7340000	0.0421851	0.0139851	0.0339779	0.0195332	0.769837	0.120482		0.925603	3.70182	0.04	0.0704689	5.19507	74.0666	0.135324	1.7395	0.640936	0.0198475		1.8564	18.2548	8.49208
BASS RIVER	39°36′N	74°26′W	39.6	-74.4333	93.6705	Turonian	3000000	975000	2330000	1360000	50300000	8850000	0.0449001	0.0145925	0.0348724	0.0203547	0.752825	0.132455		0.927858	3.68652	0.04	0.0731019	5.62852	74.6835	0.14962	1.71324	0.654828	0.0472825		1.85544	18.1366	8.50374
BASS RIVER	39°36′N	74°26′W	39.6	-74.4333	93.6873	Turonian	1260000	500000	1230000	725000	24300000	4090000	0.0392462	0.0155739	0.0383118	0.0225822	0.756891	0.127394		0.923606	3.69709	0.04	0.0795915	4.92958	76.4486	0.144065	1.69655	0.624905	0.0138542		1.93313	17.7981	8.51927
BASS RIVER	39°36′N	74°26′W	39.6	-74.4333	93.7831	Turonian	1770000	564000	1490000	901000	38700000	6640000	0.035354	0.0112654	0.0297613	0.0179966	0.772995	0.132628		0.941219	3.74727	0.04	0.0611865	4.37361	78.9536	0.146449	1.65372	0.692027	0.0591604		2.04523	17.7501	8.5613
BASS RIVER	39°36′N	74°26′W	39.6	-74.4333	93.7992	Turonian	2240000	650000	1710000	1060000	46400000	8360000	0.0370738	0.010758	0.0283019	0.0175439	0.767958	0.138365		0.944822	3.74528	0.04	0.0587831	4.60526	78.8679	0.152666	1.61321	0.709677	0.0809288		2.09458	17.5792	8.57367
BASS RIVER	39°36′N	74°26′W	39.6	-74.4333	93.8338	Turonian	2780000	856000	2020000	1270000	44900000	7350000	0.0469785	0.0144653	0.0341355	0.0214614	0.758754	0.124206		0.925539	3.67896	0.05	0.0735159	5.83054	72.5568	0.14067	1.59055	0.639353	0.0423655		1.91465	17.8443	8.52962
BASS RIVER	39°36′N	74°26′W	39.6	-74.4333	93.8595	Turonian	2660000	924000	2380000	1520000	72800000	12700000	0.0286071	0.00993719	0.0255958	0.0163469	0.78293	0.136583		0.947272	3.78822	0.04	0.0534077	3.52505	82.6823	0.148538	1.56579	0.72472	0.0514971		2.1373	17.0951	8.59717
BASS RIVER	39°36′N	74°26′W	39.6	-74.4333	93.8764	Turonian	6950000	1020000	2620000	1310000	48400000	8120000	0.101578	0.0149079	0.0382929	0.0191464	0.707395	0.118679		0.921959	3.45323	0.04	0.0805271	12.5565	53.8819	0.143666	2	0.62127	0.248888		1.54005	19.7176	8.11863
BASS RIVER	39°36′N	74°26′W	39.6	-74.4333	93.9021	Cenomanian	2380000	895000	2280000	1340000	45500000	7500000	0.0397362	0.0149428	0.0380666	0.0223725	0.759663	0.125219		0.92551	3.69772	0.05	0.0785013	4.97076	75.9109	0.141509	1.70149	0.62422	0.0234434		1.93507	17.8281	8.51776
BASS RIVER	39°36′N	74°26′W	39.6	-74.4333	93.9448	Cenomanian	2570000	953000	2370000	1410000	38600000	6620000	0.0489309	0.0181444	0.0451231	0.0268454	0.734916	0.12604		0.916057	3.63275	0.05	0.0947491	6.24241	72.0348	0.146395	1.68085	0.583106	0.0378996		1.89803	17.9648	8.50062
BASS RIVER	39°36′N	74°26′W	39.6	-74.4333	93.9794	Cenomanian	4100000	1000000	2570000	1570000	57600000	9660000	0.0535948	0.0130719	0.0335948	0.0205229	0.752941	0.126275		0.932432	3.65869	0.04	0.0709945	6.64506	70.2035	0.143622	1.63694	0.652703	0.0998426		1.86209	18.0754	8.50524
BASS RIVER	39°36′N	74°26′W	39.6	-74.4333	93.9958	Cenomanian	2170000	907000	2200000	1290000	35900000	5760000	0.0449955	0.0188069	0.0456176	0.0267485	0.744396	0.119435		0.910702	3.64561	0.05	0.0954687	5.70003	72.6356	0.138262	1.70543	0.567097	-0.0033187		1.89003	17.9598	8.49167
BASS RIVER	39°36′N	74°26′W	39.6	-74.4333	94.014	Cenomanian	7260000	1070000	2590000	1460000	45200000	8050000	0.11062	0.0163035	0.0394637	0.0222459	0.688709	0.122657		0.918755	3.40744	0.04	0.0877163	13.8391	52.58	0.151174	1.77397	0.611238	0.277569		1.67883	18.6507	8.30586
BASS RIVER	39°36′N	74°26′W	39.6	-74.4333	94.0216	Cenomanian	3680000	607000	1380000	772000	19800000	3490000	0.123785	0.0204178	0.0464193	0.0259679	0.666016	0.117394		0.902864	3.3248	0.05	0.105916	15.6729	48.675	0.14985	1.78756	0.558489	0.276339		1.5984	18.9876	8.22946
BASS RIVER	39°36′N	74°26′W	39.6	-74.4333	94.0308	Cenomanian	6300000	1210000	2820000	1660000	58100000	10200000	0.0784656	0.0150704	0.0351227	0.0206751	0.723627	0.127039		0.923851	3.55001	0.04	0.0769023	9.78261	61.8182	0.149341	1.6988	0.641913	0.162253		1.72743	18.4975	8.40223
BASS RIVER	39°36′N	74°26′W	39.6	-74.4333	94.0397	Cenomanian	2290000	730000	1720000	1010000	34400000	5290000	0.0503961	0.0160651	0.0378521	0.0222271	0.757042	0.116417		0.916571	3.65229	0.05	0.0801854	6.24148	69.7889	0.133283	1.70297	0.604571	0.0210938		1.85674	18.0093	8.47291
BASS RIVER	39°36′N	74°26′W	39.6	-74.4333	94.0473	Cenomanian	3140000	996000	2500000	1490000	50200000	8410000	0.0470511	0.0149245	0.037461	0.0223268	0.752218	0.126019		0.925649	3.66977	0.04	0.0784012	5.88676	72.8139	0.143491	1.67785	0.627799	0.0521418		1.9119	17.8697	8.50743
BASS RIVER	39°36′N	74°26′W	39.6	-74.4333	94.0566	Cenomanian	3900000	1420000	3070000	1740000	55500000	8210000	0.0528169	0.0192308	0.0415764	0.0235645	0.751625	0.111186		0.901662	3.62432	0.04	0.0890764	6.56566	67.7952	0.128865	1.76437	0.56856	-0.0294611		1.75995	18.0474	8.41758
BASS RIVER	39°36′N	74°26′W	39.6	-74.4333	94.0654	Cenomanian	1390000	472000	1130000	656000	18700000	3030000	0.0547718	0.0185988	0.0445268	0.0258492	0.736859	0.119395		0.910741	3.61021	0.05	0.0941304	6.91887	68.552	0.139439	1.72256	0.572995	0.0322887		1.84217	18.0399	8.45217
BASS RIVER	39°36′N	74°26′W	39.6	-74.4333	94.073	Cenomanian	3030000	975000	2280000	1320000	37100000	6220000	0.0594993	0.0191458	0.0447717	0.0259205	0.728522	0.12214		0.90968	3.5891	0.05	0.0955215	7.55046	67.2432	0.143583	1.72727	0.576193	0.0478057		1.82713	18.1373	8.43419
BASS RIVER	39°36′N	74°26′W	39.6	-74.4333	94.0823	Cenomanian	2060000	798000	1810000	1020000	31900000	5020000	0.0483477	0.0187289	0.0424803	0.0239392	0.748686	0.117818		0.907724	3.64152	0.05	0.0894742	6.06596	70.904	0.13597	1.77451	0.580481	-0.0149118		1.77622	17.9928	8.43786
BASS RIVER	39°36′N	74°26′W	39.6	-74.4333	94.0912	Cenomanian	4150000	1520000	3330000	1980000	63400000	9570000	0.0494342	0.018106	0.0396665	0.0235855	0.755211	0.113996		0.907317	3.64503	0.05	0.085589	6.1436	69.7522	0.13115	1.68182	0.583537	-0.0205564		1.83529	17.8314	8.47615
BASS RIVER	39°36′N	74°26′W	39.6	-74.4333	94.0988	Cenomanian	2350000	1020000	2590000	1560000	44600000	7620000	0.0393371	0.017074	0.0433545	0.0261132	0.746568	0.127553		0.92025	3.67861	0.05	0.0900854	5.00532	76.4293	0.145921	1.66026	0.595778	0.0143767		1.97385	17.7188	8.53407
BASS RIVER	39°36′N	74°26′W	39.6	-74.4333	94.1081	Cenomanian	1940000	600000	1380000	784000	22700000	3730000	0.0623113	0.0192715	0.0443245	0.0251815	0.729106	0.119805		0.907607	3.57911	0.05	0.094677	7.87338	65.7848	0.141128	1.7602	0.574376	0.0468846		1.75726	18.1776	8.40178
BASS RIVER	39°36′N	74°26′W	39.6	-74.4333	94.1182	Cenomanian	2710000	1100000	2750000	1630000	50400000	8570000	0.0403514	0.0163788	0.040947	0.0242704	0.750447	0.127606		0.921708	3.68329	0.04	0.0850272	5.10262	75.9752	0.145328	1.68712	0.609964	0.0174837		1.89489	17.6941	8.52055
BASS RIVER	39°36′N	74°26′W	39.6	-74.4333	94.1245	Cenomanian	5480000	970000	2360000	1320000	39700000	5770000	0.0985612	0.017446	0.042446	0.023741	0.714029	0.103777		0.90691	3.44478	0.04	0.0927773	12.1293	51.2889	0.126897	1.78788	0.553743	0.177547		1.65538	18.4946	8.28725
BASS RIVER	39°36′N	74°26′W	39.6	-74.4333	94.1338	Cenomanian	10500000	2030000	4810000	2730000	85500000	13300000	0.0883318	0.0170775	0.0404644	0.0229663	0.719273	0.111887		0.911237	3.49155	0.04	0.0883086	10.9375	55.8824	0.134615	1.7619	0.581548	0.153576		1.71014	18.4217	8.33129
BASS RIVER	39°36′N	74°26′W	39.6	-74.4333	94.1431	Cenomanian	3750000	853000	2150000	1320000	61300000	10300000	0.0470674	0.0107063	0.0269853	0.0165677	0.769395	0.129278		0.941667	3.70907	0.04	0.0569393	5.7648	73.3096	0.143855	1.62879	0.70437	0.0998103		2.0015	17.464	8.53321
BASS RIVER	39°36′N	74°26′W	39.6	-74.4333	94.1503	Cenomanian	1610000	456000	1210000	699000	33200000	5830000	0.0374375	0.0106034	0.0281363	0.0162539	0.772003	0.135566		0.944356	3.74591	0.04	0.0571325	4.62511	78.3602	0.149372	1.73104	0.711409	0.0777378		2.03071	17.3782	8.55548
BASS RIVER	39°36′N	74°26′W	39.6	-74.4333	94.1596	Cenomanian	2450000	727000	1830000	1070000	44900000	6730000	0.0424559	0.0125981	0.0317119	0.0185419	0.778069	0.116624		0.929806	3.71042	0.04	0.0656387	5.17423	73.3115	0.130351	1.71028	0.649802	0.0339027		1.92149	18.1407	8.50235
BASS RIVER	39°36′N	74°26′W	39.6	-74.4333	94.1697	Cenomanian	4870000	1680000	4230000	2570000	107000000	17400000	0.0353539	0.012196	0.0307078	0.018657	0.77677	0.126316		0.935085	3.74192	0.04	0.063817	4.35327	78.132	0.139871	1.64591	0.672334	0.0310156		1.99149	17.8806	8.55033
BASS RIVER	39°36′N	74°26′W	39.6	-74.4333	94.1811	Cenomanian	4630000	649000	1690000	908000	36800000	6160000	0.0910754	0.0127663	0.0332435	0.017861	0.723882	0.121172		0.931009	3.51305	0.03	0.0702707	11.1755	57.0899	0.143389	1.86123	0.654832	0.237773		1.65664	19.0386	8.27051
BASS RIVER	39°36′N	74°26′W	39.6	-74.4333	94.198	Cenomanian	1800000	736000	1950000	1150000	40400000	6620000	0.0341841	0.0139775	0.0370328	0.0218399	0.767244	0.125722		0.92961	3.72543	0.04	0.0754287	4.2654	78.6223	0.140791	1.69565	0.633129	0.017834		1.94643	17.805	8.5375
BASS RIVER	39°36′N	74°26′W	39.6	-74.4333	94.2199	Cenomanian	3190000	1130000	2780000	1690000	65100000	9950000	0.0380487	0.0134781	0.0331584	0.0201574	0.776479	0.118678		0.927331	3.7209	0.03	0.0694358	4.67125	75.723	0.132578	1.64497	0.639871	0.0100692		1.91513	17.981	8.53248
BASS RIVER	39°36′N	74°26′W	39.6	-74.4333	94.2275	Cenomanian	3530000	1200000	2570000	1840000	64300000	10300000	0.0421543	0.0143301	0.0306902	0.0219728	0.767853	0.123		0.924576	3.70504	0.03	0.0699414	5.20419	74.4758	0.13807	1.39674	0.647392	0.0111071		2.05368	17.4442	8.58692
BASS RIVER	39°36′N	74°26′W	39.6	-74.4333	94.2364	Cenomanian	1980000	722000	1720000	1190000	48600000	9670000	0.0309946	0.0113021	0.0269246	0.0186281	0.760778	0.151373		0.945722	3.76964	0.05	0.0586734	3.91459	83.0043	0.165952	1.44538	0.726958	0.0615339		2.15473	17.389	8.61543
BASS RIVER	39°36′N	74°26′W	39.6	-74.4333	94.2444	Cenomanian	7110000	3320000	5420000	2460000	71700000	10100000	0.0710219	0.0331635	0.0541404	0.024573	0.716212	0.100889		0.844131	3.48357	0.04	0.12043	9.0217	58.6868	0.123472	2.20325	0.474178	-0.177857		1.30196	19.7901	7.68127
BASS RIVER	39°36′N	74°26′W	39.6	-74.4333	94.2532	Cenomanian	6780000	2800000	6410000	3840000	124000000	18600000	0.0417411	0.0172382	0.0394632	0.023641	0.763406	0.114511		0.911532	3.67875	0.03	0.083842	5.18428	73.2861	0.130435	1.66927	0.587678	-0.0320748		1.88088	17.7076	8.50818
BASS RIVER	39°36′N	74°26′W	39.6	-74.4333	94.2621	Cenomanian	2350000	949000	1670000	807000	20400000	3020000	0.0804905	0.0325045	0.0571996	0.0276408	0.698726	0.103439		0.852777	3.43848	0.05	0.127617	10.3297	56.2384	0.12895	2.06939	0.468508	-0.0907244		1.36148	20.2484	7.82022
BASS RIVER	39°36′N	74°26′W	39.6	-74.4333	94.2701	Cenomanian	1920000	873000	2080000	1180000	33400000	4820000	0.0433673	0.0197186	0.0469812	0.0266528	0.75441	0.10887		0.902491	3.64676	0.04	0.0975846	5.43601	71.5134	0.126112	1.76271	0.538367	-0.0475723		1.85507	18.0408	8.46043
BASS RIVER	39°36′N	74°26′W	39.6	-74.4333	94.2777	Cenomanian	4820000	2360000	4740000	2670000	57100000	7980000	0.0604996	0.0296222	0.0594954	0.0335132	0.716706	0.100163		0.867042	3.51663	0.04	0.130528	7.78424	62.3438	0.122618	1.77528	0.449577	-0.0984029		2.05549	18.3167	8.58278
BASS RIVER	39°36′N	74°26′W	39.6	-74.4333	94.2878	Cenomanian	2120000	1030000	1870000	1060000	19200000	2500000	0.0763139	0.037077	0.0673146	0.0381569	0.691145	0.0899928		0.840557	3.41073	0.06	0.154326	9.94371	54.1126	0.115207	1.76415	0.386997	-0.122255		1.49591	20.2346	8.25054
BASS RIVER	39°36′N	74°26′W	39.6	-74.4333	94.2971	Cenomanian	3140000	1410000	2860000	1590000	38100000	5440000	0.059764	0.0268367	0.0544347	0.0302627	0.725162	0.10354		0.875221	3.5413	0.04	0.118623	7.61397	63.4033	0.124943	1.79874	0.481416	-0.0820617		1.79421	18.638	8.44919
BASS RIVER	39°36′N	74°26′W	39.6	-74.4333	94.3047	Cenomanian	5100000	2230000	4620000	2700000	68500000	10200000	0.0546331	0.0238886	0.0494912	0.0289234	0.733798	0.109266		0.887089	3.5819	0.06	0.108215	6.92935	66.6667	0.129606	1.71111	0.516456	-0.0623593		1.81578	18.3208	8.46498
BASS RIVER	39°36′N	74°26′W	39.6	-74.4333	94.3123	Cenomanian	5550000	2380000	6010000	3310000	89000000	12600000	0.0466975	0.0200252	0.0505679	0.0278502	0.748843	0.106016		0.902058	3.62415	0.06	0.103266	5.86991	69.4215	0.124016	1.81571	0.518519	-0.0272221		1.77557	18.3325	8.43487
BASS RIVER	39°36′N	74°26′W	39.6	-74.4333	94.3229	Cenomanian	3510000	1440000	2870000	1470000	45500000	6560000	0.0572127	0.0234719	0.0467808	0.0239609	0.741646	0.106927		0.883306	3.58321	0.05	0.0999308	7.1618	65.144	0.126008	1.95238	0.531605	-0.0829932		1.58114	18.589	8.23135
BASS RIVER	39°36′N	74°26′W	39.6	-74.4333	94.3305	Cenomanian	3840000	1540000	3560000	2020000	63200000	9390000	0.0459605	0.0184321	0.0426092	0.0241771	0.756433	0.112388		0.906723	3.65147	0.05	0.0893238	5.72792	70.9751	0.129357	1.76238	0.568746	-0.0301152		1.79225	17.9171	8.45127
BASS RIVER	39°36′N	74°26′W	39.6	-74.4333	94.3393	Cenomanian	5480000	2020000	4740000	2800000	90700000	13400000	0.0459963	0.0169548	0.0397851	0.0235018	0.761289	0.112473		0.912021	3.66208	0.05	0.0841105	5.69765	70.9746	0.128722	1.69286	0.583624	-0.0128176		1.85361	17.7973	8.48836
BASS RIVER	39°36′N	74°26′W	39.6	-74.4333	94.3486	Cenomanian	4850000	1520000	3920000	2270000	84500000	12500000	0.044268	0.0138737	0.0357795	0.0207192	0.771267	0.114093		0.92479	3.68903	0.05	0.0736319	5.42809	72.0461	0.128866	1.72687	0.618506	0.0282666		1.83992	18.1701	8.48842
BASS RIVER	39°36′N	74°26′W	39.6	-74.4333	94.3549	Cenomanian	6110000	1870000	4920000	2890000	106000000	15800000	0.0444073	0.0135911	0.0357584	0.0210044	0.770405	0.114834		0.926609	3.68908	0.04	0.0736234	5.45	72.1132	0.129721	1.70242	0.620094	0.0380015		1.85936	18.075	8.49972
BASS RIVER	39°36′N	74°26′W	39.6	-74.4333	94.3638	Cenomanian	2280000	722000	1900000	1110000	46300000	7920000	0.0378536	0.011987	0.0315447	0.0184287	0.768694	0.131492		0.938036	3.73111	0.04	0.0643981	4.69329	77.6471	0.146072	1.71171	0.679712	0.0579143		1.97198	17.9659	8.53882
BASS RIVER	39°36′N	74°26′W	39.6	-74.4333	94.3744	Cenomanian	2050000	699000	1650000	1000000	36800000	5920000	0.0426027	0.0145265	0.03429	0.0207818	0.764771	0.123028		0.924587	3.69665	0.04	0.0726953	5.27671	74.2785	0.138577	1.65	0.638688	0.0195608		1.88642	17.9947	8.51894
BASS RIVER	39°36′N	74°26′W	39.6	-74.4333	94.3819	Cenomanian	2170000	883000	2160000	1290000	43300000	7000000	0.0382022	0.015545	0.0380262	0.0227101	0.762284	0.123233		0.922086	3.70179	0.03	0.079311	4.77238	76.3359	0.139165	1.67442	0.617665	0.00100496		1.94047	17.7407	8.52615
BASS RIVER	39°36′N	74°26′W	39.6	-74.4333	94.3908	Cenomanian	1210000	455000	1140000	688000	24300000	4080000	0.0379632	0.0142754	0.035767	0.0215857	0.762401	0.128008		0.928493	3.7122	0.03	0.0744546	4.74324	77.1267	0.143763	1.65698	0.641207	0.0250275		1.93528	17.82	8.53786
BASS RIVER	39°36′N	74°26′W	39.6	-74.4333	94.4014	Cenomanian	1620000	673000	1680000	1040000	35100000	5900000	0.0352074	0.0146263	0.0365114	0.0226023	0.762828	0.128225		0.92758	3.71967	0.03	0.076431	4.41176	78.4574	0.143902	1.61538	0.634886	0.0126401		2.00572	17.6066	8.55666
BASS RIVER	39°36′N	74°26′W	39.6	-74.4333	94.4166	Cenomanian	632000	229000	506000	301000	10200000	1790000	0.0462732	0.0167667	0.0370479	0.0220384	0.746815	0.131059		0.918967	3.66847	0.04	0.0795332	5.83456	73.9059	0.149291	1.68106	0.633404	0.0176625		1.8863	17.9339	8.50044
BASS RIVER	39°36′N	74°26′W	39.6	-74.4333	94.4258	Cenomanian	1430000	562000	1350000	825000	24500000	4380000	0.0432717	0.0170061	0.0408509	0.0249644	0.741368	0.132539		0.921034	3.66923	0.04	0.0865674	5.51485	75.3873	0.151662	1.63636	0.615428	0.027944		1.92798	17.6541	8.5335
BASS RIVER	39°36′N	74°26′W	39.6	-74.4333	94.4423	Cenomanian	1430000	638000	1350000	762000	18800000	2840000	0.0553834	0.0247095	0.0522851	0.029512	0.728118	0.109992		0.885868	3.57026	0.04	0.112751	7.06871	66.5105	0.131238	1.77165	0.50805	-0.0569657		1.78565	18.5119	8.44914
BASS RIVER	39°36′N	74°26′W	39.6	-74.4333	94.4512	Cenomanian	787000	415000	1090000	710000	20200000	3360000	0.0296288	0.0156238	0.0410361	0.0267299	0.760485	0.126496		0.925561	3.72581	0.05	0.085936	3.74994	81.0224	0.142615	1.53521	0.602691	-0.00437406		2.09526	17.3939	8.59542
BASS RIVER	39°36′N	74°26′W	39.6	-74.4333	94.4579	Cenomanian	2050000	556000	1210000	711000	20900000	3620000	0.0705753	0.0191414	0.0416566	0.0244776	0.719524	0.124626		0.908808	3.55248	0.04	0.0917509	8.93246	63.8448	0.147635	1.70183	0.593735	0.0798261		1.76058	18.0945	8.41617
BASS RIVER	39°36′N	74°26′W	39.6	-74.4333	94.468	Cenomanian	1120000	450000	1070000	658000	18300000	3220000	0.0451285	0.018132	0.0431139	0.026513	0.737368	0.129745		0.916636	3.65235	0.04	0.0919065	5.76725	74.1935	0.149628	1.62614	0.596517	0.0213756		1.96435	17.7708	8.53106
BASS RIVER	39°36′N	74°26′W	39.6	-74.4333	94.4769	Cenomanian	810000	354000	801000	503000	13700000	2120000	0.0442913	0.019357	0.0437992	0.0275044	0.749125	0.115923		0.9063	3.64966	0.04	0.0948621	5.58236	72.3549	0.134008	1.59245	0.561143	-0.0305334		1.95525	17.7534	8.54059
BASS RIVER	39°36′N	74°26′W	39.6	-74.4333	94.4849	Cenomanian	184000	59100	99900	58200	1280000	179000	0.0989141	0.0317708	0.0537039	0.031287	0.688098	0.0962262		0.850833	3.37034	0.06	0.129579	12.5683	49.3113	0.122687	1.71649	0.451792	-0.0320746		1.84667	19.0343	8.44133
BRAZOS RIVER	31°8′N	96°49′W	31.1333	-96.8167	66.67	Maastrichtian	37600	9100	12100	5850	137000	9800	0.17782	0.0430362	0.0572239	0.0276661	0.647907	0.0463467		0.753053	3.0175	0.112292	0.155594	21.5349	20.6751	0.0667575	2.06838	0.265943	-0.124615		1.19103	20.3395	7.53589
BRAZOS RIVER	31°8′N	96°49′W	31.1333	-96.8167	66.67	Maastrichtian	523000	119000	149000	83100	1910000	121000	0.180028	0.0409624	0.0512891	0.0286049	0.657464	0.0416509		0.747935	3.02582	0.123491	0.147391	21.4961	18.7888	0.0595766	1.79302	0.256302	-0.154497		1.45697	19.1785	8.07602
BRAZOS RIVER	31°8′N	96°49′W	31.1333	-96.8167	66.67	Maastrichtian	17700	4790	6320	1940	56000	3380	0.196383	0.0531455	0.0701209	0.0215245	0.621325	0.0375014		0.70846	2.89327	0.264706	0.180174	24.0163	16.0342	0.0569215	3.25773	0.205721	-0.182419		0.811091	25.1776	5.11196
BRAZOS RIVER	31°8′N	96°49′W	31.1333	-96.8167	66.67	Maastrichtian	319000	102000	128000	66600	1480000	115000	0.144305	0.0461413	0.0579028	0.0301276	0.669501	0.0520221		0.752187	3.13842	0.0664699	0.156798	17.7321	26.4977	0.0721003	1.92192	0.279397	-0.249203		1.43009	20.2172	8.0056
BRAZOS RIVER	31°8′N	96°49′W	31.1333	-96.8167	66.67	Maastrichtian	144000	49100	61100	31900	715000	57800	0.13599	0.0463689	0.0577014	0.0301256	0.675229	0.0545849		0.754377	3.1714	0.13017	0.155318	16.7637	28.6422	0.074793	1.91536	0.289145	-0.272913		1.42862	20.1805	8.00813
BRAZOS RIVER	31°8′N	96°49′W	31.1333	-96.8167	66.67	Maastrichtian	83900	47200	60100	21700	290000	6290	0.164771	0.0926962	0.118031	0.0426167	0.569532	0.012353		0.65112	2.78415	0.3489	0.303322	22.4392	6.97417	0.0212292	2.76959	0.0464927	-0.287972		1.80842	19.4158	8.46983
BRAZOS RIVER	31°8′N	96°49′W	31.1333	-96.8167	66.67	Maastrichtian	94900	36000	43700	22400	479000	41300	0.132302	0.0501882	0.0609229	0.0312282	0.667782	0.057577		0.748954	3.16715	0.0741636	0.164042	16.536	30.3231	0.0793773	1.95089	0.288006	-0.291555		1.56165	20.4706	8.08756
BRAZOS RIVER	31°8′N	96°49′W	31.1333	-96.8167	66.67	Maastrichtian	45200	16700	21300	11400	233000	17200	0.13109	0.0484339	0.0617749	0.0330626	0.675754	0.049884		0.749249	3.17372	0.166816	0.164887	16.2473	27.5641	0.068745	1.86842	0.258258	-0.296883		1.40919	20.5799	8.08416
BRAZOS RIVER	31°8′N	96°49′W	31.1333	-96.8167	66.67	Maastrichtian	307000	123000	171000	88000	1960000	161000	0.109253	0.0437722	0.0608541	0.0313167	0.697509	0.0572954		0.773481	3.27865	0.0677765	0.152617	13.5421	34.4017	0.0759076	1.94318	0.296501	-0.297964		1.63917	20.0016	8.21964
BRAZOS RIVER	31°8′N	96°49′W	31.1333	-96.8167	66.67	Maastrichtian	1170000	481000	651000	354000	6900000	530000	0.116002	0.0476899	0.0645449	0.0350982	0.684117	0.0525481		0.761409	3.22873	0.0811639	0.166667	14.4981	31.1765	0.0713324	1.83898	0.262897	-0.30027		1.15545	21.2184	7.75335
BRAZOS RIVER	31°8′N	96°49′W	31.1333	-96.8167	Danian	Danian	3970000	220000	165000	83600	4710000	104000	0.429069	0.0237771	0.0178328	0.0090353	0.509046	0.0112401		0.615788	2.16769	0.0740195	0.0887063	45.7373	2.55277	0.0216037	1.97368	0.181628	0.207076		0.477931	8.13237	3.99724
BRAZOS RIVER	31°8′N	96°49′W	31.1333	-96.8167	Danian	Danian	154000	49900	59100	27100	406000	31800	0.211568	0.0685534	0.0811925	0.0372304	0.557769	0.0436873		0.702799	2.74845	0.11039	0.237149	27.5	17.1152	0.0726359	2.18081	0.189398	-0.0597728		0.36571	24.3408	5.08707
BRAZOS RIVER	31°8′N	96°49′W	31.1333	-96.8167	Danian	Danian	1570000	335000	433000	222000	4910000	295000	0.202189	0.0431423	0.055763	0.0285898	0.632325	0.037991		0.7393	2.9217	0.154512	0.159806	24.2284	15.8177	0.0566763	1.95045	0.229572	-0.0863684		1.43596	19.4709	7.99342
BRAZOS RIVER	31°8′N	96°49′W	31.1333	-96.8167	Danian	Danian	529000	139000	226000	115000	2590000	191000	0.139578	0.0366755	0.0596306	0.030343	0.683377	0.0503958		0.792846	3.18206	0.0960807	0.147194	16.9606	26.5278	0.0686803	1.96522	0.28465	-0.115579		1.50391	20.1445	8.11146
BRAZOS RIVER	31°8′N	96°49′W	31.1333	-96.8167	Danian	Danian	367000	84300	88400	47900	1050000	65400	0.215502	0.0495009	0.0519084	0.0281268	0.616559	0.0384028		0.705245	2.85755	0.0809789	0.16512	25.8998	15.1249	0.0586337	1.84551	0.228671	-0.159315		1.5071	18.8392	7.99458
BRAZOS RIVER	31°8′N	96°49′W	31.1333	-96.8167	Danian	Danian	75500	22100	24900	13300	247000	17500	0.188609	0.0552086	0.0622033	0.0332251	0.617037	0.0437172		0.715938	2.92231	0.247983	0.185653	23.4109	18.8172	0.0661626	1.87218	0.224936	-0.181856		1.17443	21.2144	7.70742
BRAZOS RIVER	31°8′N	96°49′W	31.1333	-96.8167	Danian	Danian	448000	127000	152000	76000	1610000	113000	0.177356	0.0502771	0.0601742	0.0300871	0.637371	0.0447348		0.728632	2.98931	0.0822289	0.170837	21.7687	20.1426	0.0655833	2	0.241453	-0.197753		1.43044	20.39	7.97147
BRAZOS RIVER	31°8′N	96°49′W	31.1333	-96.8167	Danian	Danian	144000	49600	59100	27400	486000	31900	0.180451	0.0621554	0.0740602	0.0343358	0.609023	0.0399749		0.704762	2.90927	0.139488	0.208104	22.8571	18.1353	0.0615949	2.15693	0.189881	-0.212931		0.795244	22.8436	6.63345
BRAZOS RIVER	31°8′N	96°49′W	31.1333	-96.8167	Danian	Danian	752000	292000	447000	276000	4730000	348000	0.109861	0.0426589	0.0653031	0.0403214	0.691015	0.05084		0.785767	3.26165	0.357162	0.166585	13.7176	31.6364	0.0685309	1.61957	0.255319	-0.226826		1.06758	23.4857	7.10912
BRAZOS RIVER	31°8′N	96°49′W	31.1333	-96.8167	Danian	Danian	1500000	869000	1380000	1100000	12300000	923000	0.0830013	0.0480854	0.0763612	0.0608676	0.680611	0.0510735		0.796582	3.31015	0.0957212	0.202088	10.8696	38.0933	0.0698026	1.25455	0.216058	-0.226832		1.80741	17.9666	8.53572
BRAZOS RIVER	31°8′N	96°49′W	31.1333	-96.8167	Danian	Danian	141000	59900	88100	44400	920000	86900	0.1052	0.0446915	0.0657316	0.0331269	0.686413	0.0648362		0.785535	3.28053	0.156041	0.160427	13.2893	38.1308	0.0863045	1.98423	0.311135	-0.246738		1.54477	20.3334	8.22149
BRAZOS RIVER	31°8′N	96°49′W	31.1333	-96.8167	Danian	Danian	188000	59100	70000	37400	746000	51100	0.163251	0.0513199	0.060785	0.0324766	0.647794	0.044373		0.728401	3.03899	0.188601	0.17279	20.1285	21.3718	0.0641074	1.87166	0.234835	-0.248373		1.40167	20.7037	8.02483
BRAZOS RIVER	31°8′N	96°49′W	31.1333	-96.8167	Danian	Danian	876000	639000	1240000	722000	9540000	663000	0.0640351	0.0467105	0.0906433	0.0527778	0.697368	0.0484649		0.804228	3.36966	0.24579	0.20314	8.41014	43.0799	0.0649809	1.71745	0.203125	-0.251601		0.605935	25.2229	5.90862
BRAZOS RIVER	31°8′N	96°49′W	31.1333	-96.8167	Danian	Danian	94100	41700	75200	33500	740000	55600	0.0904721	0.0400923	0.0723007	0.0322084	0.71147	0.0534564		0.797573	3.34102	0.140933	0.158985	11.2816	37.1409	0.0698844	2.24478	0.269903	-0.25323		1.7471	20.3162	8.23952
BRAZOS RIVER	31°8′N	96°49′W	31.1333	-96.8167	Danian	Danian	70700	31600	40700	23800	384000	33800	0.120937	0.0540541	0.0696203	0.0407116	0.656859	0.0578173		0.756736	3.17414	0.110946	0.187001	15.5487	32.3445	0.0809	1.71008	0.2602	-0.265627		0.924555	24.8736	6.42545
BRAZOS RIVER	31°8′N	96°49′W	31.1333	-96.8167	Danian	Danian	84900	36200	57400	26300	623000	54100	0.0962694	0.0410477	0.0650867	0.029822	0.706429	0.0613448		0.791954	3.33178	0.0572605	0.150439	11.9932	38.9209	0.0798996	2.18251	0.31092	-0.269314		1.34655	20.739	7.81386
BRAZOS RIVER	31°8′N	96°49′W	31.1333	-96.8167	Danian	Danian	45500	16700	20800	10500	206000	15300	0.144536	0.0530496	0.0660737	0.0333545	0.654384	0.0486023		0.736177	3.0972	0.150165	0.17824	18.0915	25.1645	0.0691369	1.98095	0.241706	-0.274765		1.215	21.401	7.75773
BRAZOS RIVER	31°8′N	96°49′W	31.1333	-96.8167	Danian	Danian	62100	24500	29600	15000	278000	22200	0.14395	0.0567918	0.0686138	0.0347705	0.644414	0.0514604		0.731654	3.08183	0.173529	0.187111	18.2593	26.3345	0.0739507	1.97333	0.243154	-0.277946		0.900106	22.4335	7.02845
BRAZOS RIVER	31°8′N	96°49′W	31.1333	-96.8167	Danian	Danian	341000	197000	338000	141000	3010000	285000	0.0790816	0.0456865	0.0783859	0.0326994	0.698052	0.0660946		0.795005	3.35714	0.0911561	0.170234	10.1761	45.5272	0.0864947	2.39716	0.296566	-0.280946		1.72562	20.5396	8.21356
BRAZOS RIVER	31°8′N	96°49′W	31.1333	-96.8167	Danian	Danian	433000	206000	284000	119000	2130000	158000	0.13003	0.0618619	0.0852853	0.0357357	0.63964	0.0474474		0.731421	3.08799	0.148715	0.210217	16.8943	26.7343	0.0690559	2.38655	0.205997	-0.285059		0.785516	23.0115	6.6683
BRAZOS RIVER	31°8′N	96°49′W	31.1333	-96.8167	Danian	Danian	126000	53200	67400	35100	652000	54500	0.127505	0.0538353	0.0682048	0.0355191	0.659785	0.0551508		0.746908	3.15655	0.167837	0.180585	16.1954	30.1939	0.0771408	1.92023	0.259277	-0.289534		0.921372	22.335	7.13325
BRAZOS RIVER	31°8′N	96°49′W	31.1333	-96.8167	Danian	Danian	107000	44700	51900	28200	457000	33400	0.148158	0.0618942	0.0718637	0.0390474	0.632789	0.0462476		0.717446	3.03891	0.118611	0.202861	18.9716	23.7892	0.0681077	1.84043	0.211125	-0.292442		0.572297	25.5521	5.49158
BRAZOS RIVER	31°8′N	96°49′W	31.1333	-96.8167	Danian	Danian	340000	202000	338000	143000	2840000	255000	0.0825644	0.0490529	0.0820787	0.0347256	0.689655	0.0619233		0.784648	3.3237	0.147173	0.180783	10.6918	42.8571	0.082391	2.36364	0.271855	-0.293846		1.38622	20.6042	8.12393
BRAZOS RIVER	31°8′N	96°49′W	31.1333	-96.8167	Danian	Danian	100000	43200	52900	29400	500000	39800	0.130668	0.0564485	0.0691232	0.0384163	0.653339	0.0520057		0.738657	3.13132	0.151651	0.188637	16.6667	28.4692	0.073731	1.79932	0.240774	-0.298648		0.729604	24.4171	6.28792
BRAZOS RIVER	31°8′N	96°49′W	31.1333	-96.8167	Danian	Danian	118000	49100	60500	31900	575000	42900	0.134488	0.0559608	0.0689537	0.0363574	0.655345	0.0488945		0.733731	3.1199	0.149534	0.186331	17.0274	26.6625	0.0694287	1.89655	0.232646	-0.307513		0.737616	23.2677	6.519
BRAZOS RIVER	31°8′N	96°49′W	31.1333	-96.8167	Danian	Danian	410000	306000	480000	341000	4310000	319000	0.0664937	0.049627	0.0778463	0.0553033	0.698994	0.0517353		0.788382	3.37415	0.390296	0.195796	8.68644	43.7586	0.0689134	1.40762	0.220609	-0.327671		0.592052	24.0438	5.88575
BRAZOS RIVER	31°8′N	96°49′W	31.1333	-96.8167	Danian	Danian	81400	33500	39200	21100	404000	32000	0.133181	0.0548102	0.0641361	0.0345223	0.660995	0.052356		0.733704	3.14005	0.0996412	0.177048	16.7697	28.2187	0.0733945	1.85782	0.254372	-0.327776		1.06601	21.6428	7.51003
BRAZOS RIVER	31°8′N	96°49′W	31.1333	-96.8167	Danian	Danian	220000	107000	155000	108000	1540000	83600	0.0993856	0.0483375	0.0700217	0.0487893	0.695699	0.0377665		0.764109	3.26861	0.379283	0.185594	12.5	27.5362	0.0514905	1.43519	0.184303	-0.328551		0.750636	26.3735	6.09248
BRAZOS RIVER	31°8′N	96°49′W	31.1333	-96.8167	Danian	Danian	289000	115000	142000	75600	1520000	112000	0.128239	0.0510295	0.0630103	0.0335463	0.674476	0.0496983		0.741341	3.17439	0.0659604	0.169297	15.9757	27.9302	0.0686275	1.87831	0.251912	-0.330595		1.30118	20.857	7.95525
BRAZOS RIVER	31°8′N	96°49′W	31.1333	-96.8167	Danian	Danian	333000	219000	360000	150000	2780000	218000	0.0820197	0.0539409	0.08867	0.0369458	0.684729	0.0536946		0.768743	3.29581	0.133389	0.1956	10.6971	39.5644	0.0727151	2.4	0.230201	-0.335737		1.20244	21.2022	7.86357
BRAZOS RIVER	31°8′N	96°49′W	31.1333	-96.8167	Danian	Danian	220000	99700	135000	71400	1510000	124000	0.101847	0.0461553	0.0624971	0.033054	0.699042	0.0574047		0.768193	3.2961	0.0559727	0.157775	12.7168	36.0465	0.0758874	1.89076	0.288305	-0.338404		1.58577	19.9743	8.28322
BRAZOS RIVER	31°8′N	96°49′W	31.1333	-96.8167	Danian	Danian	182000	107000	173000	89800	1770000	142000	0.0738696	0.0434288	0.0702167	0.0364478	0.718402	0.0576345		0.790934	3.39735	0.192481	0.162065	9.32377	43.8272	0.0742678	1.9265	0.277452	-0.339459		1.39435	20.2253	8.18979
BRAZOS RIVER	31°8′N	96°49′W	31.1333	-96.8167	Danian	Danian	106000	45700	53800	30400	514000	35100	0.135032	0.0582166	0.068535	0.0387261	0.654777	0.0447134		0.72303	3.10943	0.324928	0.191311	17.0968	24.876	0.0639228	1.76974	0.212727	-0.340554		0.701059	24.8112	6.08505
BRAZOS RIVER	31°8′N	96°49′W	31.1333	-96.8167	Danian	Danian	408000	241000	389000	196000	3230000	184000	0.0877797	0.0518503	0.0836919	0.0421687	0.694923	0.0395869		0.761386	3.28378	0.227458	0.194811	11.215	31.0811	0.0538957	1.98469	0.182178	-0.355412		0.893983	23.7258	6.97567
BRAZOS RIVER	31°8′N	96°49′W	31.1333	-96.8167	Danian	Danian	170000	100000	158000	62400	1310000	97500	0.0895727	0.0526898	0.0832499	0.0328784	0.690237	0.0513726		0.760708	3.28426	0.196565	0.185427	11.4865	36.4486	0.0692718	2.53205	0.233309	-0.358799		1.57387	20.9604	8.11312
BRAZOS RIVER	31°8′N	96°49′W	31.1333	-96.8167	Danian	Danian	200033	131000	187000	102000	1730000	153000	0.0799162	0.0523365	0.0747094	0.0407506	0.691161	0.0611258		0.771379	3.33316	0.216627	0.182371	10.3642	43.3387	0.0812533	1.83333	0.267016	-0.361634		1.14149	22.7783	7.48035
BRAZOS RIVER	31°8′N	96°49′W	31.1333	-96.8167	Danian	Danian	75000	56900	93200	42600	677000	46200	0.0756888	0.0574225	0.0940559	0.0429912	0.683217	0.0466243		0.761825	3.29387	0.289984	0.210394	9.9734	38.1188	0.0638827	2.18779	0.193386	-0.363627		1.08644	22.5922	7.55894
BRAZOS RIVER	31°8′N	96°49′W	31.1333	-96.8167	Danian	Danian	204000	133000	189000	102000	1750000	153000	0.0806006	0.0525484	0.074674	0.0403003	0.691426	0.0604504		0.769497	3.3303	0.12078	0.182209	10.4401	42.8571	0.0803994	1.85294	0.265165	-0.366958		1.21325	22.6581	7.54654
BRAZOS RIVER	31°8′N	96°49′W	31.1333	-96.8167	Danian	Danian	750000	251000	246000	102000	2350000	119000	0.196438	0.0657412	0.0644316	0.0267156	0.615506	0.0311682		0.650418	2.86145	0.104079	0.195241	24.1935	13.6939	0.0481977	2.41176	0.165738	-0.367764		1.06141	21.0859	6.86024
BRAZOS RIVER	31°8′N	96°49′W	31.1333	-96.8167	Danian	Danian	104000	60100	92600	36200	684000	39700	0.102302	0.0591186	0.0910879	0.0356089	0.672831	0.0390517		0.737095	3.19565	0.291045	0.206991	13.198	27.627	0.054857	2.55801	0.173666	-0.369428		1.0959	21.6013	7.61227
BRAZOS RIVER	31°8′N	96°49′W	31.1333	-96.8167	Danian	Danian	228000	169000	236000	194000	2610000	208000	0.0625514	0.0463649	0.0647462	0.0532236	0.716049	0.0570645		0.790582	3.42798	0.308609	0.1753	8.03383	47.7064	0.0738112	1.21649	0.257745	-0.371664		0.577846	24.718	5.90451
BRAZOS RIVER	31°8′N	96°49′W	31.1333	-96.8167	Danian	Danian	244000	100000	117000	64500	1310000	92900	0.12653	0.0518565	0.0606721	0.0334474	0.67932	0.0481747		0.732906	3.18352	0.0661135	0.167122	15.7014	27.5749	0.06622	1.81395	0.24813	-0.374516		1.34749	20.585	8.03552
BRAZOS RIVER	31°8′N	96°49′W	31.1333	-96.8167	Danian	Danian	227000	126000	176000	81600	1470000	100000	0.1041	0.0577823	0.0807117	0.0374209	0.674126	0.0458589		0.739454	3.21141	0.122702	0.196355	13.3765	30.581	0.0636943	2.15686	0.206782	-0.375439		0.901816	22.8922	7.058
BRAZOS RIVER	31°8′N	96°49′W	31.1333	-96.8167	Danian	Danian	86600	60900	93000	44700	700000	45100	0.0840532	0.059109	0.090265	0.0433854	0.679414	0.0437737		0.750103	3.26254	0.265709	0.210448	11.0094	34.2445	0.0605288	2.08054	0.185064	-0.382113		0.940701	23.5294	7.12874
BRAZOS RIVER	31°8′N	96°49′W	31.1333	-96.8167	Danian	Danian	243000	218000	346000	216000	2900000	205000	0.0588663	0.0528101	0.0838178	0.0523256	0.702519	0.0496609		0.77868	3.38614	0.232053	0.200772	7.73147	45.7589	0.0660225	1.60185	0.208122	-0.382669		0.531632	25.8614	5.52053
BRAZOS RIVER	31°8′N	96°49′W	31.1333	-96.8167	Danian	Danian	492000	318000	453000	294000	4590000	329000	0.0759728	0.0491044	0.0699506	0.0453984	0.708771	0.050803		0.771879	3.3635	0.288813	0.177975	9.68123	40.0731	0.0668835	1.54082	0.236011	-0.389794		0.887088	24.1029	6.80714
BRAZOS RIVER	31°8′N	96°49′W	31.1333	-96.8167	Danian	Danian	1020000	895000	1380000	969000	12000000	756000	0.0599295	0.0525852	0.0810811	0.056933	0.705053	0.0444183		0.77625	3.38343	0.458728	0.20275	7.8341	42.5676	0.0592662	1.42415	0.189	-0.390631		0.928011	22.0267	7.06208
BRAZOS RIVER	31°8′N	96°49′W	31.1333	-96.8167	Danian	Danian	1110000	1030000	1700000	747000	10000000	465000	0.0737444	0.0684294	0.112942	0.049628	0.664364	0.0308929		0.738711	3.22422	0.365079	0.24939	9.991	29.5238	0.0444338	2.27577	0.11796	-0.391325		0.955653	22.2104	7.23349
BRAZOS RIVER	31°8′N	96°49′W	31.1333	-96.8167	Danian	Danian	156000	109000	159000	87500	1440000	110000	0.0756731	0.0528741	0.0771283	0.0424448	0.69852	0.0533592		0.765843	3.34198	0.234978	0.186565	9.77444	41.3534	0.0709677	1.81714	0.236305	-0.394451		0.932964	23.251	7.14845
BRAZOS RIVER	31°8′N	96°49′W	31.1333	-96.8167	Danian	Danian	184000	154000	210000	175000	2070000	148000	0.0625638	0.0523631	0.0714043	0.0595036	0.703842	0.050323		0.775837	3.39034	0.391355	0.195502	8.16327	44.5783	0.0667268	1.2	0.215429	-0.399354		1.50852	19.0159	8.28891
BRAZOS RIVER	31°8′N	96°49′W	31.1333	-96.8167	Danian	Danian	176000	170000	281000	149000	2060000	126000	0.0594193	0.0573937	0.0948683	0.0503038	0.695476	0.0425388		0.76584	3.3501	0.449051	0.215363	7.8712	41.7219	0.0576395	1.88591	0.173554	-0.402581		0.797745	24.9483	6.32511
BRAZOS RIVER	31°8′N	96°49′W	31.1333	-96.8167	Danian	Danian	197000	150000	247000	98800	1700000	92500	0.0792661	0.0603549	0.0993844	0.0397538	0.684022	0.0372188		0.745028	3.26335	0.137625	0.216667	10.3848	31.9516	0.0516039	2.5	0.157233	-0.404198		1.39785	21.302	8.02562
BRAZOS RIVER	31°8′N	96°49′W	31.1333	-96.8167	Danian	Danian	336000	314000	489000	333000	4250000	263000	0.0561404	0.0524645	0.0817043	0.0556391	0.710109	0.0439432		0.775554	3.399	0.351145	0.201098	7.32665	43.9065	0.0582761	1.46847	0.187991	-0.409247		0.682556	23.5229	6.22904
BRAZOS RIVER	31°8′N	96°49′W	31.1333	-96.8167	Danian	Danian	126000	109000	159000	87600	1440000	108000	0.0620812	0.0537052	0.0783406	0.0431612	0.709499	0.0532125		0.764884	3.39072	0.262786	0.186804	8.04598	46.1538	0.0697674	1.81507	0.232959	-0.447322		1.01156	22.6851	7.40284
BRAZOS RIVER	31°8′N	96°49′W	31.1333	-96.8167	Danian	Danian	1890000	1770000	2290000	1300000	15400000	735000	0.080821	0.0756895	0.097926	0.0555912	0.658542	0.0314304		0.709598	3.1982	0.212639	0.24936	10.9312	28	0.0455531	1.76154	0.120591	-0.482877		1.02725	22.1126	7.4589
CISMON	46°02'N	11°45'E	46.0333	11.75	124.119	Aptian	339000	50300	40100	10900	376000	13600	0.408483	0.0606097	0.0483191	0.0131341	0.453067	0.0163875		0.562228	2.07447	0.262861	0.206356	47.4126	3.85706	0.0349076	3.6789	0.118364	0.132071		0.528988	17.8093	3.93767
CISMON	46°02'N	11°45'E	46.0333	11.75	124.274	Aptian	1710000	471000	456000	143000	3880000	256000	0.247253	0.0681029	0.0659341	0.0206767	0.561018	0.0370156		0.644796	2.65414	0.0183428	0.205532	30.5903	13.0214	0.0618956	3.18881	0.193062	-0.180297		0.379618	24.9515	4.06251
CISMON	46°02'N	11°45'E	46.0333	11.75	124.337	Aptian	868000	144000	122000	31900	1020000	45800	0.388941	0.0645248	0.0546668	0.014294	0.457051	0.0205225		0.58103	2.12703	0.146444	0.21845	45.9746	5.01204	0.0429724	3.82445	0.133256	0.136392		0.402294	20.6131	4.00797
CISMON	46°02'N	11°45'E	46.0333	11.75	124.65	Aptian	425000	98200	96600	26300	959000	63900	0.254643	0.0588376	0.057879	0.0157579	0.574596	0.0382864		0.655439	2.6734	0	0.177733	30.7081	13.0702	0.0624694	3.673	0.224211	-0.161814		0.376713	23.7602	3.46944
CISMON	46°02'N	11°45'E	46.0333	11.75	124.737	Aptian	626000	175000	175000	65300	1510000	89800	0.237022	0.0662603	0.0662603	0.0247245	0.571731	0.034001		0.653534	2.69588	0	0.206094	29.3071	12.5454	0.056132	2.67994	0.177787	-0.191111		1.11041	21.6722	6.26458
CISMON	46°02'N	11°45'E	46.0333	11.75	124.781	Aptian	413000	117000	110000	34500	948000	61900	0.245191	0.0694609	0.0653052	0.0204821	0.562812	0.036749		0.638219	2.65976	0	0.205679	30.3453	13.0343	0.0612932	3.18841	0.191404	-0.208875		0.344614	25.032	3.96543
CISMON	46°02'N	11°45'E	46.0333	11.75	125.16	Aptian	129000	14100	13800	4180	188000	10500	0.358752	0.0392124	0.0383781	0.0116247	0.522832	0.0292007		0.668859	2.35897	0.190353	0.139127	40.694	7.52688	0.0528967	3.30144	0.246595	0.201279		0.453727	20.9135	4.00187
CISMON	46°02'N	11°45'E	46.0333	11.75	125.288	Aptian	711000	132000	124000	34400	1200000	56200	0.314936	0.0584692	0.0549256	0.0152374	0.531538	0.0248937		0.619158	2.43976	0.104745	0.187767	37.2057	7.32534	0.0447381	3.60465	0.162147	-0.0537683		0.328204	21.6451	3.48318
CISMON	46°02'N	11°45'E	46.0333	11.75	125.357	Aptian	568000	103000	89800	20800	893000	48200	0.329696	0.0597864	0.0521244	0.0120734	0.518342	0.0279777		0.60657	2.38554	0.15243	0.184967	38.8775	7.82214	0.0512112	4.31731	0.18411	-0.0410762		0.106706	20.4978	3.31649
CISMON	46°02'N	11°45'E	46.0333	11.75	125.419	Aptian	304000	53600	43200	10700	393000	16200	0.370415	0.0653101	0.052638	0.0130377	0.47886	0.0197392		0.566694	2.20409	0.350714	0.208051	43.6155	5.05934	0.0395894	4.03738	0.130962	0.0157421		0.295952	20.1022	3.49673
CISMON	46°02'N	11°45'E	46.0333	11.75	125.479	Aptian	2140000	369000	270000	52200	2720000	80600	0.379985	0.0655208	0.047942	0.0092688	0.482972	0.0143116		0.521897	2.17834	0.169161	0.197949	44.0329	3.62965	0.0287795	5.17241	0.104431	-0.0859155		0.186041	17.5694	3.30751
CISMON	46°02'N	11°45'E	46.0333	11.75	125.514	Aptian	767000	89700	72700	14100	802000	20800	0.434241	0.0507841	0.0411595	0.00798279	0.454057	0.011776		0.545362	2.02038	0.165687	0.176624	48.8846	2.64026	0.0252795	5.15603	0.105423	0.137124		0.498485	17.446	3.5812
CISMON	46°02'N	11°45'E	46.0333	11.75	125.576	Aptian	434000	70900	57400	14100	579000	22400	0.368484	0.060197	0.0487349	0.0119715	0.491594	0.0190185		0.569782	2.23603	0.216572	0.191449	42.843	4.90798	0.0372464	4.07092	0.135922	-0.0069237		0.256627	19.5121	3.40644
CISMON	46°02'N	11°45'E	46.0333	11.75	125.609	Aptian	35200	9490	11500	1930	76800	7430	0.247278	0.0666667	0.0807868	0.0135581	0.539515	0.0521953		0.687315	2.63576		0.213906	31.4286	17.429	0.0882109	5.95855	0.244811	-0.00661643		0.210074	27.3426	3.24675
CISMON	46°02'N	11°45'E	46.0333	11.75	125.665	Aptian	38900	10400	11700	1870	78000	6630	0.263729	0.0705085	0.079322	0.012678	0.528814	0.0449492		0.660131	2.56224		0.220718	33.2763	14.5618	0.078341	6.25668	0.216667	-0.033773		0.165004	25.7691	3.22604
CISMON	46°02'N	11°45'E	46.0333	11.75	125.704	Aptian	35600	10100	11300	1990	74100	6180	0.255619	0.072521	0.0811374	0.0142888	0.53206	0.0443742		0.658438	2.5834		0.22562	32.4521	14.7918	0.0769806	5.67839	0.208996	-0.061043		0.257926	26.2337	3.26827
CISMON	46°02'N	11°45'E	46.0333	11.75	125.849	Aptian	26700	7680	8620	1800	61500	5290	0.239269	0.0688234	0.0772471	0.0161305	0.551125	0.0474057		0.671655	2.66583		0.213217	30.2721	16.5364	0.0792035	4.78889	0.226165	-0.0952864		0.217187	27.1968	3.32563
DSDP 249	29°57'S	36°05'E	-29.95	36.0833	Berriasian- Barremian (137.89 +/- 7.12)	Valangian	12053400	3156570	3394930	756899	28195800	2298990	0.241761	0.063313	0.0680939	0.0151815	0.565538	0.0461121		0.671444	2.69165	0.0662836	0.193328	29.9469	16.0182	0.0753896	4.48531	0.239294	-0.121881		0.34228	26.0524	3.3655
DSDP 249	29°57'S	36°05'E	-29.95	36.0833	Berriasian- Barremian (137.89 +/- 7.12)	Valangian	23042900	4902420	3888420	1052890	44582300	2637120	0.287655	0.0611991	0.0485409	0.0131437	0.556541	0.0329204		0.607205	2.55556	0.0841129	0.172506	34.0744	10.2692	0.0558482	3.69309	0.211293	-0.209029		0.293941	20.1667	3.37673
DSDP 249	29°57'S	36°05'E	-29.95	36.0833	Berriasian- Barremian (137.89 +/- 7.12)	Valangian	9646530	1983730	1451430	501633	17282900	845093	0.304198	0.0625559	0.0457701	0.0158187	0.545007	0.0266496		0.585157	2.48818	0.055853	0.17842	35.8215	8.05493	0.0466181	2.89341	0.176728	-0.211953		0.195514	19.6782	3.50499
DSDP 249	29°57'S	36°05'E	-29.95	36.0833	Berriasian- Barremian (137.89 +/- 7.12)	Valangian	4151870	900890	657679	236232	7565330	378840	0.298893	0.064855	0.0473462	0.0170063	0.544627	0.0272726		0.585539	2.49817	0.10482	0.184291	35.434	8.3616	0.0476878	2.78404	0.174288	-0.22075		0.336459	19.9979	3.65667
DSDP 249	29°57'S	36°05'E	-29.95	36.0833	Berriasian- Barremian (137.89 +/- 7.12)	Valangian	328584	76608	53908	18312	590562	33870	0.298213	0.0695271	0.0489253	0.0166194	0.535976	0.0307394		0.580685	2.4841	0.0769057	0.192468	35.7488	9.34463	0.0542413	2.94386	0.185388	-0.221737		0.378626	20.149	3.68371
DSDP 249	29°57'S	36°05'E	-29.95	36.0833	Berriasian- Barremian (137.89 +/- 7.12)	Valangian	7080530	1554280	1218900	332133	14038200	786822	0.283098	0.0621442	0.0487348	0.0132795	0.561284	0.0314592		0.600661	2.57043	0.0654766	0.173188	33.5273	10.0011	0.0530739	3.66992	0.202157	-0.245099		0.297663	19.9648	3.3699
DSDP 249	29°57'S	36°05'E	-29.95	36.0833	Berriasian- Barremian (137.89 +/- 7.12)	Valangian	1897050	771587	1785480	401036	12270300	2243320	0.0979437	0.0398366	0.0921834	0.0207053	0.633509	0.115821		0.851658	3.28364	0.0546225	0.169308	13.3903	54.1816	0.154567	4.45217	0.43129	0.0586496		0.387918	27.1573	3.94829
DSDP 367	12°29'N	20°03'W	12.4833	20.05	94.1667	Cenomanian	242000	44900	25100	63600	2270000	377000	0.0800635	0.0148548	0.00830411	0.0210415	0.751009	0.124727		0.912064	3.59753	n/a	0.0480472	9.63376	60.9047	0.142425	0.394654	0.738347	0.0519577		2.44387	16.7494	8.65788
DSDP 367	12°29'N	20°03'W	12.4833	20.05	94.2052	Cenomanian	395000	67200	65400	39200	2840000	484000	0.101522	0.0172715	0.0168089	0.010075	0.729927	0.124396		0.89753	3.49841	n/a	0.0491447	12.2102	55.0626	0.145608	1.66837	0.73803	0.0749536		1.52279	14.2962	8.22599
DSDP 367	12°29'N	20°03'W	12.4833	20.05	94.2227	Cenomanian	223000	45600	50700	31400	1450000	286000	0.106867	0.0218527	0.0242967	0.0150477	0.694877	0.137059		0.889775	3.44333	n/a	0.0685196	13.3293	56.1886	0.164747	1.61465	0.691322	0.0899852		1.71251	17.7206	8.23304
DSDP 367	12°29'N	20°03'W	12.4833	20.05	94.2549	Cenomanian	1230000	200000	364000	100000	6190000	1070000	0.134367	0.0218484	0.039764	0.0109242	0.676207	0.116889		0.88466	3.30653	n/a	0.0837961	16.5768	46.5217	0.147383	3.64	0.61707	0.200587		1.25879	19.9663	7.22226
DSDP 367	12°29'N	20°03'W	12.4833	20.05	94.2903	Cenomanian	148000	24000	42000	50000	2450000	386000	0.0477419	0.00774194	0.0135484	0.016129	0.790323	0.124516		0.952191	3.74258	n/a	0.0392954	5.69669	72.2846	0.136107	0.84	0.768924	0.12437		2.18319	16.2546	8.61148
DSDP 367	12°29'N	20°03'W	12.4833	20.05	94.3078	Cenomanian	167000	26400	98000	46500	2430000	434000	0.0521565	0.0082451	0.0306068	0.0145226	0.758924	0.135545		0.956356	3.6909	n/a	0.0563116	6.4305	72.213	0.151536	2.10753	0.717474	0.199234		1.92851	17.1742	8.486
DSDP 367	12°29'N	20°03'W	12.4833	20.05	94.3266	Cenomanian	214000	55300	106000	75800	3020000	454000	0.0545209	0.0140888	0.0270057	0.0193116	0.769407	0.115666		0.919983	3.66633	n/a	0.0638894	6.61719	67.9641	0.130685	1.39842	0.656924	0.0252283		1.9673	17.8416	8.53488
DSDP 367	12°29'N	20°03'W	12.4833	20.05	94.3844	Cenomanian	236000	28700	52600	52100	2080000	322000	0.0851555	0.0103558	0.0189796	0.0187992	0.750523	0.116187		0.936978	3.57155	n/a	0.052615	10.19	57.7061	0.134055	1.0096	0.707071	0.211697		2.06284	17.3869	8.56337
DSDP 367	12°29'N	20°03'W	12.4833	20.05	94.401	Cenomanian	569000	191000	338000	246000	6690000	1030000	0.0627758	0.0210724	0.0372904	0.0271403	0.738085	0.113636		0.894183	3.58396	n/a	0.0912301	7.83855	64.4153	0.13342	1.37398	0.570637	-0.0279304		2.0049	17.5109	8.56617
DSDP 367	12°29'N	20°03'W	12.4833	20.05	94.5157	Cenomanian	180000	112000	115000	87400	4050000	696000	0.0343485	0.0213724	0.0219449	0.0166781	0.772842	0.132814		0.889153	3.73792	n/a	0.0621295	4.25532	79.4521	0.14665	1.31579	0.688836	-0.207801		2.08137	17.1074	8.56581
DSDP 367	12°29'N	20°03'W	12.4833	20.05	94.5251	Cenomanian	233000	166000	250000	156000	7320000	1050000	0.0253951	0.0180926	0.027248	0.0170027	0.79782	0.114441		0.897657	3.77264	n/a	0.0639678	3.08487	81.8394	0.125448	1.60256	0.647349	-0.198621		2.00012	17.5272	8.53896
DSDP 367	12°29'N	20°03'W	12.4833	20.05	94.5587	Cenomanian	199000	66000	194000	107000	2760000	526000	0.0516615	0.017134	0.0503634	0.0277778	0.716511	0.136552		0.926092	3.61345	n/a	0.100465	6.72525	72.5517	0.160073	1.81308	0.589026	0.110847		1.78657	18.3945	8.45873
DSDP 367	12°29'N	20°03'W	12.4833	20.05	94.6053	Cenomanian	132000	51900	89400	18700	3160000	391000	0.0343482	0.0135051	0.0232631	0.00486599	0.822274	0.101743		0.905808	3.7707	n/a	0.0431151	4.00972	74.761	0.11011	4.78075	0.709619	-0.154154		2.17302	14.9567	8.63545
DSDP 367	12°29'N	20°03'W	12.4833	20.05	94.681	Cenomanian	254000	92000	261000	151000	5690000	1180000	0.0332984	0.0120608	0.034216	0.0197955	0.745936	0.154693		0.945368	3.7424	n/a	0.0683483	4.27322	82.2873	0.171761	1.72848	0.700713	0.0868237		1.98503	17.8199	8.5724
DSDP 398	40°57.6'N	10°43.1'W	40.96	-10.7183	124.75 +/-1.75	Aptian	273742	75162.3	146117	59074.5	1.04838e+06	250103	0.147762	0.0405716	0.0788719	0.0318876	0.565904	0.135003		0.858306	3.0976	0.16	0.177569	20.7047	47.7437	0.192611	2.47343	0.471487	0.277311		1.63568	21.359	8.12413
DSDP 398	40°57.6'N	10°43.1'W	40.96	-10.7183	124.75 +/-1.75	Aptian	1.68624e+07	4.91592e+06	1.36087e+07	8.11982e+06	1.572e+08	4.17556e+07	0.0695463	0.020275	0.0561271	0.033489	0.648348	0.172215		0.92813	3.51525	0.16	0.118105	9.68754	71.2335	0.209874	1.67599	0.610462	0.220025		2.34065	17.5229	8.64912
DSDP 398	40°57.6'N	10°43.1'W	40.96	-10.7183	124.75 +/-1.75	Aptian	2.4887e+06	961247	2.39402e+06	678794	1.94698e+07	6.23245e+06	0.0772288	0.0298292	0.0742908	0.0210642	0.604183	0.193404		0.906371	3.43195	0.19	0.135661	11.3336	71.4636	0.242486	3.52688	0.607066	0.187549		1.27678	21.7029	7.5491
DSDP 398	40°57.6'N	10°43.1'W	40.96	-10.7183	124.75 +/-1.75	Aptian	1.55885e+07	7.65606e+06	2.5319e+07	1.1109e+07	1.82103e+08	4.89932e+07	0.0536113	0.0263305	0.0870761	0.0382055	0.626281	0.168496		0.917745	3.49421	0.06	0.160201	7.88527	75.8624	0.212004	2.27915	0.526372	0.18542		2.13652	17.683	8.63998
DSDP 398	40°57.6'N	10°43.1'W	40.96	-10.7183	124.75 +/-1.75	Aptian	1.21873e+06	398839	1.4003e+06	837415	2.04702e+07	4.89825e+06	0.0417034	0.0136478	0.0479164	0.0286553	0.700465	0.167612		0.947067	3.66775	0.28	0.0941457	5.61913	80.0763	0.193084	1.67217	0.650084	0.170831		2.01037	17.7202	8.59321
DSDP 398	40°57.6'N	10°43.1'W	40.96	-10.7183	124.75 +/-1.75	Aptian	3.61815e+06	1.62895e+06	5.21468e+06	1.8127e+06	4.07396e+07	1.05699e+07	0.0569035	0.0256189	0.0820124	0.0285087	0.640721	0.166236		0.915275	3.503	0.24	0.144354	8.15675	74.4987	0.206003	2.87675	0.549766	0.163498		1.10528	22.3682	7.46453
DSDP 398	40°57.6'N	10°43.1'W	40.96	-10.7183	124.75 +/-1.75	Aptian	2.83831e+06	893926	2.79223e+06	1.81436e+06	4.78385e+07	1.13444e+07	0.0420355	0.0132391	0.041353	0.0268708	0.70849	0.168011		0.946932	3.68256	0.2	0.0850376	5.60081	79.9876	0.191684	1.53896	0.673462	0.155277		2.11643	17.4387	8.61146
DSDP 398	40°57.6'N	10°43.1'W	40.96	-10.7183	124.75 +/-1.75	Aptian	3.84604e+06	1.14763e+06	3.41988e+06	1.81845e+06	4.52531e+07	9.23083e+06	0.0594296	0.0177333	0.0528445	0.028099	0.699257	0.142636		0.926513	3.57529	0.13	0.104912	7.83321	70.589	0.169423	1.88065	0.591084	0.151269		1.71874	18.736	8.41006
DSDP 398	40°57.6'N	10°43.1'W	40.96	-10.7183	124.75 +/-1.75	Aptian	6.35952e+06	2.19284e+06	3.74736e+06	1.38033e+06	2.19169e+07	3.74462e+06	0.161649	0.0557386	0.0952518	0.0350857	0.557093	0.0951823		0.801824	2.9606	0.47	0.221955	22.4905	37.0603	0.145924	2.71484	0.338416	0.146498		1.09141	21.783	7.56812
DSDP 398	40°57.6'N	10°43.1'W	40.96	-10.7183	124.75 +/-1.75	Aptian	305752	119978	260252	82023.3	1.90765e+06	471877	0.0971402	0.0381182	0.0826846	0.0260595	0.606078	0.14992		0.871562	3.30566	0.22	0.162663	13.8137	60.6815	0.198307	3.17291	0.505151	0.135179		0.75221	25.2357	5.9731
DSDP 398	40°57.6'N	10°43.1'W	40.96	-10.7183	124.75 +/-1.75	Aptian	2.18133e+06	754170	2.37876e+06	1.29272e+06	3.74654e+07	8.54564e+06	0.041456	0.0143329	0.045208	0.024568	0.712026	0.162409		0.941859	3.67619	0.22	0.0877465	5.50192	79.665	0.18573	1.84012	0.658812	0.133739		1.91028	17.877	8.5241
DSDP 398	40°57.6'N	10°43.1'W	40.96	-10.7183	124.75 +/-1.75	Aptian	2.12193e+07	1.19202e+07	3.28309e+07	1.02489e+07	1.90292e+08	4.67705e+07	0.0677323	0.0380495	0.104797	0.0327146	0.607414	0.149292		0.882872	3.37261	0.03	0.188316	10.0322	68.7905	0.197292	3.20336	0.459569	0.12539		1.58873	20.1301	8.28607
DSDP 398	40°57.6'N	10°43.1'W	40.96	-10.7183	124.75 +/-1.75	Aptian	6.88244e+06	4.42223e+06	1.54064e+07	6.17851e+06	1.2753e+08	3.37151e+07	0.035452	0.0227792	0.0793595	0.031826	0.656914	0.173669		0.925953	3.59931	0.07	0.138889	5.1204	83.0472	0.209093	2.49355	0.564532	0.124241		1.75412	18.8186	8.45786
DSDP 398	40°57.6'N	10°43.1'W	40.96	-10.7183	124.75 +/-1.75	Aptian	199819	106085	321457	126834	2.60148e+06	651038	0.049871	0.0264768	0.0802294	0.0316553	0.649281	0.162487		0.911993	3.52897	0.04	0.145624	7.13307	76.5156	0.200164	2.53447	0.540095	0.120141		1.61053	19.5912	8.32408
DSDP 398	40°57.6'N	10°43.1'W	40.96	-10.7183	124.75 +/-1.75	Aptian	2.66827e+06	1.00391e+06	2.51746e+06	738610	1.77656e+07	3.38042e+06	0.0950433	0.0357593	0.0896715	0.0263092	0.632807	0.12041		0.868604	3.3069	0.14	0.167677	13.0581	55.8868	0.159861	3.40837	0.44244	0.11913		0.424021	27.0447	4.70952
DSDP 398	40°57.6'N	10°43.1'W	40.96	-10.7183	124.75 +/-1.75	Aptian	1.01925e+06	371848	1.05805e+06	404735	1.29839e+07	2.91982e+06	0.0543378	0.0198238	0.0564064	0.0215771	0.692195	0.15566		0.92179	3.58879	0.07	0.103427	7.27869	74.1246	0.183593	2.61418	0.614123	0.112425		1.48353	20.1396	7.98357
DSDP 398	40°57.6'N	10°43.1'W	40.96	-10.7183	124.75 +/-1.75	Aptian	2.46004e+06	994452	2.46658e+06	919505	1.99391e+07	4.18105e+06	0.0794568	0.0321198	0.0796681	0.0296991	0.644013	0.135044		0.883847	3.39678	0.2	0.153699	10.9827	62.9573	0.173343	2.68251	0.48835	0.106197		1.10029	22.7546	7.3238
DSDP 398	40°57.6'N	10°43.1'W	40.96	-10.7183	124.75 +/-1.75	Aptian	4.67235e+06	2.69473e+06	7.62815e+06	2.87703e+06	6.33287e+07	1.75663e+07	0.0473067	0.0272837	0.0772337	0.0291294	0.641191	0.177855		0.912413	3.54533	0.07	0.140283	6.871	78.9899	0.217149	2.6514	0.57096	0.106006		1.33322	20.8344	7.96906
DSDP 398	40°57.6'N	10°43.1'W	40.96	-10.7183	124.75 +/-1.75	Aptian	2.94778e+06	1.11433e+06	2.42391e+06	842811	1.87363e+07	3.88118e+06	0.0984354	0.0372108	0.0809419	0.028144	0.625664	0.129604		0.86513	3.3046	0.1	0.16227	13.5942	56.8341	0.1716	2.87599	0.469749	0.104105		0.805317	24.9243	6.18234
DSDP 398	40°57.6'N	10°43.1'W	40.96	-10.7183	124.75 +/-1.75	Aptian	9.70439e+06	4.35587e+06	9.04697e+06	3.20706e+06	5.77612e+07	1.30372e+07	0.0999292	0.0448538	0.0931595	0.0330241	0.594786	0.134248		0.853076	3.24638	0.12	0.190027	14.3842	57.3275	0.184145	2.82096	0.439746	0.102844		1.63913	20.8539	8.22708
DSDP 398	40°57.6'N	10°43.1'W	40.96	-10.7183	124.75 +/-1.75	Aptian	557985	240281	693639	372325	7.69402e+06	1.62577e+06	0.0498913	0.0214843	0.0620206	0.0332908	0.687948	0.145365		0.918049	3.57865	0.08	0.122929	6.76181	74.4483	0.174443	1.86299	0.554489	0.102596		2.1703	17.8512	8.62108
DSDP 398	40°57.6'N	10°43.1'W	40.96	-10.7183	124.75 +/-1.75	Aptian	202075	84704.8	204301	61855.8	1.97712e+06	517086	0.0663161	0.0277981	0.0670467	0.0202996	0.648844	0.169695		0.902408	3.49695	0.25	0.123323	9.2729	71.9013	0.207315	3.30286	0.595757	0.101807		1.19316	22.1685	7.39879
DSDP 398	40°57.6'N	10°43.1'W	40.96	-10.7183	124.75 +/-1.75	Aptian	791140	263497	497443	166842	3.52462e+06	592190	0.135568	0.0451523	0.0852408	0.0285897	0.603972	0.101476		0.826644	3.1232	0.33	0.183916	18.3314	42.809	0.143847	2.98152	0.389606	0.0989734		0.761354	25.786	5.71677
DSDP 398	40°57.6'N	10°43.1'W	40.96	-10.7183	124.75 +/-1.75	Aptian	94890.9	47242.5	123966	51928.4	1.01294e+06	231974	0.060713	0.0302266	0.0793159	0.0332247	0.648099	0.148421		0.896196	3.47461	0.18	0.151995	8.56546	70.9694	0.186337	2.38725	0.509708	0.0918313		1.8537	19.0481	8.48736
DSDP 398	40°57.6'N	10°43.1'W	40.96	-10.7183	124.75 +/-1.75	Aptian	1.00803e+06	539170	1.35315e+06	413944	1.03613e+07	2.47916e+06	0.0623982	0.0333754	0.0837619	0.0256237	0.641377	0.153463		0.887331	3.45713	0.08	0.152262	8.8662	71.0934	0.193074	3.26893	0.518065	0.0636433		0.818094	24.5308	6.25347
DSDP 398	40°57.6'N	10°43.1'W	40.96	-10.7183	124.75 +/-1.75	Aptian	3.25323e+06	1.57633e+06	4.35817e+06	1.86221e+06	4.2221e+07	8.16087e+06	0.0529567	0.0256598	0.0709432	0.0303134	0.687282	0.132844		0.901218	3.53899	0.04	0.134013	7.154	71.4982	0.16198	2.34033	0.511411	0.0535502		1.45726	20.1935	8.12406
DSDP 398	40°57.6'N	10°43.1'W	40.96	-10.7183	124.75 +/-1.75	Aptian	527278	191755	324456	135773	2.5928e+06	462014	0.124532	0.0452884	0.0766296	0.0320666	0.612366	0.109118		0.827868	3.18068	0.31	0.175888	16.8995	46.7015	0.151241	2.3897	0.414735	0.0472724		1.59313	21.7131	7.98331
DSDP 398	40°57.6'N	10°43.1'W	40.96	-10.7183	124.75 +/-1.75	Aptian	5.29305e+06	3.32762e+06	7.60198e+06	2.24338e+06	5.20629e+07	1.10647e+07	0.0648709	0.0407828	0.0931688	0.0274946	0.638076	0.135607		0.862709	3.40434	0.07	0.172646	9.22842	67.6419	0.175275	3.38862	0.456508	-0.00765692		0.537028	26.0056	5.56918
DSDP 398	40°57.6'N	10°43.1'W	40.96	-10.7183	124.75 +/-1.75	Aptian	2.40007e+06	1.22102e+06	1.11327e+06	1.22923e+06	2.78286e+07	7.40332e+06	0.0582605	0.0296397	0.027024	0.029839	0.675525	0.179712		0.888662	3.59415	0.21	0.0918541	7.93971	75.518	0.210131	0.905661	0.675064	-0.0665489		2.53858	16.8249	8.67069
DSDP 463	21°21'N	174°40'E	21.35	174.667	124.264	Aptian	58900	28700	40800	16100	356000	57800	0.105499	0.0514061	0.073079	0.0288375	0.63765	0.103529		0.799861	3.24879		0.171406	14.1962	49.5287	0.139681	2.53416	0.403068	-0.150624		0.970199	23.3322	6.65659
DSDP 463	21°21'N	174°40'E	21.35	174.667	124.325	Aptian	21000	5820	4620	4760	56400	16800	0.191956	0.0531993	0.0422303	0.0435101	0.515539	0.153565		0.818125	2.94461		0.171946	27.1318	44.4444	0.229508	0.970588	0.525	0.237607		1.68026	18.844	8.47821
DSDP 463	21°21'N	174°40'E	21.35	174.667	124.531	Aptian	16400	5800	7300	2940	46700	11900	0.180141	0.0637083	0.0801845	0.0322935	0.512961	0.130712		0.792412	2.89565		0.214898	25.9905	42.0495	0.203072	2.48299	0.425913	0.168878		1.6342	20.7395	8.22288
DSDP 463	21°21'N	174°40'E	21.35	174.667	124.667	Aptian	32400	22200	55800	12900	406000	51100	0.0558236	0.0382495	0.0961406	0.0222261	0.699518	0.0880427		0.843662	3.44745		0.165876	7.39051	61.1976	0.111792	4.32558	0.359859	-0.144008		0.443522	26.6798	4.22052
DSDP 463	21°21'N	174°40'E	21.35	174.667	124.912	Aptian	17200	8530	5890	1000	65000	25300	0.139928	0.0693947	0.0479173	0.00813537	0.528799	0.205825		0.790521	3.12813		0.145857	20.9246	59.5294	0.280177	5.89	0.621316	-0.0720891		1.72509	19.148	8.37044
DSDP 511	51°00'S	46°58'W	-51	-46.9667	124.131	Aptian	1200000	345000	417000	65700	3230000	354000	0.213839	0.0614787	0.074309	0.0117077	0.575583	0.0630825		0.708048	2.79988		0.187615	27.088	22.7799	0.0987723	6.34703	0.299568	-0.0906583		0.171019	27.8659	3.27861
DSDP 511	51°00'S	46°58'W	-51	-46.9667	124.158	Aptian	2920000	838000	985000	174000	7190000	847000	0.225413	0.0646904	0.0760383	0.0134321	0.555041	0.0653852		0.705345	2.73877		0.199023	28.8823	22.4847	0.105388	5.66092	0.29782	-0.0401468		0.235105	27.9122	3.32336
DSDP 511	51°00'S	46°58'W	-51	-46.9667	124.161	Aptian	1480000	463000	583000	99200	4010000	395000	0.21052	0.0658587	0.0829279	0.0141106	0.570396	0.0561862		0.69939	2.78038		0.206335	26.9581	21.0667	0.0896708	5.87702	0.25646	-0.104942		0.328089	27.7977	3.33044
DSDP 511	51°00'S	46°58'W	-51	-46.9667	124.215	Aptian	1740000	520000	621000	122000	4650000	531000	0.21261	0.0635386	0.0758798	0.0149071	0.568182	0.0648827		0.710145	2.79228		0.195996	27.23	23.3818	0.10249	5.09016	0.295987	-0.0747939		0.284584	28.3095	3.43145
DSDP 511	51°00'S	46°58'W	-51	-46.9667	124.237	Aptian	425000	118000	137000	24100	1030000	105000	0.231091	0.0641618	0.074493	0.0131042	0.560057	0.0570931		0.692788	2.72106		0.197369	29.2096	19.8113	0.092511	5.68465	0.273366	-0.0710534		0.232227	27.1895	3.27318
DSDP 511	51°00'S	46°58'W	-51	-46.9667	124.351	Aptian	495000	123000	133000	22300	969000	98400	0.268919	0.0668224	0.0722551	0.012115	0.52643	0.0534579		0.67348	2.56723		0.206807	33.8115	16.5824	0.0921866	5.96413	0.261216	0.0100614		0.250397	25.4205	3.28777
DSDP 511	51°00'S	46°58'W	-51	-46.9667	124.481	Aptian	16300000	4970000	5960000	981000	42300000	5260000	0.215122	0.0655924	0.0786581	0.0129469	0.558261	0.0694197		0.710558	2.77247		0.200282	27.8157	24.397	0.110597	6.07543	0.30633	-0.0533563		0.130339	28.094	3.32667
DSDP 511	51°00'S	46°58'W	-51	-46.9667	124.729	Aptian	1420000	357000	362000	74900	3050000	308000	0.25485	0.0640715	0.0649689	0.0134425	0.54739	0.0552774		0.676014	2.645		0.191214	31.7673	17.8241	0.0917213	4.83311	0.279517	-0.0583114		0.430794	25.2757	3.41501
DSDP 511	51°00'S	46°58'W	-51	-46.9667	125.186	Aptian	950000	258000	283000	55400	2030000	221000	0.250171	0.0679412	0.0745247	0.0145889	0.534576	0.0581977		0.684365	2.63185		0.209454	31.8792	18.8728	0.0981786	5.1083	0.270369	-0.0138741		0.194557	27.0756	3.36691
DSDP 511	51°00'S	46°58'W	-51	-46.9667	126.003	Aptian	618000	171000	203000	48500	1600000	173000	0.219655	0.0607784	0.0721521	0.0172383	0.568687	0.0614892		0.712846	2.7775		0.192439	27.8629	21.871	0.0975747	4.18557	0.290512	-0.0493353		0.333488	28.4404	3.60122
DSDP 511	51°00'S	46°58'W	-51	-46.9667	126.269	Aptian	663000	212000	294000	49900	1870000	221000	0.200308	0.0640503	0.0888244	0.015076	0.564972	0.0667694		0.727121	2.81389		0.210019	26.1745	25	0.105691	5.89178	0.284464	-0.028476		0.460619	28.6976	3.5391
DSDP 511	51°00'S	46°58'W	-51	-46.9667	126.334	Barremian	1190000	380000	463000	99500	3640000	460000	0.190935	0.0609707	0.074288	0.0159647	0.584035	0.0738067		0.729055	2.88881		0.186911	24.6377	27.8788	0.112195	4.65327	0.327986	-0.0955296		0.482591	28.8266	3.70993
DSDP 511	51°00'S	46°58'W	-51	-46.9667	126.362	Barremian	881000	269000	338000	75500	2600000	325000	0.196279	0.0599309	0.0753036	0.0168208	0.579258	0.0724073		0.733002	2.86766		0.189189	25.3088	26.9486	0.111111	4.47682	0.322581	-0.0582622		0.416244	29.0433	3.72447
DSDP 534	28°21'N	75°23'W	28.35	75.3833	130.011	Barremian	846515	500681	1761720	500009	15318200	3105780	0.0384205	0.0227242	0.0799586	0.0226937	0.695242	0.140961		0.914679	3.59553	0.0183432	0.130386	5.23681	78.5817	0.168573	3.52338	0.529257	0.0677988		1.0137	23.4371	6.60663
DSDP 534	28°21'N	75°23'W	28.35	75.3833	130.133	Barremian	1780800	935218	3497770	1012950	30878800	6371840	0.0400383	0.0210268	0.0786416	0.0227745	0.694259	0.14326		0.920863	3.59671	0.0141872	0.12755	5.45261	78.1568	0.171053	3.45305	0.539174	0.0995517		1.06571	23.1153	6.78031
DSDP 534	28°21'N	75°23'W	28.35	75.3833	130.963	Hauterivian	1386550	774860	2706840	767937	24910700	4894910	0.0391219	0.0218629	0.0763742	0.0216676	0.702862	0.138111		0.915265	3.60351	0.0161749	0.124787	5.2726	77.9263	0.164228	3.52482	0.535282	0.0629373		1.00702	23.3222	6.77106
DSDP 534	28°21'N	75°23'W	28.35	75.3833	131.195	Hauterivian	474030	257915	924414	274295	8031170	1709550	0.0406148	0.0220981	0.0792035	0.0235015	0.688108	0.146474		0.91854	3.58934	0.0158572	0.130087	5.57341	78.2912	0.175506	3.37015	0.539942	0.0945249		1.07394	23.0232	6.8085
DSDP 534	28°21'N	75°23'W	28.35	75.3833	131.944	Hauterivian	282054	170959	555242	179401	5407060	1109240	0.0366116	0.0221911	0.0720723	0.0232869	0.701855	0.143983		0.91515	3.61955	0.014109	0.122018	4.95778	79.7272	0.170225	3.09498	0.550534	0.0462849		1.20282	21.8166	7.29529
DSDP 534	28°21'N	75°23'W	28.35	75.3833	132.267	Hauterivian	247352	137766	477186	177089	5405200	1087060	0.0328417	0.0182916	0.0633574	0.0235126	0.717665	0.144332		0.926685	3.66353	0.0153439	0.108733	4.37593	81.4636	0.167439	2.69461	0.5785	0.063956		1.42413	20.1547	7.92195
DSDP 534	28°21'N	75°23'W	28.35	75.3833	132.286	Hauterivian	46175	22125	64592	20550	689893	154852	0.0462589	0.0221652	0.0647093	0.0205873	0.691146	0.155133		0.915592	3.59846		0.112674	6.2732	77.0304	0.183312	3.14316	0.59077	0.0697149		1.29988	21.7617	7.56896
DSDP 534	28°21'N	75°23'W	28.35	75.3833	132.456	Hauterivian	206396	92395	280987	104947	2803530	600750	0.0504758	0.022596	0.0687177	0.0256657	0.685626	0.146918		0.914376	3.56721		0.123198	6.85718	74.4289	0.176469	2.67742	0.556725	0.0945202		1.26055	21.2842	7.58523
DSDP 534	28°21'N	75°23'W	28.35	75.3833	132.523	Hauterivian	67927	27882	83663	31713	1038450	203851	0.0467339	0.0191828	0.0575602	0.0218186	0.714455	0.14025		0.919674	3.61858	0.04641	0.103394	6.13959	75.0064	0.164091	2.63813	0.587282	0.071329		1.4438	20.2941	7.90403
DSDP 534	28°21'N	75°23'W	28.35	75.3833	132.588	Hauterivian	86357	37582	93776	30062	1072270	208885	0.0564819	0.0245806	0.0613343	0.0196621	0.70132	0.136622		0.898511	3.558		0.111897	7.45339	70.7504	0.163044	3.11942	0.564089	0.020454		1.12898	22.5219	7.30793
DSDP 534	28°21'N	75°23'W	28.35	75.3833	132.798	Hauterivian	188983	102627	337897	121432	3338640	695108	0.0394975	0.0214491	0.0706205	0.0253793	0.697776	0.145278		0.91836	3.61104	0.015537	0.122279	5.35723	78.624	0.172323	2.7826	0.552962	0.0718574		1.27934	21.2597	7.58177
DSDP 534	28°21'N	75°23'W	28.35	75.3833	133.265	Hauterivian	31639	15840	52304	16826	582154	116457	0.0388104	0.0194303	0.0641594	0.0206398	0.714107	0.142853		0.921361	3.63751		0.108438	5.15467	78.6362	0.166698	3.10852	0.57816	0.0614118		1.32804	21.6564	7.61615
DSDP 534	28°21'N	75°23'W	28.35	75.3833	133.459	Hauterivian	30149	14886	50794	17377	493848	99976	0.0426418	0.0210543	0.0718414	0.0245775	0.698482	0.141403		0.91867	3.59801		0.122705	5.75366	76.8307	0.16836	2.92306	0.546218	0.0865454		1.25508	21.6721	7.36805
DSDP 534	28°21'N	75°23'W	28.35	75.3833	133.648	Hauterivian	192104	112455	362444	125543	3132260	663269	0.0418703	0.0245103	0.078997	0.0273629	0.682696	0.144564		0.911012	3.57363	0.012815	0.136589	5.77867	77.5415	0.17475	2.88701	0.524858	0.0703003		1.04845	22.4394	7.26158
DSDP 534	28°21'N	75°23'W	28.35	75.3833	134.251	Valangian	258577	166041	538779	160274	6407220	1288220	0.0293201	0.0188274	0.0610922	0.0181735	0.726515	0.146071		0.92289	3.68588	0.00620438	0.101056	3.87916	83.2831	0.1674	3.36161	0.59825	0.0212279		1.41263	21.6135	7.8934
DSDP 534	28°21'N	75°23'W	28.35	75.3833	134.537	Valangian	24878	12126	33498	10962	385291	80864	0.0454294	0.0221431	0.0611703	0.0200176	0.703575	0.147665		0.911779	3.60949		0.108249	6.0653	76.4729	0.17347	3.05583	0.588316	0.0384863		1.28349	21.6702	7.64874
DSDP 534	28°21'N	75°23'W	28.35	75.3833	134.574	Valangian	68605	42246	125595	41268	1455490	289521	0.0339171	0.0208857	0.062092	0.0204022	0.719569	0.143134		0.915276	3.65709		0.107009	4.50136	80.8433	0.165914	3.0434	0.580633	0.0094125		1.35859	21.4001	7.73266
DSDP 534	28°21'N	75°23'W	28.35	75.3833	134.669	Valangian	185464	102367	350334	109345	3526860	736027	0.0370158	0.0204309	0.0699214	0.0218236	0.703908	0.1469		0.921139	3.62898		0.116488	4.9959	79.8735	0.172659	3.20393	0.567015	0.0687571		1.21512	21.9091	7.39181
DSDP 534	28°21'N	75°23'W	28.35	75.3833	134.734	Valangian	138429	57344	181007	68338	2309690	446456	0.043242	0.0179129	0.0565424	0.0213472	0.721493	0.139462		0.923861	3.63886		0.100132	5.6545	76.3323	0.161986	2.6487	0.592789	0.0734471		1.47533	20.2567	7.96972
DSDP 534	28°21'N	75°23'W	28.35	75.3833	134.881	Valangian	57458	30030	81505	29561	1041400	235035	0.0389549	0.0203595	0.055258	0.0200415	0.706039	0.159347		0.920161	3.65254		0.0995364	5.22888	80.3558	0.184134	2.75718	0.624875	0.039962		1.48287	20.2904	8.08637
DSDP 534	28°21'N	75°23'W	28.35	75.3833	134.936	Berriasian	50503	24730	70796	30218	896409	172430	0.0405619	0.0198621	0.0568603	0.0242698	0.719957	0.138488		0.917062	3.64018		0.105262	5.33344	77.3461	0.161325	2.34284	0.578287	0.0358146		1.51384	19.3701	8.11687
DSDP 534	28°21'N	75°23'W	28.35	75.3833	135.004	Berriasian	649985	223449	664406	237781	7815540	1529800	0.0584468	0.0200926	0.0597436	0.0213813	0.702776	0.13756		0.915852	3.56507		0.107501	7.67802	70.1812	0.163697	2.79419	0.576101	0.104495		1.32003	21.1081	7.62426
DSDP 534	28°21'N	75°23'W	28.35	75.3833	135.008	Berriasian	95963	49369	139448	57560	1565600	320483	0.0430632	0.0221542	0.062577	0.0258299	0.70256	0.143816		0.912908	3.6103	0.0788209	0.115537	5.77547	76.9567	0.16992	2.42265	0.565365	0.0436513		1.43493	20.1004	7.9636
DSDP 534	28°21'N	75°23'W	28.35	75.3833	135.814	Berriasian	26615	12928	38205	13709	485196	94138	0.039677	0.0192728	0.0569551	0.0204371	0.723319	0.140339		0.918682	3.64913		0.100659	5.20016	77.9591	0.162493	2.78686	0.592137	0.0354889		1.4089	20.7223	7.91671
DSDP 534	28°21'N	75°23'W	28.35	75.3833	136.529	Berriasian	136306	70451	239493	102480	3115510	609966	0.0318904	0.0164828	0.0560322	0.0239764	0.72891	0.142709		0.931092	3.68695	0.0144481	0.0996699	4.19169	81.7351	0.163728	2.33697	0.596608	0.0643243		1.60591	19.0317	8.24587
DSDP 534	28°21'N	75°23'W	28.35	75.3833	136.822	Berriasian	126496	64219	231774	92617	3315550	672211	0.0280923	0.0142618	0.0514725	0.0205685	0.73632	0.149285		0.939463	3.72133		0.0887973	3.67502	84.1624	0.168569	2.5025	0.633671	0.0754825		1.66229	19.3401	8.30871
DSDP 534	28°21'N	75°23'W	28.35	75.3833	137.126	Berriasian	282192	130518	468187	169995	6139960	1213100	0.0335785	0.0155306	0.0557103	0.020228	0.730604	0.144349		0.934142	3.68745		0.094647	4.39404	81.128	0.164979	2.75412	0.61212	0.0803659		1.51309	20.2429	8.10358
DSDP 534	28°21'N	75°23'W	28.35	75.3833	137.916	Berriasian	357894	132567	449735	190228	6816480	1314280	0.0386445	0.0143143	0.0485613	0.0205404	0.736027	0.141913		0.936474	3.68482		0.086769	4.9885	78.5971	0.161643	2.36419	0.629803	0.0956834		1.63068	19.2939	8.29551
DSDP 534	28°21'N	75°23'W	28.35	75.3833	138.113	Berriasian	47225	21689	77772	32497	1110130	209329	0.0315119	0.0144724	0.051895	0.0216843	0.740757	0.139679		0.936449	3.70506		0.0909167	4.08042	81.5926	0.158648	2.39321	0.613352	0.0753053		1.68563	19.1612	8.28094
DSDP 534	28°21'N	75°23'W	28.35	75.3833	138.186	Berriasian	22072	10088	38588	14437	495279	106049	0.0321509	0.0146946	0.0562087	0.0210295	0.721442	0.154475		0.940365	3.69387		0.0949866	4.26635	82.7725	0.176358	2.67285	0.626908	0.107883		1.60588	19.7703	8.18709
DSDP 534	28°21'N	75°23'W	28.35	75.3833	138.334	Berriasian	37443	17015	68900	30003	925388	189903	0.029514	0.0134119	0.0543096	0.0236495	0.729426	0.149689		0.944363	3.70944		0.0941497	3.88884	83.5304	0.170272	2.29644	0.620961	0.114247		1.69489	18.7289	8.34765
DSDP 534	28°21'N	75°23'W	28.35	75.3833	138.498	Berriasian	66866	36422	106936	47065	1407970	282860	0.0343234	0.018696	0.0548919	0.0241592	0.722733	0.145196		0.923044	3.67268		0.101221	4.53379	80.8805	0.167291	2.27209	0.597655	0.0352542		1.60906	18.9658	8.25394
DSDP 534	28°21'N	75°23'W	28.35	75.3833	138.863	Berriasian	60953	31425	98297	46069	1175070	248776	0.0367056	0.018924	0.059194	0.0277425	0.707622	0.149812		0.925983	3.65027		0.109894	4.93138	80.3205	0.174721	2.13369	0.585952	0.0734362		1.61056	19.0811	8.32815
DSDP 534	28°21'N	75°23'W	28.35	75.3833	139.109	Berriasian	52985	28082	81284	30172	833840	157078	0.044772	0.0237291	0.0686845	0.0254951	0.704589	0.13273		0.905325	3.58686		0.123435	5.97468	74.7766	0.158518	2.69402	0.529567	0.0271575		1.25292	21.2649	7.4989
DSDP 534	28°21'N	75°23'W	28.35	75.3833	139.422	Berriasian	20733	10966	33509	16590	384641	80472	0.0379093	0.0200508	0.0612696	0.030334	0.703297	0.147139		0.922522	3.63534		0.116054	5.11454	79.5139	0.173016	2.01983	0.568558	0.0697963		1.77147	18.5832	8.47408
DSDP 534	28°21'N	75°23'W	28.35	75.3833	139.557	Berriasian	26801	10082	23696	13343	340108	63516	0.0561223	0.0211121	0.0496204	0.0279408	0.712199	0.133005		0.908873	3.58499		0.10454	7.30454	70.3256	0.157364	1.77591	0.574094	0.0476622		1.76713	18.4814	8.43382
DSDP 534	28°21'N	75°23'W	28.35	75.3833	139.603	Berriasian	28173	13705	36746	15663	448137	82696	0.0450681	0.0219238	0.0587823	0.025056	0.716882	0.132288		0.907903	3.61134		0.110754	5.91485	74.5889	0.155785	2.34604	0.555715	0.0162133		1.47735	19.6995	8.00519
DSDP 545	33°40'N	09°22'W	33.0667	-9.36667	111.029	Albian	6.1676e+07	2.18544e+07	2.83576e+07	1.06278e+07	1.8242e+08	2.60298e+07	0.186351	0.0660321	0.0856813	0.0321114	0.551176	0.0786481		0.748423	2.85302		0.225927	25.2671	29.6786	0.124873	2.66825	0.299643	0.0203466		1.42037	21.8977	7.8745
DSDP 545	33°40'N	09°22'W	33.0667	-9.36667	111.04	Albian	7.69282e+07	2.82868e+07	3.72005e+07	1.45566e+07	2.38536e+08	3.25988e+07	0.179694	0.0660741	0.0868953	0.0340022	0.557188	0.0761462		0.74888	2.87521		0.227929	24.3857	29.7632	0.120231	2.55558	0.2894	7.96801e-05		1.0183	22.2649	7.31242
DSDP 545	33°40'N	09°22'W	33.0667	-9.36667	111.049	Albian	5.71628e+07	2.10069e+07	2.68787e+07	1.07183e+07	1.74962e+08	2.58595e+07	0.180559	0.0663541	0.0849011	0.0338556	0.552648	0.0816819		0.75129	2.87504		0.225899	24.6259	31.1477	0.128769	2.50774	0.306162	0.0103902		1.05907	22.1259	7.41476
DSDP 545	33°40'N	09°22'W	33.0667	-9.36667	111.054	Albian	5.80068e+07	2.00241e+07	2.61469e+07	9.87937e+06	1.77813e+08	2.64549e+07	0.182225	0.0629045	0.0821389	0.0310355	0.55859	0.0831066		0.757299	2.88707		0.215315	24.5979	31.3218	0.129511	2.64661	0.320645	0.0238327		1.40782	22.2924	7.75277
DSDP 545	33°40'N	09°22'W	33.0667	-9.36667	111.065	Albian	1.54999e+08	6.36612e+07	9.52642e+07	3.81559e+07	6.64758e+08	9.52458e+07	0.139377	0.0572449	0.0856627	0.0343103	0.597759	0.0856461		0.782226	3.06512		0.205918	18.908	38.061	0.125323	2.49671	0.325819	-0.0460003		1.09991	22.1771	7.51901
DSDP 545	33°40'N	09°22'W	33.0667	-9.36667	111.073	Albian	1.241e+08	5.04851e+07	7.30887e+07	2.98346e+07	5.24664e+08	6.872e+07	0.142498	0.0579694	0.0839239	0.0342575	0.602444	0.0789076		0.772721	3.054		0.205423	19.1287	35.6394	0.11581	2.44979	0.309371	-0.0766258		1.05155	22.3558	7.39347
DSDP 545	33°40'N	09°22'W	33.0667	-9.36667	111.085	Albian	8.80277e+07	3.60689e+07	5.37539e+07	2.11768e+07	3.80819e+08	5.19137e+07	0.139337	0.0570928	0.085086	0.0335204	0.60279	0.0821732		0.778601	3.06768		0.204144	18.7754	37.0968	0.119967	2.53834	0.318658	-0.0645562		1.22406	22.1791	7.68765
DSDP 545	33°40'N	09°22'W	33.0667	-9.36667	111.095	Albian	9.68712e+07	4.09264e+07	6.45862e+07	2.6428e+07	4.49018e+08	6.29267e+07	0.130773	0.0552495	0.0871895	0.0356771	0.606162	0.0849492		0.789978	3.1011		0.204913	17.7456	39.3789	0.122917	2.44385	0.322921	-0.0474893		0.966721	22.3184	7.25491
DSDP 545	33°40'N	09°22'W	33.0667	-9.36667	111.102	Albian	1.01557e+08	4.43778e+07	6.57367e+07	2.90964e+07	4.98203e+08	6.77347e+07	0.125891	0.0550111	0.0814878	0.0360681	0.617578	0.0839645		0.785558	3.13236		0.19742	16.9329	40.0106	0.119686	2.25927	0.327307	-0.0984616		0.914088	22.5113	7.11301
DSDP 545	33°40'N	09°22'W	33.0667	-9.36667	111.113	Albian	7.03294e+07	3.10047e+07	4.37275e+07	1.92102e+07	3.36118e+08	4.68145e+07	0.128525	0.0566601	0.0799108	0.035106	0.614246	0.085552		0.779729	3.12099		0.196996	17.3034	39.9632	0.122252	2.27627	0.332591	-0.1129		1.00394	22.2013	7.33843
DSDP 545	33°40'N	09°22'W	33.0667	-9.36667	111.118	Albian	7.27054e+07	2.99321e+07	4.60157e+07	1.93393e+07	3.43248e+08	4.91676e+07	0.129736	0.0534113	0.0821109	0.0345093	0.612497	0.0877353		0.792792	3.12209		0.195379	17.4792	40.3433	0.125295	2.37939	0.340367	-0.0558544		1.12495	21.9725	7.60116
DSDP 545	33°40'N	09°22'W	33.0667	-9.36667	111.126	Albian	6.77246e+07	2.89547e+07	4.37935e+07	1.86737e+07	3.24922e+08	4.63687e+07	0.127677	0.0545865	0.0825612	0.0352043	0.612555	0.0874161		0.789865	3.12521		0.197578	17.2483	40.641	0.124885	2.3452	0.336516	-0.0720996		1.02748	22.1277	7.40621
DSDP 545	33°40'N	09°22'W	33.0667	-9.36667	111.128	Albian	4.39059e+07	1.73277e+07	2.52999e+07	1.0696e+07	1.86899e+08	2.76471e+07	0.140826	0.0555775	0.0811478	0.0343068	0.599466	0.0886764		0.786	3.07336		0.199066	19.023	38.6386	0.128863	2.36536	0.341446	-0.0374984		1.09494	22.1327	7.51451
DSDP 545	33°40'N	09°22'W	33.0667	-9.36667	111.135	Albian	4.15523e+07	1.47011e+07	1.65741e+07	6.39436e+06	1.21915e+08	1.55137e+07	0.191794	0.067856	0.0765015	0.0295146	0.562727	0.0716067		0.723577	2.84674		0.215133	25.4193	27.1855	0.112885	2.59199	0.291702	-0.0756618		1.18427	22.1422	7.45268
DSDP 545	33°40'N	09°22'W	33.0667	-9.36667	111.138	Albian	3.52513e+07	1.21113e+07	1.40741e+07	5.31479e+06	1.01793e+08	1.32533e+07	0.193903	0.0666196	0.077416	0.0292345	0.559925	0.0729013		0.729377	2.84046		0.21495	25.7225	27.3239	0.1152	2.6481	0.29614	-0.0458703		1.13346	22.3907	7.32125
DSDP 545	33°40'N	09°22'W	33.0667	-9.36667	111.148	Albian	3.68533e+07	1.30104e+07	1.55795e+07	6.12717e+06	1.08804e+08	1.42218e+07	0.189383	0.0668583	0.0800607	0.0314866	0.559127	0.0730837		0.734151	2.85028		0.220086	25.3013	27.8449	0.1156	2.54269	0.290604	-0.0361762		1.52047	21.7967	7.86949
DSDP 545	33°40'N	09°22'W	33.0667	-9.36667	111.154	Albian	5.14613e+07	1.82901e+07	2.22993e+07	8.653e+06	1.54065e+08	1.96788e+07	0.187509	0.0666432	0.0812517	0.0315288	0.561364	0.0717034		0.734624	2.856		0.220832	25.0388	27.662	0.113263	2.57706	0.285526	-0.0399524		1.50851	21.893	7.84877
DSDP 545	33°40'N	09°22'W	33.0667	-9.36667	111.282	Albian	3.17673e+07	1.07953e+07	1.28005e+07	4.71097e+06	8.92659e+07	1.11312e+07	0.197963	0.0672724	0.0797683	0.0293571	0.556274	0.0693657		0.726272	2.81744		0.219937	26.2468	25.9478	0.110872	2.71717	0.282246	-0.0354647		1.16735	22.3483	7.40327
DSDP 545	33°40'N	09°22'W	33.0667	-9.36667	111.286	Albian	2.57265e+07	8.61483e+06	9.70732e+06	3.68867e+06	7.16077e+07	9.02123e+06	0.200415	0.0671114	0.0756221	0.0287356	0.557839	0.0702773		0.722389	2.81703		0.214447	26.4311	25.9621	0.111886	2.63165	0.290707	-0.0507378		1.10716	22.256	7.24994
DSDP 603	35°30'N	70°02'W	35.5	-70.0333	131.897	Hauterivian	165787	100790	303922	108330	2706610	521683	0.042432	0.0257965	0.0777867	0.0277263	0.692738	0.133521		0.902592	3.56958		0.137128	5.77173	75.8845	0.161597	2.80552	0.504176	0.0301358		1.05453	22.2878	7.28269
DSDP 603	35°30'N	70°02'W	35.5	-70.0333	132.196	Hauterivian	184312	105467	285168	98675	2396660	476112	0.0519717	0.0297392	0.0804107	0.027824	0.675802	0.134252		0.890756	3.51425		0.145538	7.14119	72.0919	0.165733	2.88997	0.493165	0.0241068		0.925033	23.2426	6.88942
DSDP 603	35°30'N	70°02'W	35.5	-70.0333	132.457	Hauterivian	144025	92422	297226	130920	2627850	513216	0.037845	0.0242854	0.0781011	0.0344014	0.690511	0.134856		0.910598	3.58516		0.142168	5.19594	78.0864	0.163389	2.27029	0.496444	0.0565875		2.16794	18.0645	8.6083
DSDP 603	35°30'N	70°02'W	35.5	-70.0333	132.532	Hauterivian	111171	68499	200851	83902	2014230	398922	0.0386336	0.0238044	0.0697987	0.0291572	0.699975	0.138631		0.908932	3.6053		0.127694	5.23059	78.2057	0.165312	2.39388	0.530359	0.0276669		1.40322	20.1988	8.06472
DSDP 603	35°30'N	70°02'W	35.5	-70.0333	133.027	Hauterivian	312378	172041	483747	216011	5564390	1086560	0.0398689	0.0219577	0.0617408	0.0275696	0.710185	0.138678		0.91215	3.6236		0.115888	5.31547	77.6703	0.163369	2.23946	0.554832	0.026345		1.48116	19.6696	8.15415
DSDP 603	35°30'N	70°02'W	35.5	-70.0333	133.027	Hauterivian	48072	28614	77531	32759	909294	158836	0.0383011	0.0227981	0.0617725	0.0261006	0.724476	0.126552		0.903896	3.62876		0.115079	5.02128	76.7665	0.148705	2.36671	0.533472	-0.0222226		1.44534	19.8804	7.98721
DSDP 603	35°30'N	70°02'W	35.5	-70.0333	133.164	Hauterivian	126022	80304	247989	121993	2771460	571954	0.0321507	0.0204872	0.063267	0.0311229	0.707055	0.145917		0.921443	3.65228		0.118693	4.34936	81.9447	0.171069	2.03281	0.55951	0.0470807		1.85222	18.3361	8.5224
DSDP 603	35°30'N	70°02'W	35.5	-70.0333	133.424	Hauterivian	35479	21482	62823	31801	677610	132721	0.0368837	0.0223325	0.0653103	0.0330601	0.704438	0.137976		0.913667	3.62179		0.125325	4.9754	78.9067	0.163786	1.9755	0.533387	0.036183		2.09362	17.93	8.6063
DSDP 603	35°30'N	70°02'W	35.5	-70.0333	133.548	Hauterivian	87178	57698	143778	62685	1505120	296720	0.040488	0.0267967	0.0667748	0.0291128	0.699022	0.137806		0.89713	3.595		0.127861	5.47498	77.2914	0.164676	2.29366	0.529025	-0.023711		1.43459	20.0178	8.10539
DSDP 603	35°30'N	70°02'W	35.5	-70.0333	134.224	Valangian	83644	52603	159036	70345	1658240	328509	0.0355572	0.0223616	0.0676065	0.0299038	0.704921	0.13965		0.913835	3.62557		0.124291	4.80193	79.7056	0.16535	2.2608	0.538104	0.0332922		1.56367	19.4256	8.28554
DSDP 603	35°30'N	70°02'W	35.5	-70.0333	135.474	Valangian	28429	15942	40258	15214	449802	90997	0.0443758	0.0248844	0.0628401	0.0237481	0.702111	0.14204		0.901842	3.59842		0.116649	5.94462	76.1953	0.168264	2.64612	0.560288	-0.00261658		1.30261	20.5265	7.70461
DSDP 603	35°30'N	70°02'W	35.5	-70.0333	135.618	Valangian	20250	12111	35974	17577	425736	82585	0.0340775	0.0203809	0.0605385	0.0295793	0.716446	0.138977		0.918305	3.65189		0.114397	4.5405	80.3083	0.162466	2.04665	0.557077	0.0307189		1.70049	18.7589	8.42096
[truncated: 451 more rows]

## Sheet: Eocene
Eocene DATA (Inglis et al. 2015; doi.org/10.1002/2014PA002723)
					1302	1300	1298	1296	1292	1292'	Fr.1302	Fr.1300	Fr.1298	Fr.1296	Fr.1292	Fr.1292'													OPTIMAL Op3
[truncated: 649 more rows]
